# Supplementary material for: Comparison of OMI UV observations with ground-based measurements at high northern latitudes
Source: Copernicus journal article supplement (doi:10.5194/acp-15-7391-2015), 2015-07-09

Summit, Greenland (72.58°N, 38.46°E)  
CSEDDose, SZA less than 84, Dist less than 12 km

| Month     | N    | Minimum | 5%   | 25%  | Median | Average | 75%  | 95%  | Maximum | W10 | W20 | W30 |
|-----------|------|---------|------|------|--------|---------|------|------|---------|-----|-----|-----|
| January   | 0    | 0.00    | 0.00 | 0.00 | 0.00   | 0.00    | 0.00 | 0.00 | 0.00    | 0   | 0   | 0   |
| February  | 47   | 0.78    | 0.82 | 0.87 | 0.90   | 0.92    | 0.98 | 1.02 | 1.08    | 49  | 87  | 100 |
| March     | 155  | 0.89    | 0.93 | 0.96 | 0.99   | 0.99    | 1.02 | 1.07 | 1.12    | 97  | 100 | 100 |
| April     | 153  | 0.98    | 1.00 | 1.02 | 1.05   | 1.05    | 1.08 | 1.13 | 1.21    | 86  | 99  | 100 |
| May       | 165  | 1.00    | 1.02 | 1.05 | 1.07   | 1.07    | 1.09 | 1.12 | 1.17    | 88  | 100 | 100 |
| June      | 147  | 1.04    | 1.05 | 1.07 | 1.09   | 1.09    | 1.11 | 1.14 | 1.18    | 62  | 100 | 100 |
| July      | 128  | 1.04    | 1.06 | 1.09 | 1.12   | 1.12    | 1.15 | 1.20 | 1.24    | 34  | 95  | 100 |
| August    | 185  | 1.06    | 1.07 | 1.10 | 1.14   | 1.14    | 1.18 | 1.23 | 1.31    | 23  | 88  | 99  |
| September | 181  | 1.03    | 1.06 | 1.11 | 1.14   | 1.14    | 1.18 | 1.22 | 1.29    | 19  | 86  | 100 |
| October   | 122  | 0.94    | 0.98 | 1.03 | 1.08   | 1.08    | 1.12 | 1.17 | 1.24    | 63  | 98  | 100 |
| November  | 0    | 0.00    | 0.00 | 0.00 | 0.00   | 0.00    | 0.00 | 0.00 | 0.00    | 0   | 0   | 0   |
| December  | 0    | 0.00    | 0.00 | 0.00 | 0.00   | 0.00    | 0.00 | 0.00 | 0.00    | 0   | 0   | 0   |
| Year      | 1283 | 0.78    | 0.95 | 1.04 | 1.09   | 1.08    | 1.13 | 1.19 | 1.31    | 58  | 95  | 100 |

Erythemal Dose [kJ/m<sup>2</sup>] versus Time

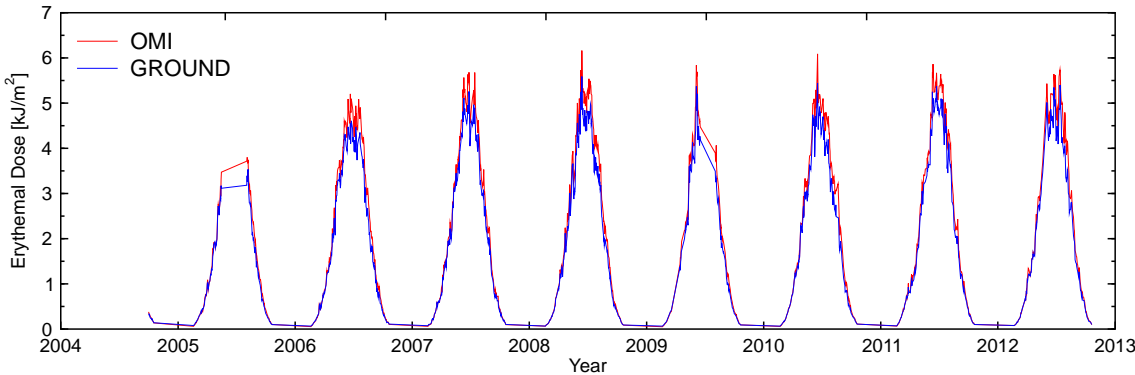

OMI versus Ground

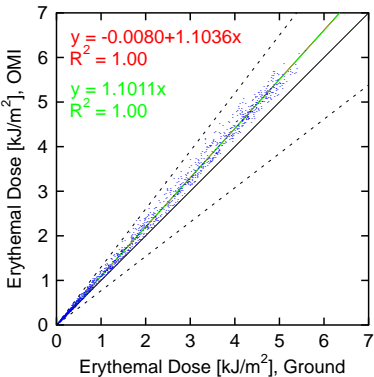

Ratio OMI / Ground

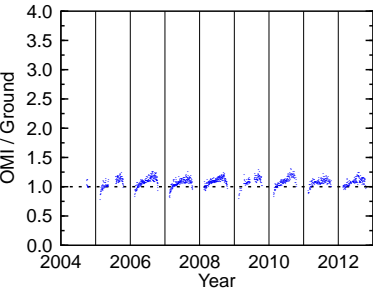

Ratio OMI / Ground

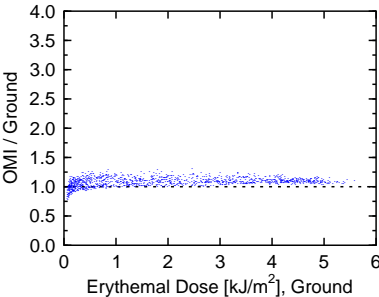

Ratio OMI / Ground

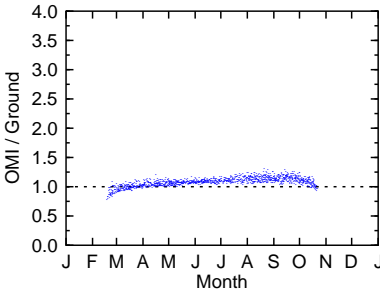

Ratio OMI / Ground

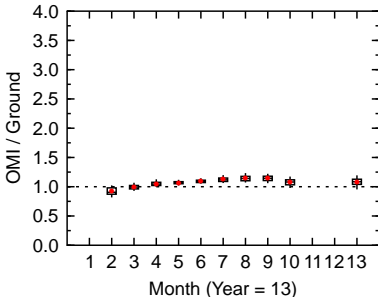

Difference OMI minus Ground

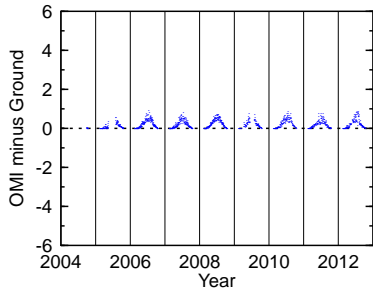

Difference OMI minus Ground

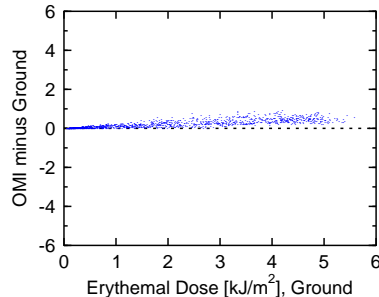

Difference OMI minus Ground

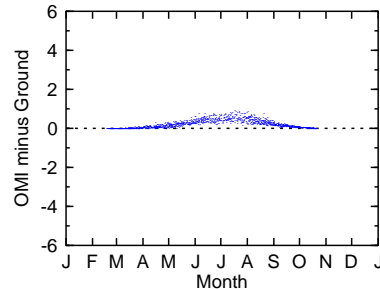

Difference OMI minus Ground

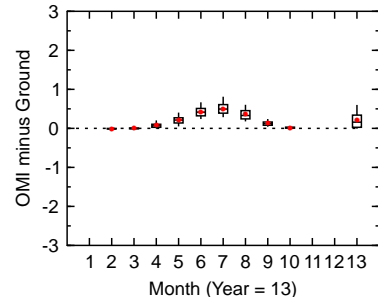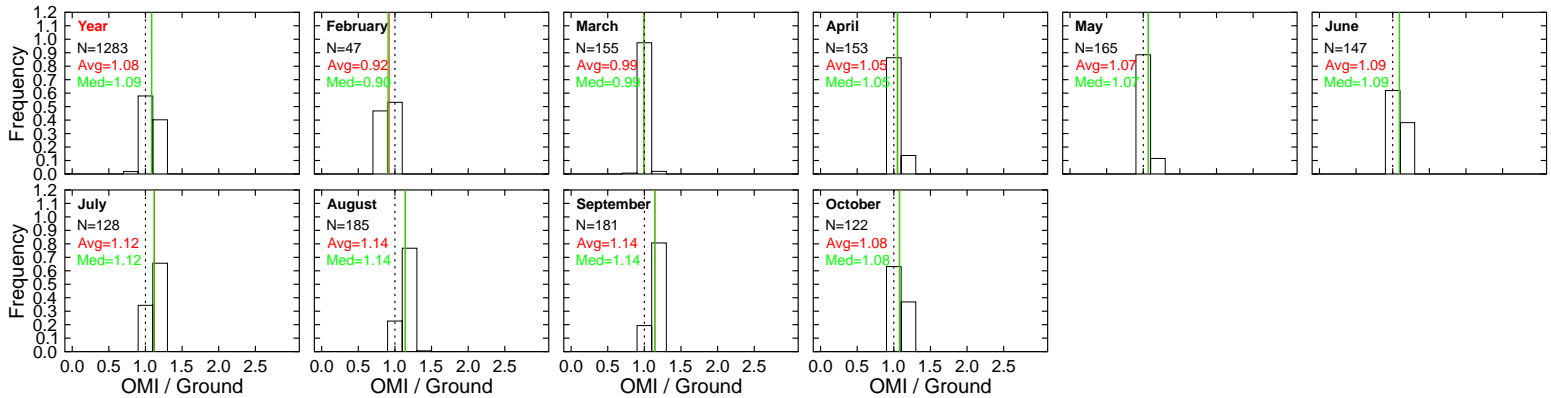

Supplement: Supplementary file 7 [file acp-15-7391-2015-supplement.zip]
