# Supplementary material for: Comparison of OMI UV observations with ground-based measurements at high northern latitudes
Source: Copernicus journal article supplement (doi:10.5194/acp-15-7391-2015), 2015-07-09

Alert, Canada (82.5°N, 62.32°E)

OPEDRate, SZA less than 84, Dist less than 12 km

| Month     | N   | Minimum | 5%   | 25%  | Median | Average | 75%  | 95%  | Maximum | W10 | W20 | W30 |
|-----------|-----|---------|------|------|--------|---------|------|------|---------|-----|-----|-----|
| January   | 0   | 0.00    | 0.00 | 0.00 | 0.00   | 0.00    | 0.00 | 0.00 | 0.00    | 0   | 0   | 0   |
| February  | 0   | 0.00    | 0.00 | 0.00 | 0.00   | 0.00    | 0.00 | 0.00 | 0.00    | 0   | 0   | 0   |
| March     | 63  | 1.00    | 1.04 | 1.10 | 1.16   | 1.15    | 1.20 | 1.28 | 1.34    | 22  | 79  | 95  |
| April     | 127 | 0.93    | 0.99 | 1.02 | 1.06   | 1.08    | 1.12 | 1.27 | 1.55    | 70  | 91  | 95  |
| May       | 95  | 0.89    | 0.94 | 1.02 | 1.06   | 1.07    | 1.11 | 1.25 | 1.34    | 72  | 91  | 98  |
| June      | 164 | 0.48    | 0.84 | 1.04 | 1.12   | 1.22    | 1.34 | 1.88 | 3.18    | 37  | 60  | 67  |
| July      | 274 | 0.37    | 0.61 | 0.93 | 1.08   | 1.15    | 1.30 | 1.81 | 3.33    | 30  | 47  | 62  |
| August    | 215 | 0.12    | 0.22 | 0.64 | 1.00   | 0.93    | 1.18 | 1.62 | 2.78    | 20  | 42  | 52  |
| September | 43  | 0.22    | 0.24 | 0.40 | 0.52   | 0.68    | 1.01 | 1.32 | 1.66    | 12  | 26  | 26  |
| October   | 0   | 0.00    | 0.00 | 0.00 | 0.00   | 0.00    | 0.00 | 0.00 | 0.00    | 0   | 0   | 0   |
| November  | 0   | 0.00    | 0.00 | 0.00 | 0.00   | 0.00    | 0.00 | 0.00 | 0.00    | 0   | 0   | 0   |
| December  | 0   | 0.00    | 0.00 | 0.00 | 0.00   | 0.00    | 0.00 | 0.00 | 0.00    | 0   | 0   | 0   |
| Year      | 981 | 0.12    | 0.42 | 0.97 | 1.07   | 1.08    | 1.19 | 1.65 | 3.33    | 37  | 59  | 69  |

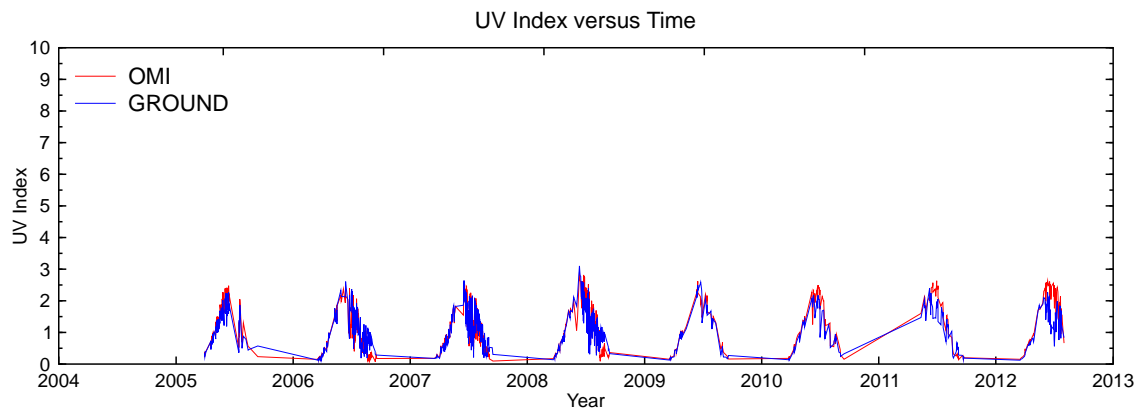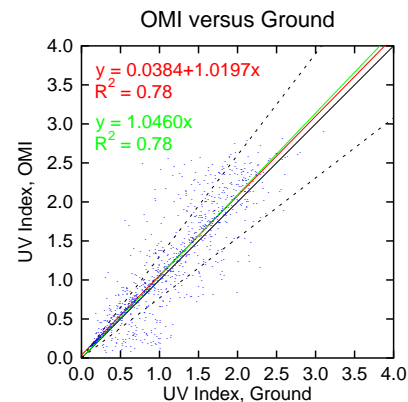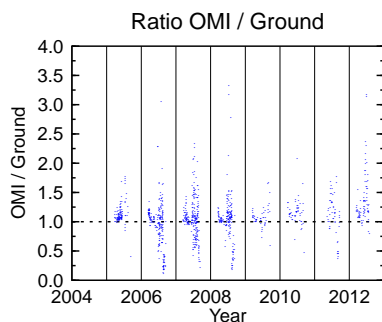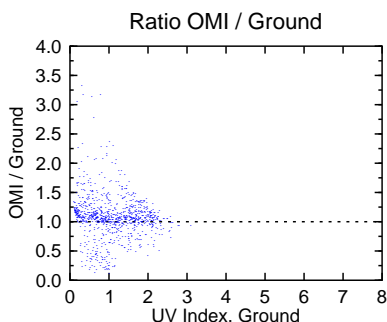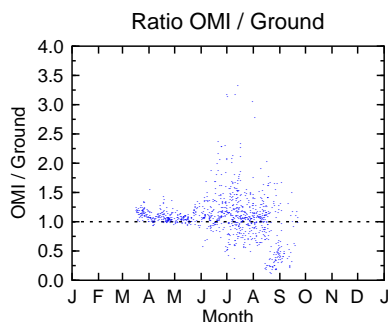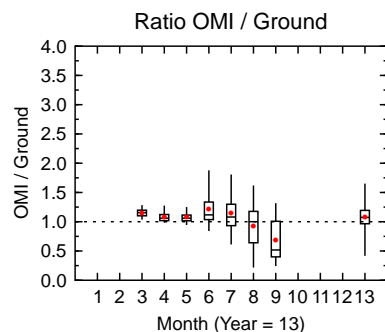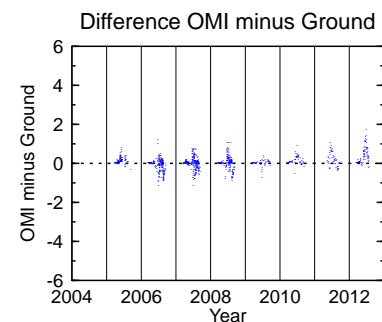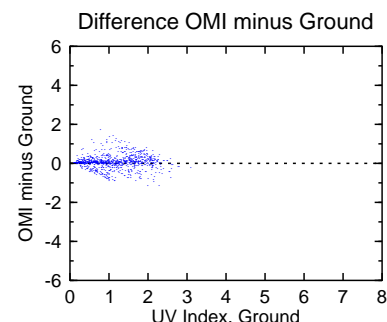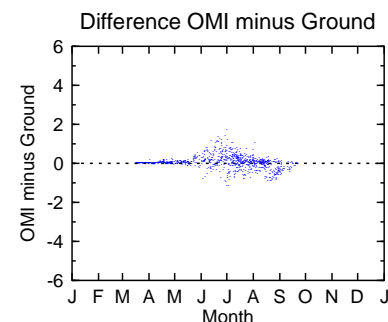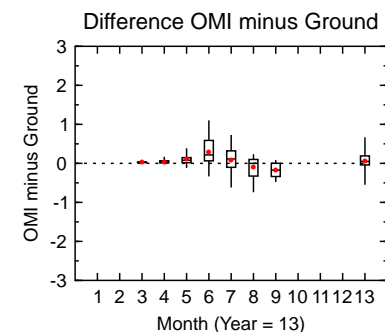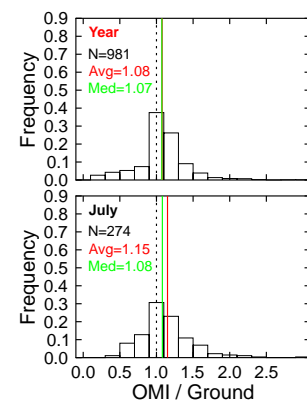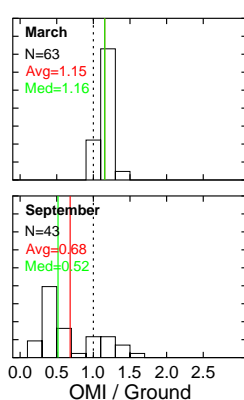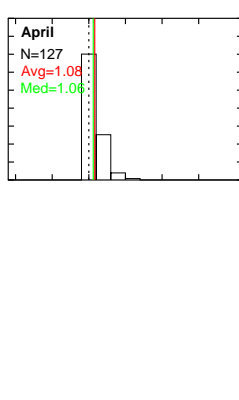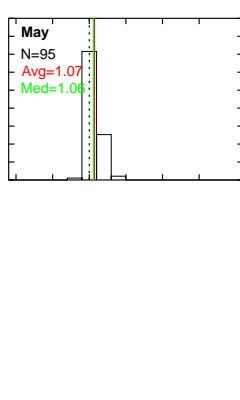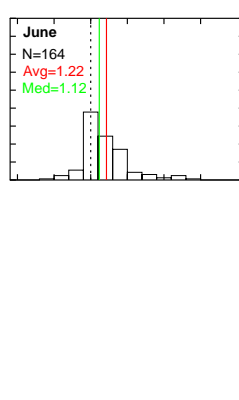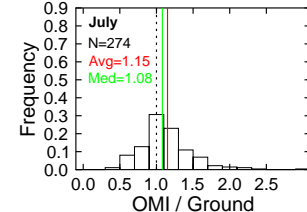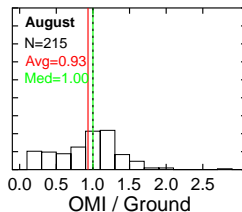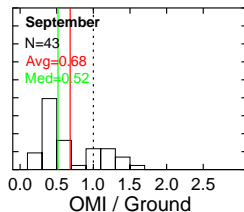

Supplement: Supplementary file 31 [file acp-15-7391-2015-supplement.zip]
