# Supplementary material for: Comparison of OMI UV observations with ground-based measurements at high northern latitudes
Source: Copernicus journal article supplement (doi:10.5194/acp-15-7391-2015), 2015-07-09

Trondheim, Norway (63.42°N, 10.4°E)

CSEDRate (Ground at local solar noon), SZA less than 84, Dist less than 12 km

| Month     | N    | Minimum | 5%   | 25%  | Median | Average | 75%  | 95%  | Maximum | W10 | W20 | W30 |
|-----------|------|---------|------|------|--------|---------|------|------|---------|-----|-----|-----|
| January   | 56   | 1.07    | 1.10 | 1.38 | 1.56   | 1.82    | 2.16 | 3.55 | 4.11    | 4   | 14  | 25  |
| February  | 192  | 1.10    | 1.19 | 1.32 | 1.50   | 1.84    | 2.01 | 3.32 | 8.23    | 1   | 6   | 22  |
| March     | 208  | 1.13    | 1.24 | 1.37 | 1.57   | 2.08    | 2.36 | 4.12 | 9.74    | 0   | 2   | 12  |
| April     | 223  | 1.17    | 1.31 | 1.43 | 1.94   | 2.48    | 2.91 | 6.04 | 8.26    | 0   | 1   | 4   |
| May       | 212  | 1.11    | 1.21 | 1.38 | 1.96   | 3.24    | 2.61 | 7.66 | 151.47  | 0   | 4   | 14  |
| June      | 226  | 1.02    | 1.16 | 1.27 | 1.80   | 2.33    | 2.69 | 4.98 | 26.91   | 2   | 12  | 28  |
| July      | 256  | 1.05    | 1.12 | 1.23 | 1.78   | 2.47    | 2.77 | 6.54 | 16.26   | 3   | 21  | 30  |
| August    | 229  | 1.02    | 1.09 | 1.21 | 1.66   | 2.26    | 2.44 | 5.18 | 20.36   | 6   | 24  | 37  |
| September | 212  | 1.09    | 1.15 | 1.28 | 1.70   | 2.23    | 2.61 | 4.85 | 7.33    | 0   | 13  | 28  |
| October   | 243  | 1.11    | 1.20 | 1.32 | 1.59   | 2.48    | 2.59 | 7.46 | 15.70   | 0   | 5   | 22  |
| November  | 112  | 1.11    | 1.18 | 1.33 | 1.49   | 1.91    | 2.07 | 4.27 | 7.21    | 0   | 5   | 21  |
| December  | 0    | 0.00    | 0.00 | 0.00 | 0.00   | 0.00    | 0.00 | 0.00 | 0.00    | 0   | 0   | 0   |
| Year      | 2169 | 1.02    | 1.16 | 1.32 | 1.66   | 2.35    | 2.54 | 5.39 | 151.47  | 1   | 10  | 22  |

UV Index versus Time

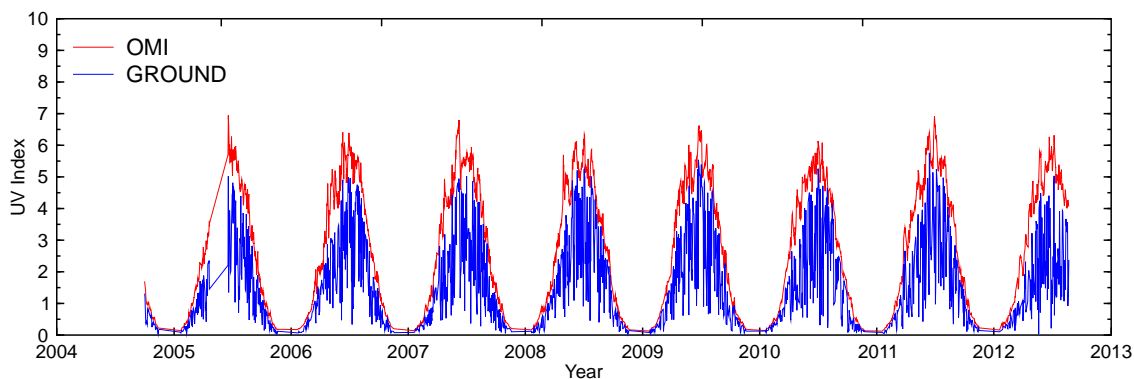

OMI versus Ground

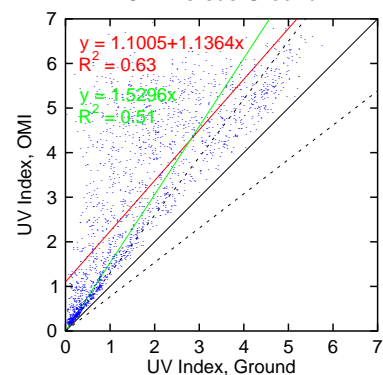

Ratio OMI / Ground

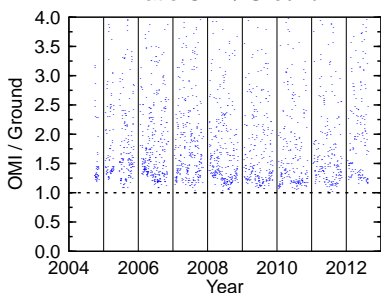

Ratio OMI / Ground

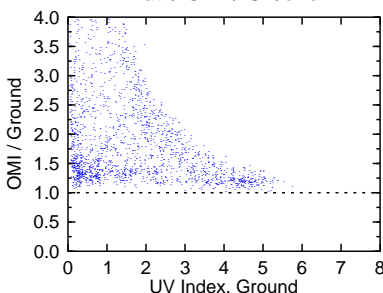

Ratio OMI / Ground

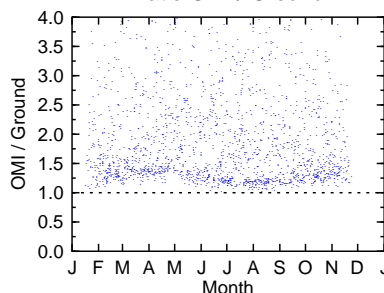

Ratio OMI / Ground

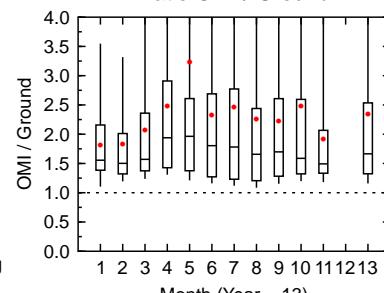

Difference OMI minus Ground

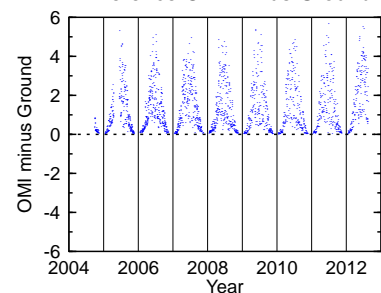

Difference OMI minus Ground

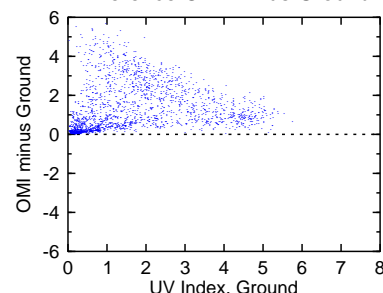

Difference OMI minus Ground

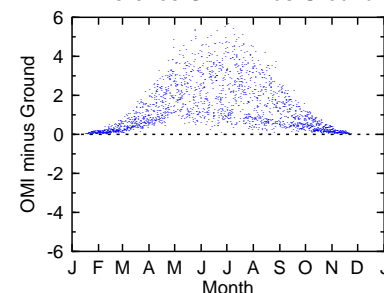

Difference OMI minus Ground

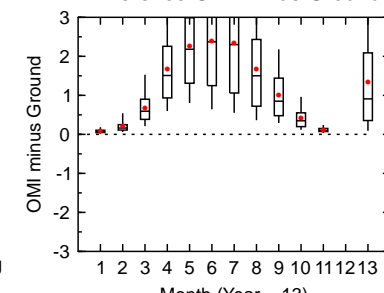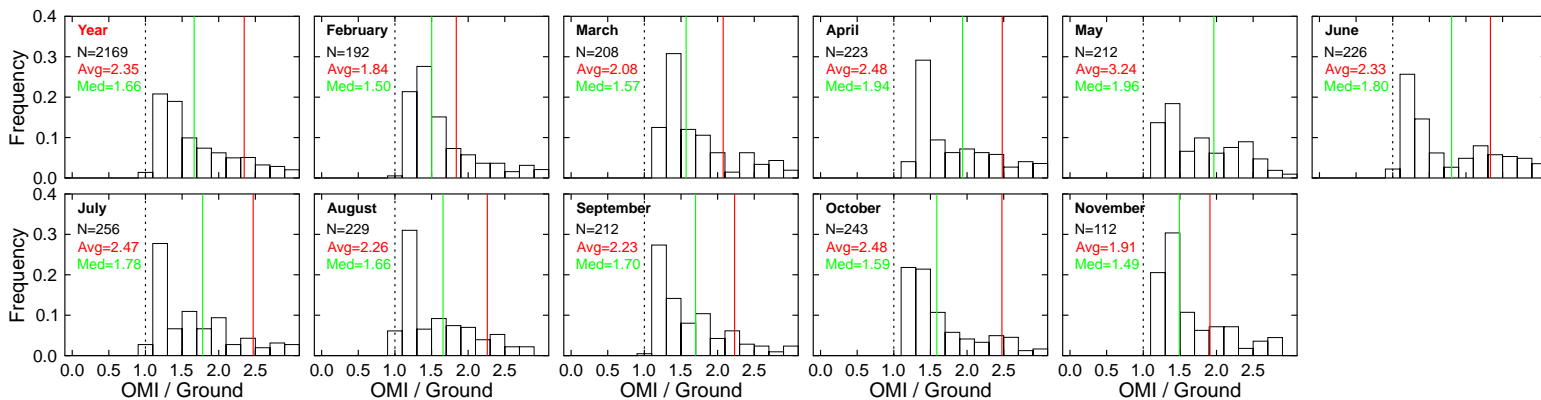

Supplement: Supplementary file 44 [file acp-15-7391-2015-supplement.zip]
