# Supplementary material for: Comparison of OMI UV observations with ground-based measurements at high northern latitudes
Source: Copernicus journal article supplement (doi:10.5194/acp-15-7391-2015), 2015-07-09

# Trondheim, Norway (63.42°N, 10.4°E)

## EDDose, all data

| Month     | N    | Minimum | 5%   | 25%  | Median | Average | 75%  | 95%  | Maximum | W10 | W20 | W30 |
|-----------|------|---------|------|------|--------|---------|------|------|---------|-----|-----|-----|
| January   | 198  | 0.34    | 1.02 | 1.40 | 1.77   | 2.04    | 2.40 | 3.86 | 8.35    | 6   | 13  | 20  |
| February  | 213  | 0.61    | 1.05 | 1.27 | 1.49   | 1.63    | 1.82 | 2.70 | 4.94    | 5   | 15  | 28  |
| March     | 239  | 0.62    | 1.08 | 1.31 | 1.49   | 1.63    | 1.85 | 2.57 | 3.36    | 5   | 10  | 23  |
| April     | 225  | 0.91    | 1.21 | 1.36 | 1.58   | 1.72    | 1.92 | 2.67 | 4.14    | 2   | 4   | 15  |
| May       | 211  | 0.89    | 1.13 | 1.27 | 1.43   | 1.50    | 1.63 | 2.09 | 4.73    | 3   | 14  | 30  |
| June      | 215  | 0.84    | 0.94 | 1.13 | 1.21   | 1.23    | 1.32 | 1.55 | 1.76    | 17  | 47  | 69  |
| July      | 239  | 0.79    | 0.95 | 1.07 | 1.14   | 1.18    | 1.22 | 1.55 | 2.99    | 29  | 70  | 83  |
| August    | 225  | 0.80    | 0.93 | 1.06 | 1.14   | 1.17    | 1.22 | 1.48 | 2.94    | 32  | 70  | 84  |
| September | 199  | 0.83    | 0.93 | 1.07 | 1.14   | 1.17    | 1.26 | 1.49 | 2.62    | 27  | 67  | 80  |
| October   | 239  | 0.61    | 0.96 | 1.15 | 1.24   | 1.29    | 1.37 | 1.76 | 2.91    | 13  | 36  | 62  |
| November  | 203  | 0.76    | 1.03 | 1.26 | 1.61   | 1.84    | 2.00 | 3.85 | 8.01    | 7   | 17  | 27  |
| December  | 127  | 0.34    | 1.05 | 1.48 | 1.95   | 2.23    | 2.59 | 4.03 | 11.88   | 3   | 6   | 11  |
| Year      | 2533 | 0.34    | 0.98 | 1.15 | 1.32   | 1.52    | 1.65 | 2.69 | 11.88   | 13  | 32  | 46  |

Erythemal Dose [kJ/m<sup>2</sup>] versus Time

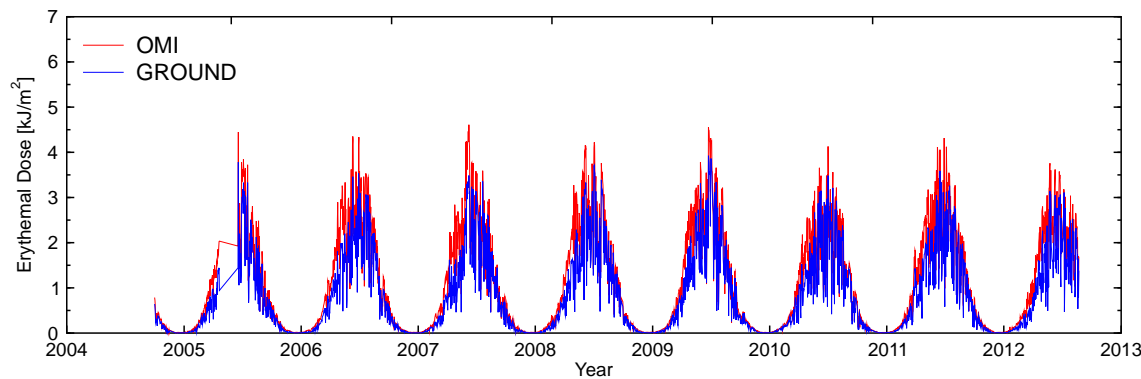

OMI versus Ground

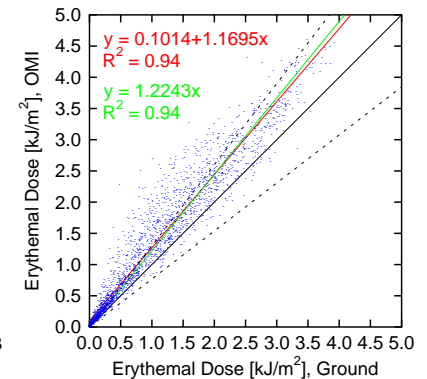

Ratio OMI / Ground

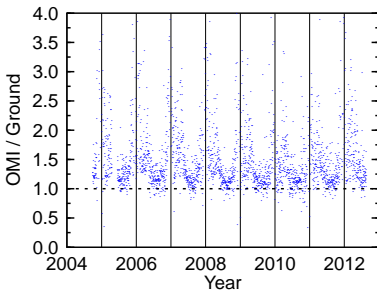

Ratio OMI / Ground

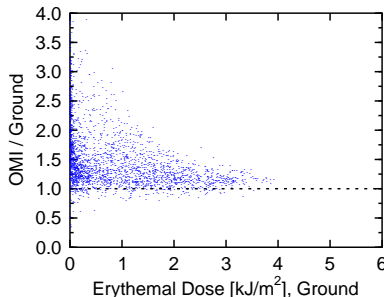

Ratio OMI / Ground

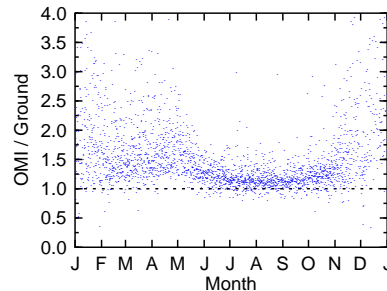

Ratio OMI / Ground

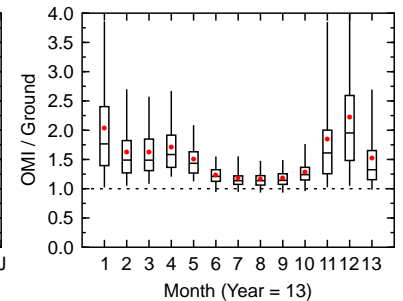

Difference OMI minus Ground

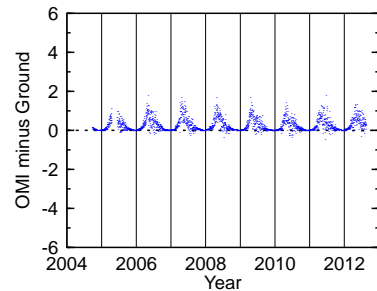

Difference OMI minus Ground

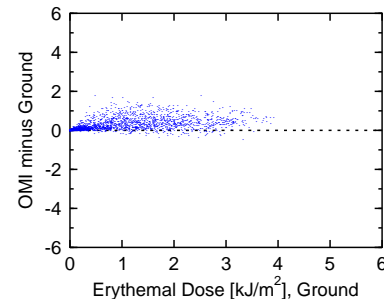

Difference OMI minus Ground

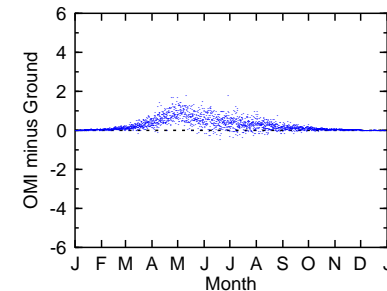

Difference OMI minus Ground

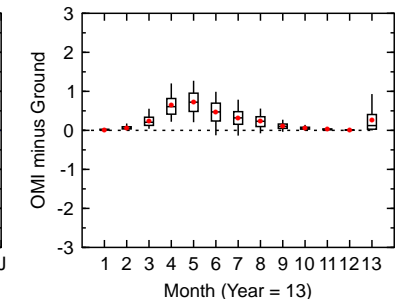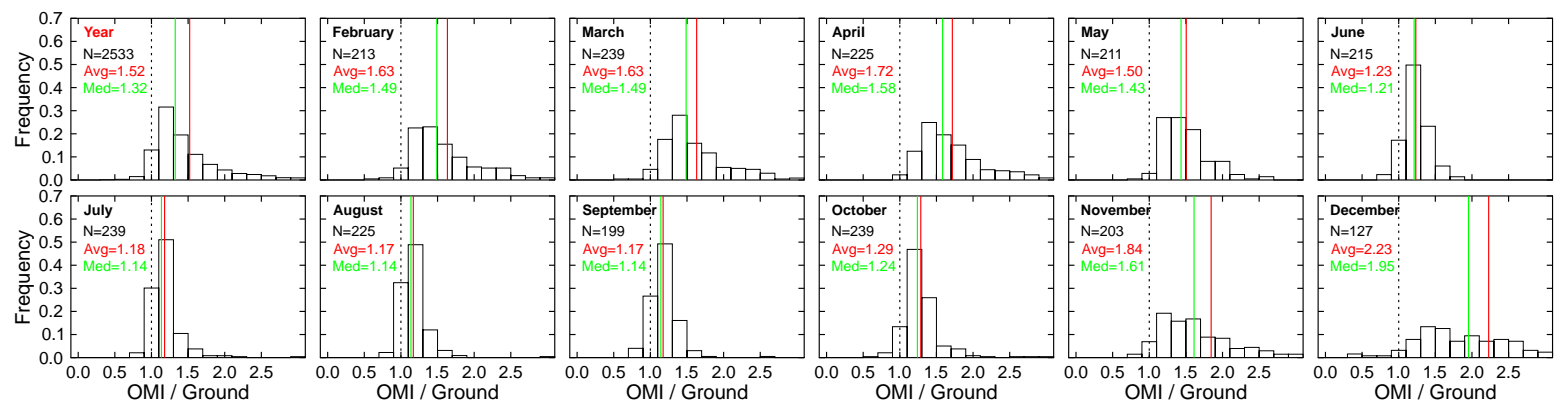

Supplement: Supplementary file 55 [file acp-15-7391-2015-supplement.zip]
