# Supplementary material for: Comparison of OMI UV observations with ground-based measurements at high northern latitudes
Source: Copernicus journal article supplement (doi:10.5194/acp-15-7391-2015), 2015-07-09

Andoya, Norway (69.28°N, 16.01°E)

EDDose, all data

| Month     | N    | Minimum | 5%   | 25%  | Median | Average | 75%  | 95%  | Maximum | W10 | W20 | W30 |
|-----------|------|---------|------|------|--------|---------|------|------|---------|-----|-----|-----|
| January   | 26   | 0.25    | 0.67 | 1.21 | 1.80   | 2.16    | 2.37 | 3.57 | 11.54   | 8   | 15  | 23  |
| February  | 194  | 0.52    | 0.80 | 0.96 | 1.14   | 1.30    | 1.49 | 2.39 | 2.88    | 29  | 46  | 62  |
| March     | 224  | 0.65    | 0.79 | 0.90 | 0.96   | 1.00    | 1.04 | 1.45 | 2.52    | 55  | 81  | 90  |
| April     | 211  | 0.59    | 0.83 | 0.93 | 1.03   | 1.10    | 1.19 | 1.64 | 2.92    | 49  | 72  | 82  |
| May       | 205  | 0.82    | 0.98 | 1.09 | 1.24   | 1.38    | 1.54 | 2.22 | 4.36    | 26  | 44  | 57  |
| June      | 194  | 0.91    | 1.01 | 1.11 | 1.30   | 1.43    | 1.60 | 2.21 | 3.44    | 22  | 38  | 50  |
| July      | 225  | 0.68    | 0.94 | 1.09 | 1.29   | 1.41    | 1.57 | 2.37 | 3.74    | 25  | 41  | 51  |
| August    | 217  | 0.59    | 1.00 | 1.08 | 1.22   | 1.34    | 1.53 | 2.11 | 3.42    | 26  | 45  | 60  |
| September | 201  | 0.81    | 1.01 | 1.12 | 1.28   | 1.49    | 1.51 | 2.84 | 5.12    | 17  | 36  | 51  |
| October   | 231  | 0.63    | 0.82 | 1.04 | 1.22   | 1.37    | 1.53 | 2.40 | 5.03    | 23  | 41  | 54  |
| November  | 111  | 0.73    | 1.01 | 1.43 | 1.86   | 2.25    | 2.49 | 5.07 | 7.90    | 5   | 8   | 20  |
| December  | 0    | 0.00    | 0.00 | 0.00 | 0.00   | 0.00    | 0.00 | 0.00 | 0.00    | 0   | 0   | 0   |
| Year      | 2039 | 0.25    | 0.85 | 1.03 | 1.19   | 1.37    | 1.51 | 2.40 | 11.54   | 29  | 47  | 59  |

Erythemal Dose [kJ/m<sup>2</sup>] versus Time

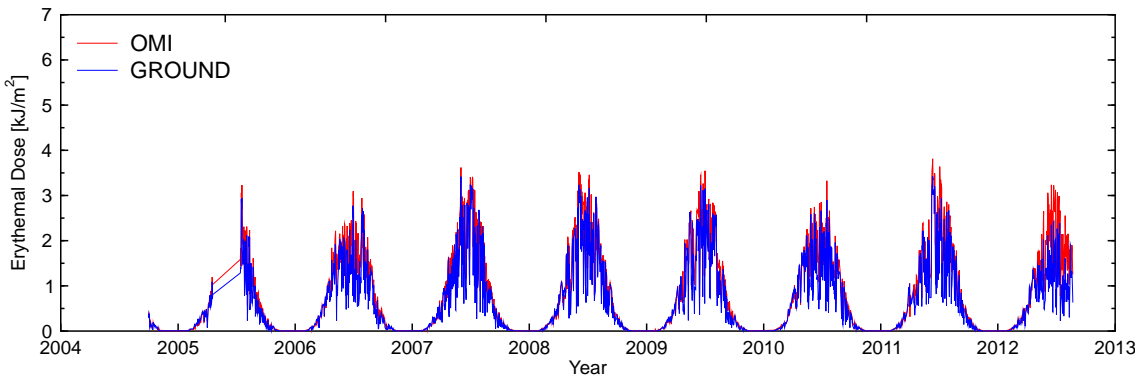

OMI versus Ground

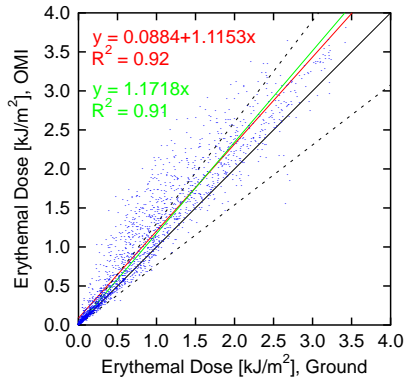

Ratio OMI / Ground

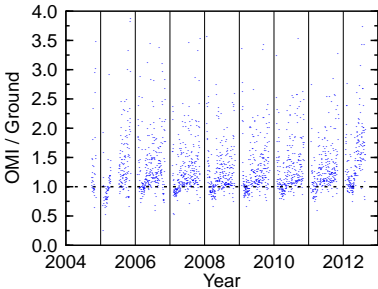

Ratio OMI / Ground

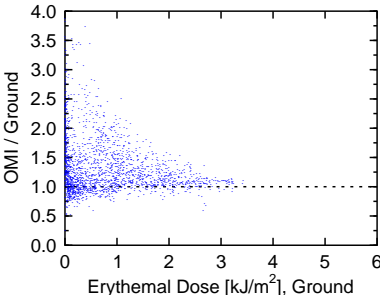

Ratio OMI / Ground

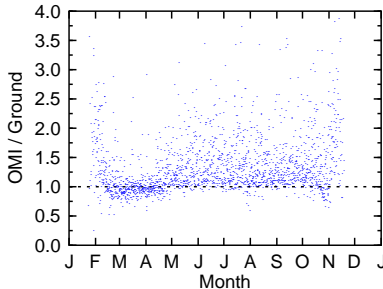

Ratio OMI / Ground

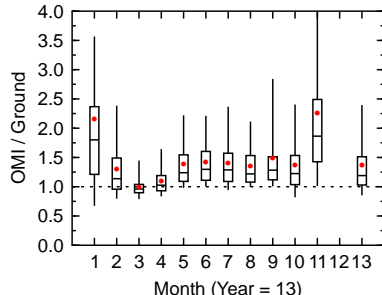

Difference OMI minus Ground

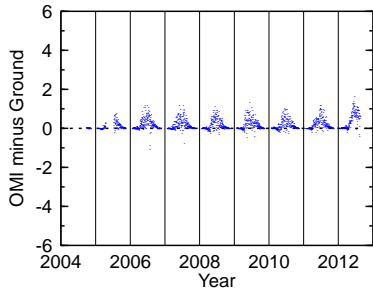

Difference OMI minus Ground

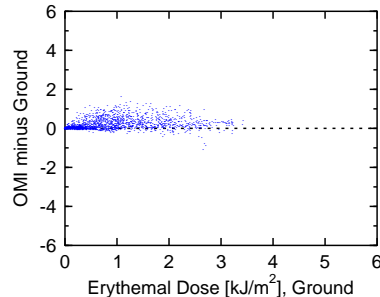

Difference OMI minus Ground

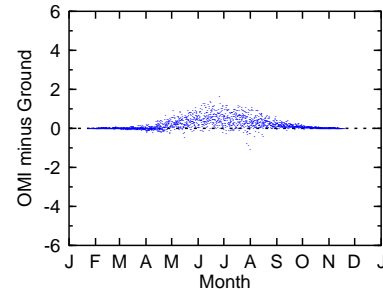

Difference OMI minus Ground

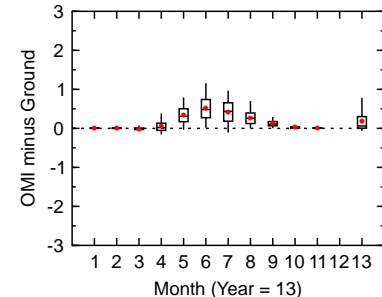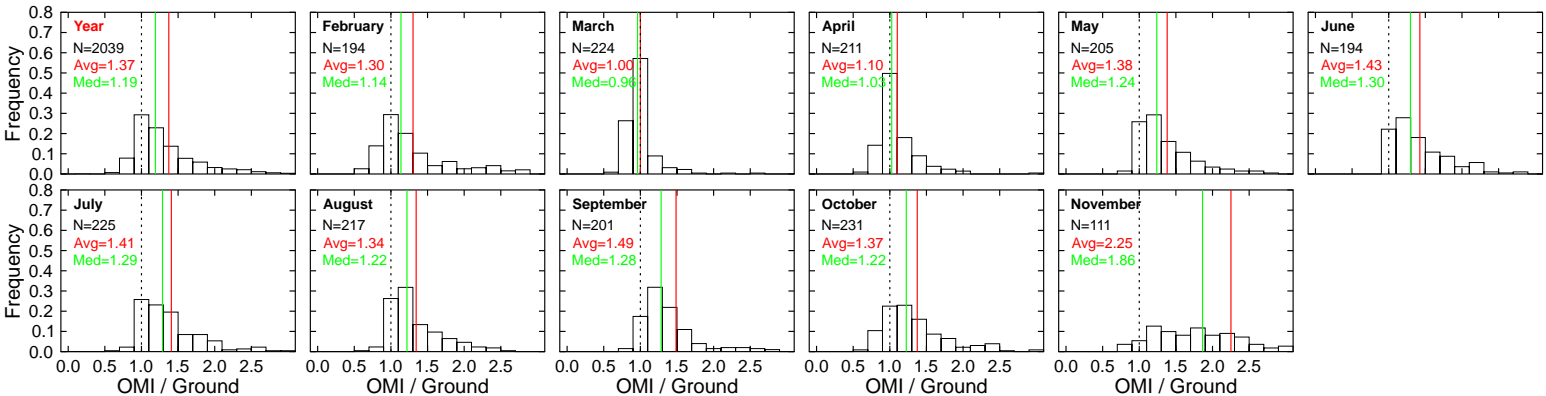

Supplement: Supplementary file 57 [file acp-15-7391-2015-supplement.zip]
