# Supplementary material for: Comparison of OMI UV observations with ground-based measurements at high northern latitudes
Source: Copernicus journal article supplement (doi:10.5194/acp-15-7391-2015), 2015-07-09

Oesteraas, Norway (59.95°N, 10.6°E)

CSEDRate (Ground at local solar noon), SZA less than 84, Dist less than 12 km

| Month     | N    | Minimum | 5%   | 25%  | Median | Average | 75%  | 95%   | Maximum | W10 | W20 | W30 |
|-----------|------|---------|------|------|--------|---------|------|-------|---------|-----|-----|-----|
| January   | 200  | 0.93    | 0.98 | 1.12 | 1.50   | 2.44    | 2.49 | 7.05  | 22.85   | 24  | 32  | 40  |
| February  | 209  | 0.90    | 0.98 | 1.10 | 1.36   | 1.99    | 1.89 | 6.05  | 17.52   | 24  | 38  | 44  |
| March     | 208  | 0.97    | 1.02 | 1.08 | 1.25   | 1.78    | 1.82 | 4.11  | 13.63   | 27  | 44  | 54  |
| April     | 197  | 0.98    | 1.07 | 1.13 | 1.36   | 2.51    | 2.59 | 6.96  | 37.87   | 11  | 41  | 49  |
| May       | 197  | 1.01    | 1.07 | 1.18 | 1.55   | 2.98    | 2.90 | 7.68  | 37.96   | 8   | 27  | 39  |
| June      | 209  | 1.02    | 1.10 | 1.21 | 1.53   | 3.12    | 2.45 | 10.79 | 52.50   | 5   | 23  | 41  |
| July      | 210  | 0.97    | 1.11 | 1.20 | 1.87   | 3.68    | 3.33 | 10.38 | 69.88   | 2   | 24  | 36  |
| August    | 197  | 1.04    | 1.10 | 1.19 | 1.66   | 3.17    | 2.47 | 10.32 | 75.27   | 5   | 25  | 36  |
| September | 172  | 1.00    | 1.11 | 1.18 | 1.55   | 2.81    | 2.72 | 7.75  | 23.63   | 3   | 31  | 39  |
| October   | 224  | 1.04    | 1.11 | 1.19 | 1.68   | 3.31    | 3.82 | 9.80  | 30.09   | 4   | 28  | 37  |
| November  | 198  | 0.98    | 1.07 | 1.14 | 1.37   | 3.25    | 2.80 | 14.07 | 24.98   | 13  | 33  | 46  |
| December  | 129  | 0.98    | 1.01 | 1.07 | 1.43   | 2.82    | 2.80 | 9.49  | 26.95   | 29  | 37  | 43  |
| Year      | 2350 | 0.90    | 1.04 | 1.16 | 1.49   | 2.82    | 2.60 | 8.90  | 75.27   | 12  | 32  | 42  |

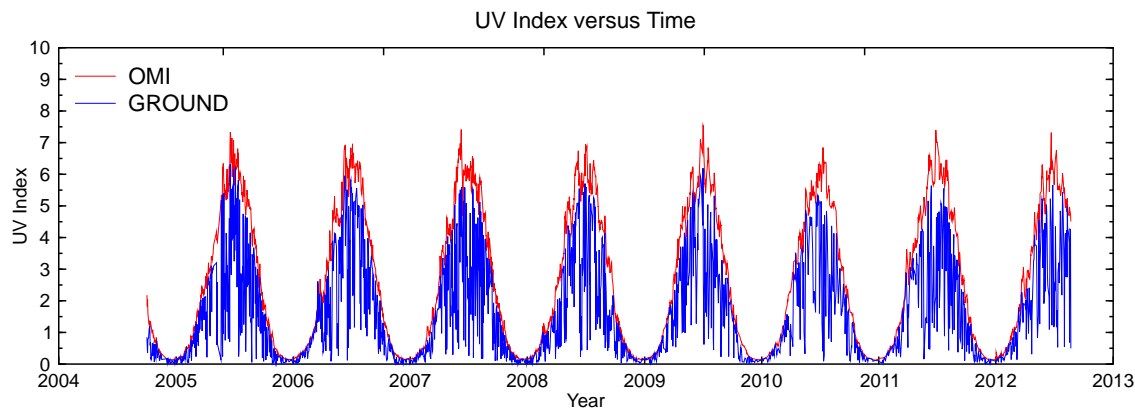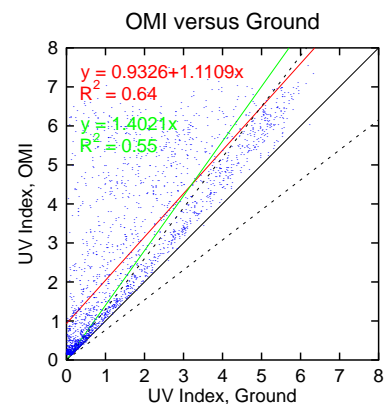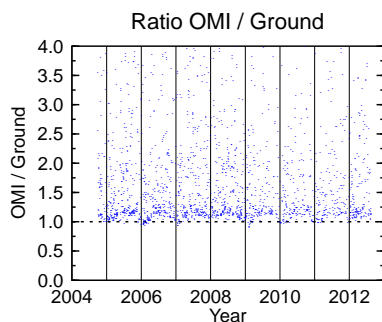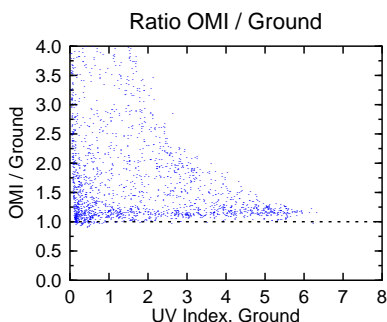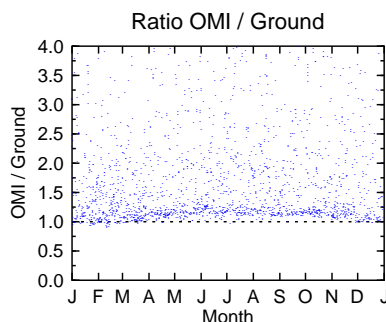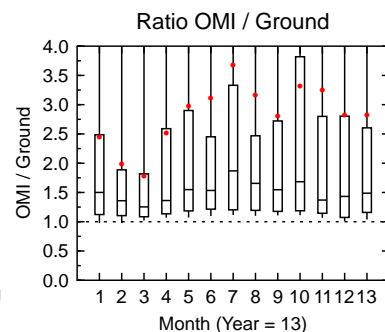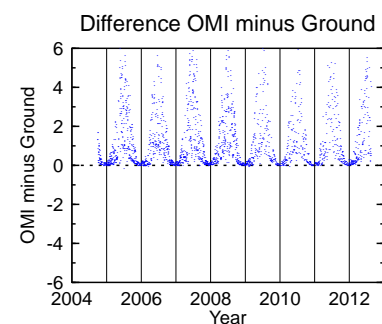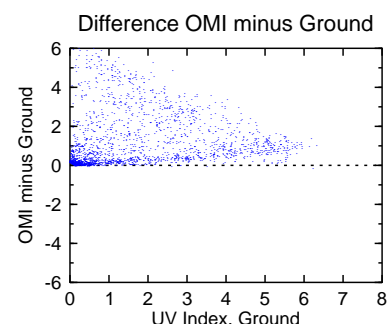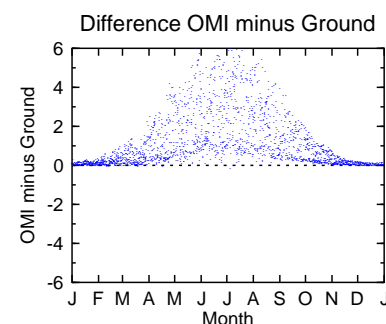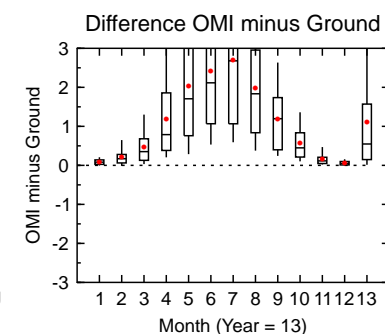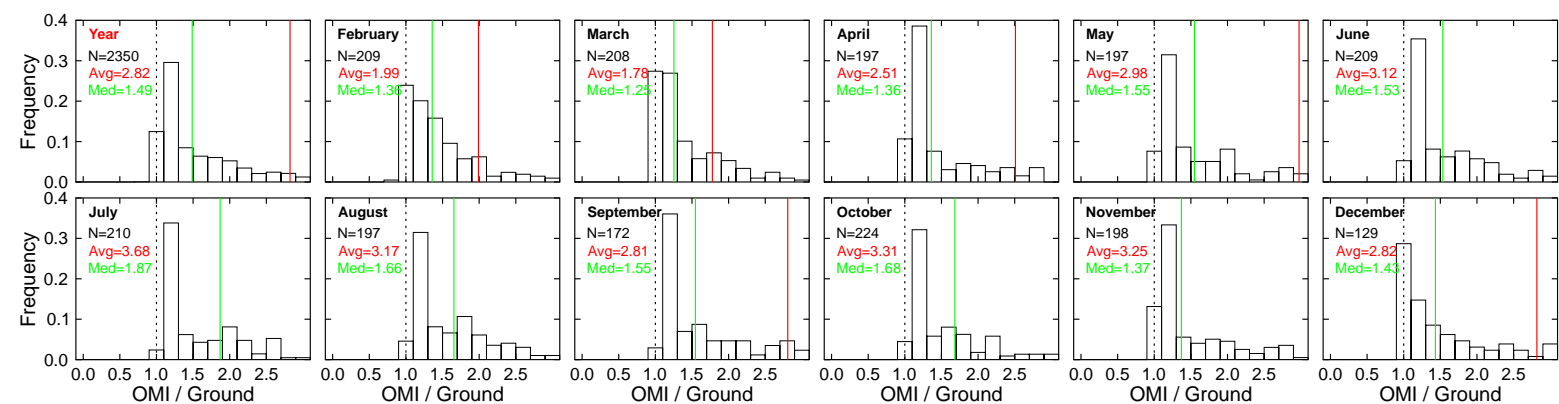

Supplement: Supplementary file 58 [file acp-15-7391-2015-supplement.zip]
