# Supplementary material for: Comparison of OMI UV observations with ground-based measurements at high northern latitudes
Source: Copernicus journal article supplement (doi:10.5194/acp-15-7391-2015), 2015-07-09

# Sodankyla, Finland (67.37°N, 26.63°E)

## CSEDDose, SZA less than 84, Dist less than 12 km

| Month     | N    | Minimum | 5%   | 25%  | Median | Average | 75%  | 95%  | Maximum | W10 | W20 | W30 |
|-----------|------|---------|------|------|--------|---------|------|------|---------|-----|-----|-----|
| January   | 0    | 0.00    | 0.00 | 0.00 | 0.00   | 0.00    | 0.00 | 0.00 | 0.00    | 0   | 0   | 0   |
| February  | 60   | 1.03    | 1.04 | 1.11 | 1.20   | 1.32    | 1.35 | 2.33 | 2.75    | 22  | 50  | 72  |
| March     | 116  | 1.05    | 1.09 | 1.16 | 1.22   | 1.41    | 1.49 | 2.14 | 4.26    | 9   | 46  | 56  |
| April     | 122  | 1.07    | 1.09 | 1.15 | 1.26   | 1.49    | 1.54 | 2.65 | 4.95    | 8   | 39  | 58  |
| May       | 129  | 1.05    | 1.15 | 1.29 | 1.62   | 1.98    | 2.29 | 4.04 | 6.95    | 3   | 16  | 26  |
| June      | 125  | 1.06    | 1.12 | 1.34 | 1.56   | 1.81    | 2.01 | 3.34 | 6.66    | 2   | 13  | 23  |
| July      | 144  | 1.09    | 1.12 | 1.29 | 1.53   | 1.87    | 2.19 | 4.71 | 5.69    | 1   | 15  | 26  |
| August    | 136  | 1.09    | 1.12 | 1.26 | 1.46   | 1.66    | 1.79 | 2.95 | 4.15    | 1   | 17  | 29  |
| September | 122  | 1.12    | 1.16 | 1.29 | 1.70   | 2.16    | 2.55 | 4.73 | 8.24    | 0   | 13  | 27  |
| October   | 147  | 1.00    | 1.08 | 1.29 | 1.69   | 2.05    | 2.38 | 4.93 | 6.13    | 6   | 16  | 27  |
| November  | 26   | 0.99    | 1.03 | 1.13 | 1.36   | 2.14    | 2.06 | 6.47 | 9.32    | 19  | 31  | 38  |
| December  | 0    | 0.00    | 0.00 | 0.00 | 0.00   | 0.00    | 0.00 | 0.00 | 0.00    | 0   | 0   | 0   |
| Year      | 1127 | 0.99    | 1.10 | 1.22 | 1.47   | 1.79    | 2.01 | 3.67 | 9.32    | 5   | 23  | 36  |

Erythemal Dose [kJ/m<sup>2</sup>] versus Time

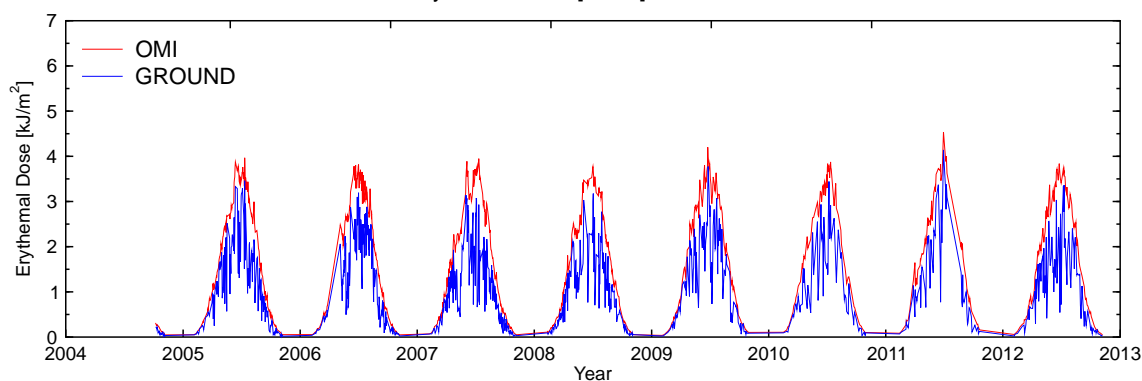

OMI versus Ground

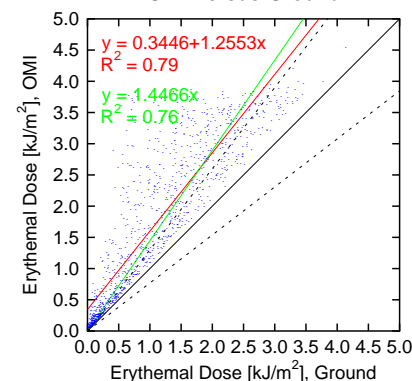

Ratio OMI / Ground

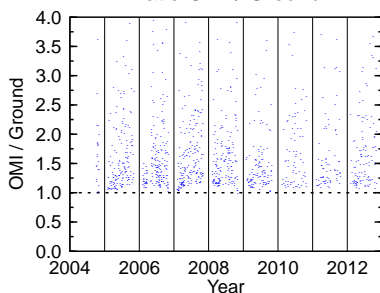

Ratio OMI / Ground

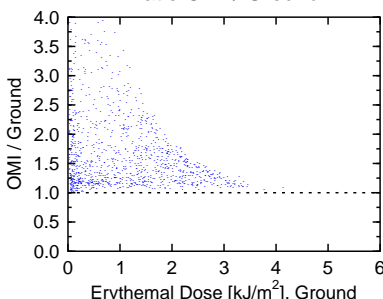

Ratio OMI / Ground

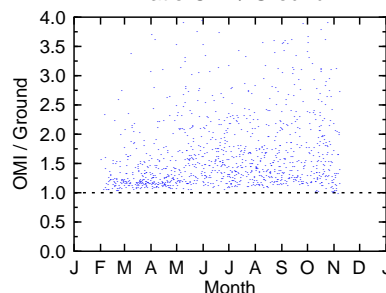

Ratio OMI / Ground

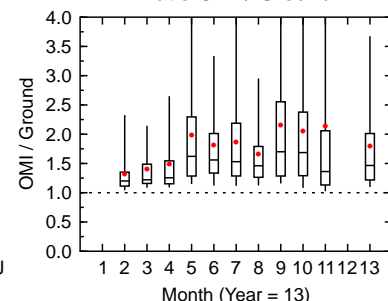

Difference OMI minus Ground

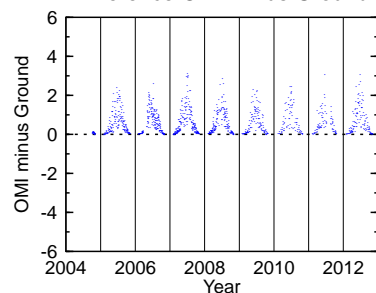

Difference OMI minus Ground

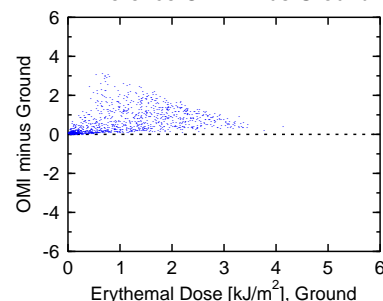

Difference OMI minus Ground

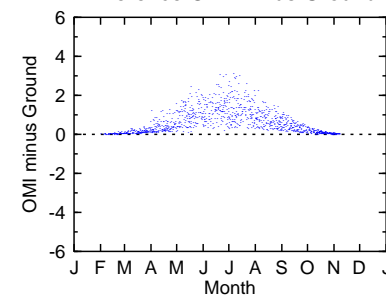

Difference OMI minus Ground

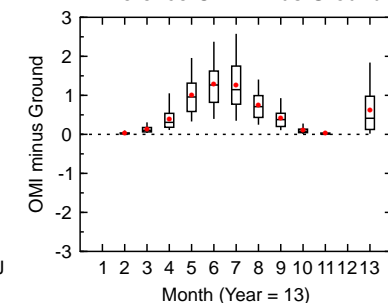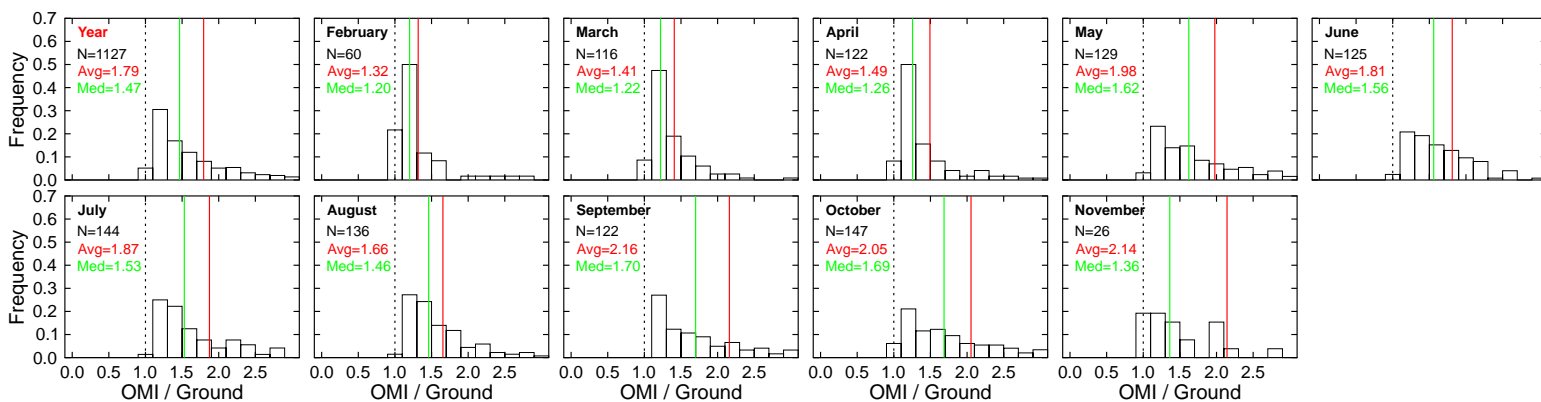

Supplement: Supplementary file 59 [file acp-15-7391-2015-supplement.zip]
