# Supplementary material for: Comparison of OMI UV observations with ground-based measurements at high northern latitudes
Source: Copernicus journal article supplement (doi:10.5194/acp-15-7391-2015), 2015-07-09

Jokioinen, Finland (60.82°N, 23.5°E)

CSEDRate (Ground at local solar noon), SZA less than 84, Dist less than 12 km

| Month     | N    | Minimum | 5%   | 25%  | Median | Average | 75%  | 95%  | Maximum | W10 | W20 | W30 |
|-----------|------|---------|------|------|--------|---------|------|------|---------|-----|-----|-----|
| January   | 152  | 0.87    | 0.91 | 1.07 | 1.37   | 2.02    | 2.22 | 5.84 | 10.41   | 26  | 40  | 46  |
| February  | 164  | 0.90    | 0.94 | 1.04 | 1.34   | 1.74    | 2.11 | 3.74 | 5.86    | 32  | 41  | 48  |
| March     | 149  | 0.90    | 0.96 | 1.05 | 1.26   | 1.56    | 1.95 | 2.81 | 7.05    | 34  | 44  | 52  |
| April     | 180  | 1.00    | 1.08 | 1.13 | 1.51   | 2.04    | 2.02 | 4.10 | 14.43   | 10  | 35  | 44  |
| May       | 215  | 1.01    | 1.08 | 1.12 | 1.31   | 2.11    | 2.13 | 5.38 | 37.26   | 12  | 41  | 50  |
| June      | 203  | 0.99    | 1.05 | 1.11 | 1.42   | 2.09    | 2.29 | 4.76 | 17.08   | 20  | 42  | 44  |
| July      | 217  | 0.99    | 1.05 | 1.11 | 1.38   | 1.82    | 2.11 | 3.98 | 7.39    | 16  | 40  | 47  |
| August    | 209  | 1.02    | 1.06 | 1.19 | 1.57   | 2.76    | 2.42 | 5.74 | 74.87   | 15  | 26  | 33  |
| September | 173  | 1.04    | 1.08 | 1.18 | 1.59   | 2.31    | 2.62 | 6.39 | 23.45   | 9   | 27  | 34  |
| October   | 208  | 1.07    | 1.10 | 1.20 | 1.80   | 2.51    | 3.32 | 6.31 | 11.38   | 4   | 26  | 35  |
| November  | 142  | 0.90    | 0.95 | 1.23 | 1.89   | 2.64    | 3.46 | 6.73 | 12.67   | 15  | 23  | 27  |
| December  | 49   | 0.94    | 1.00 | 1.20 | 1.71   | 2.38    | 2.58 | 7.13 | 14.66   | 10  | 24  | 31  |
| Year      | 2061 | 0.87    | 1.01 | 1.13 | 1.50   | 2.16    | 2.30 | 5.35 | 74.87   | 17  | 35  | 42  |

UV Index versus Time

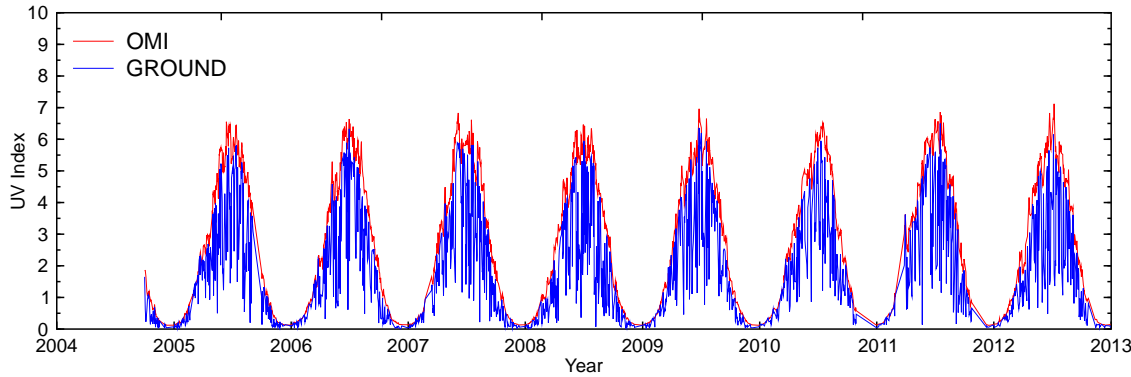

OMI versus Ground

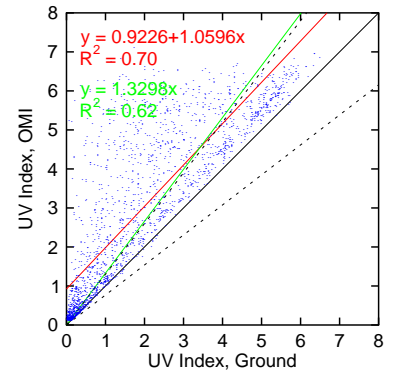

Ratio OMI / Ground

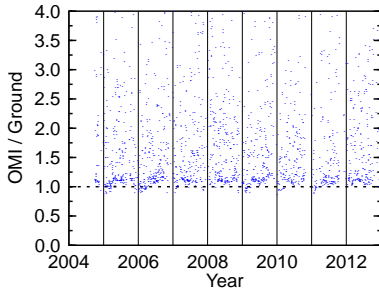

Ratio OMI / Ground

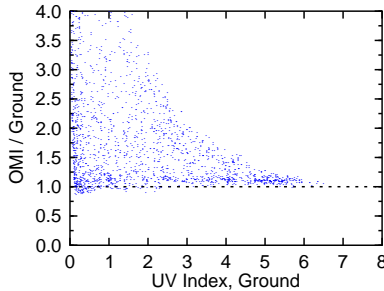

Ratio OMI / Ground

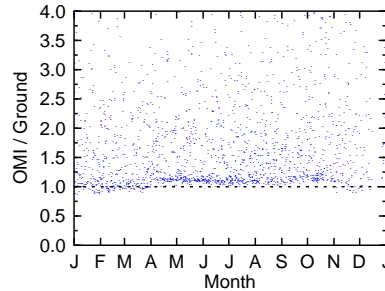

Ratio OMI / Ground

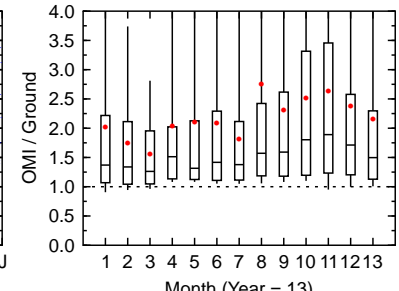

Difference OMI minus Ground

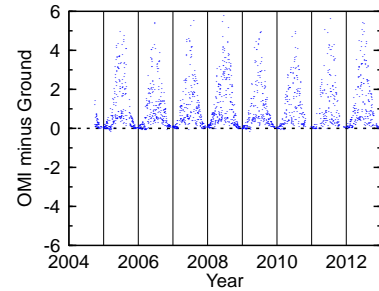

Difference OMI minus Ground

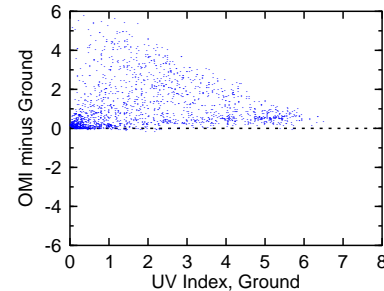

Difference OMI minus Ground

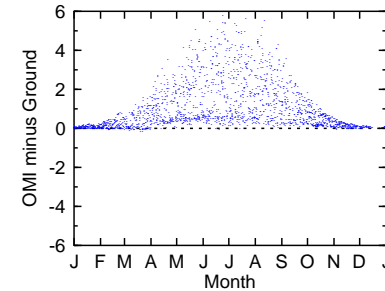

Difference OMI minus Ground

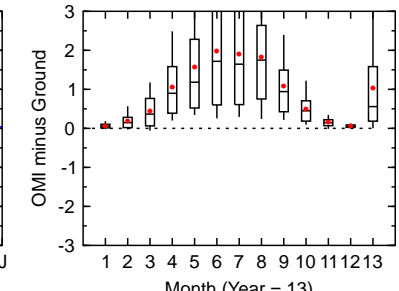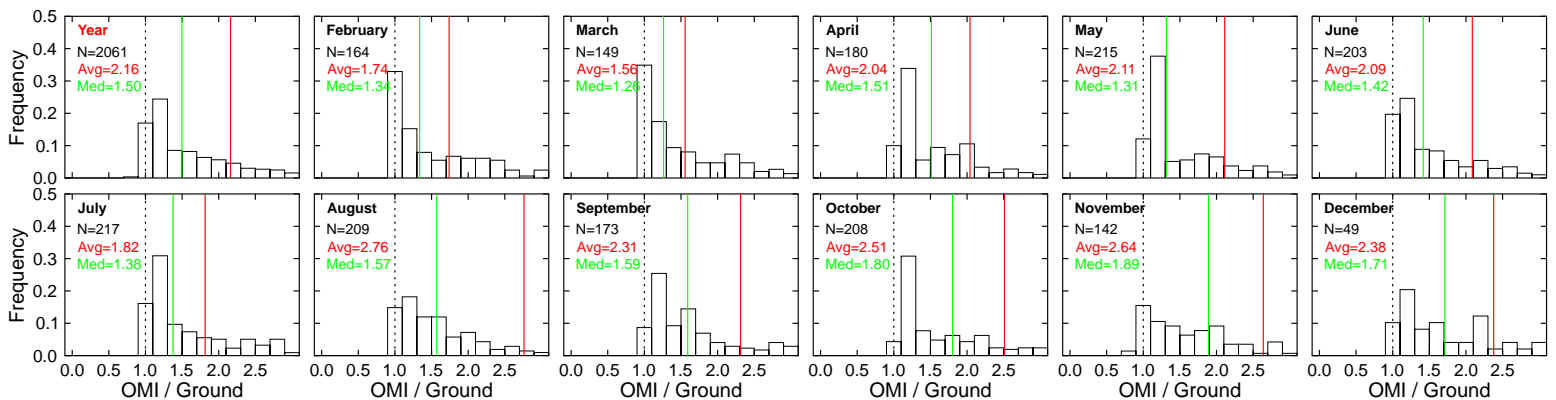

Supplement: Supplementary file 65 [file acp-15-7391-2015-supplement.zip]
