# Supplementary material for: Comparison of OMI UV observations with ground-based measurements at high northern latitudes
Source: Copernicus journal article supplement (doi:10.5194/acp-15-7391-2015), 2015-07-09

# Ny-Alesund, Svalbard (78.92°N, 11.92°E)

## OPEDRate, SZA less than 84, Dist less than 12 km

| Month     | N    | Minimum | 5%   | 25%  | Median | Average | 75%  | 95%  | Maximum | W10 | W20 | W30 |
|-----------|------|---------|------|------|--------|---------|------|------|---------|-----|-----|-----|
| January   | 0    | 0.00    | 0.00 | 0.00 | 0.00   | 0.00    | 0.00 | 0.00 | 0.00    | 0   | 0   | 0   |
| February  | 0    | 0.00    | 0.00 | 0.00 | 0.00   | 0.00    | 0.00 | 0.00 | 0.00    | 0   | 0   | 0   |
| March     | 279  | 0.24    | 0.33 | 0.48 | 0.65   | 0.65    | 0.79 | 1.06 | 1.20    | 7   | 19  | 27  |
| April     | 494  | 0.13    | 0.28 | 0.49 | 0.60   | 0.61    | 0.73 | 0.90 | 1.22    | 4   | 11  | 19  |
| May       | 439  | 0.15    | 0.44 | 0.54 | 0.62   | 0.65    | 0.72 | 0.97 | 1.48    | 6   | 12  | 18  |
| June      | 413  | 0.41    | 0.57 | 0.70 | 0.82   | 0.86    | 0.97 | 1.29 | 2.02    | 23  | 39  | 57  |
| July      | 469  | 0.55    | 0.78 | 0.91 | 1.03   | 1.08    | 1.19 | 1.64 | 2.66    | 38  | 63  | 81  |
| August    | 467  | 0.48    | 0.75 | 0.92 | 1.05   | 1.10    | 1.23 | 1.65 | 2.51    | 36  | 60  | 75  |
| September | 413  | 0.34    | 0.51 | 0.71 | 0.87   | 0.90    | 1.06 | 1.38 | 1.90    | 23  | 43  | 59  |
| October   | 30   | 0.42    | 0.44 | 0.53 | 0.64   | 0.70    | 0.78 | 1.22 | 1.37    | 0   | 10  | 23  |
| November  | 0    | 0.00    | 0.00 | 0.00 | 0.00   | 0.00    | 0.00 | 0.00 | 0.00    | 0   | 0   | 0   |
| December  | 0    | 0.00    | 0.00 | 0.00 | 0.00   | 0.00    | 0.00 | 0.00 | 0.00    | 0   | 0   | 0   |
| Year      | 3004 | 0.13    | 0.43 | 0.62 | 0.82   | 0.85    | 1.02 | 1.38 | 2.66    | 20  | 36  | 49  |

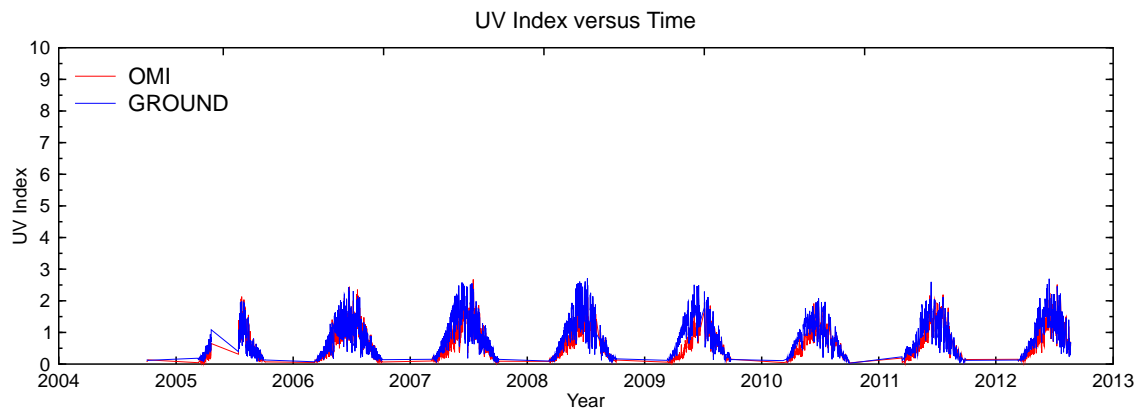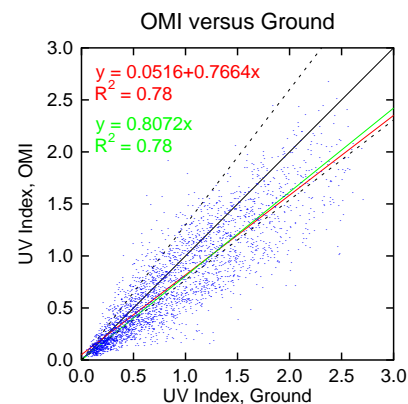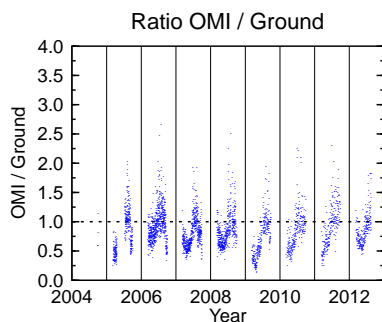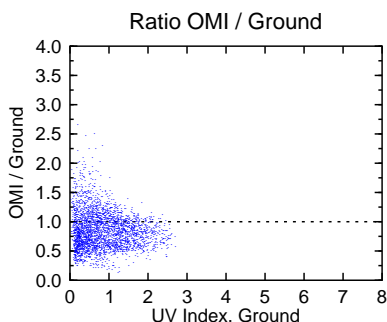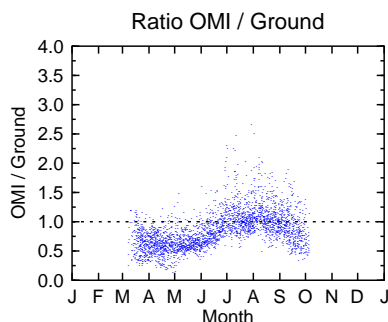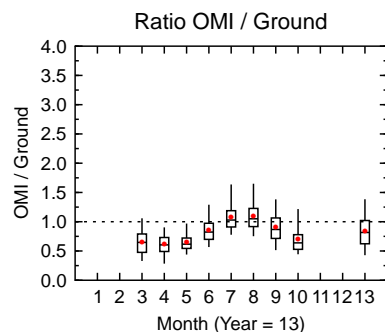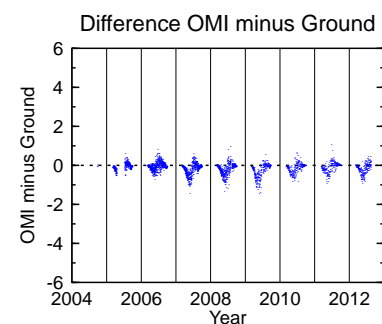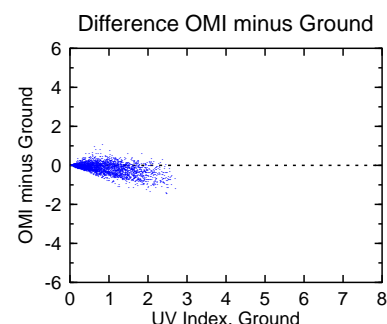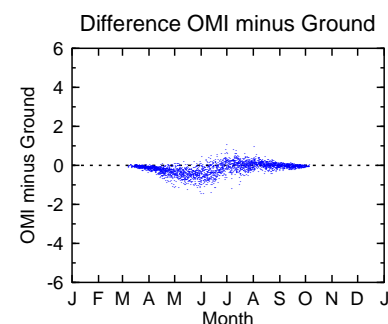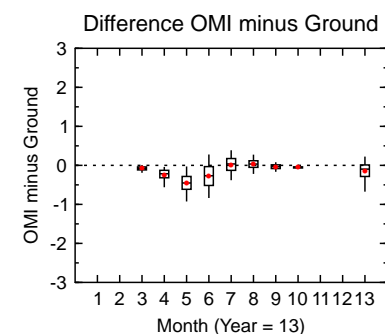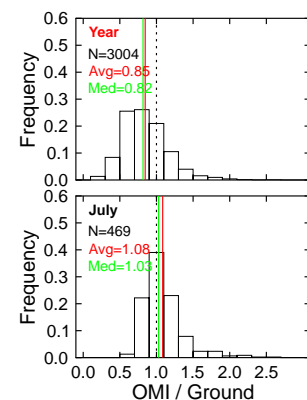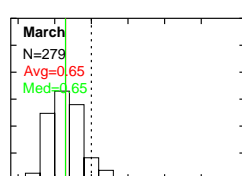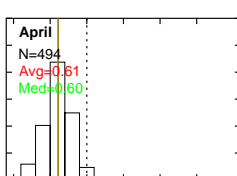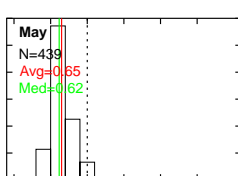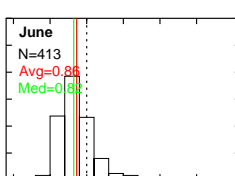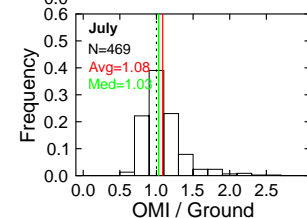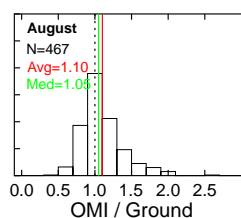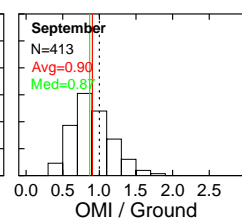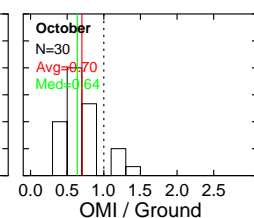

Supplement: Supplementary file 28 [file acp-15-7391-2015-supplement.zip]
