# Supplementary material for: Comparison of OMI UV observations with ground-based measurements at high northern latitudes
Source: Copernicus journal article supplement (doi:10.5194/acp-15-7391-2015), 2015-07-09

Summit, Greenland (72.58°N, 38.46°E)  
EDDose, SZA less than 84, Dist less than 12 km

| Month     | N    | Minimum | 5%   | 25%  | Median | Average | 75%  | 95%  | Maximum | W10 | W20 | W30 |
|-----------|------|---------|------|------|--------|---------|------|------|---------|-----|-----|-----|
| January   | 0    | 0.00    | 0.00 | 0.00 | 0.00   | 0.00    | 0.00 | 0.00 | 0.00    | 0   | 0   | 0   |
| February  | 47   | 0.77    | 0.81 | 0.87 | 0.90   | 0.91    | 0.98 | 1.02 | 1.07    | 49  | 87  | 100 |
| March     | 155  | 0.89    | 0.92 | 0.96 | 0.99   | 0.99    | 1.02 | 1.06 | 1.12    | 98  | 100 | 100 |
| April     | 153  | 0.98    | 0.99 | 1.01 | 1.04   | 1.05    | 1.07 | 1.12 | 1.20    | 87  | 99  | 100 |
| May       | 165  | 0.99    | 1.01 | 1.04 | 1.06   | 1.06    | 1.08 | 1.11 | 1.15    | 92  | 100 | 100 |
| June      | 147  | 1.03    | 1.04 | 1.06 | 1.08   | 1.08    | 1.10 | 1.14 | 1.17    | 73  | 100 | 100 |
| July      | 128  | 1.03    | 1.06 | 1.08 | 1.11   | 1.11    | 1.14 | 1.19 | 1.23    | 44  | 96  | 100 |
| August    | 185  | 1.05    | 1.06 | 1.09 | 1.13   | 1.13    | 1.17 | 1.22 | 1.30    | 28  | 91  | 100 |
| September | 181  | 1.02    | 1.05 | 1.10 | 1.14   | 1.14    | 1.17 | 1.21 | 1.28    | 27  | 88  | 100 |
| October   | 122  | 0.93    | 0.97 | 1.03 | 1.07   | 1.07    | 1.11 | 1.17 | 1.23    | 68  | 98  | 100 |
| November  | 0    | 0.00    | 0.00 | 0.00 | 0.00   | 0.00    | 0.00 | 0.00 | 0.00    | 0   | 0   | 0   |
| December  | 0    | 0.00    | 0.00 | 0.00 | 0.00   | 0.00    | 0.00 | 0.00 | 0.00    | 0   | 0   | 0   |
| Year      | 1283 | 0.77    | 0.95 | 1.03 | 1.08   | 1.07    | 1.12 | 1.19 | 1.30    | 63  | 96  | 100 |

Erythemal Dose [kJ/m<sup>2</sup>] versus Time

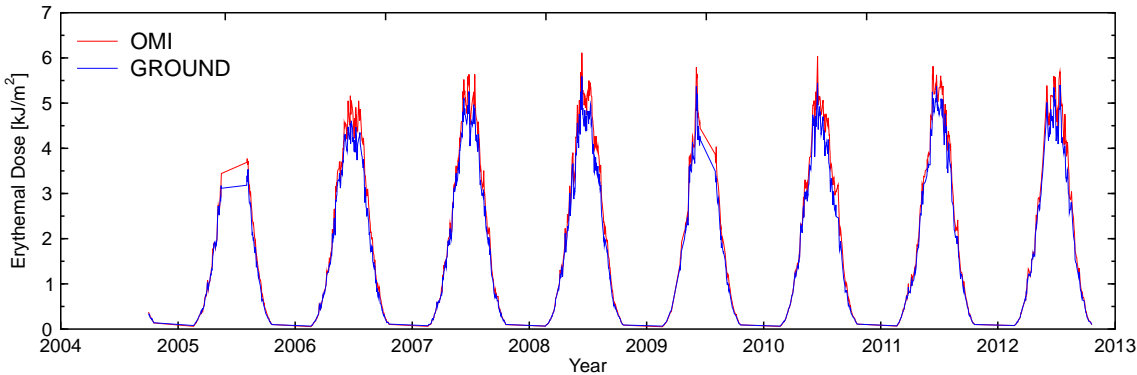

OMI versus Ground

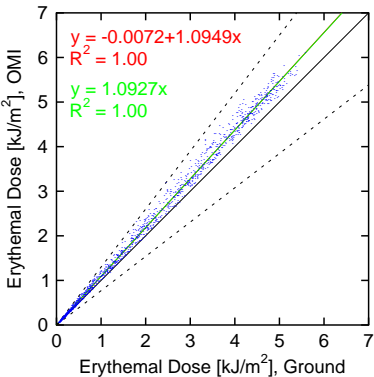

Ratio OMI / Ground

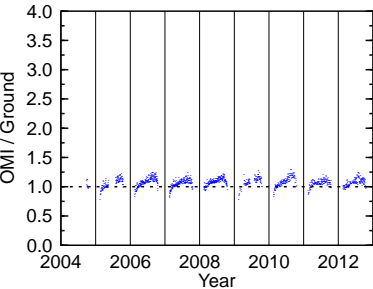

Ratio OMI / Ground

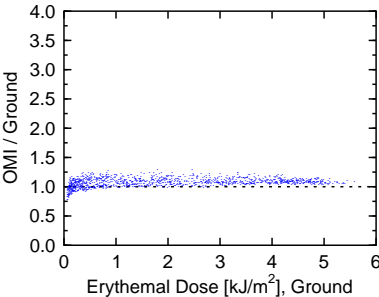

Ratio OMI / Ground

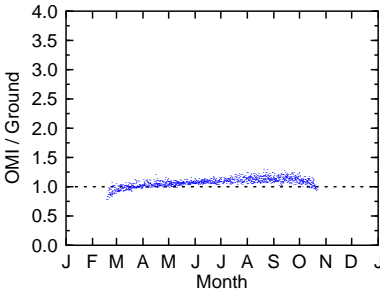

Ratio OMI / Ground

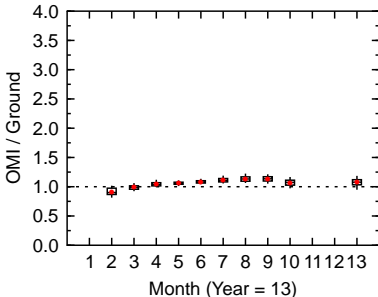

Difference OMI minus Ground

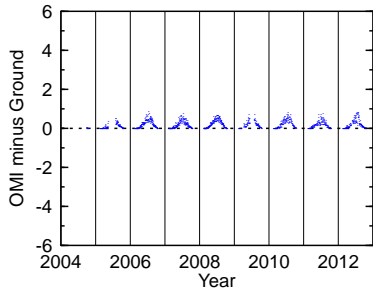

Difference OMI minus Ground

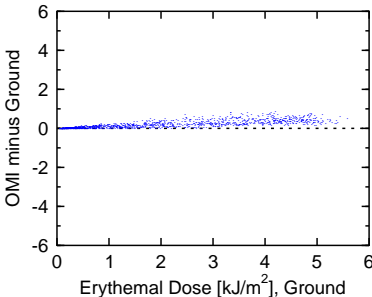

Difference OMI minus Ground

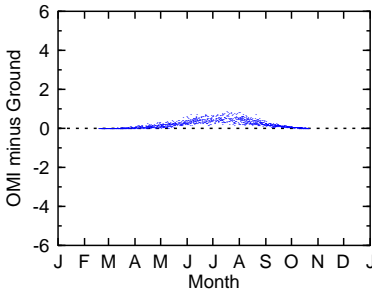

Difference OMI minus Ground

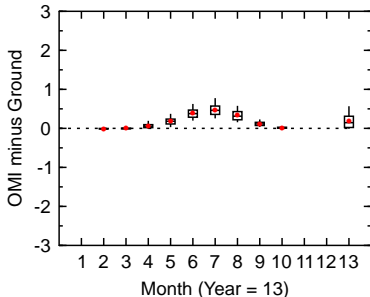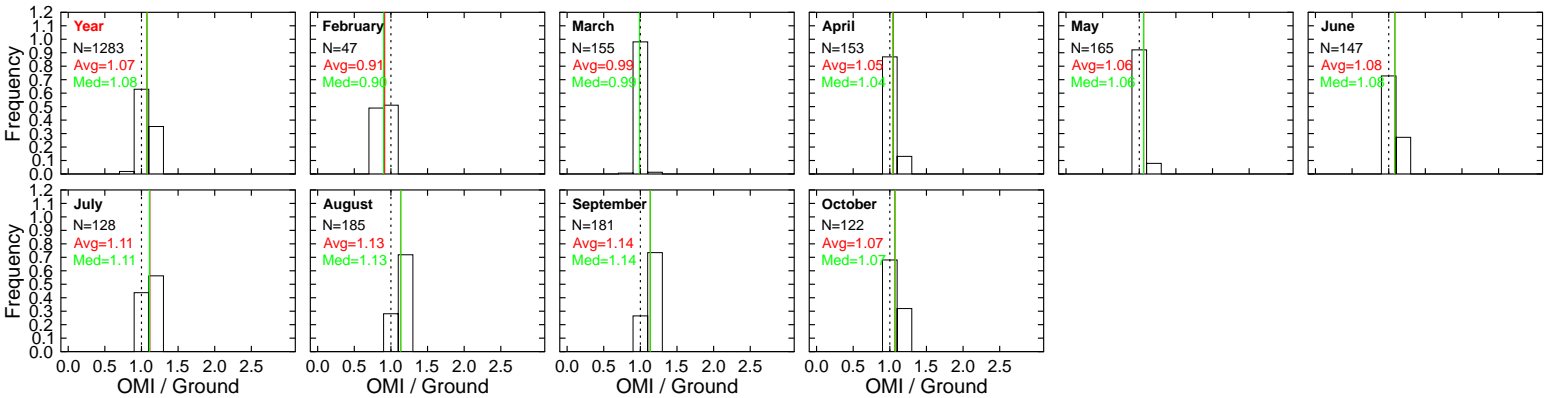

Supplement: Supplementary file 47 [file acp-15-7391-2015-supplement.zip]
