# Supplementary material for: Comparison of OMI UV observations with ground-based measurements at high northern latitudes
Source: Copernicus journal article supplement (doi:10.5194/acp-15-7391-2015), 2015-07-09

Blindern, Norway (59.94°N, 10.72°E)

OPEDRate, SZA less than 84, Dist less than 12 km

| Month     | N    | Minimum | 5%   | 25%  | Median | Average | 75%  | 95%  | Maximum | W10 | W20 | W30 |
|-----------|------|---------|------|------|--------|---------|------|------|---------|-----|-----|-----|
| January   | 202  | 0.59    | 0.78 | 0.99 | 1.12   | 1.33    | 1.39 | 2.70 | 5.43    | 26  | 53  | 66  |
| February  | 205  | 0.50    | 0.72 | 0.84 | 0.95   | 1.10    | 1.15 | 1.78 | 5.91    | 30  | 55  | 74  |
| March     | 208  | 0.60    | 0.72 | 0.91 | 1.06   | 1.12    | 1.20 | 1.92 | 3.01    | 33  | 64  | 73  |
| April     | 200  | 0.51    | 0.78 | 1.02 | 1.12   | 1.31    | 1.38 | 2.65 | 6.06    | 37  | 58  | 66  |
| May       | 178  | 0.59    | 0.74 | 0.97 | 1.11   | 1.33    | 1.43 | 2.47 | 7.29    | 30  | 54  | 64  |
| June      | 200  | 0.61    | 0.82 | 1.01 | 1.12   | 1.28    | 1.38 | 2.36 | 4.87    | 30  | 59  | 70  |
| July      | 211  | 0.65    | 0.76 | 0.99 | 1.08   | 1.39    | 1.35 | 2.28 | 24.24   | 42  | 57  | 66  |
| August    | 199  | 0.49    | 0.84 | 1.00 | 1.16   | 1.44    | 1.54 | 3.36 | 6.77    | 31  | 49  | 60  |
| September | 174  | 0.52    | 0.78 | 0.97 | 1.05   | 1.25    | 1.27 | 2.42 | 5.01    | 40  | 62  | 71  |
| October   | 224  | 0.50    | 0.77 | 1.01 | 1.11   | 1.36    | 1.35 | 2.72 | 7.73    | 34  | 58  | 67  |
| November  | 200  | 0.65    | 0.79 | 0.98 | 1.10   | 1.43    | 1.41 | 3.33 | 6.84    | 34  | 62  | 68  |
| December  | 132  | 0.49    | 0.74 | 0.89 | 1.04   | 1.26    | 1.24 | 3.07 | 5.20    | 30  | 53  | 67  |
| Year      | 2333 | 0.49    | 0.77 | 0.97 | 1.10   | 1.30    | 1.33 | 2.55 | 24.24   | 33  | 57  | 68  |

UV Index versus Time

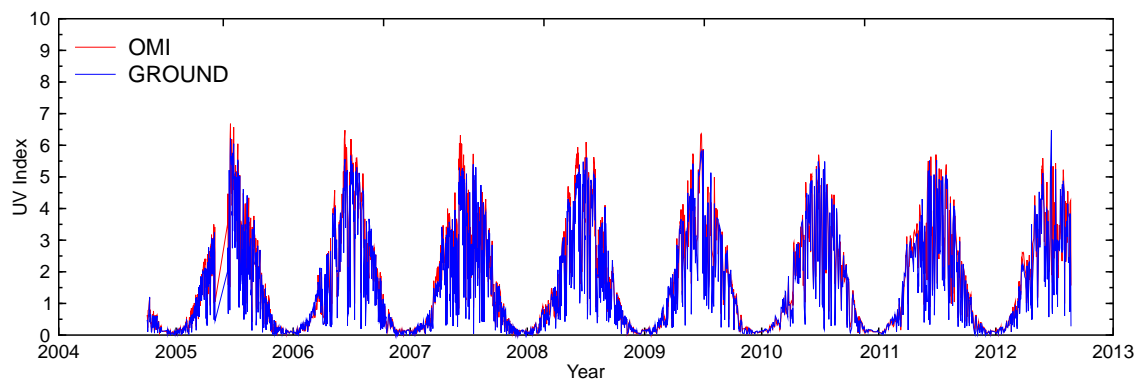

OMI versus Ground

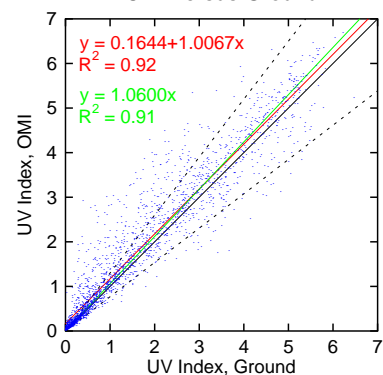

Ratio OMI / Ground

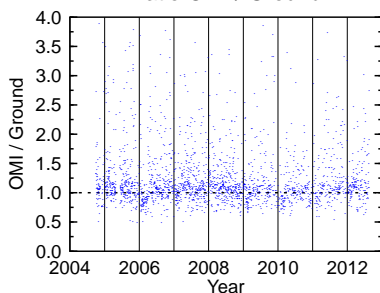

Ratio OMI / Ground

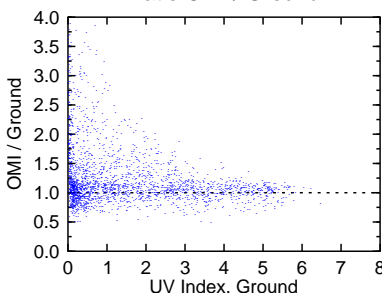

Ratio OMI / Ground

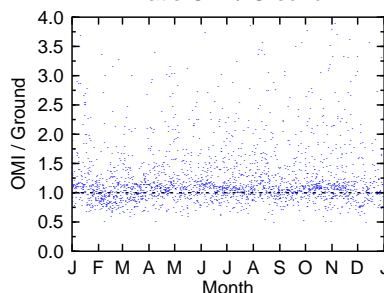

Ratio OMI / Ground

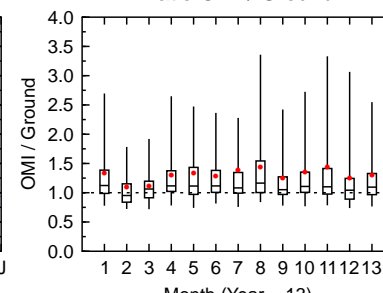

Difference OMI minus Ground

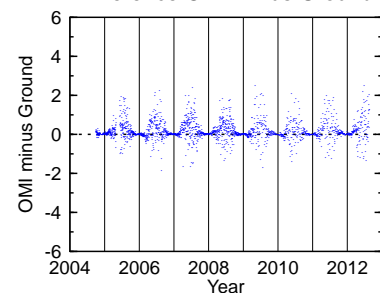

Difference OMI minus Ground

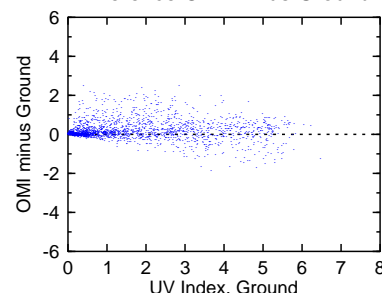

Difference OMI minus Ground

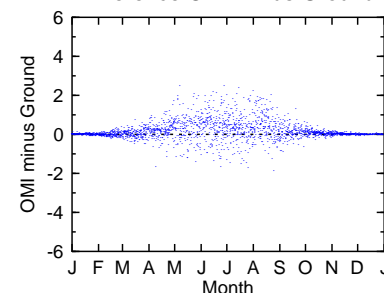

Difference OMI minus Ground

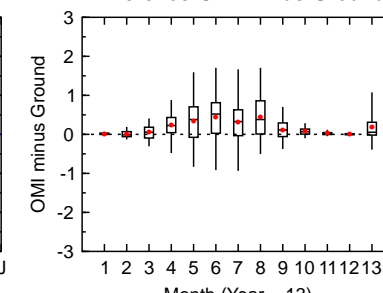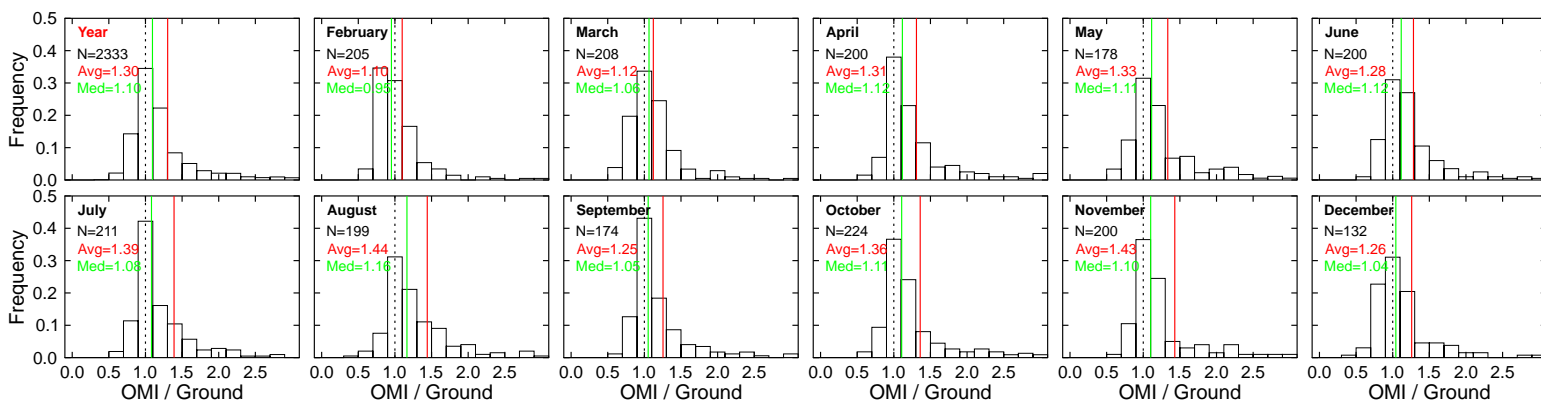

Supplement: Supplementary file 18 [file acp-15-7391-2015-supplement.zip]
