# Supplementary material for: Comparison of OMI UV observations with ground-based measurements at high northern latitudes
Source: Copernicus journal article supplement (doi:10.5194/acp-15-7391-2015), 2015-07-09

# Alert, Canada (82.5°N, 62.32°E)

## EDDose, all data

| Month     | N    | Minimum | 5%   | 25%  | Median | Average | 75%  | 95%  | Maximum | W10 | W20 | W30 |
|-----------|------|---------|------|------|--------|---------|------|------|---------|-----|-----|-----|
| January   | 0    | 0.00    | 0.00 | 0.00 | 0.00   | 0.00    | 0.00 | 0.00 | 0.00    | 0   | 0   | 0   |
| February  | 0    | 0.00    | 0.00 | 0.00 | 0.00   | 0.00    | 0.00 | 0.00 | 0.00    | 0   | 0   | 0   |
| March     | 177  | 0.24    | 0.52 | 0.88 | 0.97   | 0.95    | 1.05 | 1.19 | 2.30    | 54  | 73  | 84  |
| April     | 140  | 0.89    | 0.95 | 0.99 | 1.03   | 1.05    | 1.10 | 1.23 | 1.32    | 74  | 93  | 99  |
| May       | 119  | 0.46    | 0.73 | 0.99 | 1.03   | 1.03    | 1.08 | 1.22 | 1.58    | 74  | 88  | 92  |
| June      | 153  | 0.37    | 0.49 | 0.88 | 1.10   | 1.14    | 1.33 | 1.97 | 3.11    | 25  | 43  | 58  |
| July      | 161  | 0.52    | 0.76 | 0.97 | 1.12   | 1.19    | 1.36 | 1.78 | 3.10    | 32  | 52  | 66  |
| August    | 115  | 0.24    | 0.32 | 0.75 | 1.09   | 1.04    | 1.28 | 1.68 | 2.64    | 23  | 35  | 50  |
| September | 130  | 0.21    | 0.30 | 0.49 | 0.93   | 0.90    | 1.13 | 1.74 | 2.24    | 23  | 36  | 46  |
| October   | 40   | 0.20    | 0.44 | 0.70 | 0.85   | 0.85    | 0.98 | 1.62 | 1.92    | 25  | 45  | 55  |
| November  | 0    | 0.00    | 0.00 | 0.00 | 0.00   | 0.00    | 0.00 | 0.00 | 0.00    | 0   | 0   | 0   |
| December  | 0    | 0.00    | 0.00 | 0.00 | 0.00   | 0.00    | 0.00 | 0.00 | 0.00    | 0   | 0   | 0   |
| Year      | 1035 | 0.20    | 0.45 | 0.91 | 1.02   | 1.04    | 1.16 | 1.62 | 3.11    | 43  | 60  | 71  |

Erythemal Dose [kJ/m<sup>2</sup>] versus Time

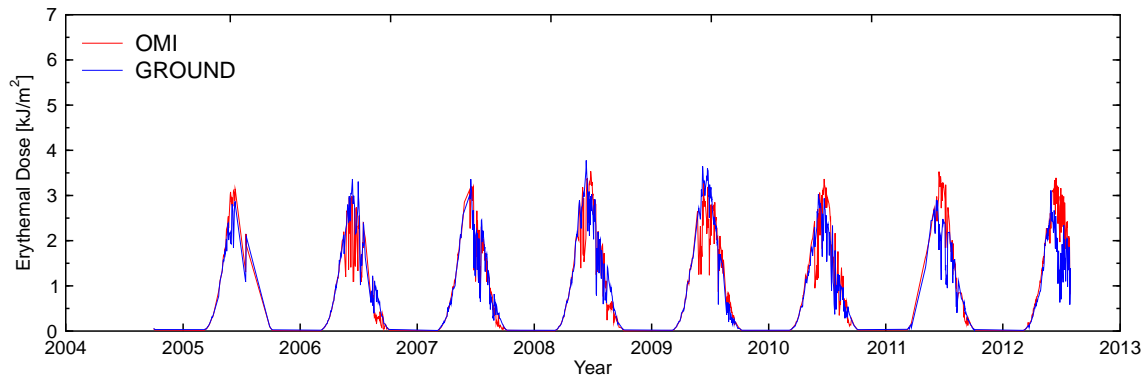

OMI versus Ground

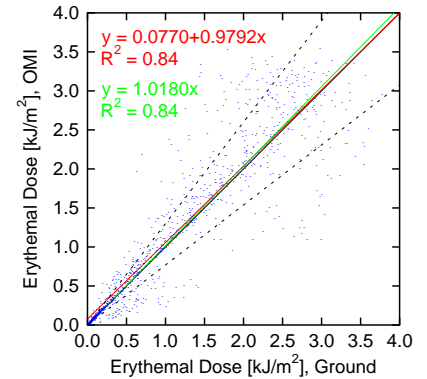

Ratio OMI / Ground

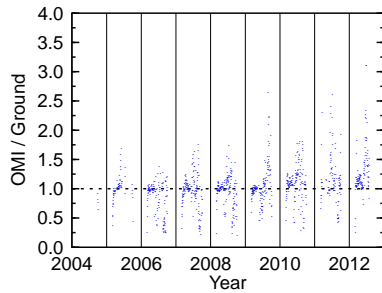

Ratio OMI / Ground

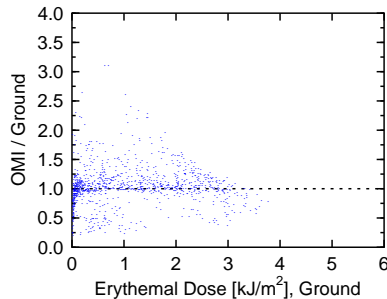

Ratio OMI / Ground

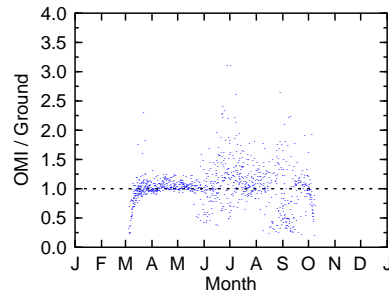

Ratio OMI / Ground

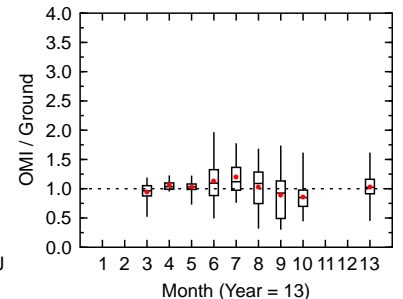

Difference OMI minus Ground

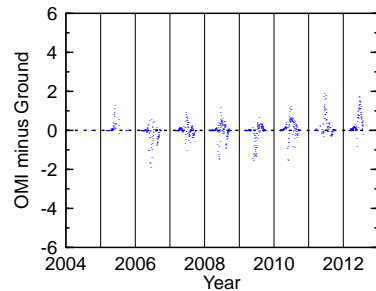

Difference OMI minus Ground

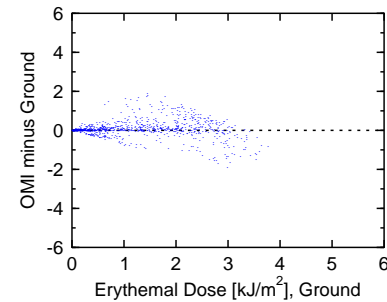

Difference OMI minus Ground

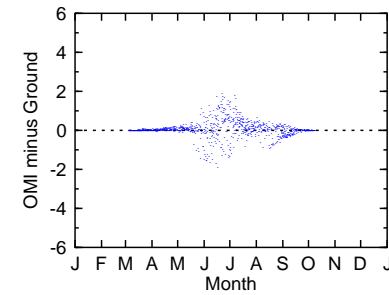

Difference OMI minus Ground

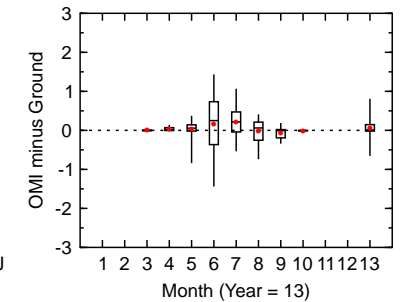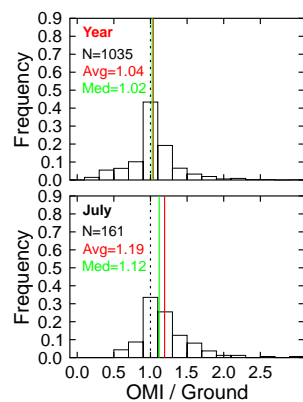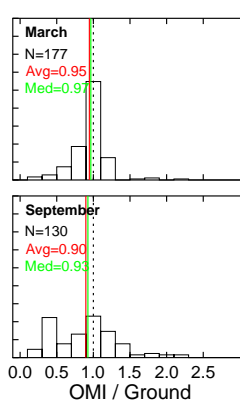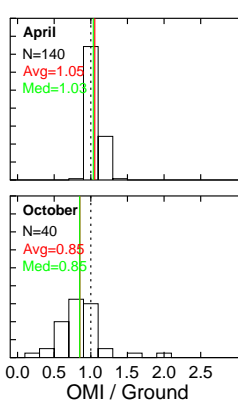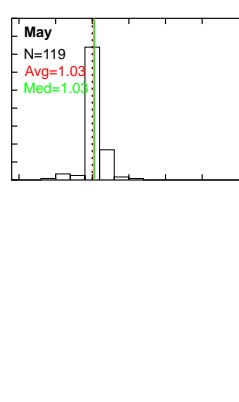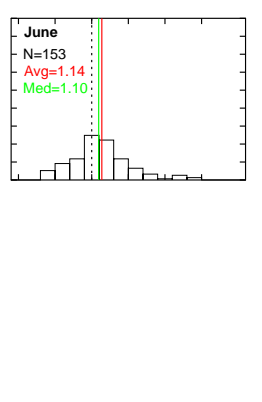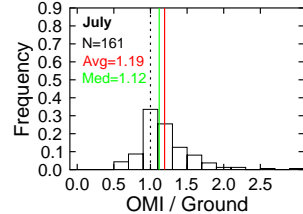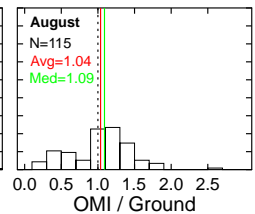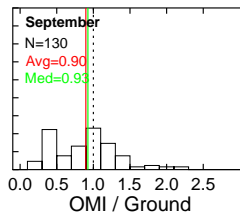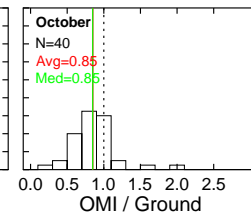

Supplement: Supplementary file 15 [file acp-15-7391-2015-supplement.zip]
