# Supplementary material for: Comparison of OMI UV observations with ground-based measurements at high northern latitudes
Source: Copernicus journal article supplement (doi:10.5194/acp-15-7391-2015), 2015-07-09

Oesteraas, Norway (59.95°N, 10.6°E)

OPEDRate, SZA less than 84, Dist less than 12 km

| Month     | N    | Minimum | 5%   | 25%  | Median | Average | 75%  | 95%  | Maximum | W10 | W20 | W30 |
|-----------|------|---------|------|------|--------|---------|------|------|---------|-----|-----|-----|
| January   | 203  | 0.49    | 0.74 | 0.90 | 1.08   | 1.20    | 1.25 | 2.06 | 4.77    | 29  | 58  | 72  |
| February  | 209  | 0.51    | 0.66 | 0.81 | 0.92   | 1.03    | 1.09 | 1.87 | 5.55    | 28  | 56  | 75  |
| March     | 209  | 0.52    | 0.71 | 0.87 | 0.99   | 1.05    | 1.13 | 1.64 | 2.79    | 33  | 64  | 79  |
| April     | 197  | 0.70    | 0.83 | 1.01 | 1.09   | 1.32    | 1.32 | 2.86 | 5.64    | 41  | 60  | 72  |
| May       | 198  | -408.83 | 0.73 | 0.99 | 1.11   | -0.72   | 1.45 | 2.67 | 5.86    | 31  | 50  | 59  |
| June      | 210  | 0.61    | 0.76 | 1.02 | 1.11   | 1.34    | 1.43 | 2.69 | 7.09    | 34  | 56  | 63  |
| July      | 211  | 0.48    | 0.78 | 0.98 | 1.08   | 1.33    | 1.38 | 2.57 | 12.94   | 40  | 57  | 66  |
| August    | 197  | 0.57    | 0.80 | 0.96 | 1.06   | 1.34    | 1.37 | 2.83 | 10.35   | 41  | 61  | 70  |
| September | 173  | 0.56    | 0.72 | 0.96 | 1.05   | 1.26    | 1.27 | 2.55 | 5.24    | 39  | 60  | 71  |
| October   | 224  | 0.39    | 0.74 | 1.01 | 1.08   | 1.34    | 1.36 | 2.69 | 7.36    | 43  | 60  | 67  |
| November  | 200  | 0.68    | 0.80 | 0.96 | 1.08   | 1.44    | 1.26 | 3.55 | 9.09    | 40  | 66  | 74  |
| December  | 127  | 0.45    | 0.70 | 0.86 | 1.03   | 1.19    | 1.26 | 2.29 | 3.88    | 33  | 51  | 64  |
| Year      | 2358 | -408.83 | 0.74 | 0.93 | 1.07   | 1.09    | 1.27 | 2.56 | 12.94   | 36  | 58  | 69  |

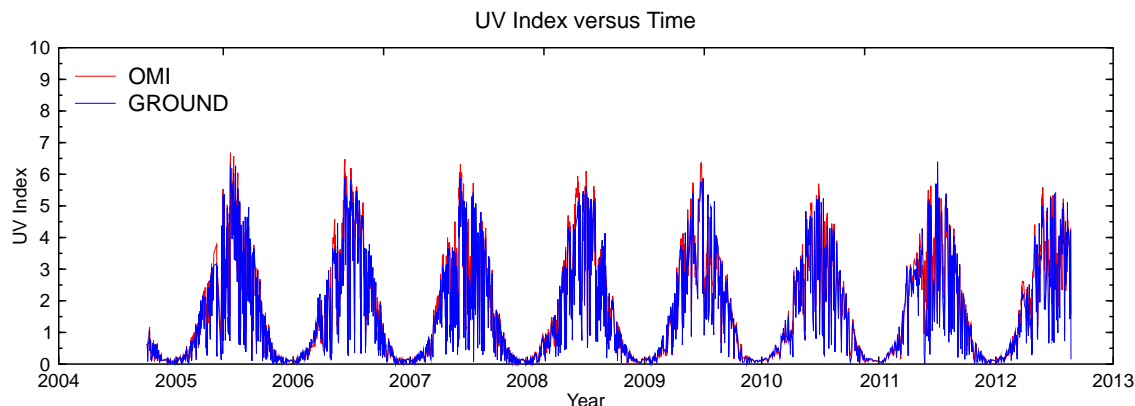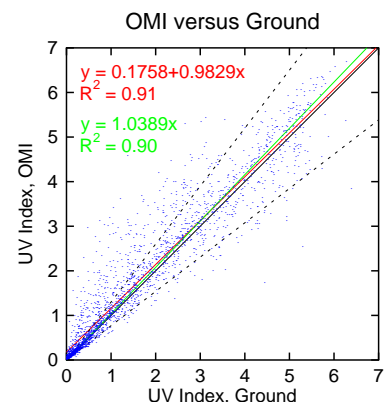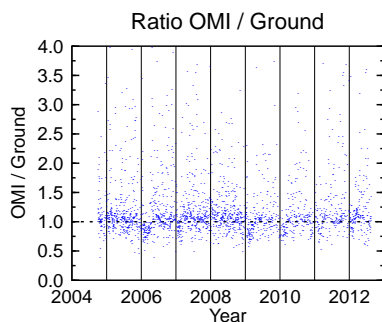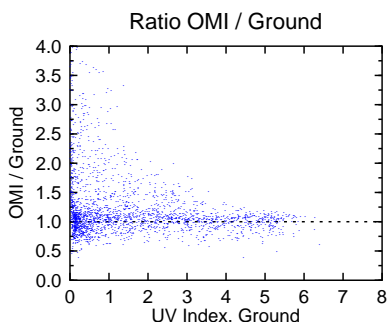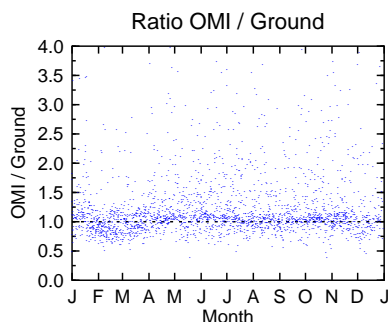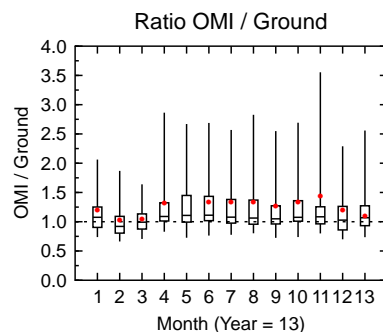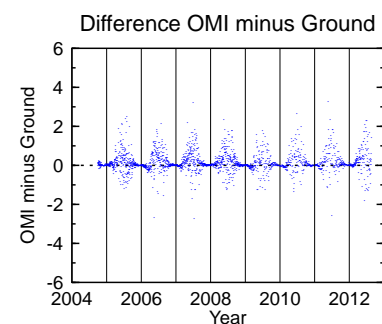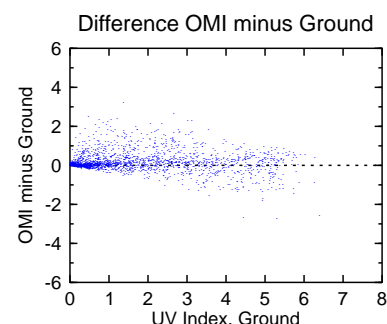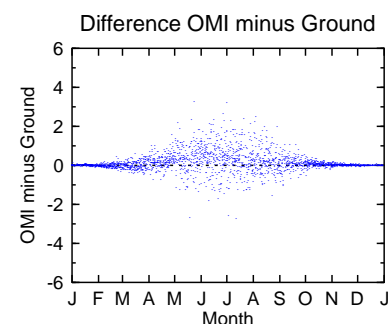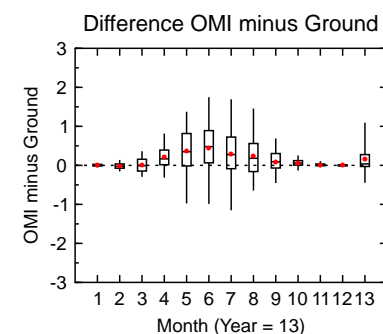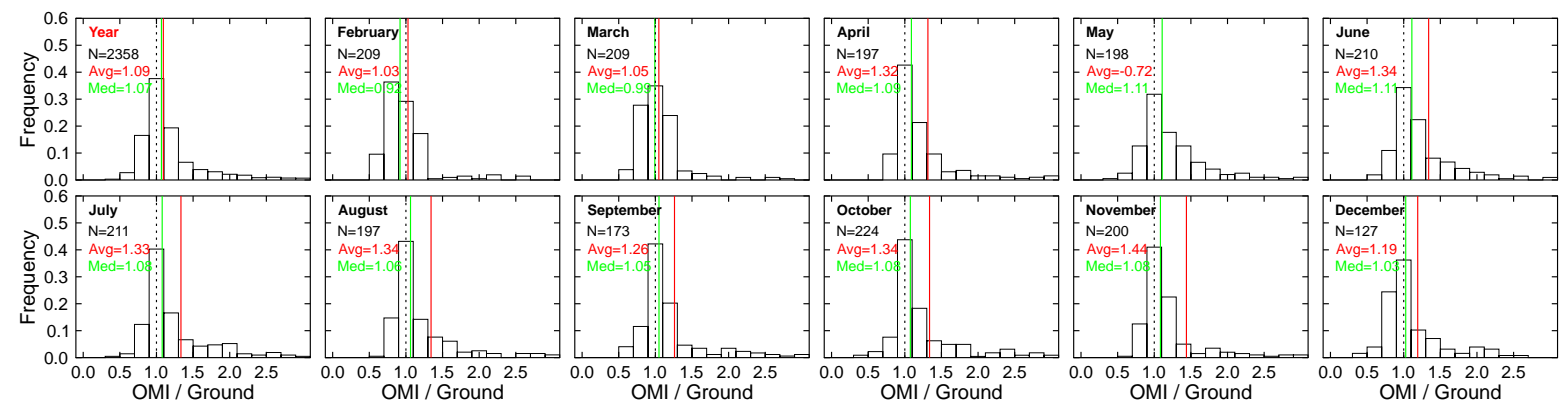

Supplement: Supplementary file 54 [file acp-15-7391-2015-supplement.zip]
