# Supplementary material for: Comparison of OMI UV observations with ground-based measurements at high northern latitudes
Source: Copernicus journal article supplement (doi:10.5194/acp-15-7391-2015), 2015-07-09

Summit, Greenland (72.58°N, 38.46°E)

EDRate (Ground at local solar noon), SZA less than 84, Dist less than 12 km

| Month     | N    | Minimum | 5%   | 25%  | Median | Average | 75%  | 95%  | Maximum | W10 | W20 | W30 |
|-----------|------|---------|------|------|--------|---------|------|------|---------|-----|-----|-----|
| January   | 0    | 0.00    | 0.00 | 0.00 | 0.00   | 0.00    | 0.00 | 0.00 | 0.00    | 0   | 0   | 0   |
| February  | 68   | 0.87    | 0.90 | 0.94 | 0.98   | 0.98    | 1.02 | 1.07 | 1.12    | 88  | 100 | 100 |
| March     | 356  | 0.92    | 0.94 | 0.98 | 1.00   | 1.01    | 1.04 | 1.12 | 1.24    | 93  | 99  | 100 |
| April     | 353  | 0.93    | 0.98 | 1.02 | 1.04   | 1.05    | 1.07 | 1.17 | 1.27    | 85  | 97  | 100 |
| May       | 341  | 0.97    | 1.01 | 1.03 | 1.06   | 1.06    | 1.08 | 1.14 | 1.26    | 88  | 99  | 100 |
| June      | 285  | 0.99    | 1.02 | 1.05 | 1.07   | 1.08    | 1.09 | 1.16 | 1.48    | 77  | 98  | 100 |
| July      | 264  | 0.97    | 1.02 | 1.06 | 1.09   | 1.11    | 1.15 | 1.24 | 1.36    | 57  | 89  | 99  |
| August    | 360  | 0.99    | 1.04 | 1.07 | 1.12   | 1.13    | 1.17 | 1.25 | 1.37    | 43  | 87  | 98  |
| September | 356  | 0.98    | 1.04 | 1.09 | 1.14   | 1.14    | 1.19 | 1.27 | 1.39    | 32  | 79  | 97  |
| October   | 227  | 0.95    | 1.02 | 1.06 | 1.09   | 1.10    | 1.13 | 1.24 | 1.29    | 55  | 93  | 100 |
| November  | 0    | 0.00    | 0.00 | 0.00 | 0.00   | 0.00    | 0.00 | 0.00 | 0.00    | 0   | 0   | 0   |
| December  | 0    | 0.00    | 0.00 | 0.00 | 0.00   | 0.00    | 0.00 | 0.00 | 0.00    | 0   | 0   | 0   |
| Year      | 2610 | 0.87    | 0.98 | 1.03 | 1.07   | 1.08    | 1.12 | 1.22 | 1.48    | 67  | 93  | 99  |

UV Index versus Time

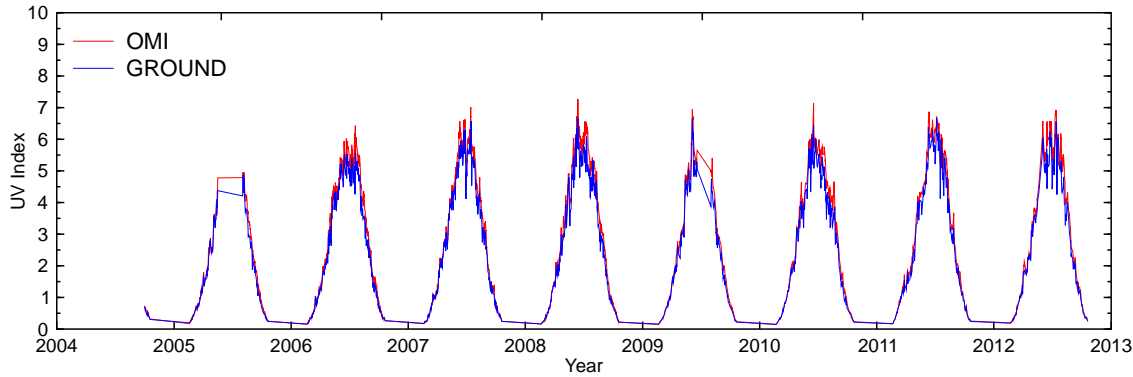

OMI versus Ground

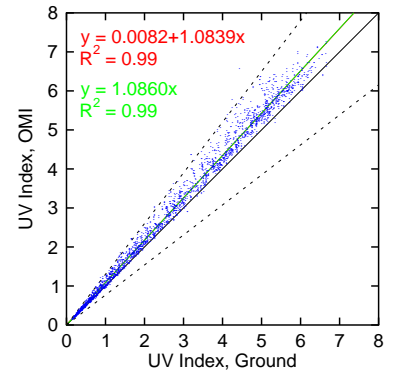

Ratio OMI / Ground

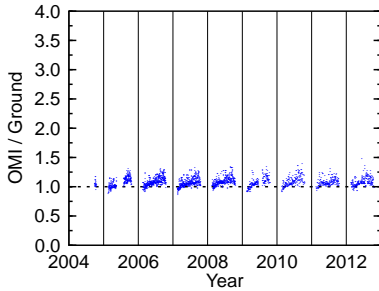

Ratio OMI / Ground

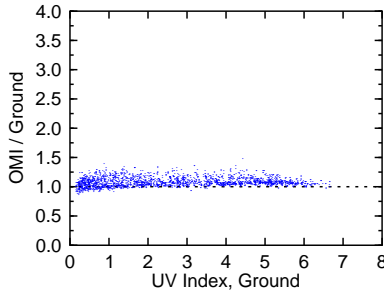

Ratio OMI / Ground

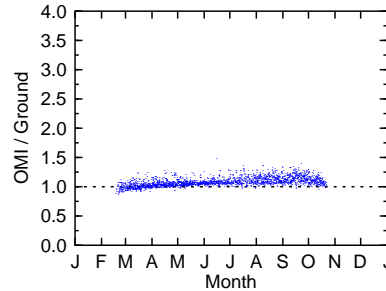

Ratio OMI / Ground

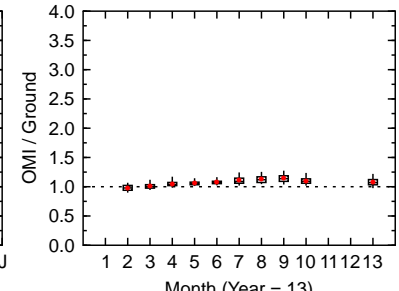

Difference OMI minus Ground

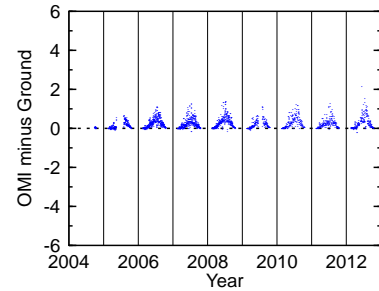

Difference OMI minus Ground

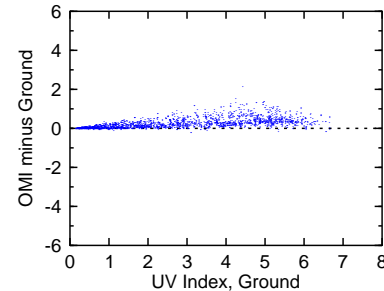

Difference OMI minus Ground

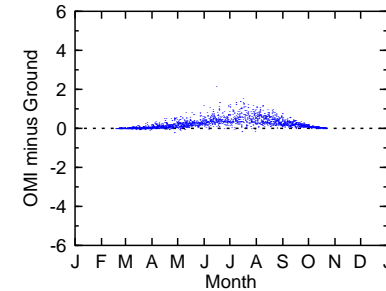

Difference OMI minus Ground

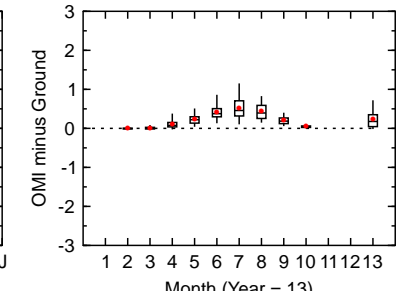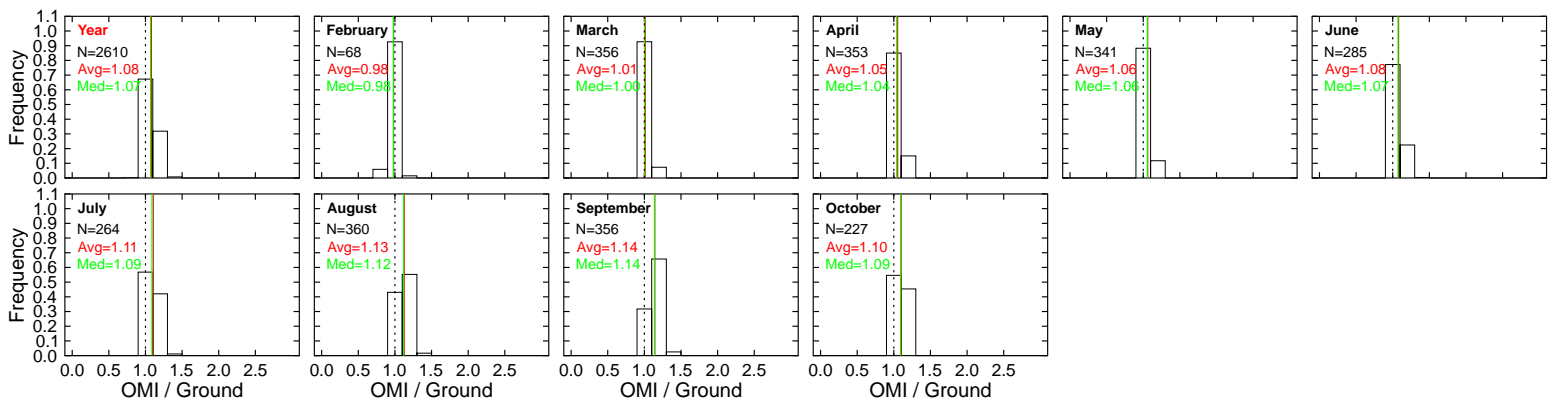

Supplement: Supplementary file 9 [file acp-15-7391-2015-supplement.zip]
