# Supplementary material for: Comparison of OMI UV observations with ground-based measurements at high northern latitudes
Source: Copernicus journal article supplement (doi:10.5194/acp-15-7391-2015), 2015-07-09

Trondheim, Norway (63.42°N, 10.4°E)

CSEDDose, SZA less than 84, Dist less than 12 km

| Month     | N    | Minimum | 5%   | 25%  | Median | Average | 75%  | 95%  | Maximum | W10 | W20 | W30 |
|-----------|------|---------|------|------|--------|---------|------|------|---------|-----|-----|-----|
| January   | 54   | 0.98    | 1.07 | 1.41 | 1.73   | 1.92    | 2.46 | 3.08 | 3.71    | 9   | 13  | 20  |
| February  | 143  | 1.03    | 1.19 | 1.36 | 1.59   | 1.78    | 1.95 | 3.00 | 7.16    | 2   | 6   | 15  |
| March     | 166  | 1.19    | 1.30 | 1.42 | 1.60   | 1.90    | 2.13 | 3.11 | 5.98    | 0   | 1   | 5   |
| April     | 170  | 1.21    | 1.37 | 1.53 | 1.83   | 2.11    | 2.34 | 3.88 | 6.92    | 0   | 0   | 1   |
| May       | 164  | 1.22    | 1.33 | 1.59 | 1.89   | 2.17    | 2.35 | 4.02 | 6.69    | 0   | 0   | 4   |
| June      | 174  | 1.15    | 1.21 | 1.36 | 1.72   | 2.01    | 2.29 | 3.83 | 6.94    | 0   | 2   | 13  |
| July      | 199  | 1.13    | 1.18 | 1.33 | 1.62   | 2.03    | 2.23 | 4.20 | 9.16    | 0   | 6   | 22  |
| August    | 182  | 1.16    | 1.20 | 1.32 | 1.59   | 1.97    | 2.16 | 4.19 | 7.25    | 0   | 5   | 22  |
| September | 165  | 1.15    | 1.19 | 1.36 | 1.74   | 2.03    | 2.38 | 3.92 | 7.33    | 0   | 6   | 19  |
| October   | 187  | 1.11    | 1.24 | 1.38 | 1.72   | 2.14    | 2.33 | 4.75 | 8.37    | 0   | 3   | 15  |
| November  | 96   | 1.07    | 1.20 | 1.41 | 1.65   | 1.90    | 2.05 | 3.15 | 7.49    | 1   | 5   | 14  |
| December  | 0    | 0.00    | 0.00 | 0.00 | 0.00   | 0.00    | 0.00 | 0.00 | 0.00    | 0   | 0   | 0   |
| Year      | 1700 | 0.98    | 1.21 | 1.40 | 1.71   | 2.01    | 2.24 | 3.83 | 9.16    | 1   | 4   | 13  |

Erythemal Dose [ $\text{kJ/m}^2$ ] versus Time

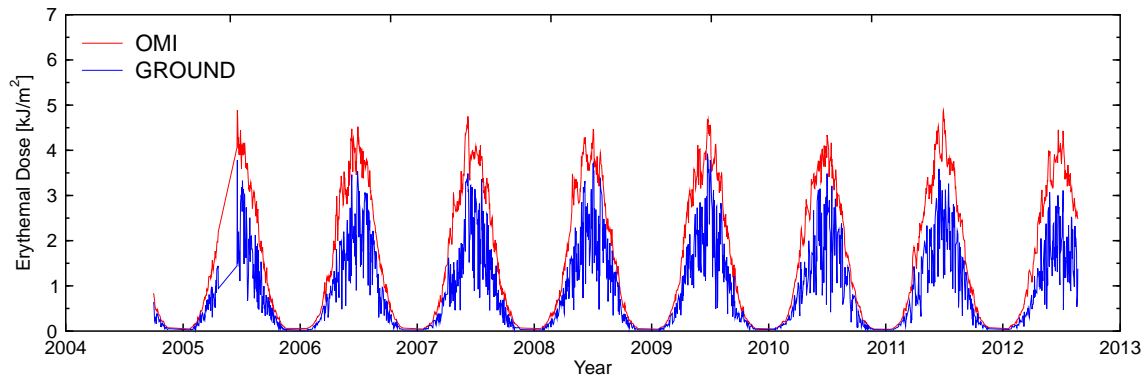

OMI versus Ground

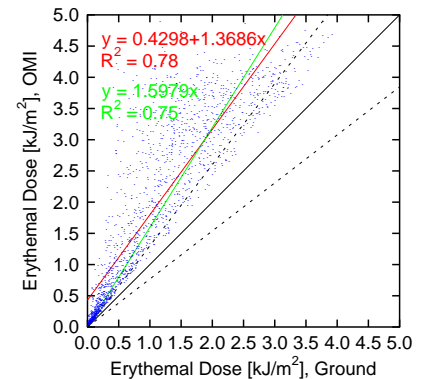

Ratio OMI / Ground

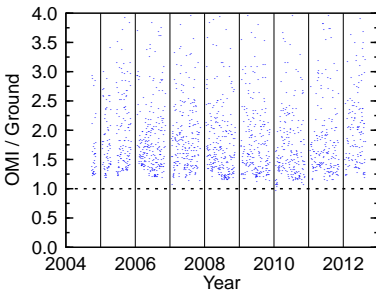

Ratio OMI / Ground

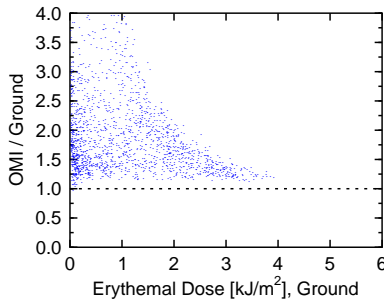

Ratio OMI / Ground

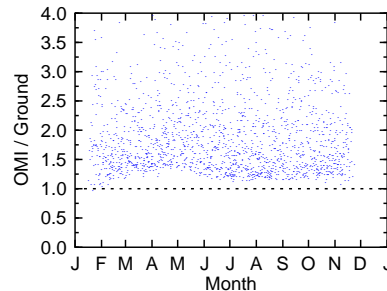

Ratio OMI / Ground

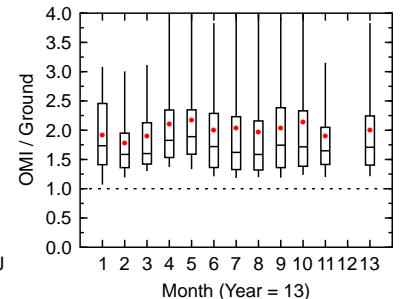

Difference OMI minus Ground

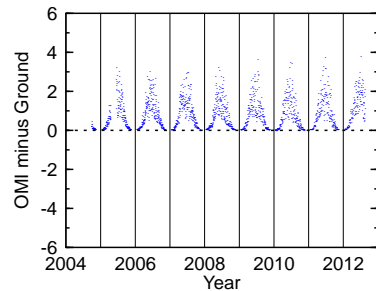

Difference OMI minus Ground

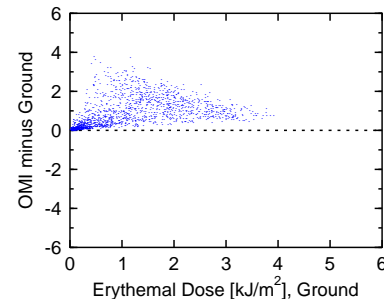

Difference OMI minus Ground

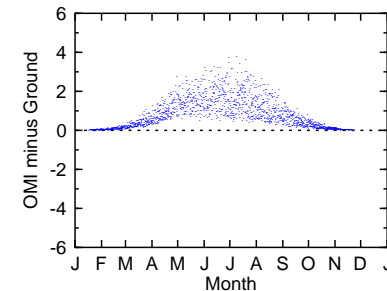

Difference OMI minus Ground

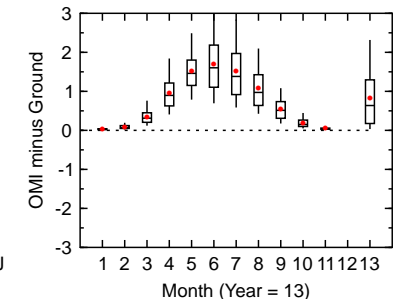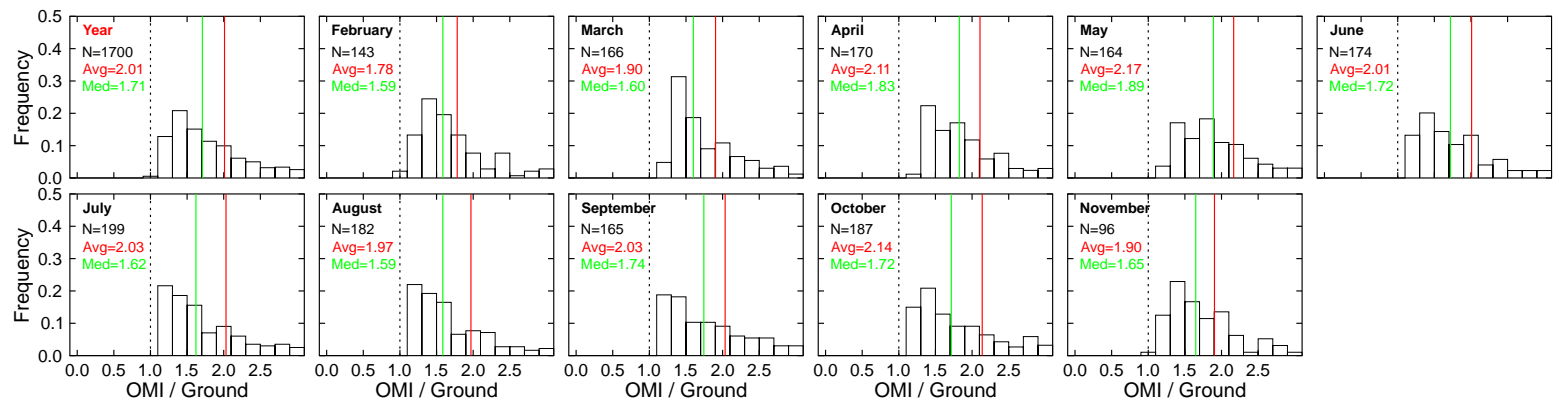

Supplement: Supplementary file 72 [file acp-15-7391-2015-supplement.zip]
