# Supplementary material for: Comparison of OMI UV observations with ground-based measurements at high northern latitudes
Source: Copernicus journal article supplement (doi:10.5194/acp-15-7391-2015), 2015-07-09

Oesteraas, Norway (59.95°N, 10.6°E)

EDRate (Ground at local solar noon), SZA less than 84, Dist less than 12 km

| Month     | N    | Minimum | 5%   | 25%  | Median | Average | 75%  | 95%  | Maximum | W10 | W20 | W30 |
|-----------|------|---------|------|------|--------|---------|------|------|---------|-----|-----|-----|
| January   | 200  | 0.41    | 0.70 | 0.88 | 1.04   | 1.24    | 1.20 | 2.10 | 13.15   | 36  | 55  | 72  |
| February  | 209  | 0.43    | 0.62 | 0.77 | 0.89   | 1.00    | 1.07 | 1.53 | 4.39    | 25  | 48  | 65  |
| March     | 208  | 0.48    | 0.62 | 0.84 | 0.97   | 1.03    | 1.11 | 1.68 | 3.35    | 28  | 58  | 74  |
| April     | 197  | 0.47    | 0.75 | 0.96 | 1.06   | 1.25    | 1.31 | 2.31 | 7.33    | 43  | 58  | 68  |
| May       | 197  | 0.62    | 0.76 | 0.96 | 1.10   | 1.40    | 1.47 | 3.01 | 6.61    | 32  | 50  | 58  |
| June      | 209  | 0.57    | 0.77 | 1.04 | 1.16   | 1.58    | 1.48 | 3.12 | 25.50   | 19  | 47  | 60  |
| July      | 210  | 0.50    | 0.76 | 0.99 | 1.10   | 1.54    | 1.60 | 3.01 | 21.02   | 35  | 49  | 58  |
| August    | 197  | 0.49    | 0.80 | 0.99 | 1.10   | 1.40    | 1.48 | 3.10 | 8.37    | 35  | 55  | 62  |
| September | 172  | 0.48    | 0.79 | 0.99 | 1.09   | 1.30    | 1.41 | 2.32 | 4.83    | 41  | 55  | 65  |
| October   | 224  | 0.46    | 0.73 | 1.02 | 1.11   | 1.35    | 1.48 | 2.66 | 6.06    | 33  | 52  | 63  |
| November  | 198  | 0.41    | 0.75 | 0.96 | 1.08   | 1.41    | 1.34 | 3.19 | 7.95    | 34  | 57  | 68  |
| December  | 129  | 0.33    | 0.68 | 0.86 | 1.00   | 1.20    | 1.19 | 2.37 | 6.58    | 36  | 56  | 67  |
| Year      | 2350 | 0.33    | 0.71 | 0.92 | 1.07   | 1.31    | 1.33 | 2.52 | 25.50   | 33  | 53  | 65  |

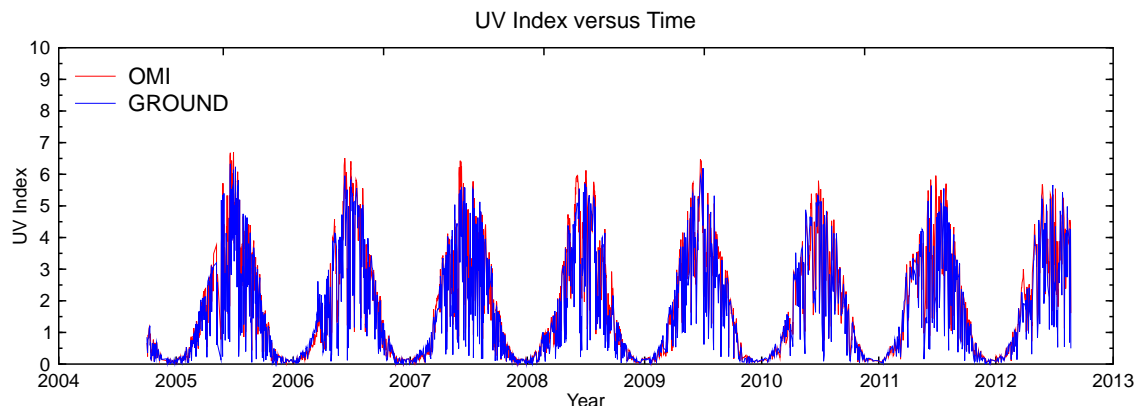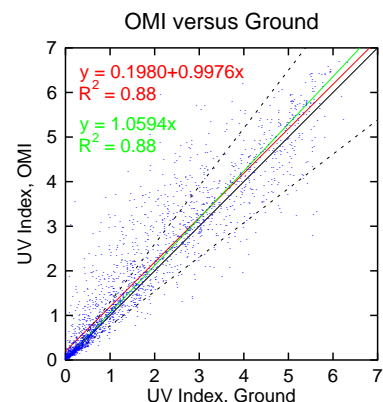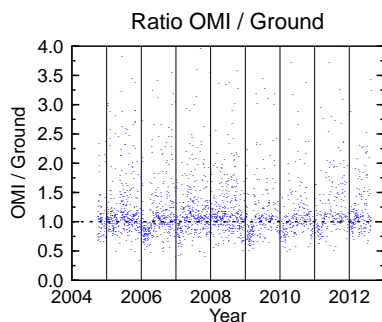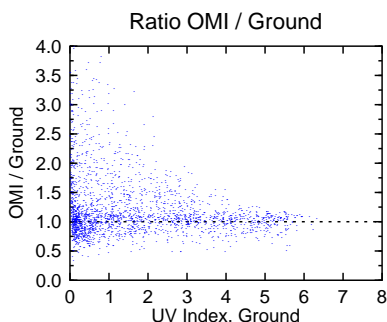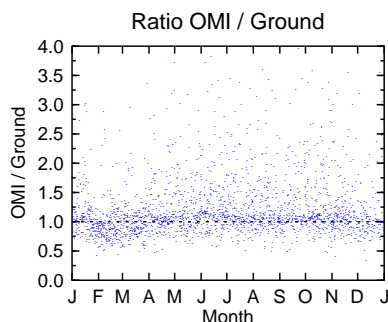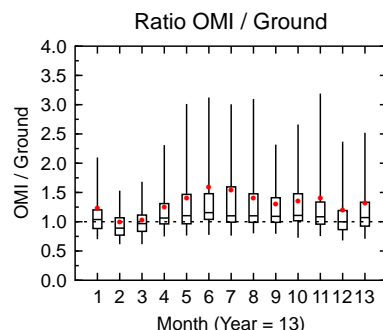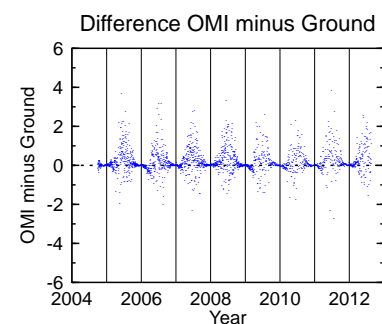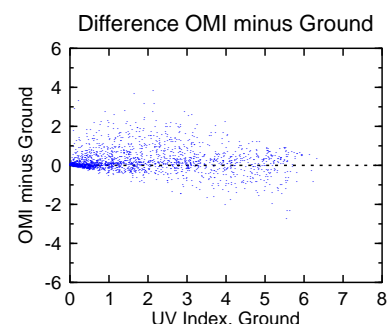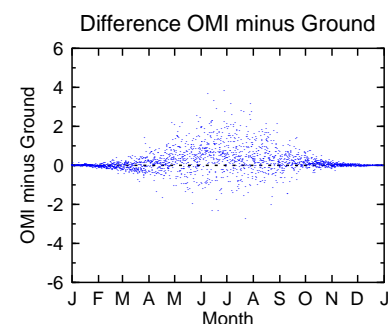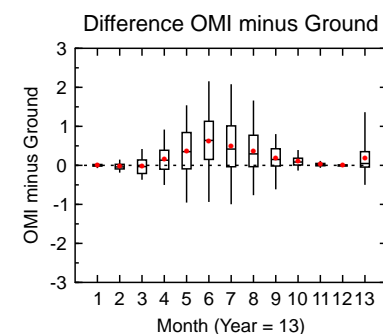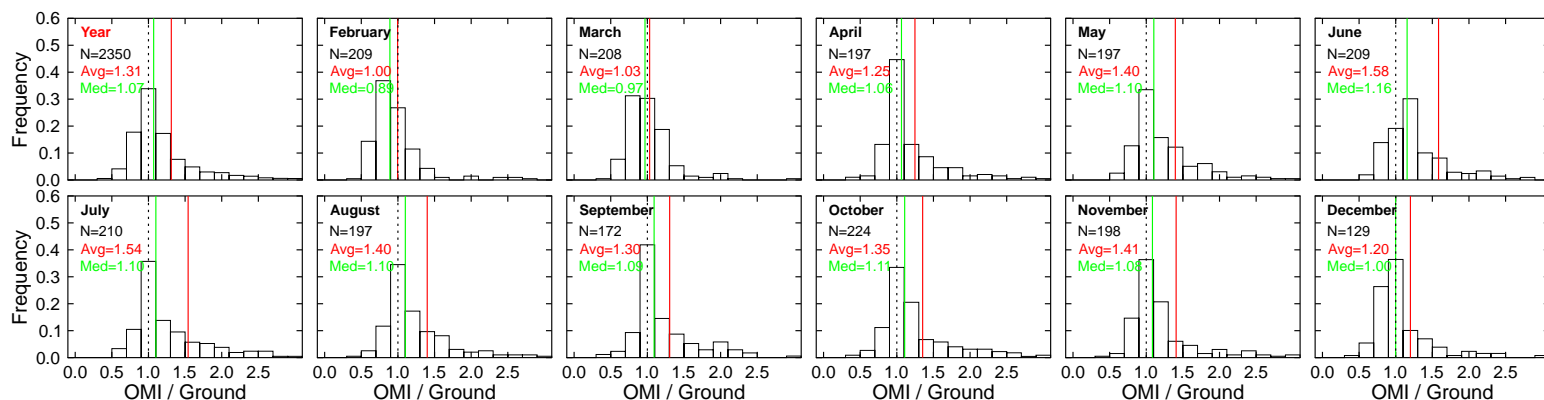

Supplement: Supplementary file 84 [file acp-15-7391-2015-supplement.zip]
