# Supplementary material for: Comparison of OMI UV observations with ground-based measurements at high northern latitudes
Source: Copernicus journal article supplement (doi:10.5194/acp-15-7391-2015), 2015-07-09

Trondheim, Norway (63.42°N, 10.4°E)

EDDose, SZA less than 84, Dist less than 12 km

| Month     | N    | Minimum | 5%   | 25%  | Median | Average | 75%  | 95%  | Maximum | W10 | W20 | W30 |
|-----------|------|---------|------|------|--------|---------|------|------|---------|-----|-----|-----|
| January   | 54   | 0.97    | 1.06 | 1.40 | 1.72   | 1.88    | 2.44 | 2.92 | 3.18    | 9   | 13  | 20  |
| February  | 143  | 0.74    | 1.16 | 1.34 | 1.55   | 1.66    | 1.82 | 2.42 | 6.41    | 2   | 7   | 17  |
| March     | 166  | 1.09    | 1.27 | 1.39 | 1.56   | 1.70    | 1.93 | 2.51 | 3.36    | 1   | 2   | 10  |
| April     | 170  | 0.89    | 1.31 | 1.43 | 1.69   | 1.81    | 2.01 | 2.77 | 3.89    | 0   | 1   | 4   |
| May       | 164  | 0.87    | 1.16 | 1.31 | 1.51   | 1.59    | 1.77 | 2.28 | 4.97    | 2   | 9   | 21  |
| June      | 174  | 0.71    | 0.96 | 1.15 | 1.24   | 1.26    | 1.37 | 1.63 | 1.87    | 15  | 40  | 63  |
| July      | 199  | 0.45    | 0.92 | 1.06 | 1.14   | 1.17    | 1.26 | 1.55 | 2.08    | 32  | 65  | 80  |
| August    | 182  | 0.58    | 0.86 | 1.03 | 1.13   | 1.15    | 1.24 | 1.51 | 2.12    | 29  | 64  | 82  |
| September | 165  | 0.60    | 0.85 | 1.06 | 1.16   | 1.17    | 1.28 | 1.47 | 2.62    | 25  | 58  | 73  |
| October   | 187  | 0.63    | 0.93 | 1.13 | 1.25   | 1.28    | 1.37 | 1.73 | 2.70    | 16  | 37  | 60  |
| November  | 96   | 0.76    | 1.07 | 1.28 | 1.48   | 1.57    | 1.72 | 2.53 | 3.11    | 5   | 16  | 28  |
| December  | 0    | 0.00    | 0.00 | 0.00 | 0.00   | 0.00    | 0.00 | 0.00 | 0.00    | 0   | 0   | 0   |
| Year      | 1700 | 0.45    | 0.94 | 1.16 | 1.32   | 1.43    | 1.58 | 2.33 | 6.41    | 14  | 31  | 45  |

Erythemal Dose [kJ/m<sup>2</sup>] versus Time

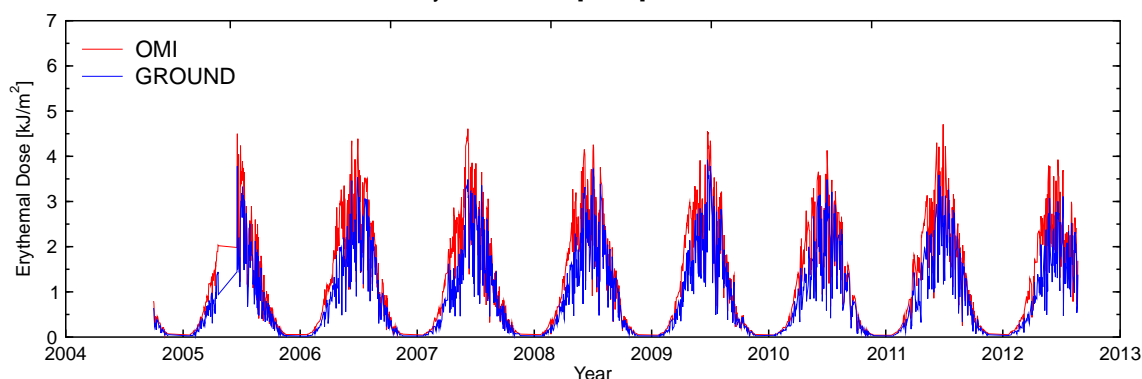

OMI versus Ground

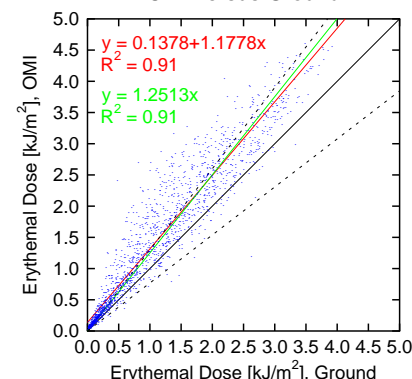

Ratio OMI / Ground

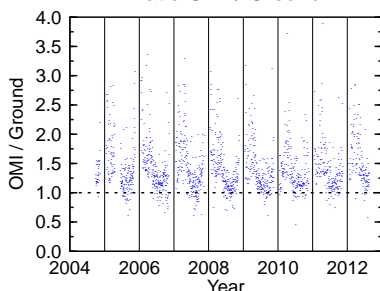

Ratio OMI / Ground

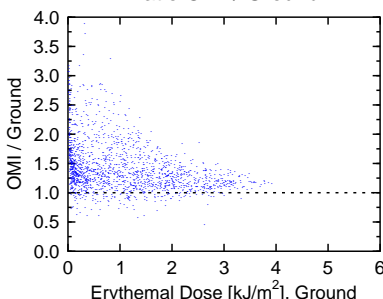

Ratio OMI / Ground

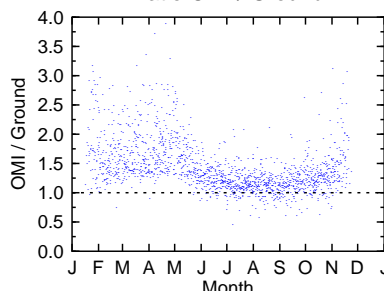

Ratio OMI / Ground

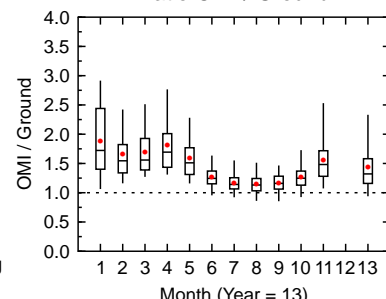

Difference OMI minus Ground

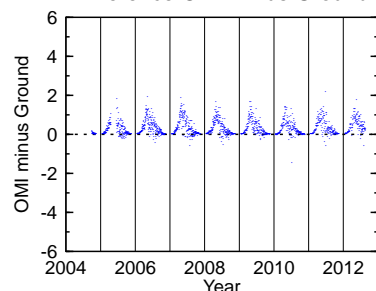

Difference OMI minus Ground

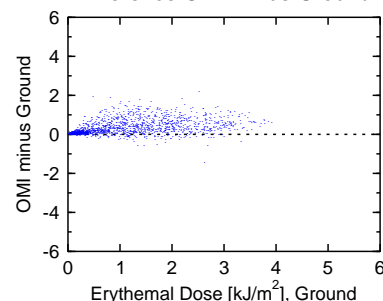

Difference OMI minus Ground

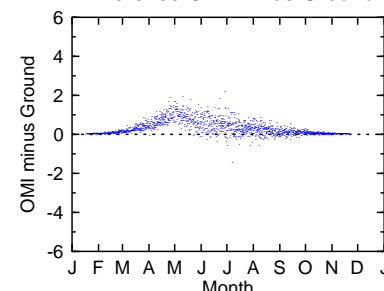

Difference OMI minus Ground

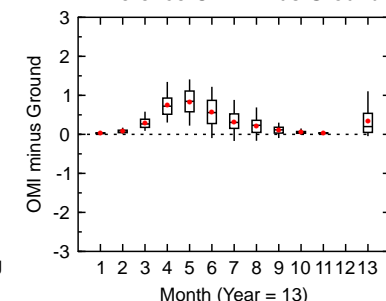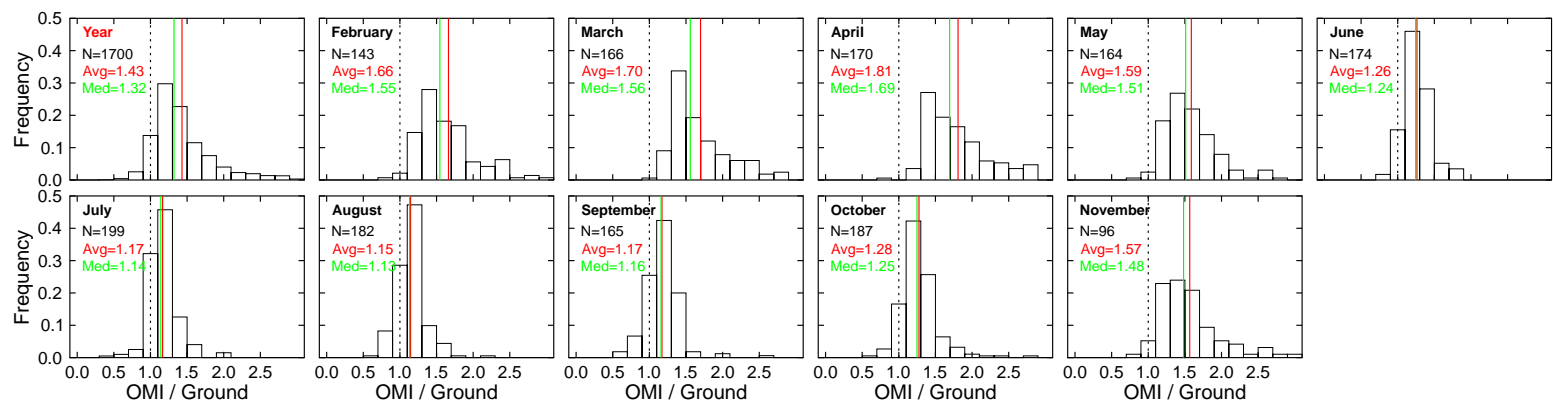

Supplement: Supplementary file 90 [file acp-15-7391-2015-supplement.zip]
