# Supplementary material for: Comparison of OMI UV observations with ground-based measurements at high northern latitudes
Source: Copernicus journal article supplement (doi:10.5194/acp-15-7391-2015), 2015-07-09

Eureka, Canada (79.99°N, 85.93°E)

OPEDRate, SZA less than 84, Dist less than 12 km

| Month     | N    | Minimum | 5%   | 25%  | Median | Average | 75%  | 95%  | Maximum | W10 | W20 | W30 |
|-----------|------|---------|------|------|--------|---------|------|------|---------|-----|-----|-----|
| January   | 0    | 0.00    | 0.00 | 0.00 | 0.00   | 0.00    | 0.00 | 0.00 | 0.00    | 0   | 0   | 0   |
| February  | 0    | 0.00    | 0.00 | 0.00 | 0.00   | 0.00    | 0.00 | 0.00 | 0.00    | 0   | 0   | 0   |
| March     | 50   | 1.07    | 1.10 | 1.18 | 1.23   | 1.23    | 1.28 | 1.36 | 1.38    | 6   | 36  | 80  |
| April     | 68   | 0.79    | 1.07 | 1.11 | 1.14   | 1.15    | 1.17 | 1.27 | 1.47    | 18  | 84  | 97  |
| May       | 155  | 0.49    | 0.80 | 1.09 | 1.13   | 1.14    | 1.18 | 1.37 | 2.11    | 23  | 75  | 88  |
| June      | 225  | 0.62    | 0.93 | 1.11 | 1.18   | 1.22    | 1.28 | 1.65 | 2.05    | 17  | 52  | 77  |
| July      | 293  | 0.42    | 0.89 | 1.01 | 1.10   | 1.10    | 1.16 | 1.34 | 2.69    | 41  | 83  | 91  |
| August    | 298  | 0.61    | 0.84 | 1.06 | 1.14   | 1.15    | 1.19 | 1.47 | 3.73    | 30  | 73  | 86  |
| September | 149  | 0.16    | 0.68 | 1.11 | 1.23   | 1.22    | 1.35 | 1.76 | 3.18    | 11  | 25  | 58  |
| October   | 0    | 0.00    | 0.00 | 0.00 | 0.00   | 0.00    | 0.00 | 0.00 | 0.00    | 0   | 0   | 0   |
| November  | 0    | 0.00    | 0.00 | 0.00 | 0.00   | 0.00    | 0.00 | 0.00 | 0.00    | 0   | 0   | 0   |
| December  | 0    | 0.00    | 0.00 | 0.00 | 0.00   | 0.00    | 0.00 | 0.00 | 0.00    | 0   | 0   | 0   |
| Year      | 1238 | 0.16    | 0.84 | 1.08 | 1.15   | 1.16    | 1.22 | 1.53 | 3.73    | 25  | 65  | 83  |

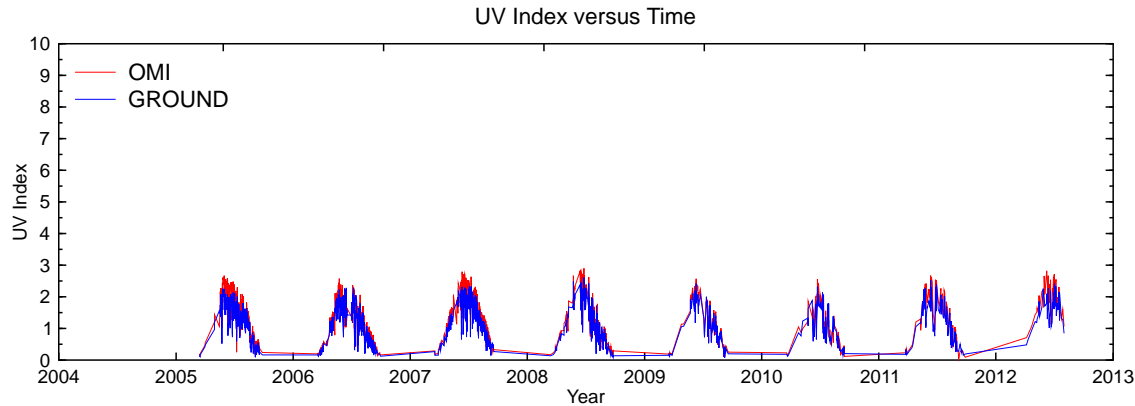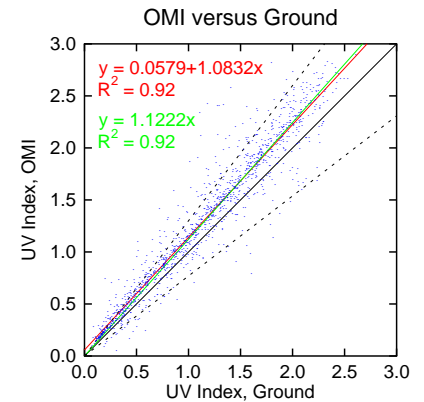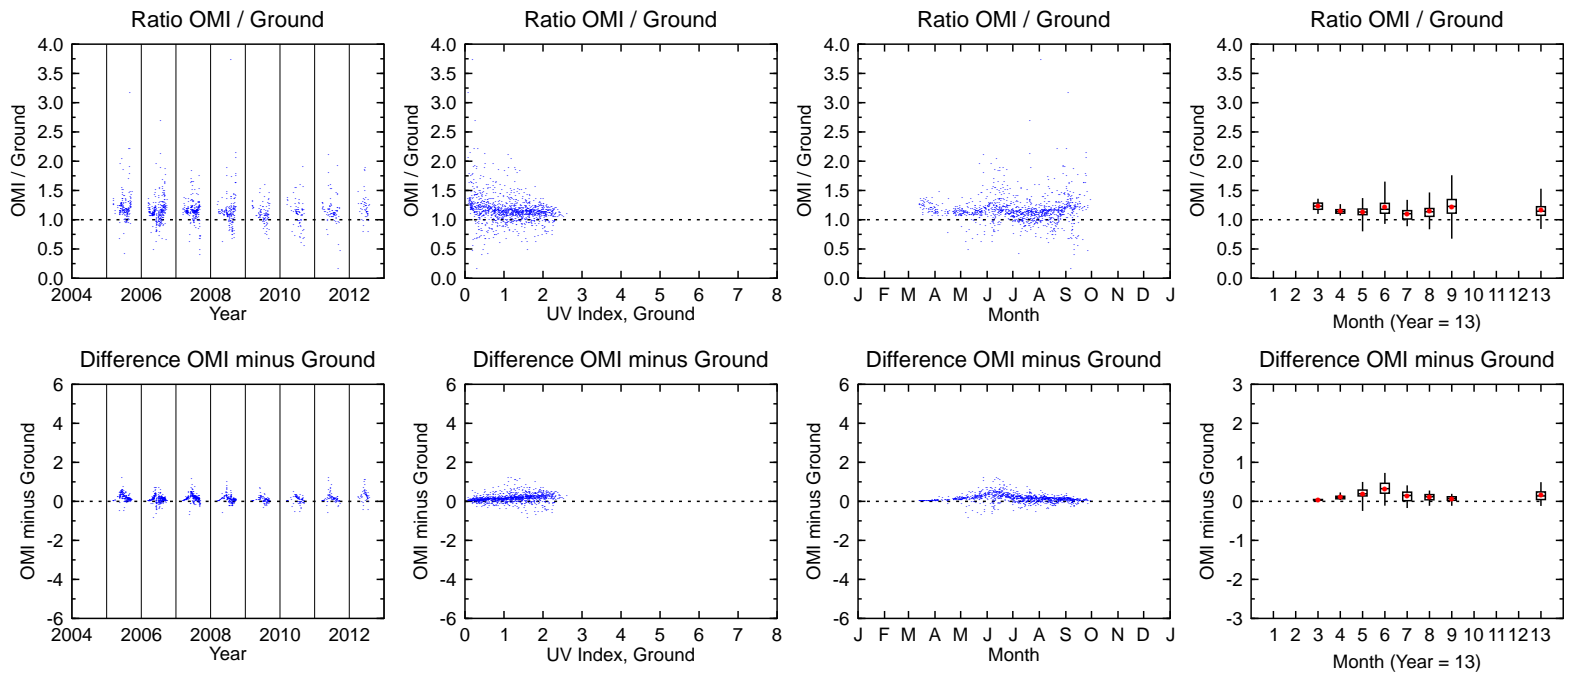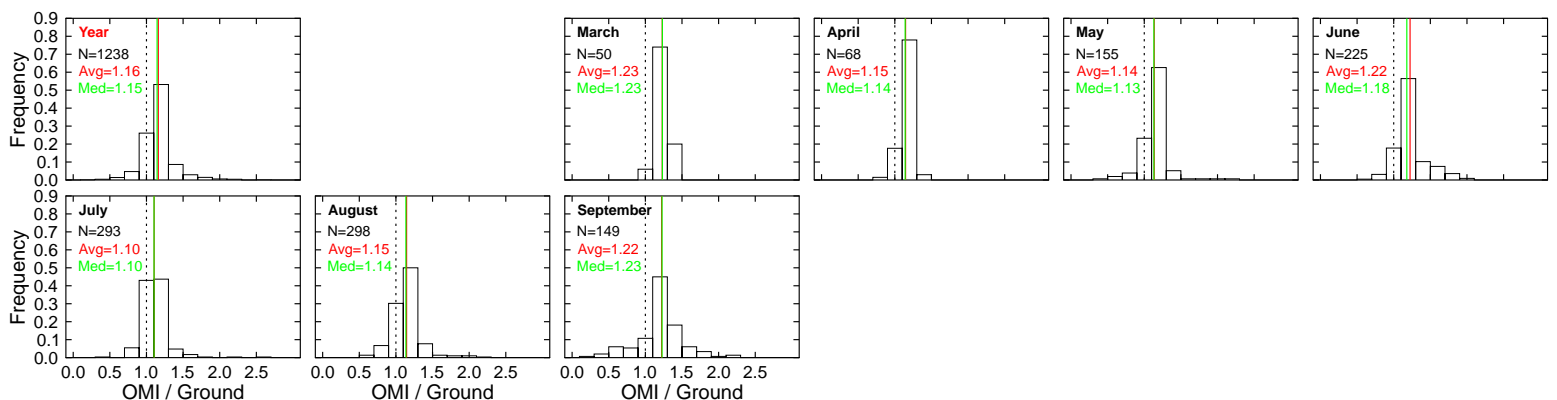

Supplement: Supplementary file 1 [file acp-15-7391-2015-supplement.zip]
