# Supplementary material for: Comparison of OMI UV observations with ground-based measurements at high northern latitudes
Source: Copernicus journal article supplement (doi:10.5194/acp-15-7391-2015), 2015-07-09

Summit, Greenland (72.58°N, 38.46°E)  
EDDose, all data

| Month     | N    | Minimum | 5%   | 25%  | Median | Average | 75%  | 95%  | Maximum | W10 | W20 | W30 |
|-----------|------|---------|------|------|--------|---------|------|------|---------|-----|-----|-----|
| January   | 0    | 0.00    | 0.00 | 0.00 | 0.00   | 0.00    | 0.00 | 0.00 | 0.00    | 0   | 0   | 0   |
| February  | 145  | 0.31    | 0.46 | 0.77 | 0.86   | 0.85    | 0.96 | 1.10 | 1.48    | 34  | 59  | 74  |
| March     | 182  | 0.88    | 0.92 | 0.95 | 0.99   | 0.99    | 1.02 | 1.05 | 1.13    | 97  | 100 | 100 |
| April     | 180  | 0.96    | 0.99 | 1.01 | 1.04   | 1.04    | 1.07 | 1.11 | 1.20    | 92  | 100 | 100 |
| May       | 187  | 0.99    | 1.02 | 1.04 | 1.06   | 1.06    | 1.08 | 1.11 | 1.15    | 91  | 100 | 100 |
| June      | 174  | 1.03    | 1.04 | 1.07 | 1.08   | 1.09    | 1.10 | 1.14 | 1.26    | 68  | 99  | 100 |
| July      | 151  | 1.04    | 1.06 | 1.09 | 1.11   | 1.12    | 1.15 | 1.20 | 1.24    | 40  | 96  | 100 |
| August    | 214  | 1.05    | 1.06 | 1.10 | 1.14   | 1.14    | 1.17 | 1.24 | 1.31    | 26  | 89  | 100 |
| September | 208  | 1.03    | 1.06 | 1.09 | 1.13   | 1.13    | 1.17 | 1.21 | 1.31    | 30  | 88  | 100 |
| October   | 233  | 0.89    | 0.96 | 1.03 | 1.07   | 1.09    | 1.13 | 1.30 | 1.54    | 62  | 87  | 94  |
| November  | 33   | 0.42    | 0.51 | 0.74 | 0.86   | 0.88    | 1.08 | 1.16 | 1.23    | 33  | 55  | 73  |
| December  | 0    | 0.00    | 0.00 | 0.00 | 0.00   | 0.00    | 0.00 | 0.00 | 0.00    | 0   | 0   | 0   |
| Year      | 1707 | 0.31    | 0.86 | 1.02 | 1.07   | 1.06    | 1.12 | 1.20 | 1.54    | 59  | 91  | 96  |

Erythemal Dose [kJ/m<sup>2</sup>] versus Time

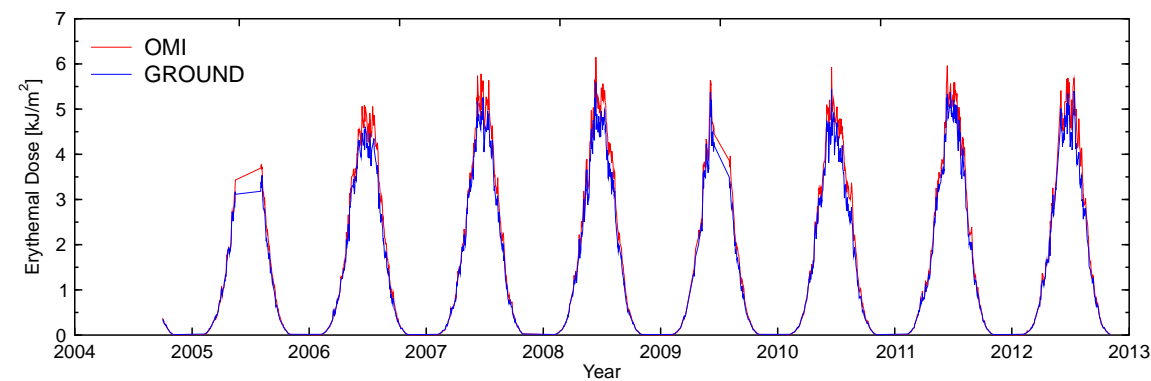

OMI versus Ground

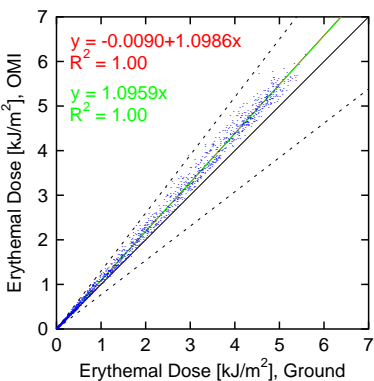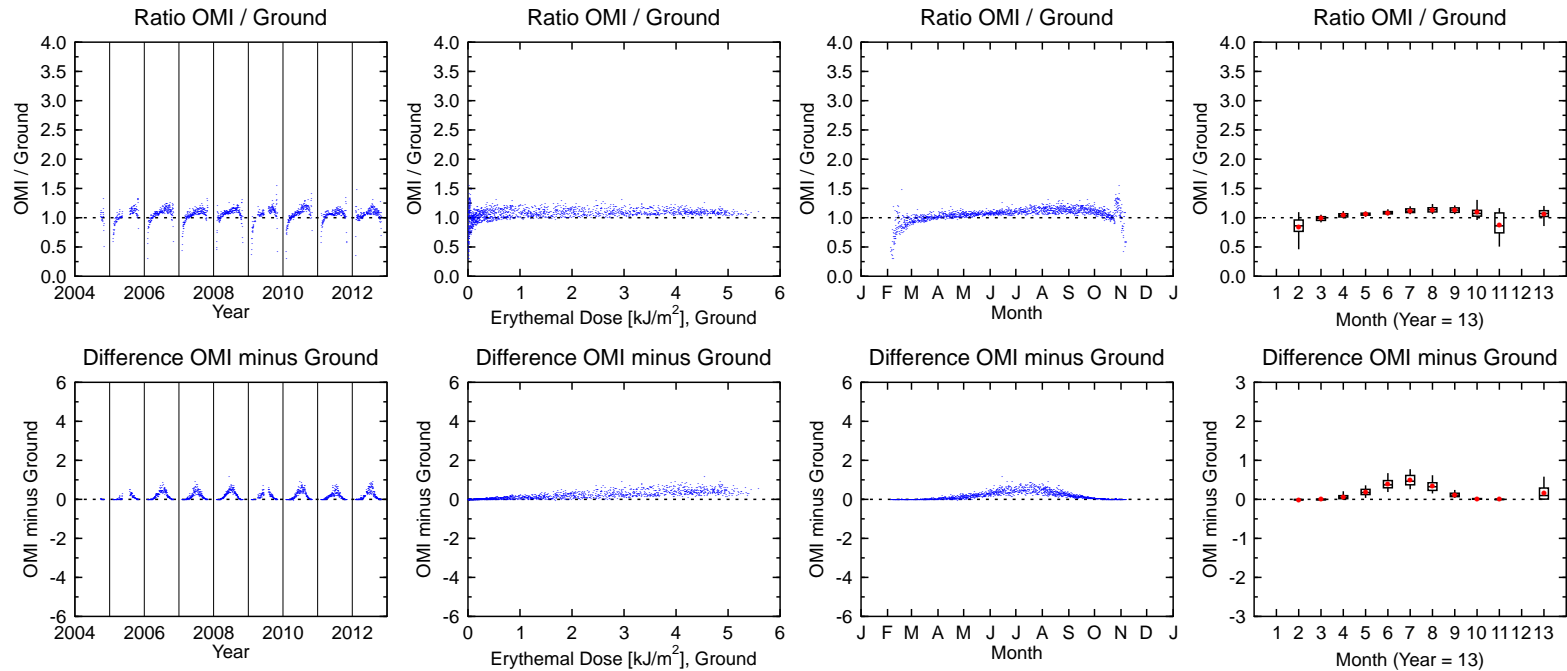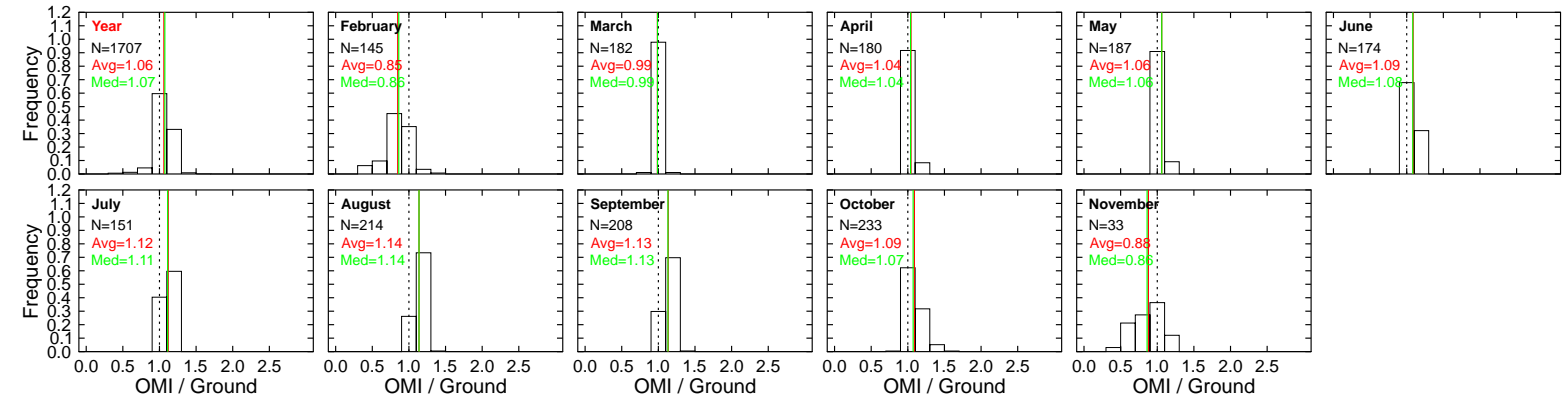

Supplement: Supplementary file 2 [file acp-15-7391-2015-supplement.zip]
