# Supplementary material for: Comparison of OMI UV observations with ground-based measurements at high northern latitudes
Source: Copernicus journal article supplement (doi:10.5194/acp-15-7391-2015), 2015-07-09

Summit, Greenland (72.58°N, 38.46°E)

CSEDRate (Ground at local solar noon), SZA less than 84, Dist less than 12 km

| Month     | N    | Minimum | 5%   | 25%  | Median | Average | 75%  | 95%  | Maximum | W10 | W20 | W30 |
|-----------|------|---------|------|------|--------|---------|------|------|---------|-----|-----|-----|
| January   | 0    | 0.00    | 0.00 | 0.00 | 0.00   | 0.00    | 0.00 | 0.00 | 0.00    | 0   | 0   | 0   |
| February  | 68   | 0.87    | 0.90 | 0.94 | 0.98   | 0.99    | 1.03 | 1.07 | 1.13    | 91  | 100 | 100 |
| March     | 356  | 0.92    | 0.95 | 0.98 | 1.01   | 1.02    | 1.04 | 1.13 | 1.25    | 92  | 99  | 100 |
| April     | 353  | 0.94    | 0.99 | 1.03 | 1.05   | 1.06    | 1.08 | 1.18 | 1.28    | 83  | 96  | 100 |
| May       | 341  | 0.98    | 1.02 | 1.04 | 1.07   | 1.07    | 1.09 | 1.16 | 1.27    | 84  | 98  | 100 |
| June      | 285  | 1.00    | 1.03 | 1.06 | 1.08   | 1.09    | 1.10 | 1.17 | 1.49    | 73  | 98  | 100 |
| July      | 264  | 0.98    | 1.03 | 1.07 | 1.10   | 1.11    | 1.15 | 1.25 | 1.37    | 52  | 88  | 99  |
| August    | 360  | 1.00    | 1.05 | 1.08 | 1.13   | 1.14    | 1.18 | 1.26 | 1.38    | 39  | 84  | 98  |
| September | 356  | 0.98    | 1.05 | 1.10 | 1.15   | 1.15    | 1.20 | 1.28 | 1.40    | 26  | 76  | 97  |
| October   | 227  | 0.96    | 1.02 | 1.07 | 1.10   | 1.11    | 1.14 | 1.24 | 1.30    | 51  | 92  | 100 |
| November  | 0    | 0.00    | 0.00 | 0.00 | 0.00   | 0.00    | 0.00 | 0.00 | 0.00    | 0   | 0   | 0   |
| December  | 0    | 0.00    | 0.00 | 0.00 | 0.00   | 0.00    | 0.00 | 0.00 | 0.00    | 0   | 0   | 0   |
| Year      | 2610 | 0.87    | 0.98 | 1.04 | 1.08   | 1.09    | 1.13 | 1.23 | 1.49    | 64  | 91  | 99  |

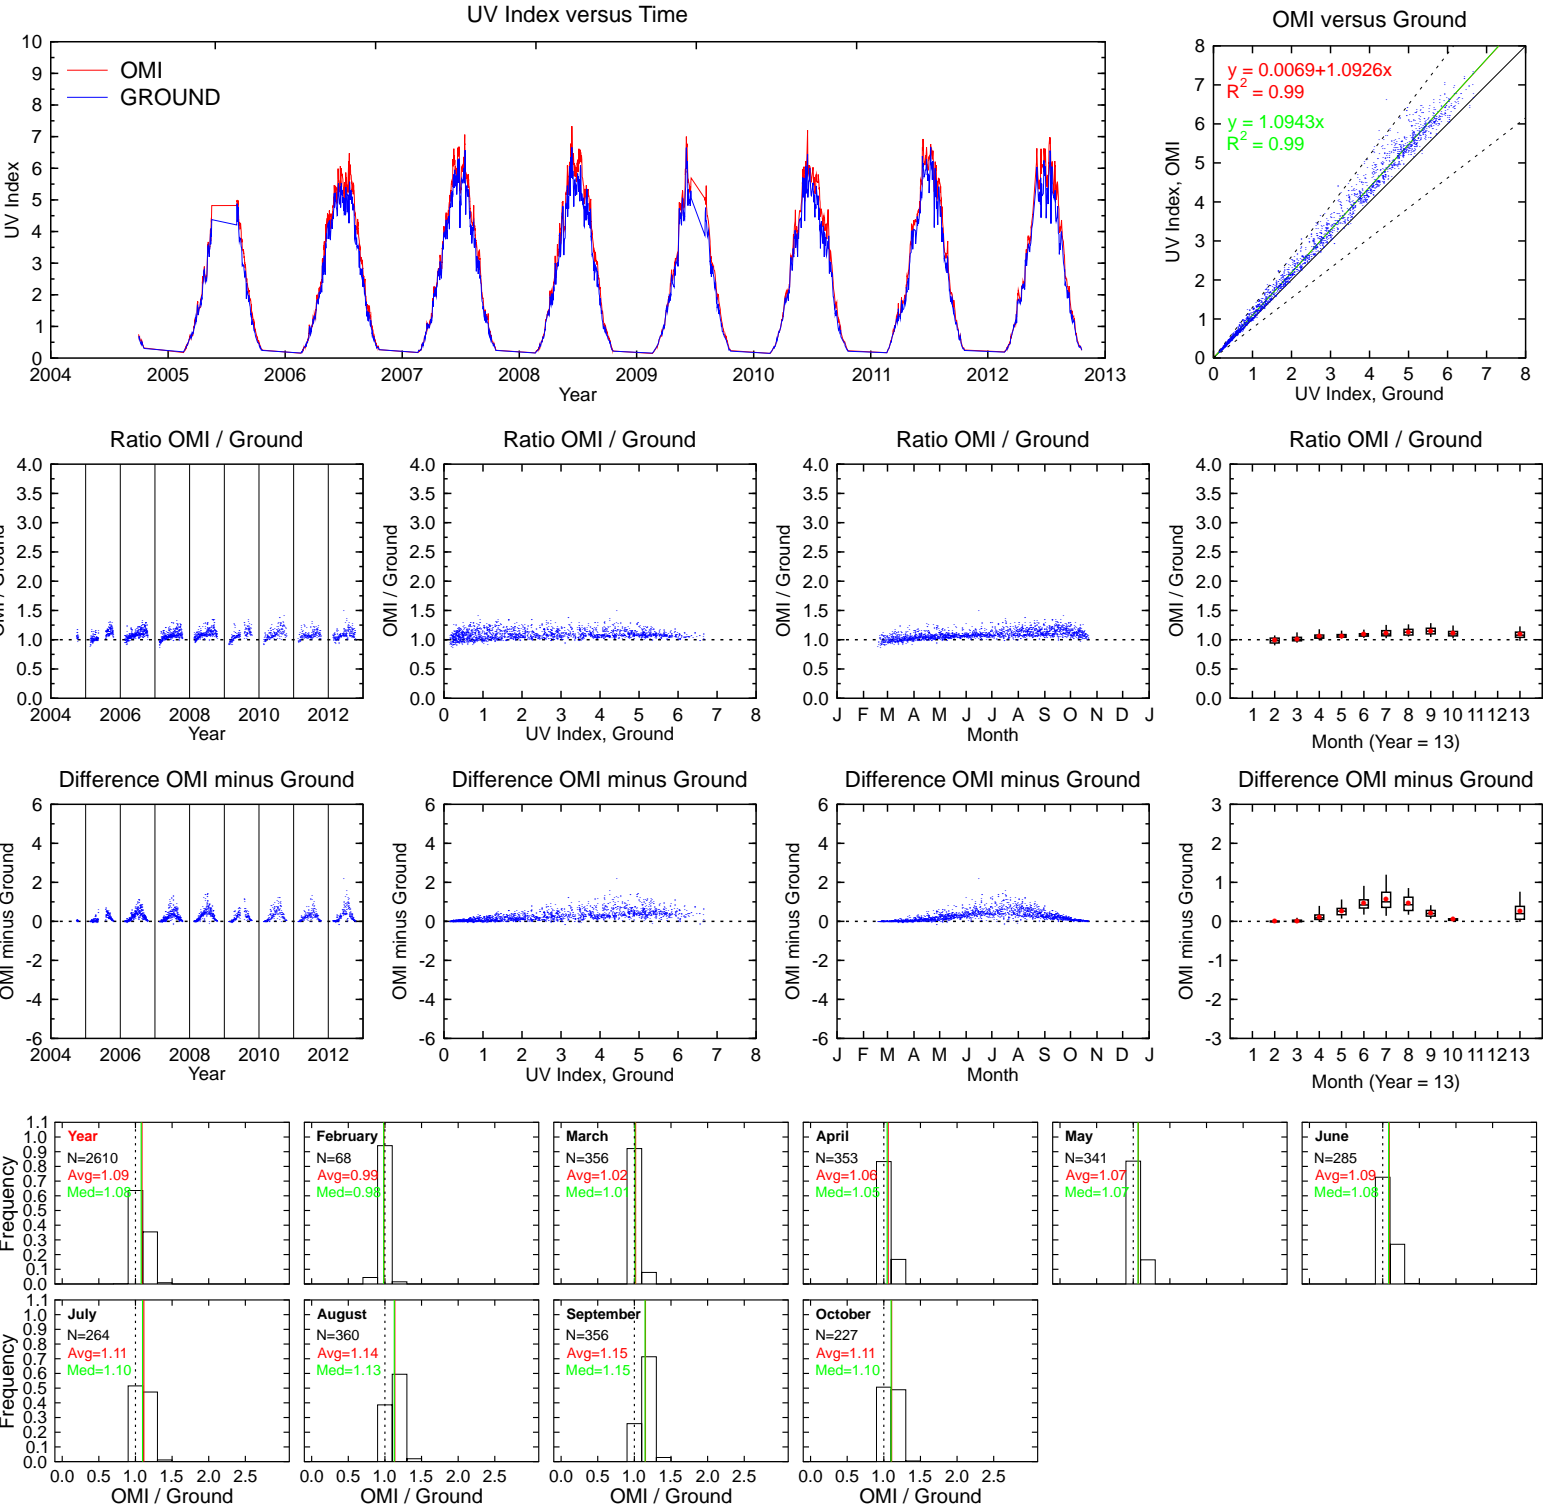

Supplement: Supplementary file 3 [file acp-15-7391-2015-supplement.zip]
