# Supplementary material for: Comparison of OMI UV observations with ground-based measurements at high northern latitudes
Source: Copernicus journal article supplement (doi:10.5194/acp-15-7391-2015), 2015-07-09

Resolute, Canada (74.72°N, 94.98°E)  
OPEDRate, SZA less than 84, Dist less than 12 km

| Month     | N   | Minimum | 5%   | 25%  | Median | Average | 75%  | 95%  | Maximum | W10 | W20 | W30 |
|-----------|-----|---------|------|------|--------|---------|------|------|---------|-----|-----|-----|
| January   | 0   | 0.00    | 0.00 | 0.00 | 0.00   | 0.00    | 0.00 | 0.00 | 0.00    | 0   | 0   | 0   |
| February  | 4   | 1.26    | 1.26 | 1.27 | 1.27   | 1.27    | 1.28 | 1.29 | 1.29    | 0   | 0   | 100 |
| March     | 78  | 1.06    | 1.10 | 1.17 | 1.24   | 1.24    | 1.29 | 1.38 | 1.88    | 5   | 35  | 78  |
| April     | 100 | 0.80    | 0.97 | 1.09 | 1.13   | 1.12    | 1.16 | 1.24 | 1.31    | 28  | 87  | 99  |
| May       | 86  | 0.78    | 0.96 | 1.09 | 1.14   | 1.19    | 1.22 | 1.51 | 2.57    | 28  | 69  | 84  |
| June      | 124 | 0.86    | 1.14 | 1.24 | 1.36   | 1.58    | 1.69 | 2.73 | 5.26    | 3   | 17  | 36  |
| July      | 126 | 0.95    | 1.12 | 1.19 | 1.25   | 1.30    | 1.34 | 1.72 | 2.15    | 4   | 29  | 69  |
| August    | 196 | 0.37    | 0.77 | 1.09 | 1.18   | 1.25    | 1.31 | 2.02 | 3.08    | 17  | 49  | 70  |
| September | 182 | 0.41    | 0.58 | 0.81 | 1.11   | 1.11    | 1.27 | 1.77 | 6.07    | 16  | 38  | 59  |
| October   | 40  | 0.50    | 0.65 | 0.77 | 0.90   | 0.94    | 1.08 | 1.45 | 1.59    | 18  | 48  | 65  |
| November  | 0   | 0.00    | 0.00 | 0.00 | 0.00   | 0.00    | 0.00 | 0.00 | 0.00    | 0   | 0   | 0   |
| December  | 0   | 0.00    | 0.00 | 0.00 | 0.00   | 0.00    | 0.00 | 0.00 | 0.00    | 0   | 0   | 0   |
| Year      | 936 | 0.37    | 0.73 | 1.10 | 1.19   | 1.24    | 1.31 | 1.90 | 6.07    | 14  | 45  | 68  |

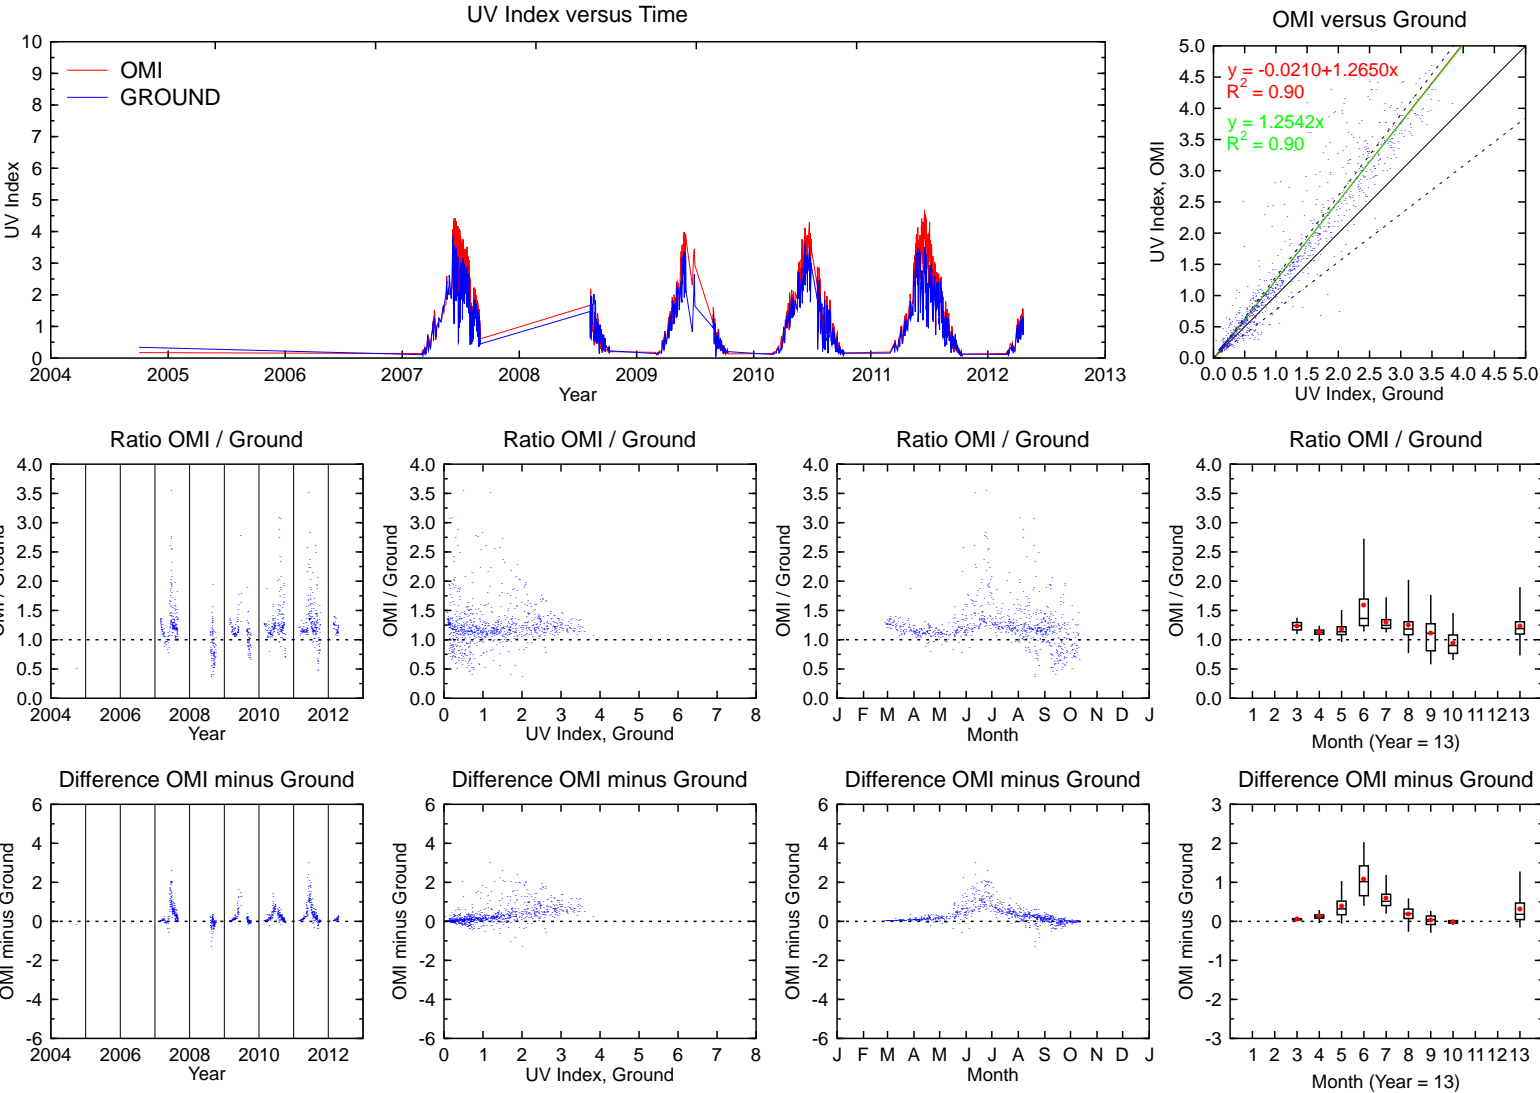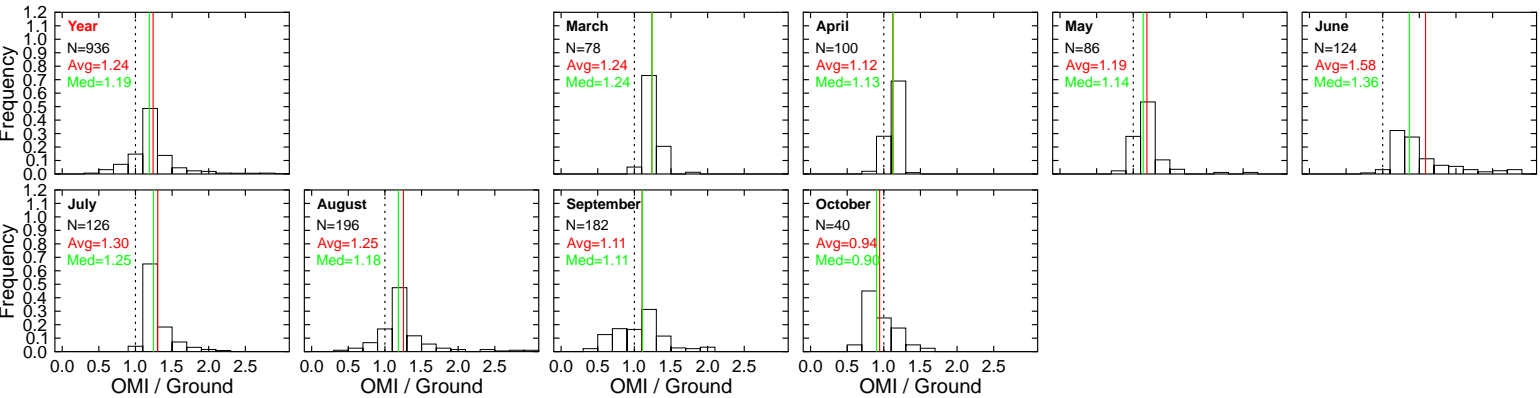

Supplement: Supplementary file 4 [file acp-15-7391-2015-supplement.zip]
