# Supplementary material for: Comparison of OMI UV observations with ground-based measurements at high northern latitudes
Source: Copernicus journal article supplement (doi:10.5194/acp-15-7391-2015), 2015-07-09

Sodankyla, Finland (67.37°N, 26.63°E)

EDDose, all data

| Month     | N    | Minimum | 5%   | 25%  | Median | Average | 75%  | 95%  | Maximum | W10 | W20 | W30 |
|-----------|------|---------|------|------|--------|---------|------|------|---------|-----|-----|-----|
| January   | 15   | 0.58    | 0.58 | 1.14 | 1.40   | 1.46    | 1.94 | 2.37 | 2.37    | 0   | 20  | 33  |
| February  | 164  | 0.60    | 0.98 | 1.09 | 1.16   | 1.23    | 1.30 | 1.73 | 2.29    | 27  | 61  | 74  |
| March     | 170  | 0.86    | 0.98 | 1.08 | 1.12   | 1.15    | 1.18 | 1.41 | 2.02    | 38  | 78  | 91  |
| April     | 172  | 0.92    | 0.94 | 1.05 | 1.12   | 1.16    | 1.20 | 1.54 | 2.30    | 41  | 74  | 88  |
| May       | 177  | 0.67    | 0.80 | 0.96 | 1.10   | 1.11    | 1.22 | 1.51 | 1.80    | 38  | 64  | 84  |
| June      | 176  | 0.66    | 0.88 | 0.99 | 1.07   | 1.07    | 1.14 | 1.31 | 1.65    | 53  | 88  | 94  |
| July      | 190  | 0.77    | 0.87 | 0.98 | 1.05   | 1.07    | 1.13 | 1.31 | 1.76    | 62  | 84  | 93  |
| August    | 190  | 0.73    | 0.92 | 1.02 | 1.08   | 1.09    | 1.14 | 1.29 | 1.72    | 55  | 84  | 95  |
| September | 181  | 0.71    | 0.96 | 1.06 | 1.12   | 1.16    | 1.20 | 1.46 | 2.52    | 39  | 74  | 86  |
| October   | 207  | 0.58    | 0.77 | 0.94 | 1.12   | 1.14    | 1.26 | 1.64 | 2.42    | 25  | 55  | 72  |
| November  | 68   | 0.57    | 0.60 | 0.81 | 0.99   | 1.14    | 1.31 | 1.95 | 3.08    | 28  | 37  | 54  |
| December  | 0    | 0.00    | 0.00 | 0.00 | 0.00   | 0.00    | 0.00 | 0.00 | 0.00    | 0   | 0   | 0   |
| Year      | 1710 | 0.57    | 0.86 | 1.02 | 1.10   | 1.13    | 1.20 | 1.52 | 3.08    | 41  | 71  | 84  |

Erythemal Dose [kJ/m<sup>2</sup>] versus Time

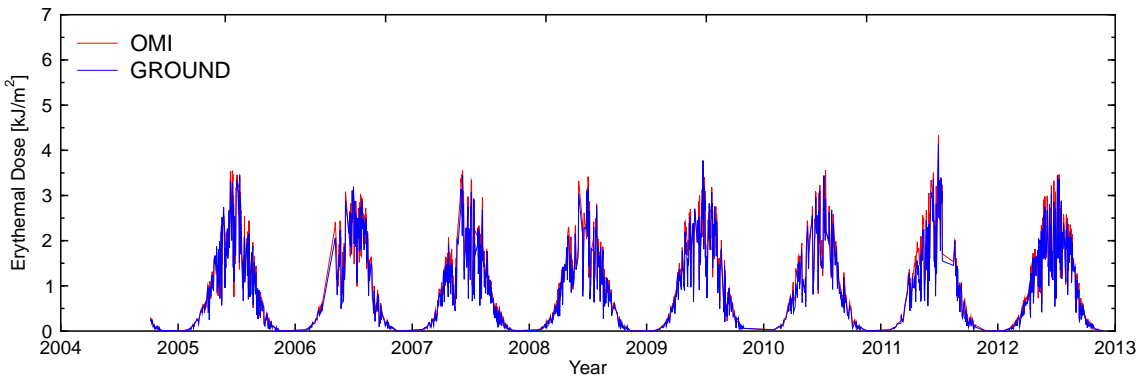

OMI versus Ground

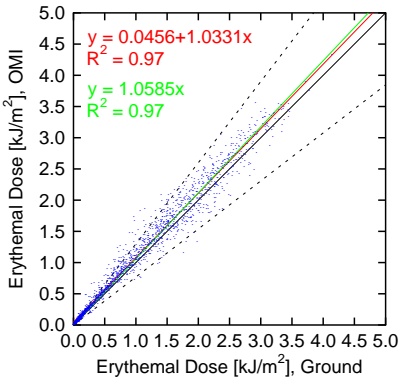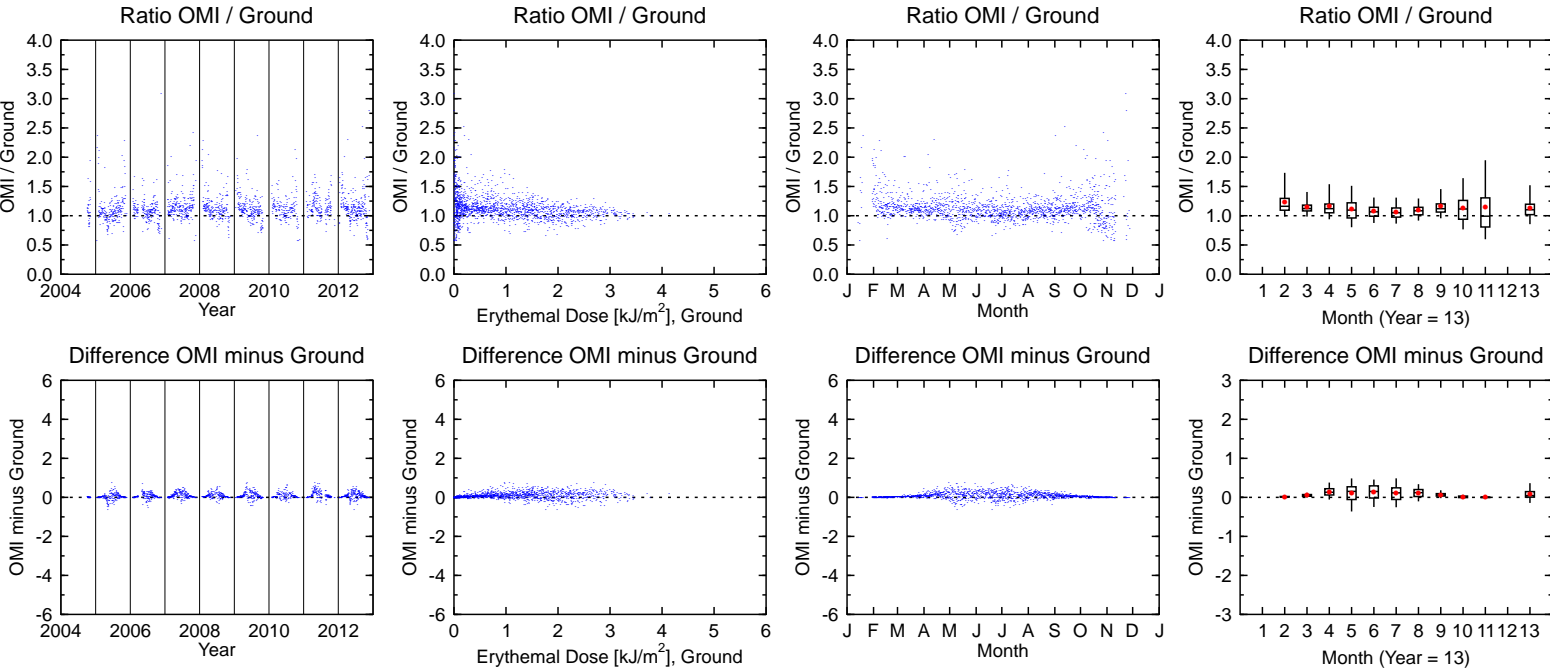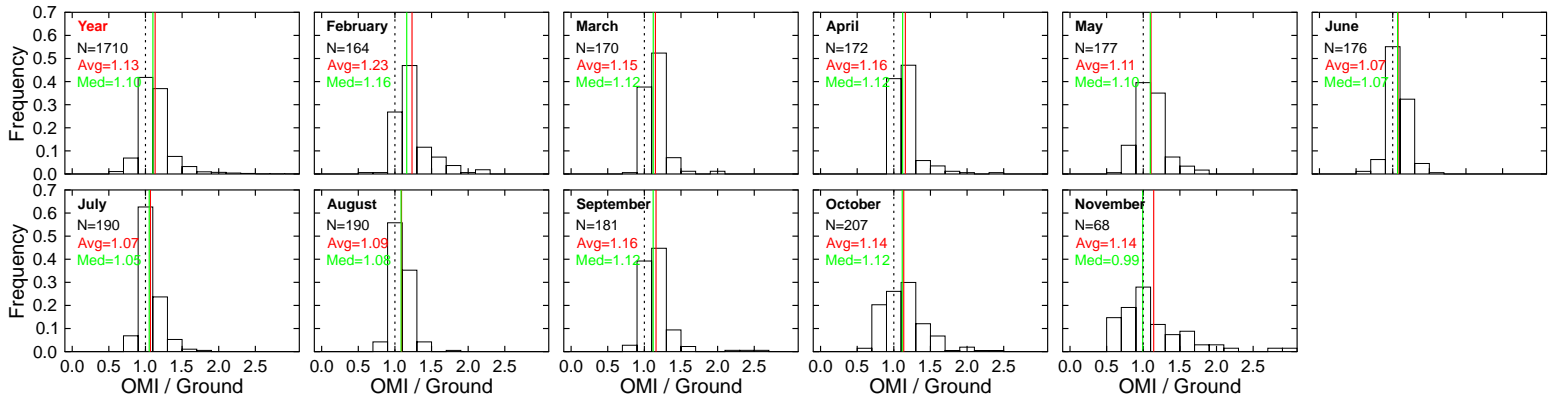

Supplement: Supplementary file 5 [file acp-15-7391-2015-supplement.zip]
