# Supplementary material for: Comparison of OMI UV observations with ground-based measurements at high northern latitudes
Source: Copernicus journal article supplement (doi:10.5194/acp-15-7391-2015), 2015-07-09

Jokioinen, Finland (60.82°N, 23.5°E)  
EDDose, SZA less than 84, Dist less than 12 km

| Month     | N    | Minimum | 5%   | 25%  | Median | Average | 75%  | 95%  | Maximum | W10 | W20 | W30 |
|-----------|------|---------|------|------|--------|---------|------|------|---------|-----|-----|-----|
| January   | 135  | 0.37    | 0.53 | 0.67 | 0.81   | 0.92    | 1.06 | 1.80 | 2.49    | 21  | 32  | 45  |
| February  | 125  | 0.41    | 0.54 | 0.67 | 0.79   | 0.80    | 0.87 | 1.24 | 1.37    | 10  | 29  | 50  |
| March     | 121  | 0.57    | 0.64 | 0.72 | 0.82   | 0.90    | 0.96 | 1.46 | 1.85    | 19  | 32  | 52  |
| April     | 145  | 0.48    | 0.68 | 0.98 | 1.04   | 1.06    | 1.14 | 1.45 | 1.96    | 52  | 70  | 81  |
| May       | 162  | 0.67    | 0.83 | 0.96 | 1.04   | 1.05    | 1.11 | 1.32 | 1.73    | 59  | 84  | 91  |
| June      | 142  | 0.57    | 0.75 | 0.94 | 1.02   | 1.03    | 1.08 | 1.37 | 1.78    | 60  | 75  | 87  |
| July      | 164  | 0.52    | 0.78 | 0.92 | 0.99   | 1.00    | 1.07 | 1.22 | 1.61    | 53  | 84  | 93  |
| August    | 162  | 0.59    | 0.79 | 0.94 | 1.02   | 1.04    | 1.13 | 1.35 | 1.99    | 53  | 80  | 87  |
| September | 135  | 0.54    | 0.80 | 0.98 | 1.05   | 1.07    | 1.13 | 1.42 | 1.95    | 50  | 80  | 87  |
| October   | 168  | 0.56    | 0.81 | 0.98 | 1.06   | 1.11    | 1.19 | 1.53 | 2.44    | 47  | 70  | 81  |
| November  | 121  | 0.27    | 0.48 | 0.75 | 0.99   | 1.03    | 1.21 | 1.73 | 2.84    | 26  | 41  | 53  |
| December  | 49   | 0.23    | 0.53 | 0.66 | 0.88   | 1.01    | 1.12 | 1.98 | 3.58    | 20  | 31  | 41  |
| Year      | 1629 | 0.23    | 0.61 | 0.86 | 1.01   | 1.01    | 1.12 | 1.46 | 3.58    | 42  | 63  | 74  |

Erythemal Dose [kJ/m<sup>2</sup>] versus Time

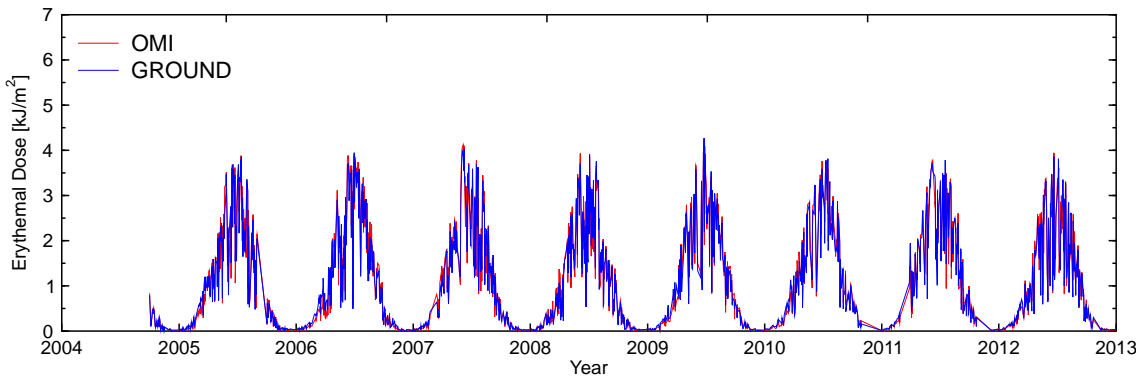

OMI versus Ground

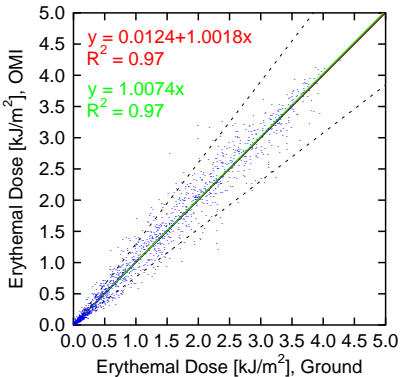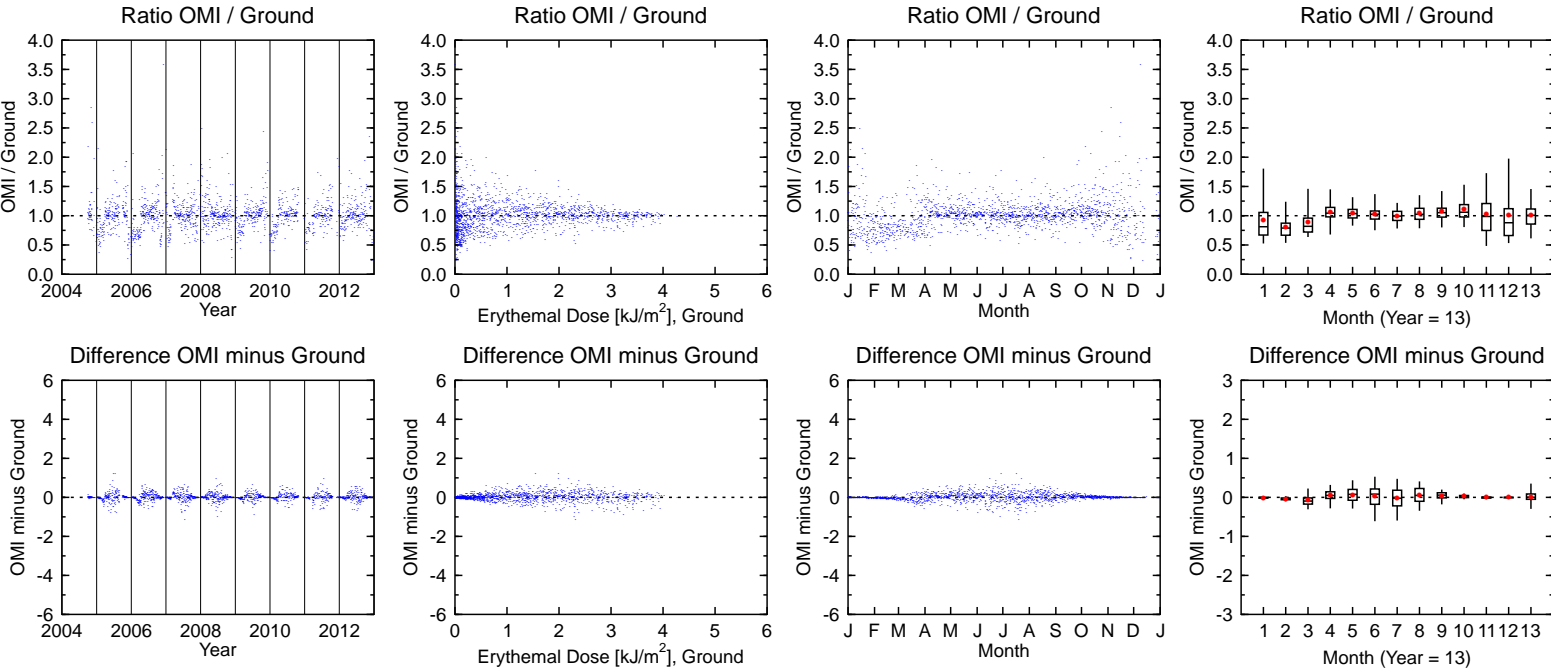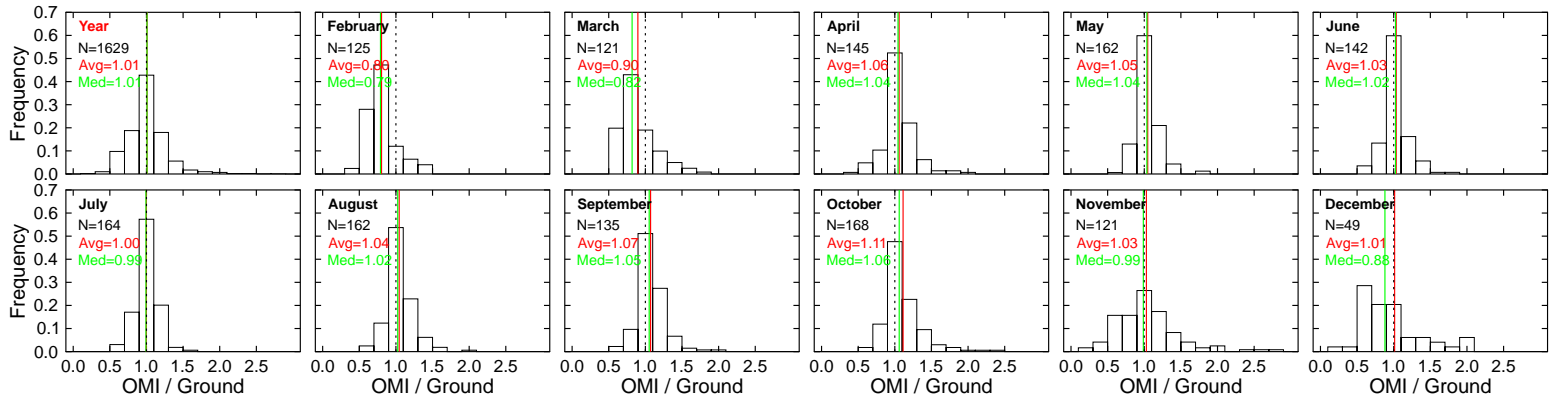

Supplement: Supplementary file 6 [file acp-15-7391-2015-supplement.zip]
