# Supplementary material for: Comparison of OMI UV observations with ground-based measurements at high northern latitudes
Source: Copernicus journal article supplement (doi:10.5194/acp-15-7391-2015), 2015-07-09
Supplement: Supplementary file 8 [file acp-15-7391-2015-supplement.zip]

Resolute, Canada (74.72°N, 94.98°E)

EDRate (Ground at local solar noon), SZA less than 84, Dist less than 12 km

| Month     | N    | Minimum | 5%   | 25%  | Median | Average | 75%  | 95%  | Maximum | W10 | W20 | W30 |
|-----------|------|---------|------|------|--------|---------|------|------|---------|-----|-----|-----|
| January   | 0    | 0.00    | 0.00 | 0.00 | 0.00   | 0.00    | 0.00 | 0.00 | 0.00    | 0   | 0   | 0   |
| February  | 4    | 1.10    | 1.10 | 1.10 | 1.17   | 1.18    | 1.24 | 1.29 | 1.29    | 0   | 50  | 100 |
| March     | 80   | 0.98    | 1.01 | 1.05 | 1.09   | 1.10    | 1.13 | 1.24 | 1.39    | 54  | 90  | 98  |
| April     | 101  | 0.82    | 0.96 | 1.03 | 1.08   | 1.07    | 1.11 | 1.20 | 1.41    | 65  | 94  | 99  |
| May       | 88   | 0.78    | 0.91 | 1.07 | 1.11   | 1.14    | 1.20 | 1.49 | 2.41    | 42  | 70  | 89  |
| June      | 146  | 0.75    | 1.12 | 1.24 | 1.33   | 1.58    | 1.61 | 3.06 | 5.17    | 3   | 18  | 37  |
| July      | 150  | 0.45    | 0.89 | 1.17 | 1.23   | 1.34    | 1.41 | 1.89 | 4.00    | 7   | 34  | 61  |
| August    | 210  | 0.38    | 0.75 | 1.08 | 1.23   | 1.34    | 1.48 | 2.19 | 4.35    | 14  | 31  | 56  |
| September | 184  | 0.48    | 0.58 | 0.81 | 1.09   | 1.10    | 1.28 | 1.86 | 2.53    | 18  | 37  | 59  |
| October   | 42   | 0.37    | 0.51 | 0.75 | 0.89   | 0.91    | 1.07 | 1.27 | 1.74    | 24  | 55  | 67  |
| November  | 0    | 0.00    | 0.00 | 0.00 | 0.00   | 0.00    | 0.00 | 0.00 | 0.00    | 0   | 0   | 0   |
| December  | 0    | 0.00    | 0.00 | 0.00 | 0.00   | 0.00    | 0.00 | 0.00 | 0.00    | 0   | 0   | 0   |
| Year      | 1005 | 0.37    | 0.73 | 1.05 | 1.17   | 1.25    | 1.32 | 2.01 | 5.17    | 23  | 46  | 66  |

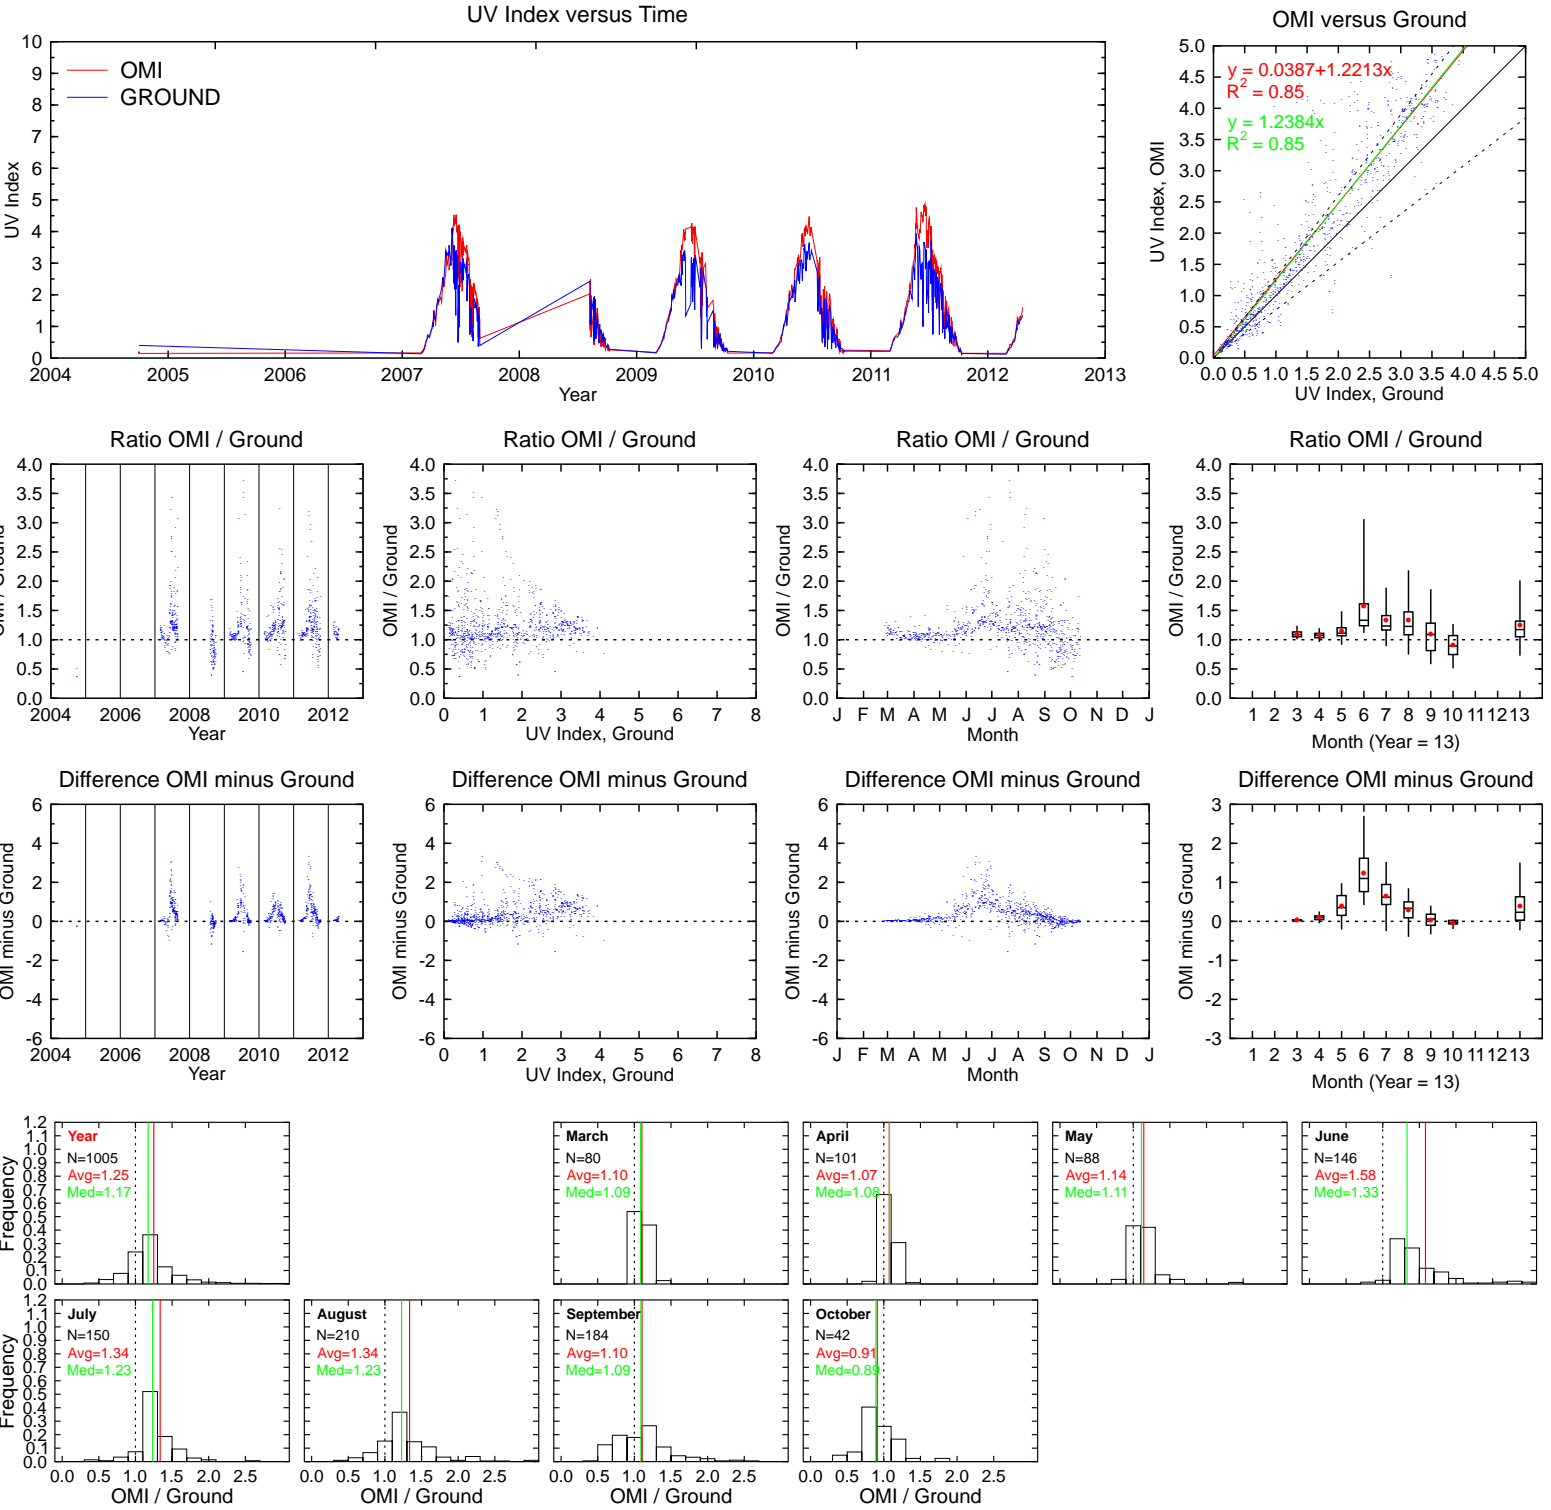

Ratio OMI / Ground

Ratio OMI / Ground

Ratio OMI / Ground

Ratio OMI / Ground

Difference OMI minus Ground

Difference OMI minus Ground

Difference OMI minus Ground

Difference OMI minus Ground

Frequency

March

April

May

June

July

August

September

October
