# Supplementary material for: Comparison of OMI UV observations with ground-based measurements at high northern latitudes
Source: Copernicus journal article supplement (doi:10.5194/acp-15-7391-2015), 2015-07-09

Ny-Alesund, Svalbard (78.92°N, 11.92°E)  
EDDose, SZA less than 84, Dist less than 12 km

| Month     | N    | Minimum | 5%   | 25%  | Median | Average | 75%  | 95%  | Maximum | W10 | W20 | W30 |
|-----------|------|---------|------|------|--------|---------|------|------|---------|-----|-----|-----|
| January   | 0    | 0.00    | 0.00 | 0.00 | 0.00   | 0.00    | 0.00 | 0.00 | 0.00    | 0   | 0   | 0   |
| February  | 0    | 0.00    | 0.00 | 0.00 | 0.00   | 0.00    | 0.00 | 0.00 | 0.00    | 0   | 0   | 0   |
| March     | 138  | 0.21    | 0.30 | 0.41 | 0.60   | 0.59    | 0.74 | 0.96 | 1.23    | 8   | 13  | 20  |
| April     | 213  | 0.19    | 0.26 | 0.46 | 0.58   | 0.56    | 0.69 | 0.79 | 0.86    | 0   | 2   | 7   |
| May       | 201  | 0.16    | 0.42 | 0.52 | 0.60   | 0.61    | 0.68 | 0.84 | 1.17    | 1   | 6   | 10  |
| June      | 188  | 0.41    | 0.55 | 0.69 | 0.79   | 0.81    | 0.91 | 1.09 | 1.34    | 21  | 41  | 54  |
| July      | 204  | 0.72    | 0.79 | 0.91 | 1.01   | 1.04    | 1.15 | 1.39 | 1.80    | 43  | 74  | 87  |
| August    | 196  | 0.62    | 0.71 | 0.97 | 1.06   | 1.07    | 1.18 | 1.37 | 1.66    | 40  | 66  | 82  |
| September | 184  | 0.43    | 0.57 | 0.76 | 0.93   | 0.94    | 1.09 | 1.36 | 1.77    | 29  | 49  | 64  |
| October   | 17   | 0.49    | 0.49 | 0.59 | 0.69   | 0.75    | 0.82 | 1.29 | 1.29    | 12  | 18  | 29  |
| November  | 0    | 0.00    | 0.00 | 0.00 | 0.00   | 0.00    | 0.00 | 0.00 | 0.00    | 0   | 0   | 0   |
| December  | 0    | 0.00    | 0.00 | 0.00 | 0.00   | 0.00    | 0.00 | 0.00 | 0.00    | 0   | 0   | 0   |
| Year      | 1341 | 0.16    | 0.40 | 0.61 | 0.78   | 0.81    | 1.01 | 1.29 | 1.80    | 20  | 36  | 47  |

Erythral Dose [kJ/m<sup>2</sup>] versus Time

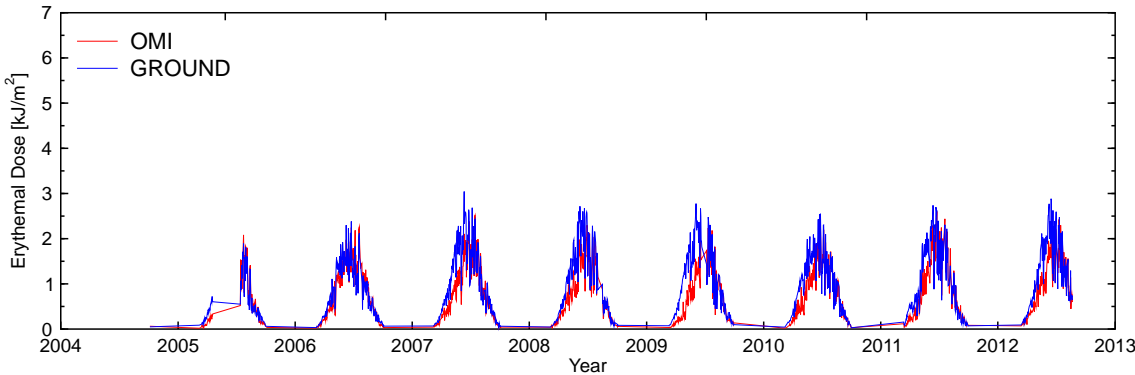

OMI versus Ground

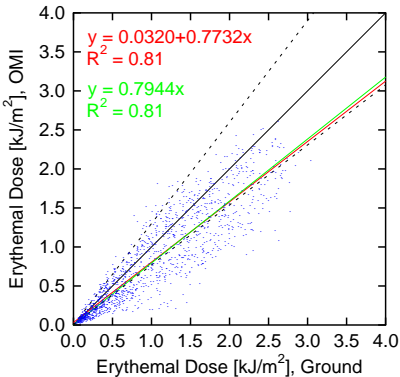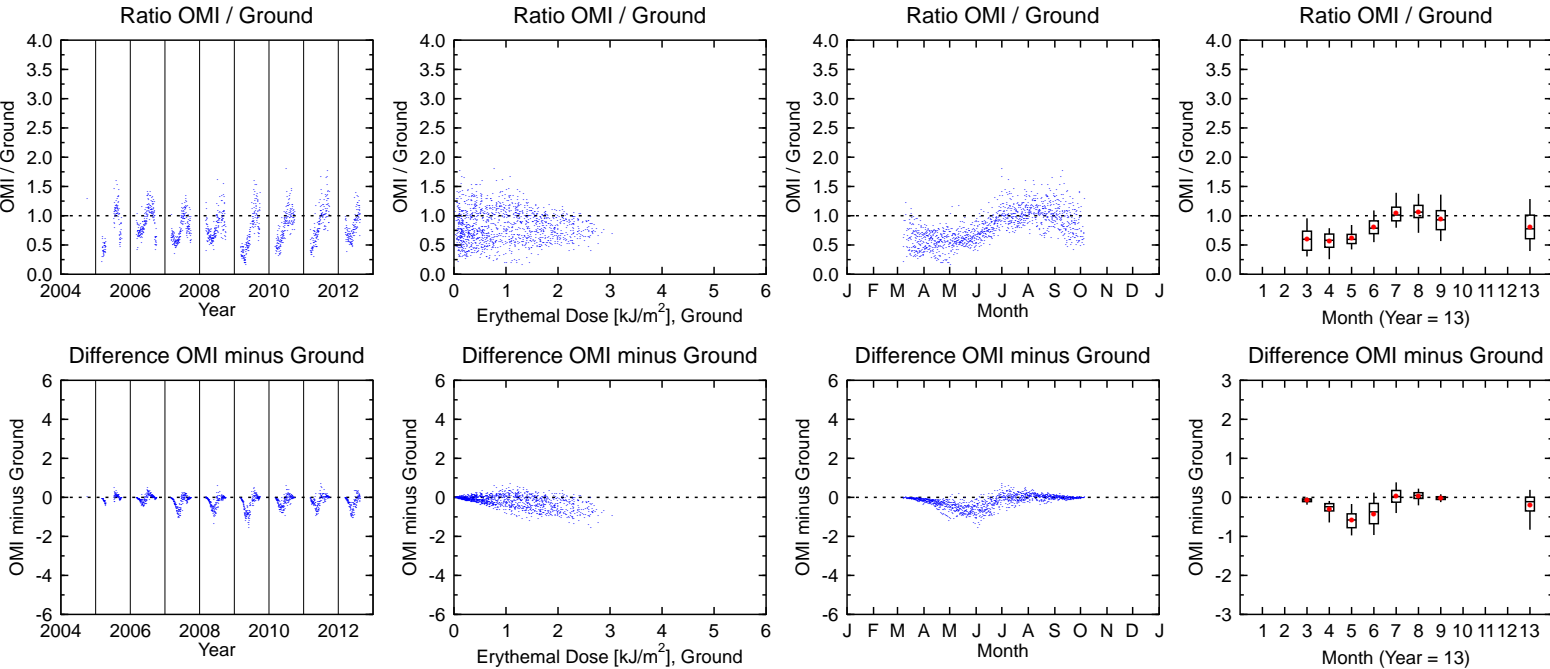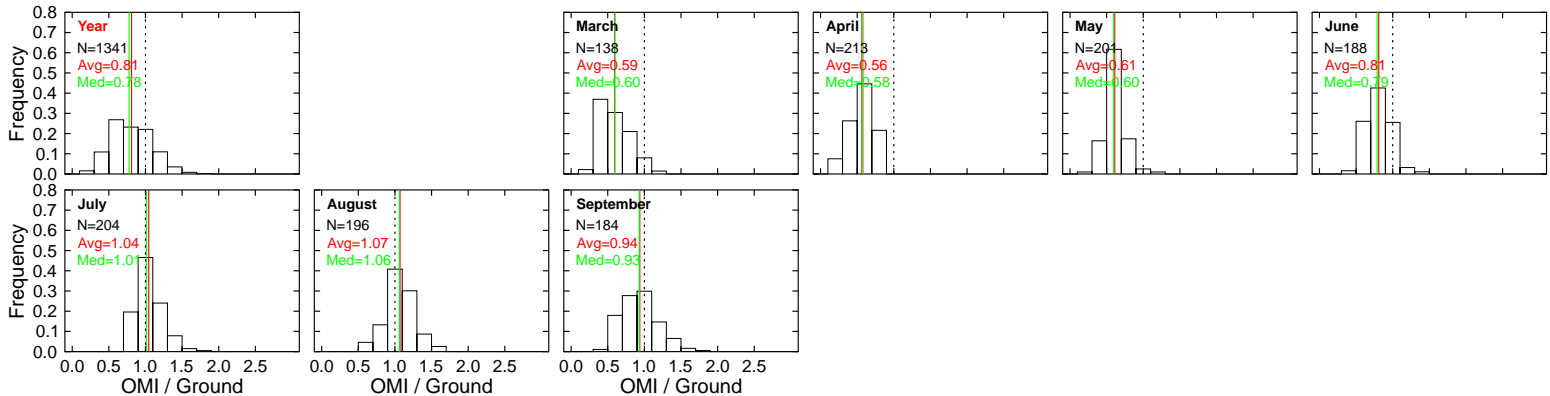

Supplement: Supplementary file 11 [file acp-15-7391-2015-supplement.zip]
