# Supplementary material for: Comparison of OMI UV observations with ground-based measurements at high northern latitudes
Source: Copernicus journal article supplement (doi:10.5194/acp-15-7391-2015), 2015-07-09

Finse, Norway (60.60°N, 7.52°E)  
EDDose, all data

| Month     | N    | Minimum | 5%   | 25%  | Median | Average | 75%  | 95%  | Maximum | W10 | W20 | W30 |
|-----------|------|---------|------|------|--------|---------|------|------|---------|-----|-----|-----|
| January   | 129  | 0.15    | 0.23 | 0.42 | 0.70   | 0.67    | 0.87 | 1.09 | 1.84    | 17  | 33  | 40  |
| February  | 202  | 0.18    | 0.23 | 0.38 | 0.51   | 0.53    | 0.67 | 0.88 | 0.97    | 3   | 6   | 10  |
| March     | 228  | 0.18    | 0.25 | 0.39 | 0.52   | 0.53    | 0.65 | 0.84 | 0.97    | 2   | 5   | 9   |
| April     | 227  | 0.21    | 0.27 | 0.37 | 0.51   | 0.53    | 0.65 | 0.93 | 1.39    | 5   | 7   | 14  |
| May       | 215  | 0.23    | 0.34 | 0.48 | 0.61   | 0.64    | 0.74 | 1.05 | 1.81    | 6   | 12  | 20  |
| June      | 217  | 0.47    | 0.60 | 0.69 | 0.81   | 0.90    | 0.99 | 1.51 | 2.56    | 17  | 35  | 53  |
| July      | 240  | 0.58    | 0.71 | 0.87 | 1.00   | 1.06    | 1.15 | 1.61 | 3.25    | 36  | 61  | 76  |
| August    | 231  | 0.53    | 0.76 | 0.96 | 1.05   | 1.12    | 1.22 | 1.64 | 3.39    | 40  | 65  | 74  |
| September | 189  | 0.34    | 0.68 | 0.93 | 1.06   | 1.12    | 1.24 | 1.65 | 3.44    | 35  | 56  | 70  |
| October   | 236  | 0.20    | 0.36 | 0.52 | 0.80   | 0.91    | 1.13 | 1.71 | 5.64    | 14  | 29  | 36  |
| November  | 193  | 0.14    | 0.26 | 0.46 | 0.63   | 0.70    | 0.81 | 1.38 | 3.98    | 10  | 17  | 26  |
| December  | 136  | 0.11    | 0.24 | 0.73 | 0.93   | 0.89    | 1.09 | 1.34 | 1.79    | 34  | 54  | 68  |
| Year      | 2443 | 0.11    | 0.29 | 0.52 | 0.76   | 0.80    | 1.02 | 1.44 | 5.64    | 18  | 31  | 41  |

Erythemal Dose [kJ/m<sup>2</sup>] versus Time

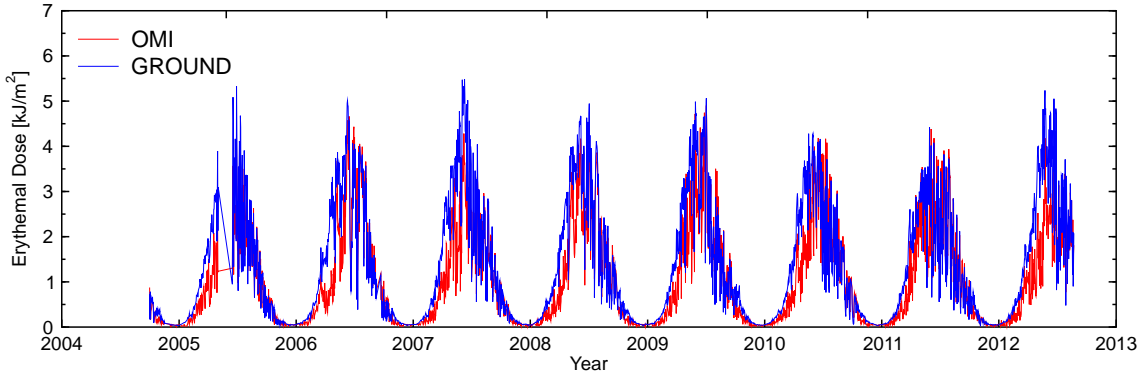

OMI versus Ground

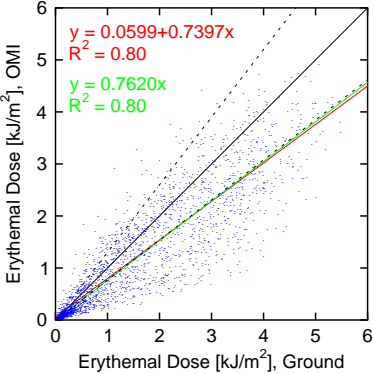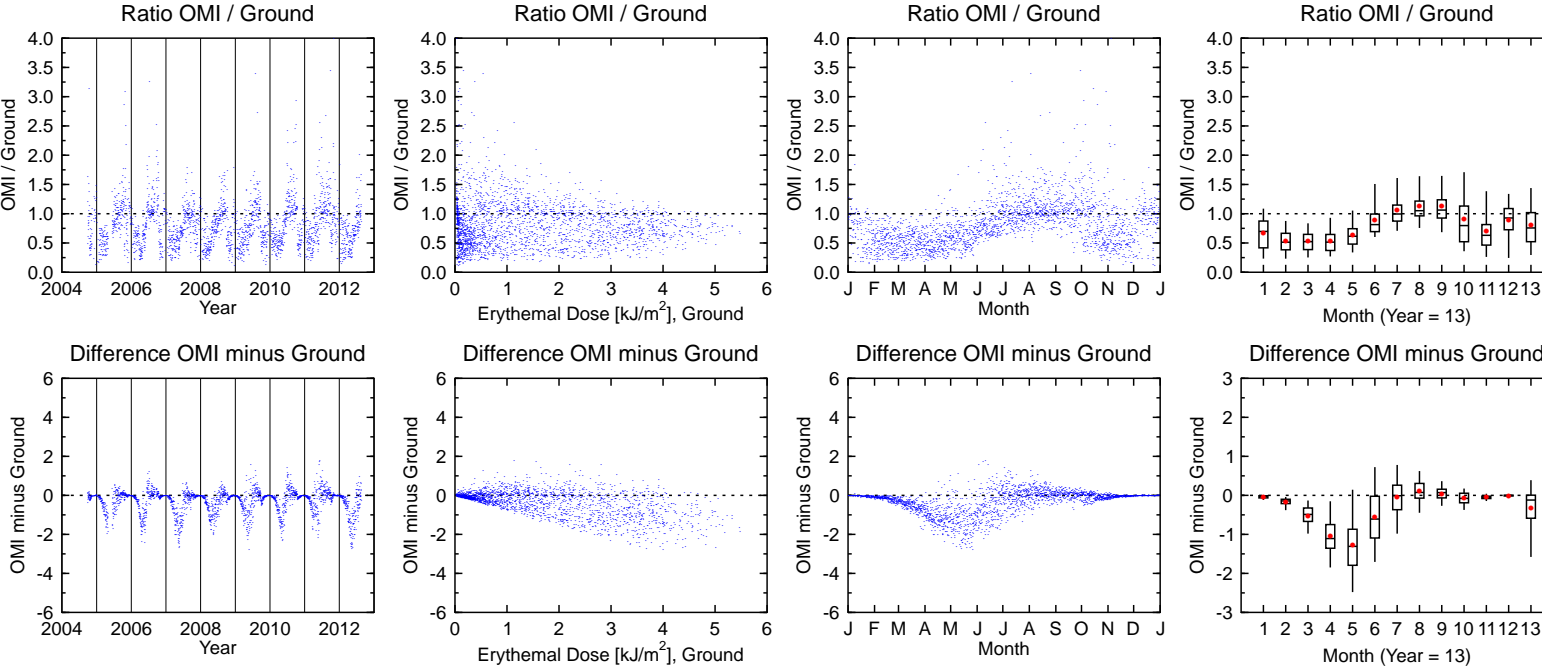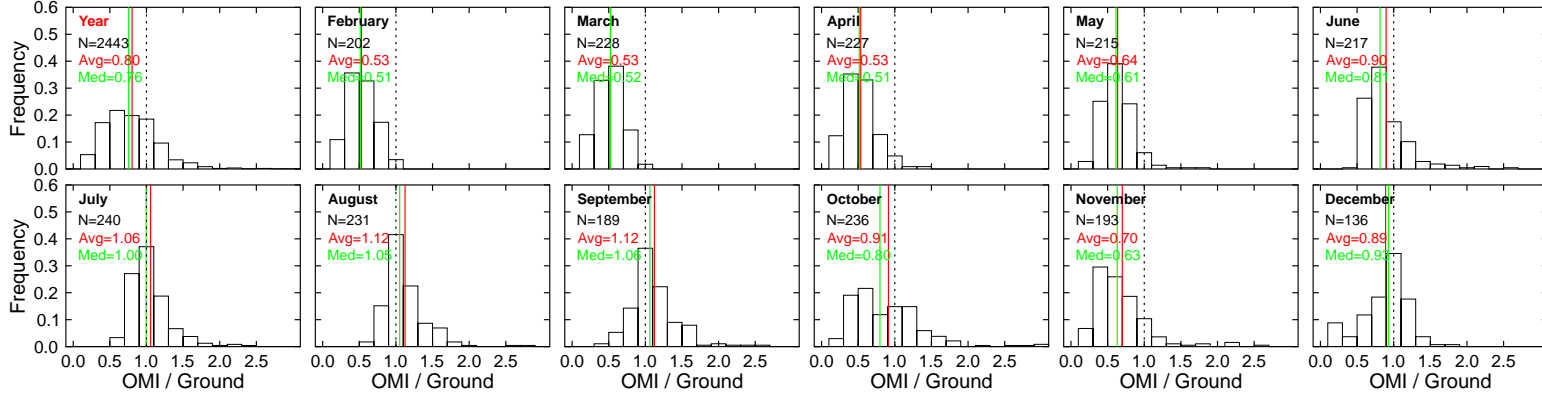

Supplement: Supplementary file 13 [file acp-15-7391-2015-supplement.zip]
