# Supplementary material for: Comparison of OMI UV observations with ground-based measurements at high northern latitudes
Source: Copernicus journal article supplement (doi:10.5194/acp-15-7391-2015), 2015-07-09

Resolute, Canada (74.72°N, 94.98°E)  
CSEDDose, SZA less than 84, Dist less than 12 km

| Month     | N   | Minimum | 5%   | 25%  | Median | Average | 75%  | 95%  | Maximum | W10 | W20 | W30 |
|-----------|-----|---------|------|------|--------|---------|------|------|---------|-----|-----|-----|
| January   | 0   | 0.00    | 0.00 | 0.00 | 0.00   | 0.00    | 0.00 | 0.00 | 0.00    | 0   | 0   | 0   |
| February  | 3   | 1.05    | 1.05 | 1.05 | 1.20   | 1.18    | 1.29 | 1.29 | 1.29    | 33  | 33  | 100 |
| March     | 61  | 0.98    | 1.02 | 1.07 | 1.10   | 1.12    | 1.16 | 1.22 | 1.43    | 48  | 92  | 97  |
| April     | 72  | 1.01    | 1.04 | 1.07 | 1.11   | 1.11    | 1.14 | 1.23 | 1.50    | 42  | 90  | 97  |
| May       | 55  | 1.02    | 1.05 | 1.12 | 1.18   | 1.22    | 1.27 | 1.46 | 2.00    | 18  | 56  | 82  |
| June      | 65  | 1.10    | 1.19 | 1.34 | 1.55   | 1.76    | 1.99 | 2.64 | 6.92    | 2   | 8   | 17  |
| July      | 62  | 1.19    | 1.21 | 1.25 | 1.36   | 1.52    | 1.55 | 2.58 | 2.88    | 0   | 2   | 35  |
| August    | 96  | 1.03    | 1.21 | 1.28 | 1.57   | 1.89    | 2.15 | 4.09 | 6.98    | 2   | 4   | 27  |
| September | 93  | 1.03    | 1.08 | 1.26 | 1.44   | 1.66    | 1.99 | 2.67 | 3.32    | 8   | 18  | 32  |
| October   | 30  | 1.08    | 1.09 | 1.19 | 1.28   | 1.28    | 1.34 | 1.60 | 1.67    | 10  | 30  | 67  |
| November  | 0   | 0.00    | 0.00 | 0.00 | 0.00   | 0.00    | 0.00 | 0.00 | 0.00    | 0   | 0   | 0   |
| December  | 0   | 0.00    | 0.00 | 0.00 | 0.00   | 0.00    | 0.00 | 0.00 | 0.00    | 0   | 0   | 0   |
| Year      | 537 | 0.98    | 1.05 | 1.14 | 1.28   | 1.49    | 1.59 | 2.57 | 6.98    | 15  | 35  | 53  |

Erythemal Dose [kJ/m<sup>2</sup>] versus Time

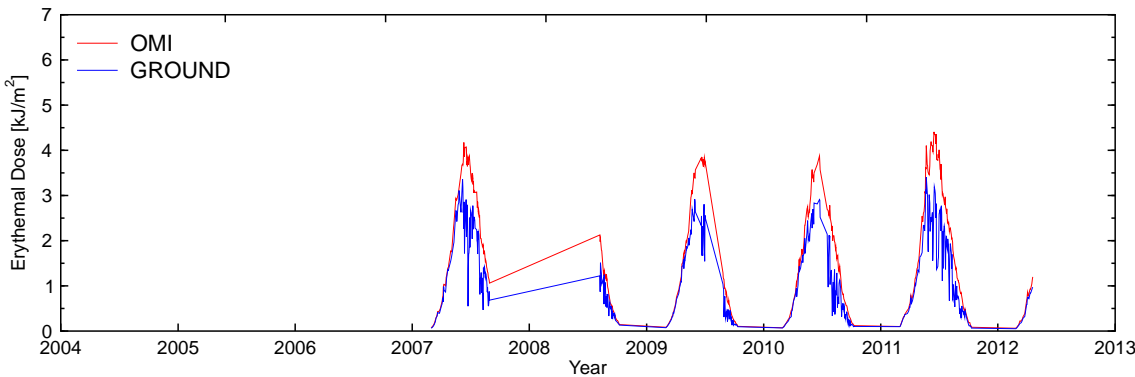

OMI versus Ground

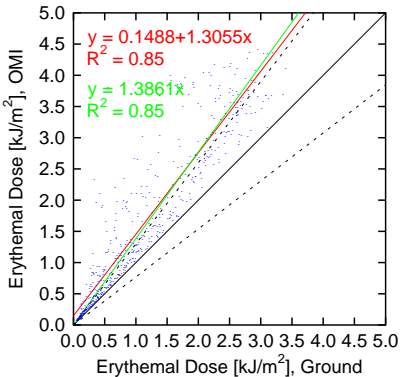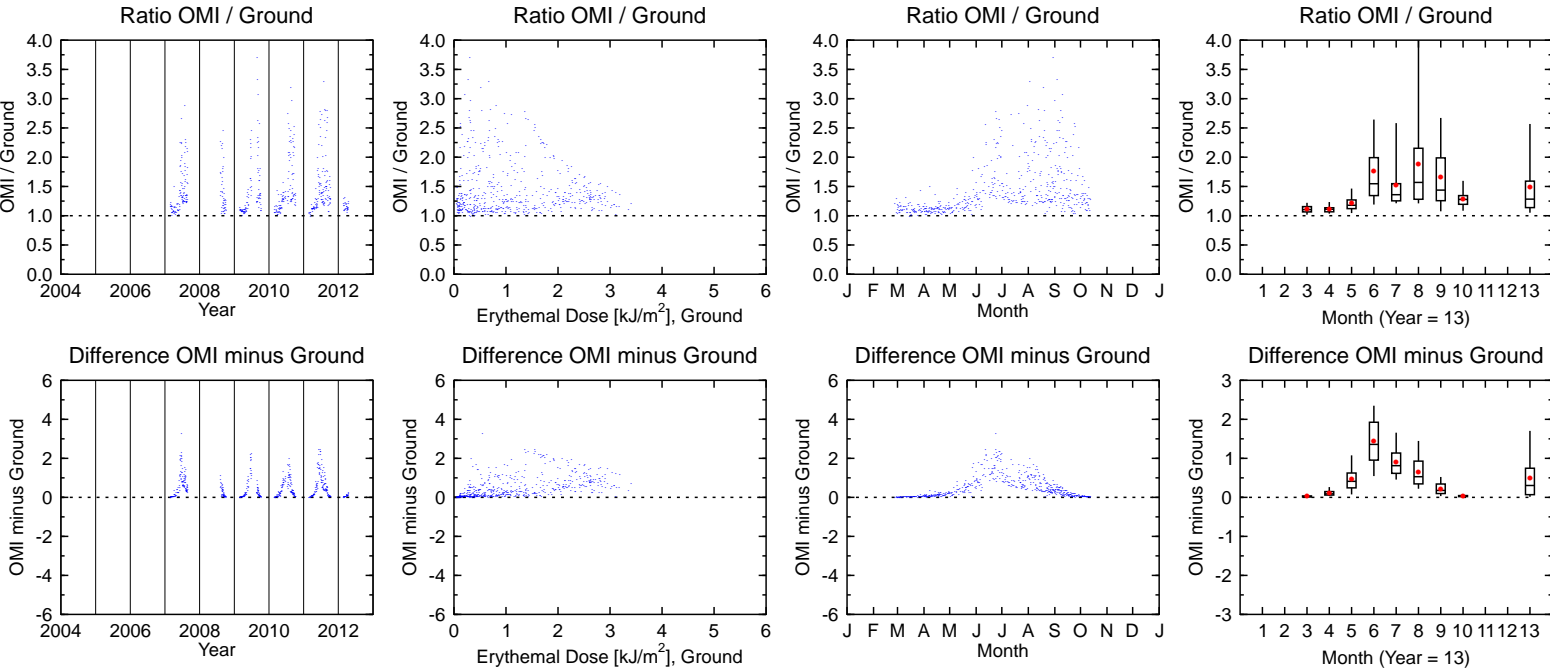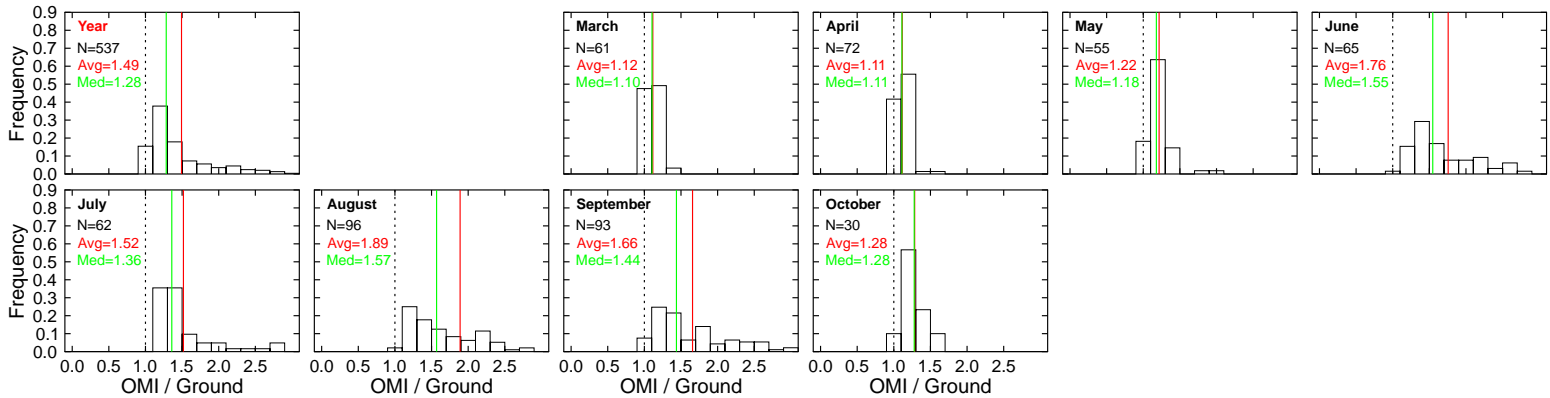

Supplement: Supplementary file 14 [file acp-15-7391-2015-supplement.zip]
