# Supplementary material for: Comparison of OMI UV observations with ground-based measurements at high northern latitudes
Source: Copernicus journal article supplement (doi:10.5194/acp-15-7391-2015), 2015-07-09
Supplement: Supplementary file 16 [file acp-15-7391-2015-supplement.zip]

Alert, Canada (82.5°N, 62.32°E)

CSEDRate (Ground at local solar noon), SZA less than 84, Dist less than 12 km

| Month     | N    | Minimum | 5%   | 25%  | Median | Average | 75%  | 95%  | Maximum | W10 | W20 | W30 |
|-----------|------|---------|------|------|--------|---------|------|------|---------|-----|-----|-----|
| January   | 0    | 0.00    | 0.00 | 0.00 | 0.00   | 0.00    | 0.00 | 0.00 | 0.00    | 0   | 0   | 0   |
| February  | 0    | 0.00    | 0.00 | 0.00 | 0.00   | 0.00    | 0.00 | 0.00 | 0.00    | 0   | 0   | 0   |
| March     | 63   | 0.84    | 0.95 | 1.00 | 1.06   | 1.05    | 1.09 | 1.17 | 1.30    | 75  | 98  | 98  |
| April     | 132  | 0.89    | 0.93 | 0.98 | 1.01   | 1.03    | 1.07 | 1.20 | 1.41    | 79  | 95  | 98  |
| May       | 118  | 0.91    | 0.95 | 1.02 | 1.05   | 1.08    | 1.10 | 1.29 | 1.86    | 72  | 91  | 97  |
| June      | 175  | 0.90    | 0.94 | 1.06 | 1.18   | 1.29    | 1.38 | 2.04 | 3.12    | 31  | 54  | 67  |
| July      | 311  | 0.89    | 1.03 | 1.12 | 1.45   | 1.83    | 2.06 | 4.44 | 7.82    | 21  | 34  | 42  |
| August    | 265  | 0.78    | 0.86 | 1.07 | 1.26   | 1.71    | 2.08 | 4.00 | 5.88    | 21  | 39  | 53  |
| September | 44   | 0.86    | 0.87 | 0.99 | 1.08   | 1.21    | 1.22 | 1.86 | 2.64    | 43  | 70  | 77  |
| October   | 0    | 0.00    | 0.00 | 0.00 | 0.00   | 0.00    | 0.00 | 0.00 | 0.00    | 0   | 0   | 0   |
| November  | 0    | 0.00    | 0.00 | 0.00 | 0.00   | 0.00    | 0.00 | 0.00 | 0.00    | 0   | 0   | 0   |
| December  | 0    | 0.00    | 0.00 | 0.00 | 0.00   | 0.00    | 0.00 | 0.00 | 0.00    | 0   | 0   | 0   |
| Year      | 1108 | 0.78    | 0.94 | 1.04 | 1.14   | 1.47    | 1.54 | 3.12 | 7.82    | 39  | 57  | 66  |

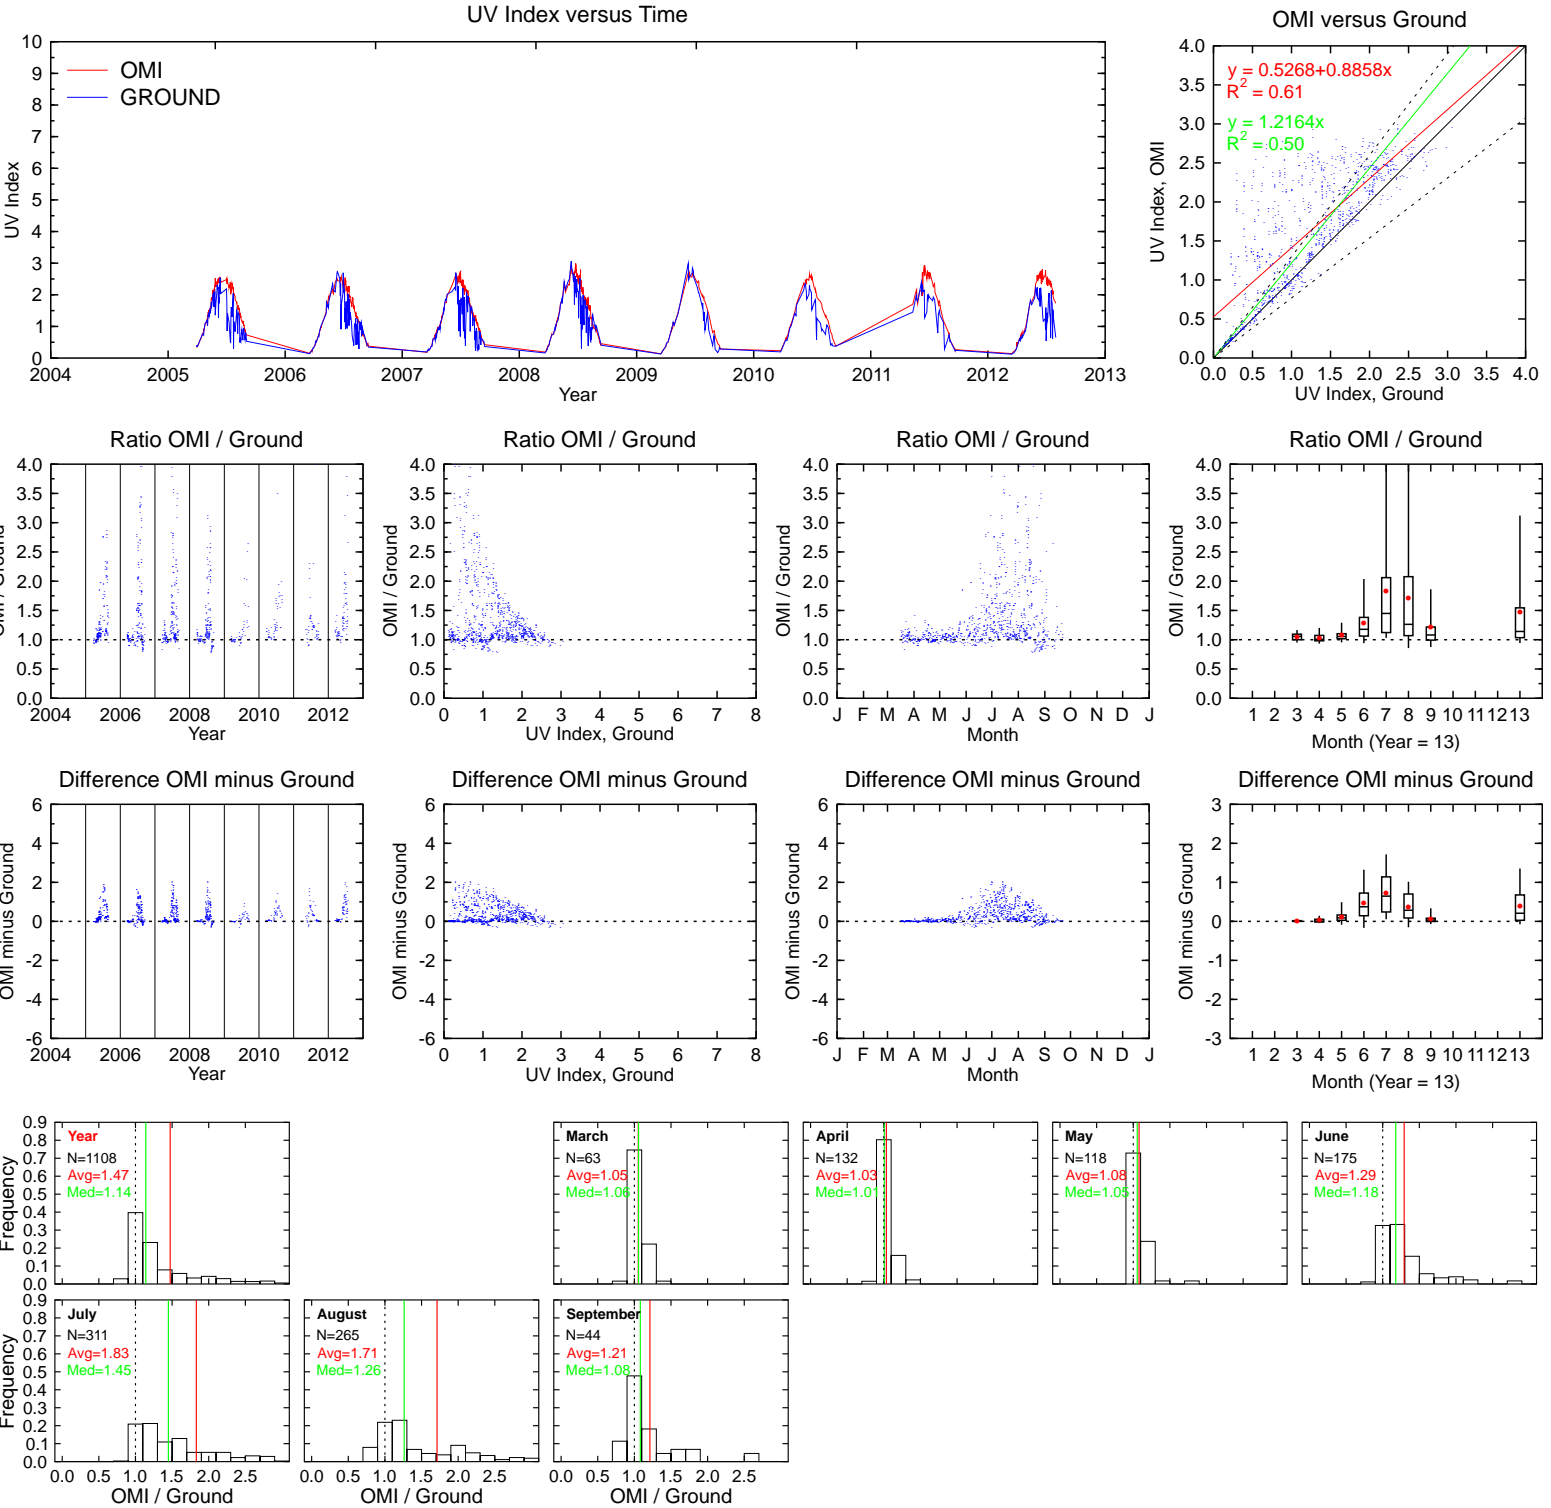

Ratio OMI / Ground

Ratio OMI / Ground

Ratio OMI / Ground

Difference OMI minus Ground

Difference OMI minus Ground

Difference OMI minus Ground

Frequency

March

April

May

June

July

August

September
