# Supplementary material for: Comparison of OMI UV observations with ground-based measurements at high northern latitudes
Source: Copernicus journal article supplement (doi:10.5194/acp-15-7391-2015), 2015-07-09

Andoya, Norway (69.28°N, 16.01°E)  
EDDose, SZA less than 84, Dist less than 12 km

| Month     | N    | Minimum | 5%   | 25%  | Median | Average | 75%  | 95%  | Maximum | W10 | W20 | W30 |
|-----------|------|---------|------|------|--------|---------|------|------|---------|-----|-----|-----|
| January   | 0    | 0.00    | 0.00 | 0.00 | 0.00   | 0.00    | 0.00 | 0.00 | 0.00    | 0   | 0   | 0   |
| February  | 96   | 0.36    | 0.63 | 0.90 | 1.06   | 1.05    | 1.20 | 1.50 | 2.64    | 29  | 56  | 77  |
| March     | 186  | 0.52    | 0.67 | 0.87 | 0.96   | 0.97    | 1.03 | 1.28 | 2.86    | 48  | 72  | 83  |
| April     | 172  | 0.34    | 0.69 | 0.93 | 1.05   | 1.10    | 1.19 | 1.61 | 2.68    | 41  | 64  | 75  |
| May       | 166  | 0.81    | 0.93 | 1.08 | 1.22   | 1.39    | 1.54 | 2.33 | 4.92    | 25  | 46  | 60  |
| June      | 158  | 0.83    | 1.00 | 1.14 | 1.36   | 1.43    | 1.58 | 2.32 | 3.06    | 18  | 35  | 45  |
| July      | 181  | 0.67    | 0.87 | 1.04 | 1.22   | 1.36    | 1.59 | 2.34 | 3.74    | 27  | 43  | 54  |
| August    | 175  | 0.59    | 0.84 | 1.07 | 1.17   | 1.29    | 1.41 | 2.01 | 3.16    | 26  | 51  | 61  |
| September | 165  | 0.50    | 0.92 | 1.09 | 1.24   | 1.41    | 1.52 | 2.56 | 4.98    | 23  | 42  | 52  |
| October   | 182  | 0.50    | 0.72 | 0.98 | 1.15   | 1.29    | 1.47 | 2.33 | 4.48    | 28  | 43  | 57  |
| November  | 5    | 0.96    | 0.96 | 1.04 | 1.10   | 1.47    | 1.88 | 2.39 | 2.39    | 60  | 60  | 60  |
| December  | 0    | 0.00    | 0.00 | 0.00 | 0.00   | 0.00    | 0.00 | 0.00 | 0.00    | 0   | 0   | 0   |
| Year      | 1486 | 0.34    | 0.77 | 1.00 | 1.14   | 1.26    | 1.41 | 2.14 | 4.98    | 30  | 50  | 62  |

Erythemal Dose [kJ/m<sup>2</sup>] versus Time

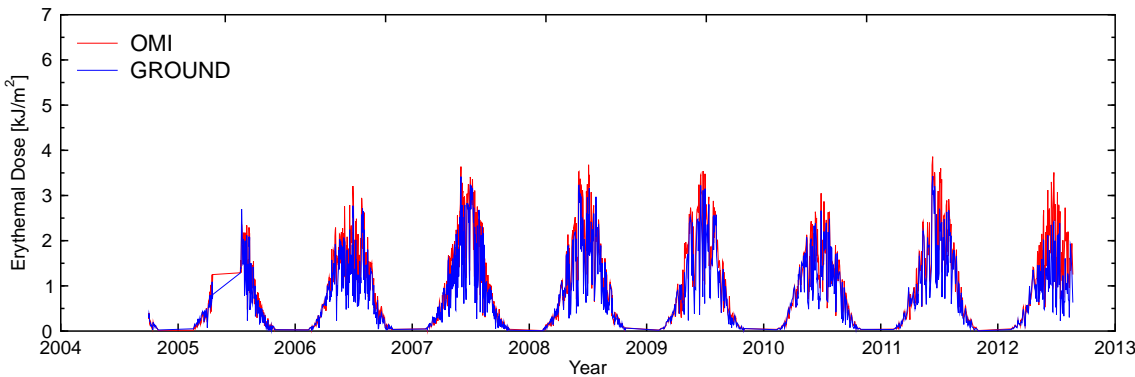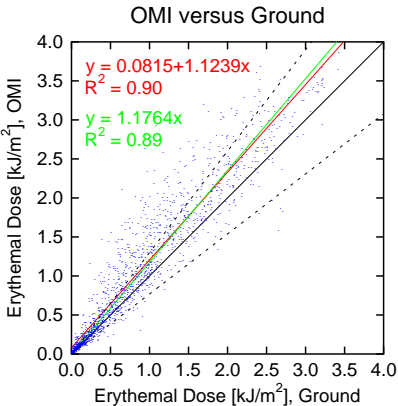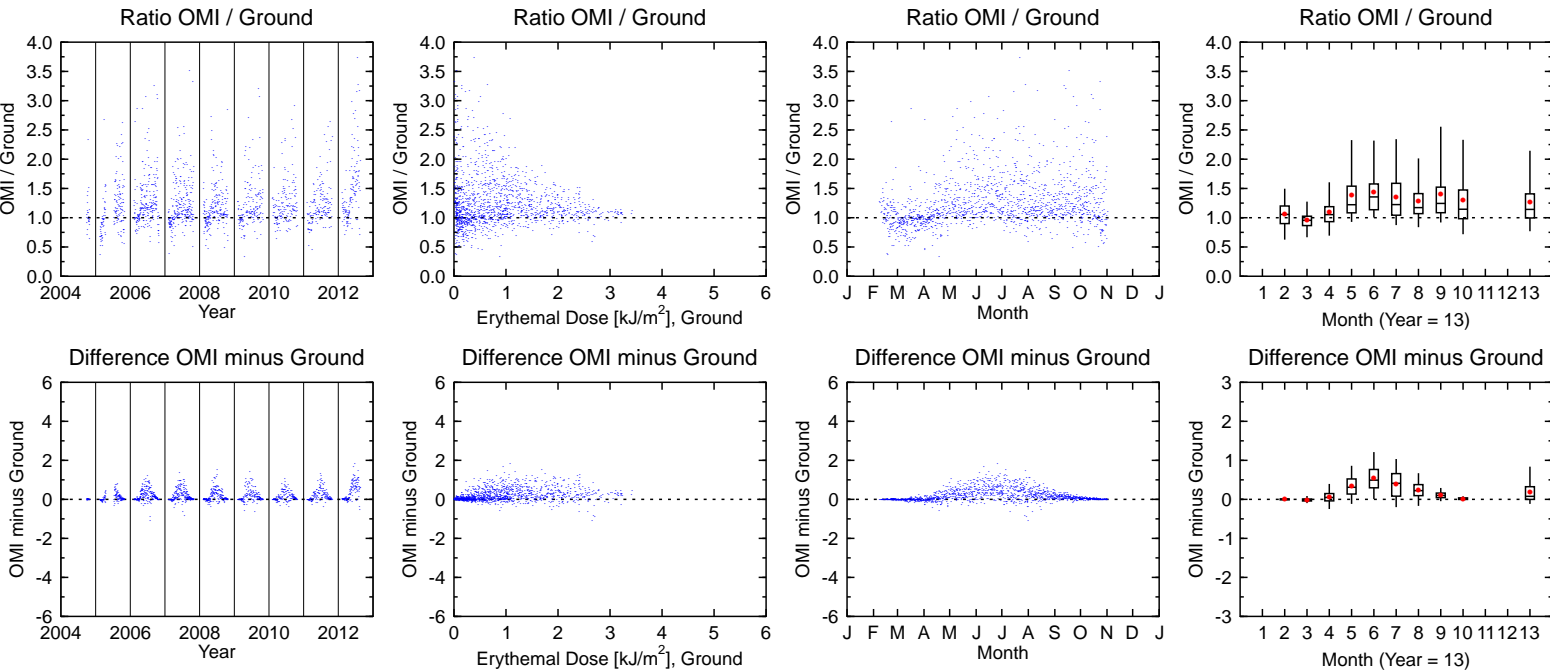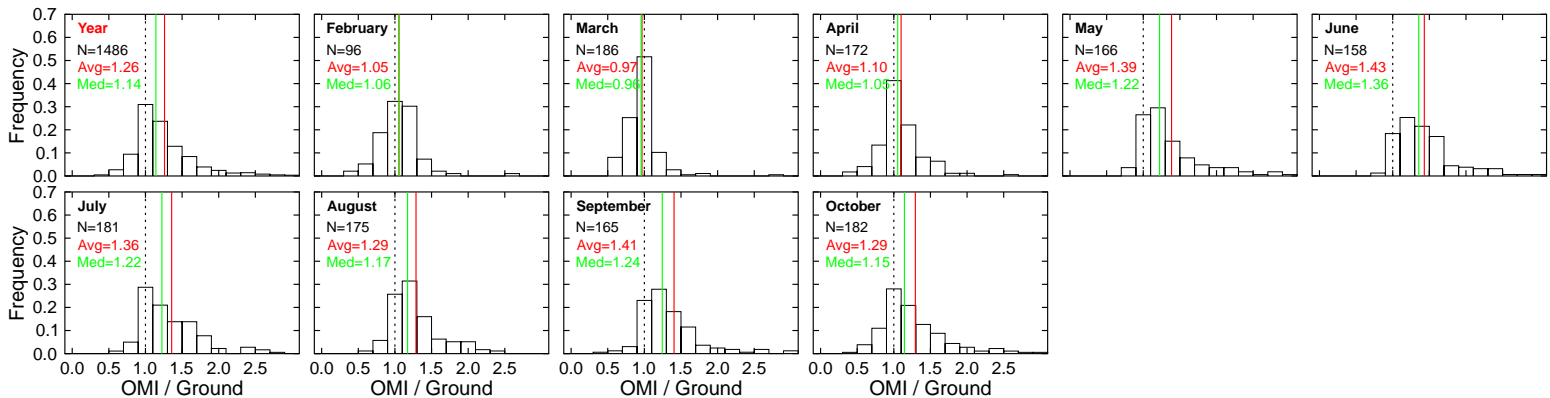

Supplement: Supplementary file 17 [file acp-15-7391-2015-supplement.zip]
