# Supplementary material for: Comparison of OMI UV observations with ground-based measurements at high northern latitudes
Source: Copernicus journal article supplement (doi:10.5194/acp-15-7391-2015), 2015-07-09

# Sodankyla, Finland (67.37°N, 26.63°E)

## OPEDRate, SZA less than 84, Dist less than 12 km

| Month     | N    | Minimum | 5%   | 25%  | Median | Average | 75%  | 95%  | Maximum | W10 | W20 | W30 |
|-----------|------|---------|------|------|--------|---------|------|------|---------|-----|-----|-----|
| January   | 0    | 0.00    | 0.00 | 0.00 | 0.00   | 0.00    | 0.00 | 0.00 | 0.00    | 0   | 0   | 0   |
| February  | 73   | 0.82    | 0.97 | 1.12 | 1.18   | 1.21    | 1.27 | 1.54 | 2.01    | 14  | 58  | 81  |
| March     | 187  | 0.74    | 0.93 | 1.07 | 1.13   | 1.14    | 1.18 | 1.45 | 2.45    | 32  | 79  | 89  |
| April     | 242  | 0.69    | 0.88 | 1.03 | 1.10   | 1.15    | 1.20 | 1.64 | 2.33    | 41  | 72  | 83  |
| May       | 204  | 0.64    | 0.76 | 0.97 | 1.11   | 1.17    | 1.32 | 1.73 | 3.10    | 33  | 53  | 67  |
| June      | 186  | 0.67    | 0.81 | 0.99 | 1.09   | 1.17    | 1.27 | 1.86 | 2.61    | 37  | 62  | 75  |
| July      | 219  | 0.63    | 0.78 | 0.95 | 1.06   | 1.19    | 1.24 | 1.87 | 9.88    | 38  | 62  | 76  |
| August    | 214  | 0.70    | 0.84 | 0.97 | 1.05   | 1.16    | 1.18 | 1.82 | 8.08    | 51  | 73  | 84  |
| September | 193  | 0.51    | 0.74 | 0.97 | 1.05   | 1.10    | 1.17 | 1.70 | 3.23    | 48  | 69  | 78  |
| October   | 198  | 0.50    | 0.63 | 0.87 | 1.05   | 1.07    | 1.17 | 1.55 | 4.02    | 28  | 58  | 69  |
| November  | 24   | 0.72    | 0.75 | 0.90 | 0.96   | 1.04    | 1.08 | 1.38 | 2.10    | 46  | 58  | 79  |
| December  | 0    | 0.00    | 0.00 | 0.00 | 0.00   | 0.00    | 0.00 | 0.00 | 0.00    | 0   | 0   | 0   |
| Year      | 1740 | 0.50    | 0.78 | 0.98 | 1.09   | 1.15    | 1.21 | 1.70 | 9.88    | 38  | 66  | 78  |

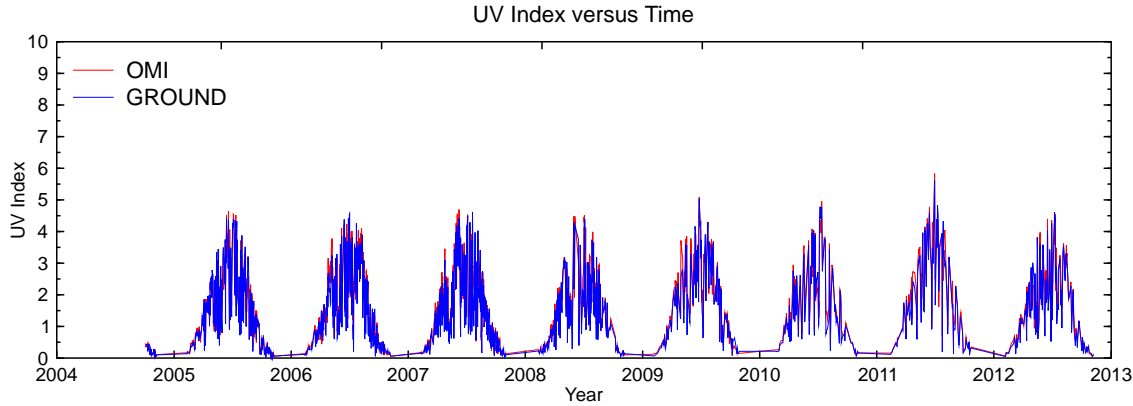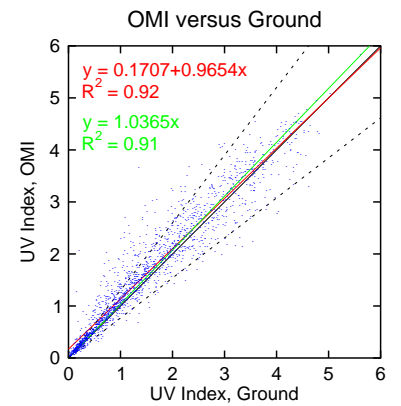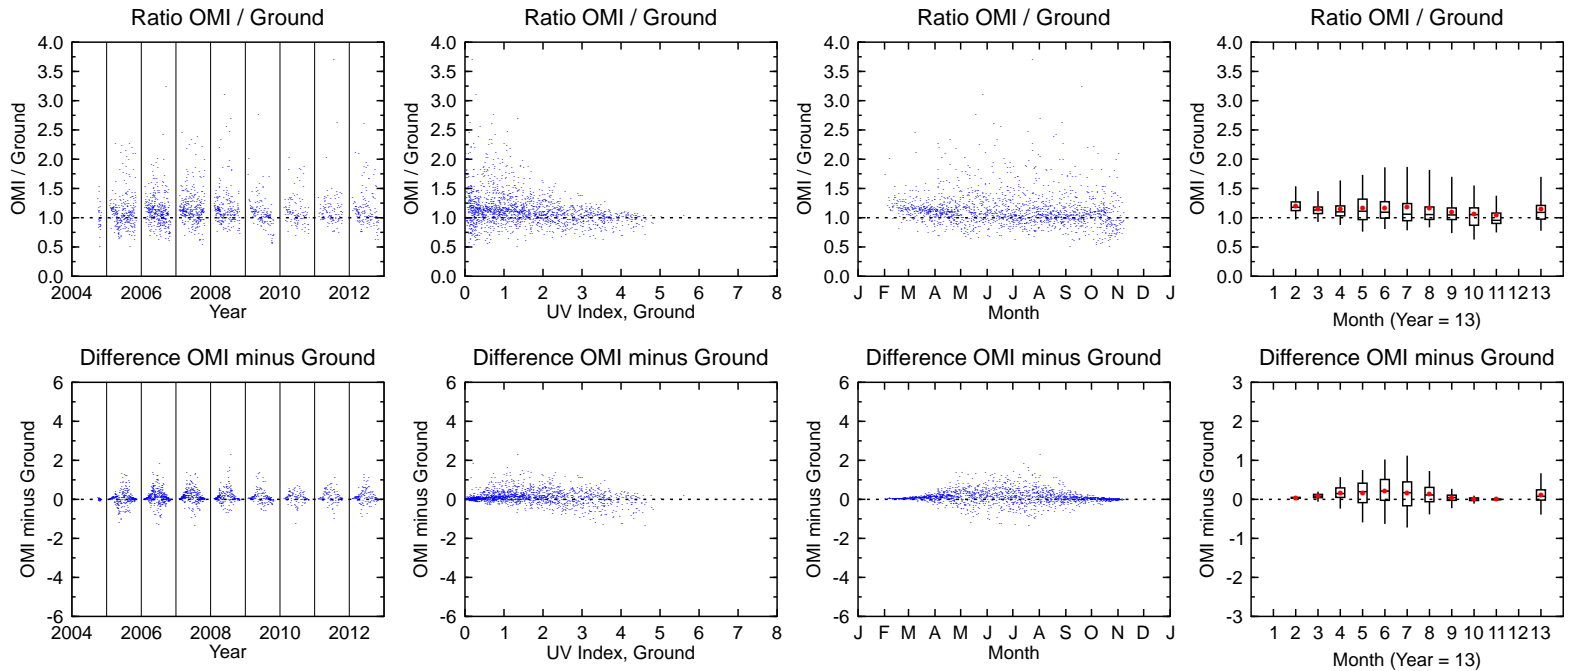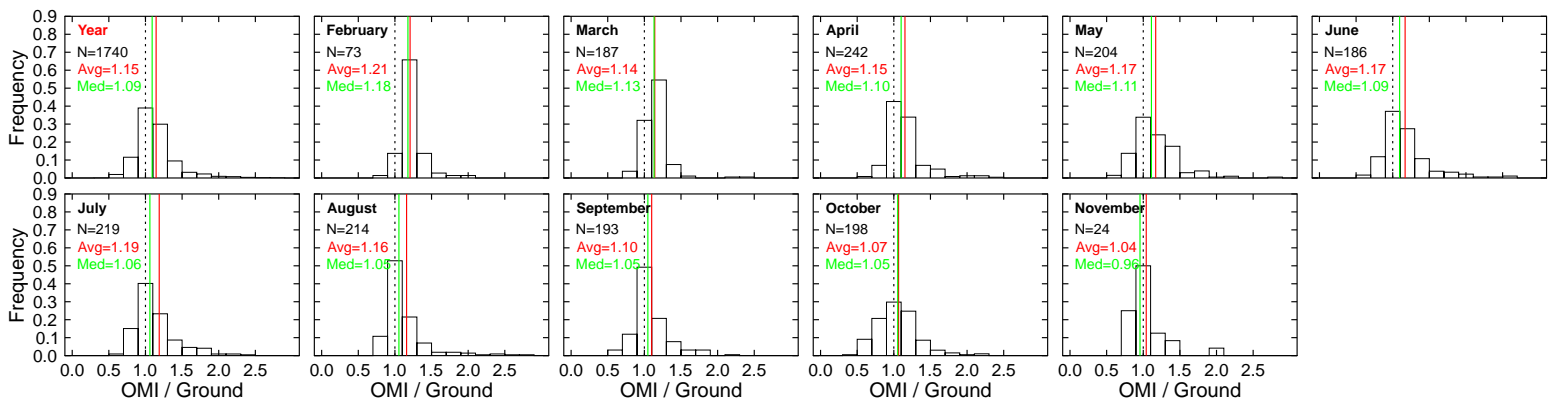

Supplement: Supplementary file 19 [file acp-15-7391-2015-supplement.zip]
