# Supplementary material for: Comparison of OMI UV observations with ground-based measurements at high northern latitudes
Source: Copernicus journal article supplement (doi:10.5194/acp-15-7391-2015), 2015-07-09

Oesteraas, Norway (59.95°N, 10.6°E)  
EDDose, all data

| Month     | N    | Minimum | 5%   | 25%  | Median | Average | 75%  | 95%  | Maximum | W10 | W20 | W30 |
|-----------|------|---------|------|------|--------|---------|------|------|---------|-----|-----|-----|
| January   | 222  | 0.60    | 0.73 | 0.90 | 1.03   | 1.17    | 1.21 | 2.17 | 4.59    | 36  | 59  | 71  |
| February  | 217  | 0.63    | 0.70 | 0.83 | 0.95   | 1.03    | 1.12 | 1.67 | 3.69    | 31  | 55  | 74  |
| March     | 236  | 0.46    | 0.74 | 0.87 | 1.00   | 1.07    | 1.16 | 1.67 | 3.30    | 32  | 63  | 77  |
| April     | 228  | 0.68    | 0.90 | 1.03 | 1.09   | 1.20    | 1.25 | 1.87 | 3.02    | 48  | 69  | 79  |
| May       | 223  | 0.59    | 0.85 | 0.99 | 1.07   | 1.13    | 1.17 | 1.73 | 3.44    | 48  | 74  | 85  |
| June      | 228  | 0.68    | 0.87 | 1.03 | 1.11   | 1.17    | 1.21 | 1.72 | 2.92    | 38  | 71  | 82  |
| July      | 240  | 0.52    | 0.87 | 1.01 | 1.09   | 1.14    | 1.21 | 1.61 | 2.81    | 48  | 72  | 82  |
| August    | 228  | 0.72    | 0.87 | 1.02 | 1.11   | 1.19    | 1.24 | 1.88 | 3.32    | 40  | 68  | 77  |
| September | 197  | 0.72    | 0.91 | 1.05 | 1.11   | 1.21    | 1.27 | 1.75 | 2.84    | 40  | 65  | 76  |
| October   | 238  | 0.61    | 0.85 | 1.06 | 1.14   | 1.37    | 1.37 | 2.64 | 5.73    | 31  | 58  | 69  |
| November  | 217  | 0.43    | 0.84 | 1.02 | 1.12   | 1.42    | 1.59 | 2.88 | 5.40    | 37  | 56  | 65  |
| December  | 202  | 0.26    | 0.72 | 0.94 | 1.09   | 1.24    | 1.30 | 2.48 | 4.93    | 35  | 51  | 65  |
| Year      | 2676 | 0.26    | 0.79 | 0.98 | 1.09   | 1.20    | 1.23 | 2.06 | 5.73    | 39  | 64  | 75  |

Erythemal Dose [kJ/m<sup>2</sup>] versus Time

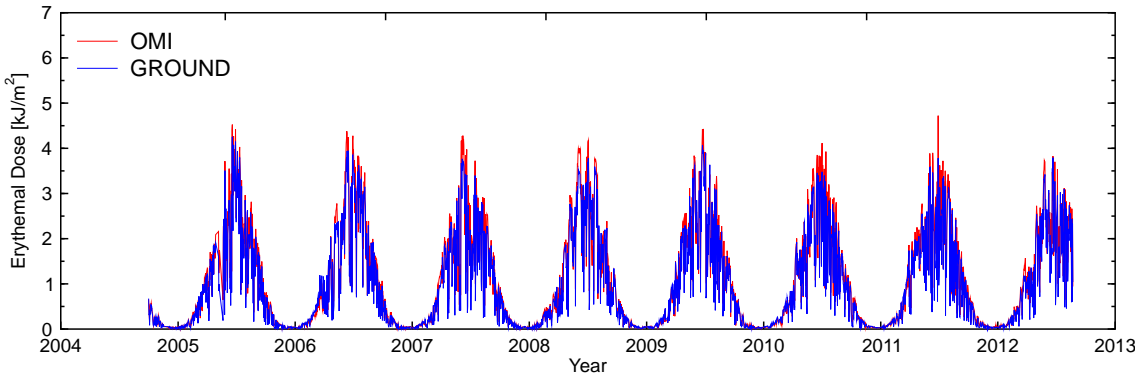

OMI versus Ground

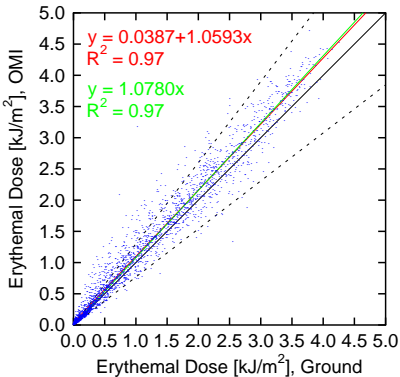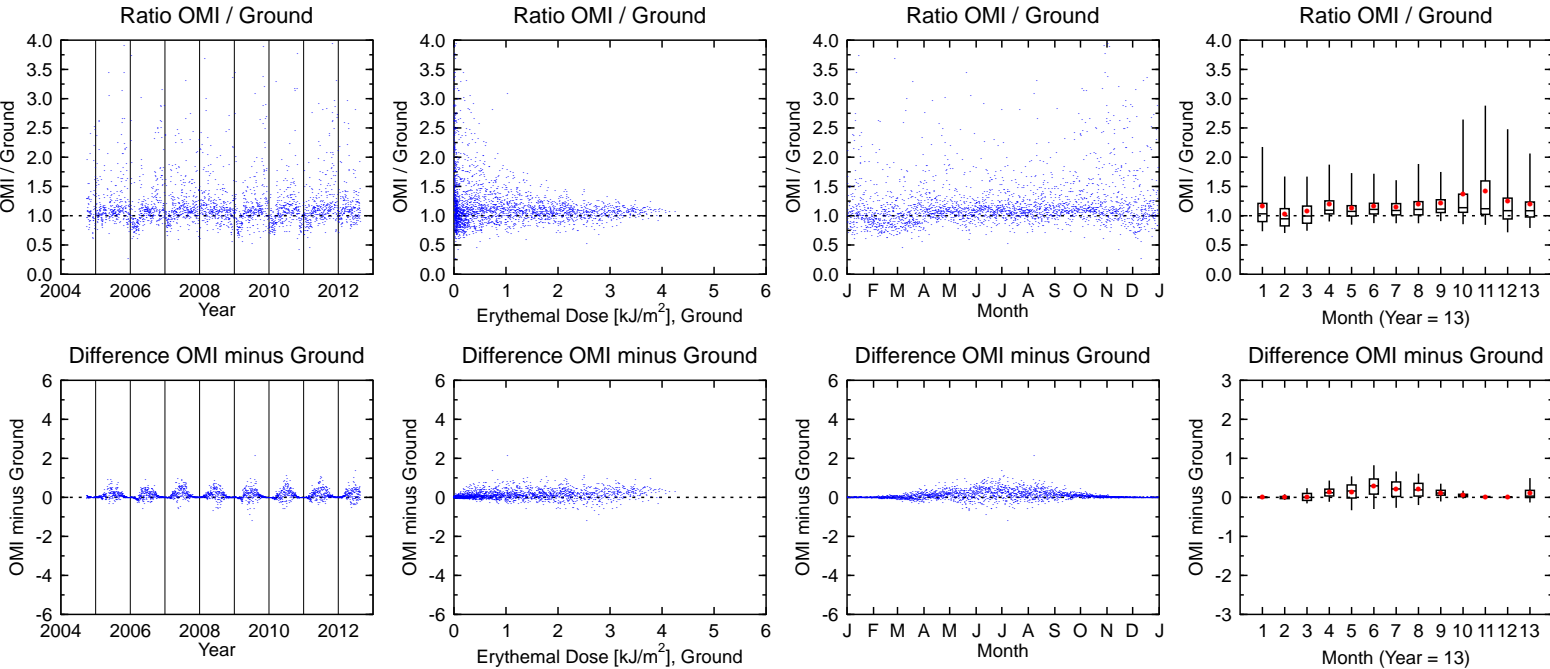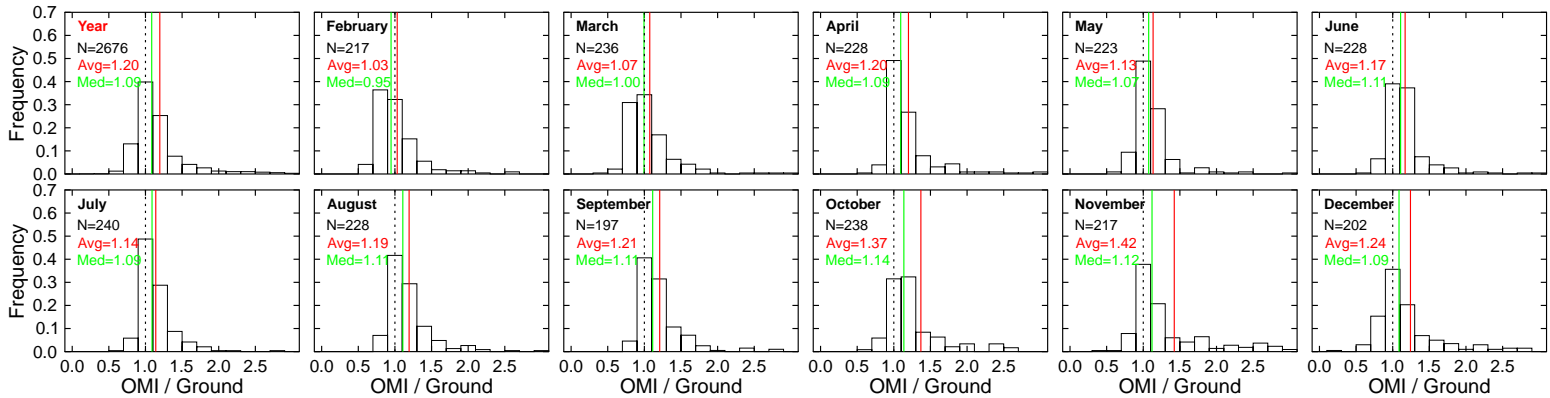

Supplement: Supplementary file 20 [file acp-15-7391-2015-supplement.zip]
