# Supplementary material for: Comparison of OMI UV observations with ground-based measurements at high northern latitudes
Source: Copernicus journal article supplement (doi:10.5194/acp-15-7391-2015), 2015-07-09

Barrow, Alaska (71.32°N, 156.68°E)  
CSEDDose, SZA less than 84, Dist less than 12 km

| Month     | N    | Minimum | 5%   | 25%  | Median | Average | 75%  | 95%  | Maximum | W10 | W20 | W30 |
|-----------|------|---------|------|------|--------|---------|------|------|---------|-----|-----|-----|
| January   | 0    | 0.00    | 0.00 | 0.00 | 0.00   | 0.00    | 0.00 | 0.00 | 0.00    | 0   | 0   | 0   |
| February  | 39   | 0.81    | 0.85 | 0.91 | 0.93   | 0.97    | 1.01 | 1.24 | 1.46    | 64  | 92  | 97  |
| March     | 100  | 0.72    | 0.94 | 0.98 | 1.01   | 1.03    | 1.06 | 1.17 | 1.42    | 81  | 96  | 98  |
| April     | 100  | 0.88    | 1.01 | 1.07 | 1.12   | 1.15    | 1.20 | 1.43 | 1.63    | 35  | 75  | 88  |
| May       | 121  | 1.05    | 1.10 | 1.18 | 1.28   | 1.32    | 1.39 | 1.68 | 2.02    | 7   | 31  | 55  |
| June      | 158  | 1.00    | 1.09 | 1.24 | 1.38   | 1.45    | 1.62 | 2.06 | 2.78    | 6   | 19  | 41  |
| July      | 180  | 1.05    | 1.13 | 1.26 | 1.44   | 1.66    | 1.84 | 2.91 | 4.54    | 1   | 17  | 34  |
| August    | 175  | 1.18    | 1.21 | 1.48 | 1.74   | 1.96    | 2.14 | 3.26 | 8.69    | 0   | 3   | 10  |
| September | 175  | 1.17    | 1.33 | 1.64 | 1.92   | 2.06    | 2.31 | 3.25 | 4.31    | 0   | 1   | 5   |
| October   | 155  | 1.19    | 1.27 | 1.45 | 1.66   | 1.80    | 2.05 | 2.70 | 3.71    | 0   | 2   | 6   |
| November  | 0    | 0.00    | 0.00 | 0.00 | 0.00   | 0.00    | 0.00 | 0.00 | 0.00    | 0   | 0   | 0   |
| December  | 0    | 0.00    | 0.00 | 0.00 | 0.00   | 0.00    | 0.00 | 0.00 | 0.00    | 0   | 0   | 0   |
| Year      | 1203 | 0.72    | 0.99 | 1.19 | 1.44   | 1.60    | 1.83 | 2.75 | 8.69    | 13  | 26  | 38  |

Erythemal Dose [kJ/m<sup>2</sup>] versus Time

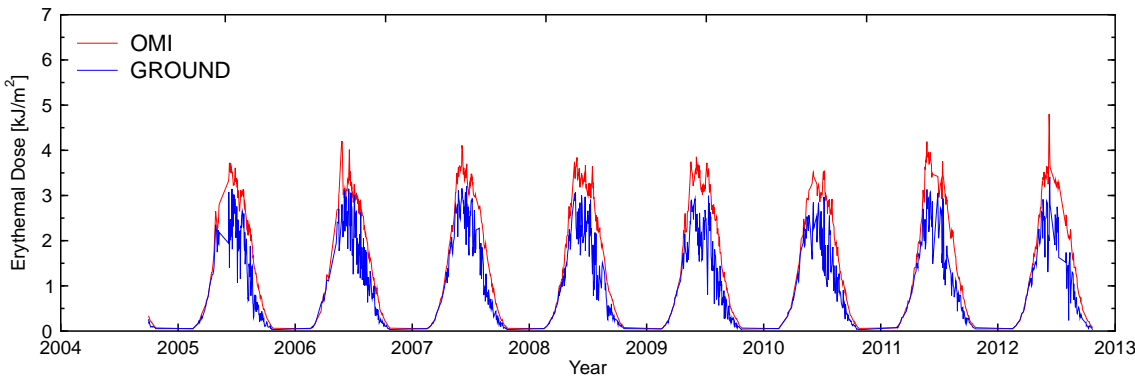

OMI versus Ground

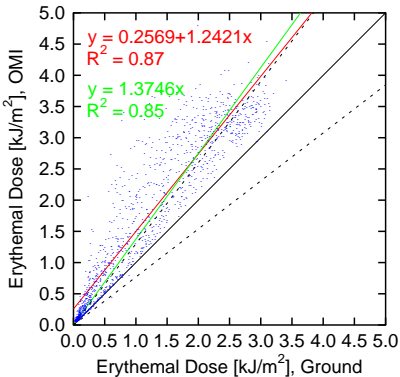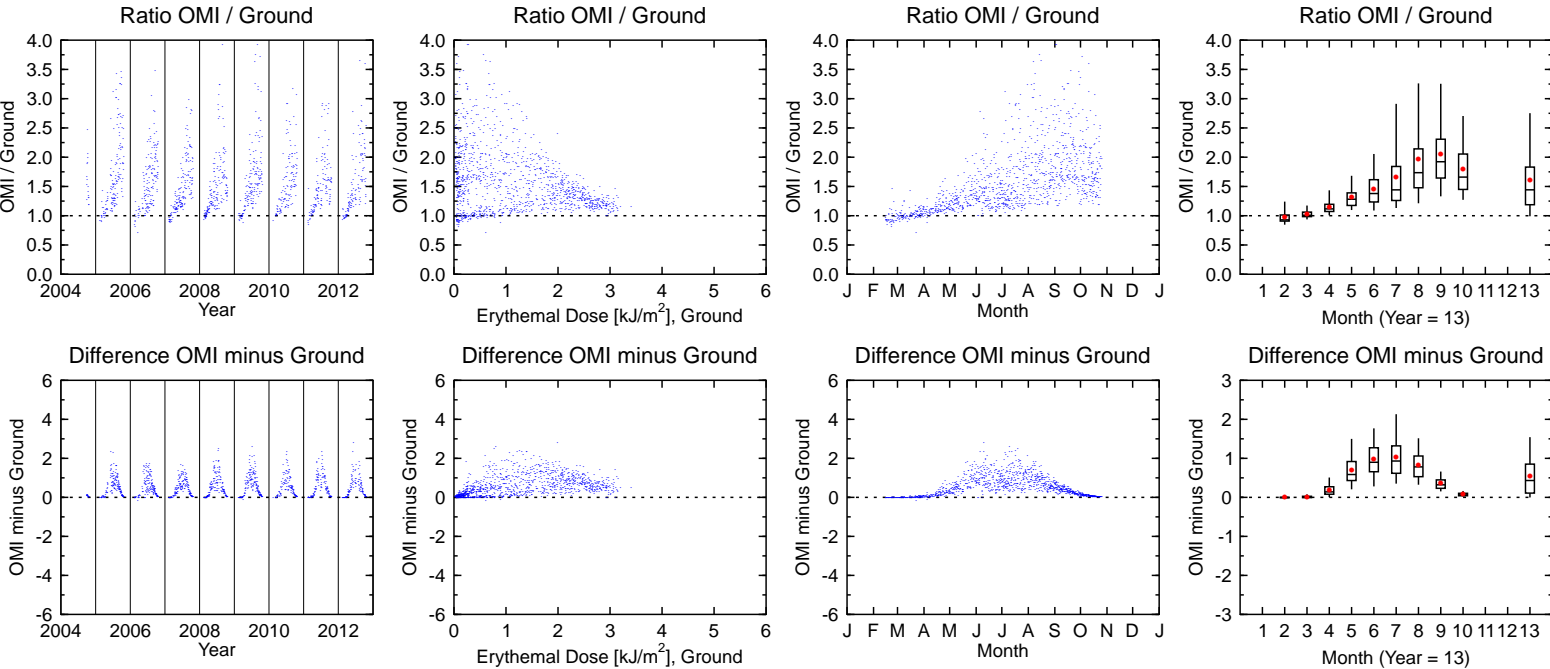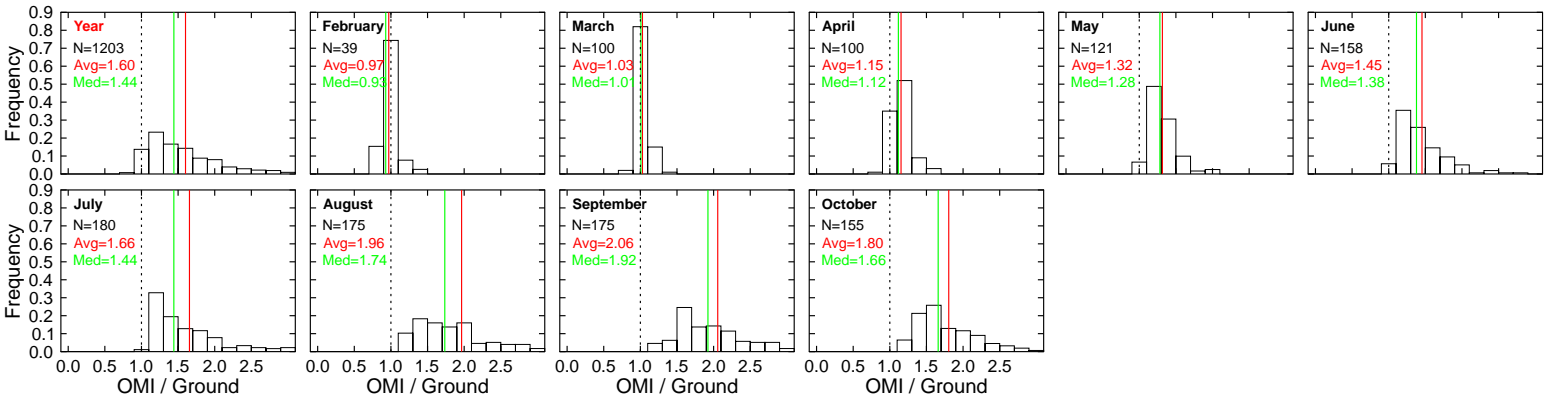

Supplement: Supplementary file 21 [file acp-15-7391-2015-supplement.zip]
