# Supplementary material for: Comparison of OMI UV observations with ground-based measurements at high northern latitudes
Source: Copernicus journal article supplement (doi:10.5194/acp-15-7391-2015), 2015-07-09

Eureka, Canada (79.99°N, 85.93°E)  
EDRate (Ground at local solar noon), SZA less than 84, Dist less than 12 km

| Month     | N    | Minimum | 5%   | 25%  | Median | Average | 75%  | 95%  | Maximum | W10 | W20 | W30 |
|-----------|------|---------|------|------|--------|---------|------|------|---------|-----|-----|-----|
| January   | 0    | 0.00    | 0.00 | 0.00 | 0.00   | 0.00    | 0.00 | 0.00 | 0.00    | 0   | 0   | 0   |
| February  | 0    | 0.00    | 0.00 | 0.00 | 0.00   | 0.00    | 0.00 | 0.00 | 0.00    | 0   | 0   | 0   |
| March     | 71   | 1.00    | 1.00 | 1.05 | 1.10   | 1.11    | 1.15 | 1.20 | 2.15    | 54  | 94  | 99  |
| April     | 95   | 0.70    | 0.98 | 1.04 | 1.09   | 1.09    | 1.12 | 1.22 | 1.42    | 61  | 89  | 97  |
| May       | 219  | 0.52    | 0.75 | 1.07 | 1.11   | 1.12    | 1.16 | 1.42 | 2.21    | 39  | 75  | 86  |
| June      | 346  | 0.65    | 0.84 | 1.08 | 1.16   | 1.22    | 1.26 | 1.84 | 3.05    | 19  | 54  | 77  |
| July      | 439  | 0.47    | 0.80 | 1.02 | 1.12   | 1.16    | 1.21 | 1.64 | 4.15    | 36  | 69  | 79  |
| August    | 436  | 0.55    | 0.80 | 1.07 | 1.17   | 1.21    | 1.24 | 1.75 | 4.74    | 20  | 55  | 78  |
| September | 217  | 0.15    | 0.65 | 1.13 | 1.29   | 1.34    | 1.50 | 2.19 | 3.51    | 10  | 16  | 45  |
| October   | 0    | 0.00    | 0.00 | 0.00 | 0.00   | 0.00    | 0.00 | 0.00 | 0.00    | 0   | 0   | 0   |
| November  | 0    | 0.00    | 0.00 | 0.00 | 0.00   | 0.00    | 0.00 | 0.00 | 0.00    | 0   | 0   | 0   |
| December  | 0    | 0.00    | 0.00 | 0.00 | 0.00   | 0.00    | 0.00 | 0.00 | 0.00    | 0   | 0   | 0   |
| Year      | 1823 | 0.15    | 0.80 | 1.06 | 1.14   | 1.19    | 1.25 | 1.79 | 4.74    | 28  | 59  | 77  |

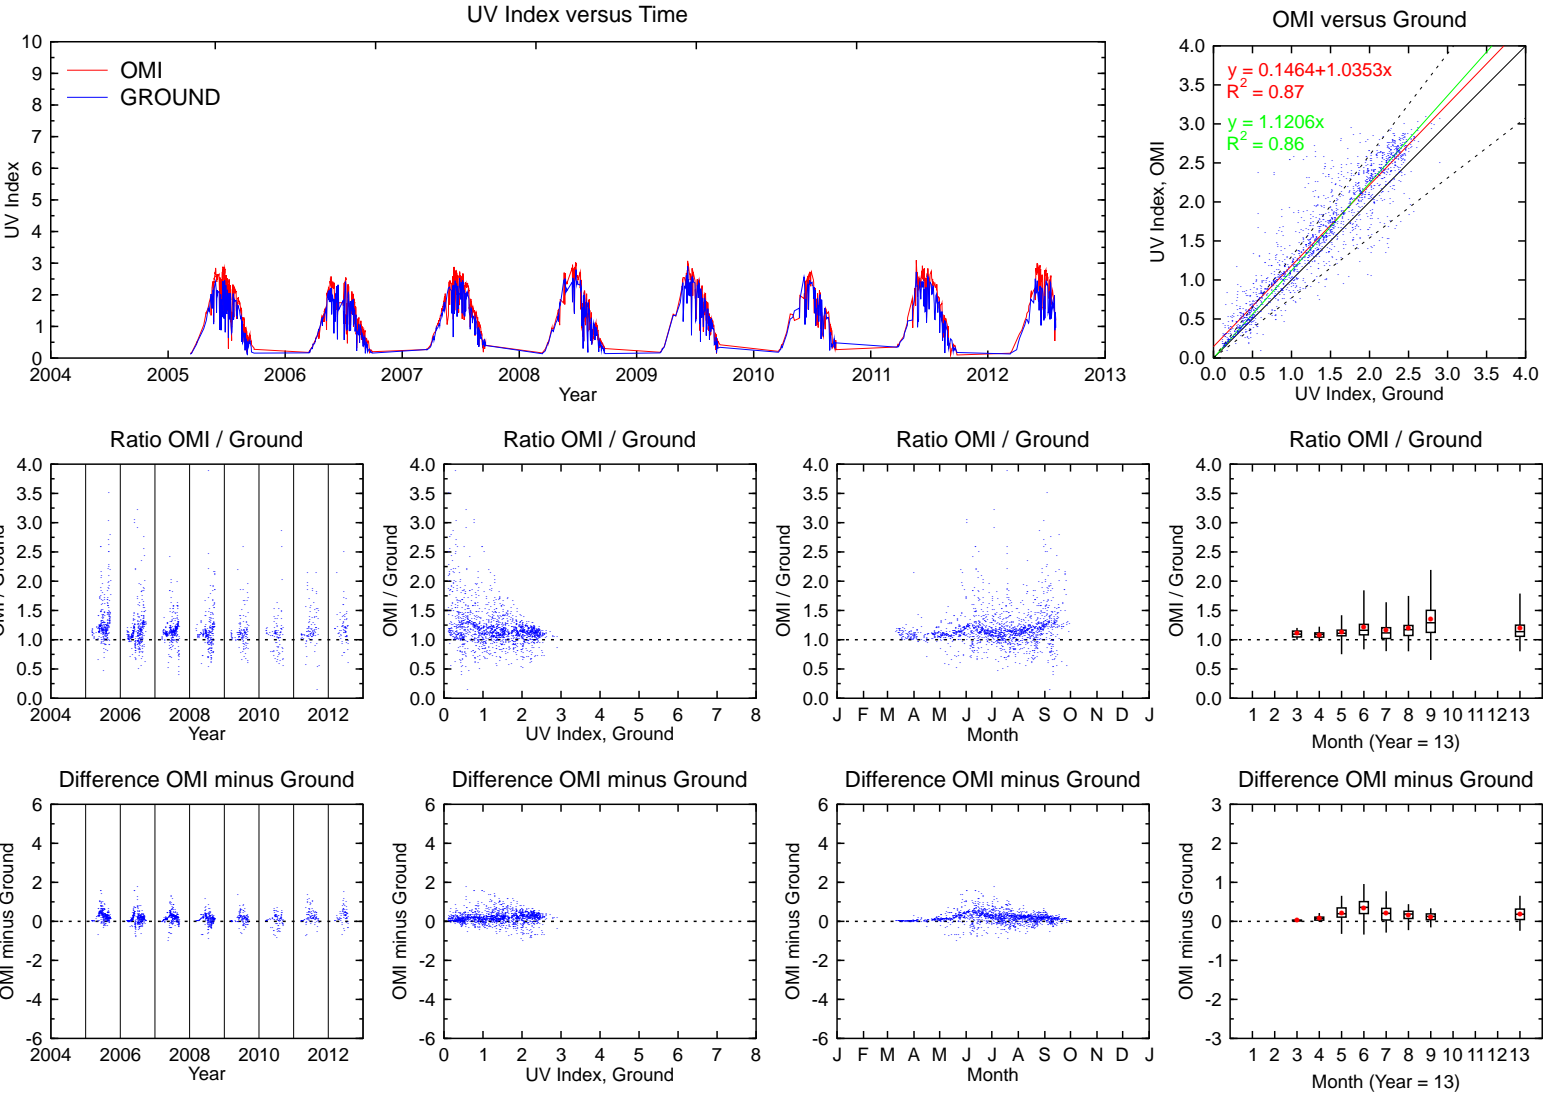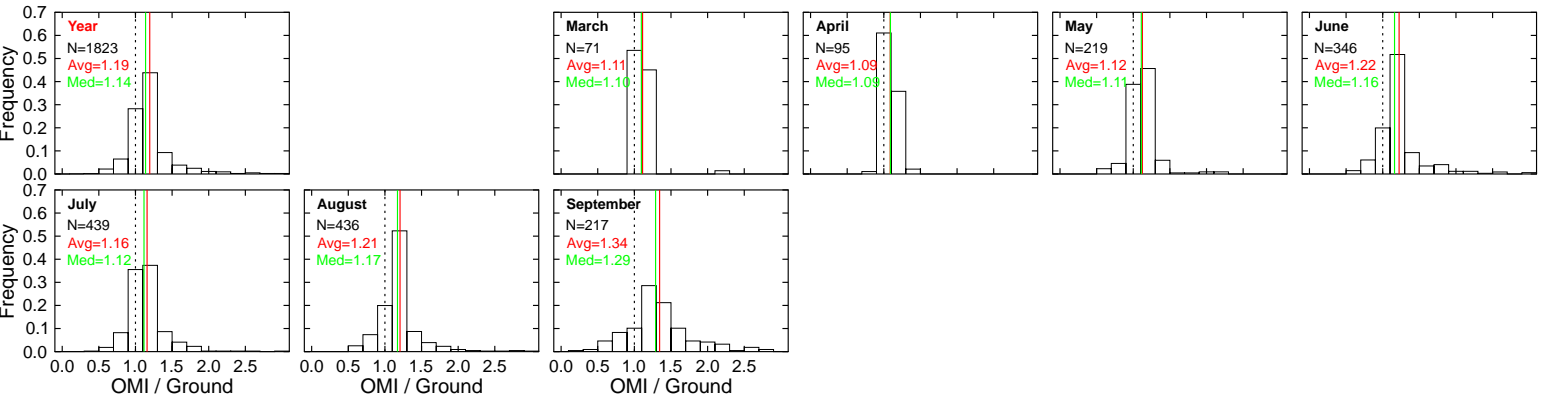

Supplement: Supplementary file 22 [file acp-15-7391-2015-supplement.zip]
