# Supplementary material for: Comparison of OMI UV observations with ground-based measurements at high northern latitudes
Source: Copernicus journal article supplement (doi:10.5194/acp-15-7391-2015), 2015-07-09

Sodankyla, Finland (67.37°N, 26.63°E)  
EDDose, SZA less than 84, Dist less than 12 km

| Month     | N    | Minimum | 5%   | 25%  | Median | Average | 75%  | 95%  | Maximum | W10 | W20 | W30 |
|-----------|------|---------|------|------|--------|---------|------|------|---------|-----|-----|-----|
| January   | 0    | 0.00    | 0.00 | 0.00 | 0.00   | 0.00    | 0.00 | 0.00 | 0.00    | 0   | 0   | 0   |
| February  | 60   | 0.84    | 0.97 | 1.04 | 1.13   | 1.14    | 1.20 | 1.36 | 1.57    | 40  | 75  | 90  |
| March     | 116  | 0.58    | 0.90 | 1.06 | 1.11   | 1.10    | 1.15 | 1.27 | 1.91    | 41  | 87  | 97  |
| April     | 122  | 0.73    | 0.86 | 1.02 | 1.09   | 1.11    | 1.18 | 1.37 | 2.50    | 44  | 76  | 89  |
| May       | 129  | 0.50    | 0.73 | 0.92 | 1.05   | 1.06    | 1.15 | 1.52 | 2.15    | 33  | 68  | 80  |
| June      | 125  | 0.55    | 0.83 | 0.95 | 1.05   | 1.05    | 1.14 | 1.32 | 1.56    | 53  | 81  | 90  |
| July      | 144  | 0.63    | 0.75 | 0.96 | 1.06   | 1.06    | 1.14 | 1.42 | 1.70    | 49  | 72  | 85  |
| August    | 136  | 0.73    | 0.84 | 0.98 | 1.06   | 1.07    | 1.14 | 1.29 | 1.69    | 53  | 82  | 93  |
| September | 122  | 0.56    | 0.80 | 0.99 | 1.10   | 1.08    | 1.16 | 1.31 | 1.54    | 41  | 78  | 89  |
| October   | 147  | 0.53    | 0.65 | 0.87 | 1.06   | 1.05    | 1.20 | 1.49 | 1.87    | 24  | 53  | 73  |
| November  | 26   | 0.63    | 0.70 | 0.80 | 0.93   | 1.03    | 1.26 | 1.49 | 2.05    | 15  | 31  | 69  |
| December  | 0    | 0.00    | 0.00 | 0.00 | 0.00   | 0.00    | 0.00 | 0.00 | 0.00    | 0   | 0   | 0   |
| Year      | 1127 | 0.50    | 0.76 | 0.97 | 1.08   | 1.07    | 1.16 | 1.39 | 2.50    | 42  | 73  | 86  |

Erythemal Dose [kJ/m<sup>2</sup>] versus Time

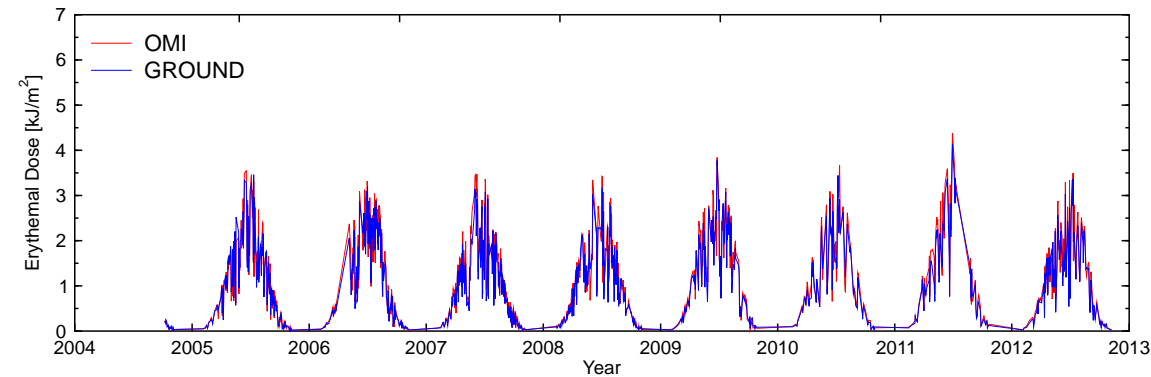

OMI versus Ground

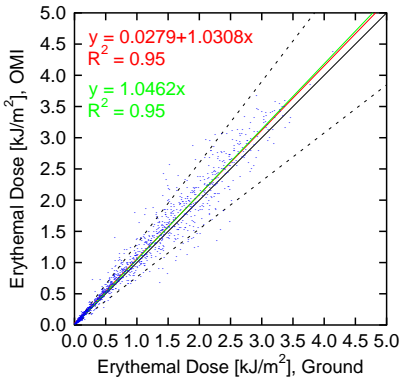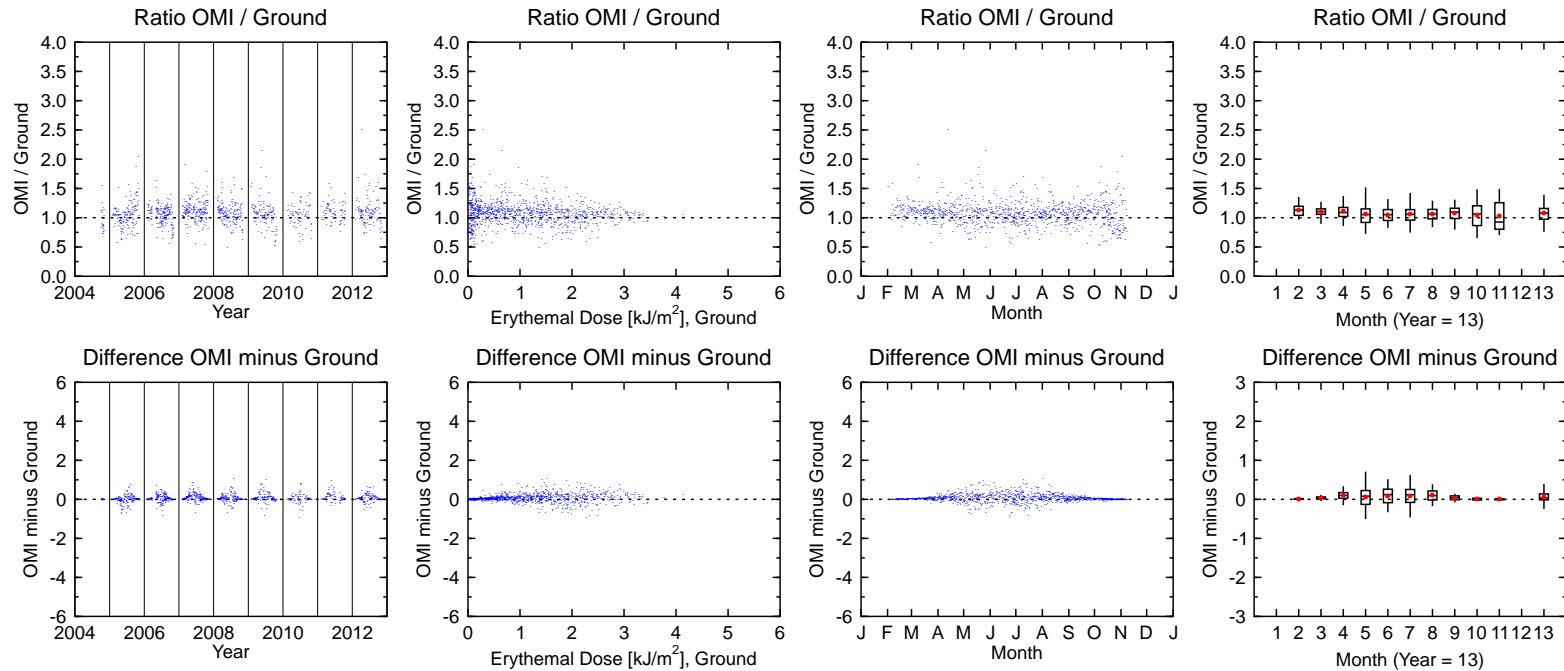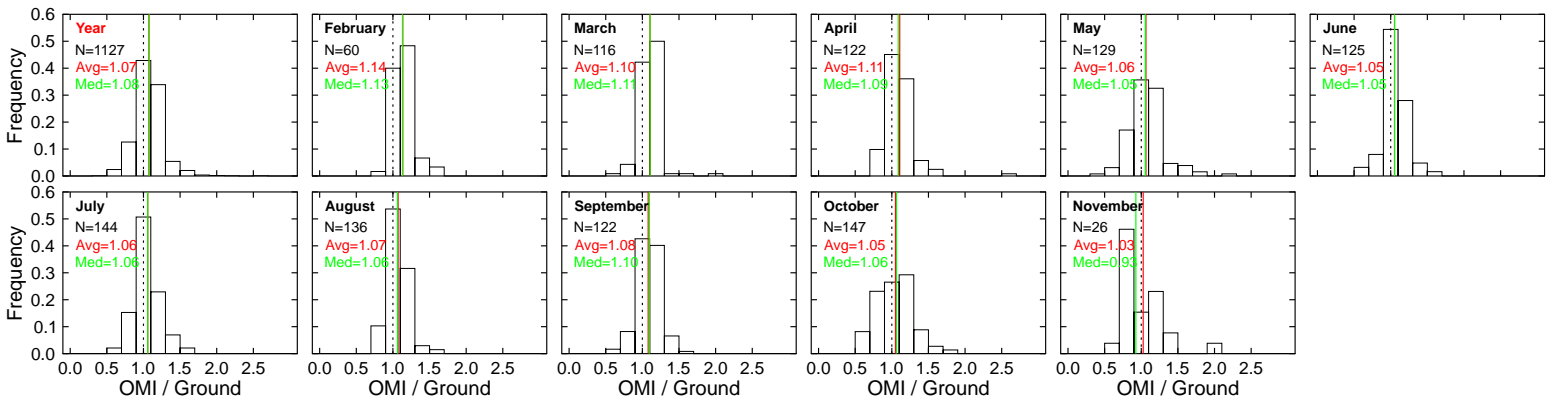

Supplement: Supplementary file 24 [file acp-15-7391-2015-supplement.zip]
