# Supplementary material for: Comparison of OMI UV observations with ground-based measurements at high northern latitudes
Source: Copernicus journal article supplement (doi:10.5194/acp-15-7391-2015), 2015-07-09
Supplement: Supplementary file 25 [file acp-15-7391-2015-supplement.zip]

# Validation statistics<sup>a</sup> for overpass erythral dose rate (DP (1)).

| Site                  | Month | Surface <sup>b</sup> | $N_1$ | $p_{5.1}$ | $p_{25.1}$ | $\tilde{p}_1$ | $\bar{p}_1$ | $p_{75.1}$ | $p_{95.1}$<br>[%] | $W_{10.1}$<br>[%] | $W_{20.1}$<br>[%] | $W_{30.1}$ |
|-----------------------|-------|----------------------|-------|-----------|------------|---------------|-------------|------------|-------------------|-------------------|-------------------|------------|
| Alert (82.50° N)      | Apr   | SC                   | 127   | 0.99      | 1.02       | 1.06          | 1.08        | 1.12       | 1.27              | 70                | 91                | 95         |
|                       | Jul   | SF                   | 274   | 0.61      | 0.93       | 1.08          | 1.15        | 1.30       | 1.81              | 30                | 47                | 62         |
| Eureka (79.99° N)     | Apr   | SC                   | 68    | 1.07      | 1.11       | 1.14          | 1.15        | 1.17       | 1.27              | 18                | 84                | 97         |
|                       | Jul   | SF                   | 293   | 0.89      | 1.01       | 1.10          | 1.10        | 1.16       | 1.34              | 41                | 83                | 91         |
| Ny-Ålesund (78.92° N) | Apr   | SC                   | 494   | 0.28      | 0.49       | 0.60          | 0.61        | 0.73       | 0.90              | 4                 | 11                | 19         |
|                       | Aug   | SF                   | 467   | 0.75      | 0.92       | 1.05          | 1.10        | 1.23       | 1.65              | 36                | 60                | 75         |
| Resolute (74.72° N)   | Apr   | SC                   | 100   | 0.97      | 1.09       | 1.13          | 1.12        | 1.16       | 1.24              | 28                | 87                | 99         |
|                       | Aug   | SF                   | 196   | 0.77      | 1.09       | 1.18          | 1.25        | 1.31       | 2.02              | 17                | 49                | 70         |
| Summit (72.58° N)     | Mar   | PSC                  | 320   | 0.98      | 1.02       | 1.05          | 1.05        | 1.08       | 1.15              | 84                | 98                | 100        |
|                       | Jul   | PSC                  | 263   | 1.01      | 1.06       | 1.08          | 1.09        | 1.13       | 1.21              | 60                | 94                | 99         |
| Barrow (71.32° N)     | Mar   | SC                   | 166   | 1.00      | 1.05       | 1.09          | 1.10        | 1.12       | 1.27              | 59                | 90                | 96         |
|                       | Jul   | SF                   | 277   | 0.82      | 0.97       | 1.08          | 1.11        | 1.17       | 1.53              | 40                | 71                | 84         |
| Andøya (69.28° N)     | Mar   | SC                   | 320   | 0.66      | 0.87       | 0.99          | 1.02        | 1.08       | 1.50              | 44                | 63                | 76         |
|                       | Aug   | SF                   | 283   | 0.76      | 1.00       | 1.14          | 1.34        | 1.49       | 2.50              | 31                | 45                | 57         |
| Sodankylä (67.37° N)  | Mar   | SC                   | 187   | 0.93      | 1.07       | 1.13          | 1.14        | 1.18       | 1.45              | 32                | 79                | 89         |
|                       | Aug   | SF                   | 214   | 0.84      | 0.97       | 1.05          | 1.16        | 1.18       | 1.82              | 51                | 73                | 84         |
| Trondheim (63.42° N)  | Mar   | SC                   | 208   | 1.23      | 1.38       | 1.59          | 1.91        | 1.94       | 3.84              | 0                 | 3                 | 11         |
|                       | Aug   | SF                   | 229   | 0.85      | 1.03       | 1.11          | 1.24        | 1.31       | 2.03              | 34                | 62                | 72         |
| Finse (60.60° N)      | Mar   | SC                   | 115   | 0.16      | 0.27       | 0.47          | 0.48        | 0.62       | 0.91              | 4                 | 8                 | 12         |
|                       | Aug   | SF                   | 204   | 0.66      | 0.85       | 1.01          | 1.27        | 1.37       | 2.49              | 28                | 40                | 54         |
| Jokioinen (60.82° N)  | Feb   | SC                   | 86    | 0.61      | 0.74       | 0.87          | 0.92        | 1.07       | 1.31              | 22                | 43                | 63         |
|                       | Jul   | SF                   | 165   | 0.79      | 0.93       | 1.03          | 1.11        | 1.16       | 1.74              | 48                | 68                | 79         |
| Østerås (59.95° N)    | Feb   | SC                   | 209   | 0.66      | 0.81       | 0.92          | 1.03        | 1.09       | 1.87              | 28                | 56                | 75         |
|                       | Jul   | SF                   | 211   | 0.78      | 0.98       | 1.08          | 1.33        | 1.38       | 2.57              | 40                | 57                | 66         |
| Blindern (59.94° N)   | Feb   | SC                   | 205   | 0.72      | 0.84       | 0.95          | 1.10        | 1.15       | 1.78              | 30                | 55                | 74         |
|                       | Jul   | SF                   | 211   | 0.76      | 0.99       | 1.08          | 1.39        | 1.35       | 2.28              | 42                | 57                | 66         |

<sup>a</sup> Match-up data were filtered for SZA < 84° and Dis; 12 km.

<sup>b</sup> S = snow cover, SF = snow-free, PSC = permanent snow cover.
