# Supplementary material for: Comparison of OMI UV observations with ground-based measurements at high northern latitudes
Source: Copernicus journal article supplement (doi:10.5194/acp-15-7391-2015), 2015-07-09

Eureka, Canada (79.99°N, 85.93°E)  
CSEDDose, SZA less than 84, Dist less than 12 km

| Month     | N   | Minimum | 5%   | 25%  | Median | Average | 75%  | 95%  | Maximum | W10 | W20 | W30 |
|-----------|-----|---------|------|------|--------|---------|------|------|---------|-----|-----|-----|
| January   | 0   | 0.00    | 0.00 | 0.00 | 0.00   | 0.00    | 0.00 | 0.00 | 0.00    | 0   | 0   | 0   |
| February  | 0   | 0.00    | 0.00 | 0.00 | 0.00   | 0.00    | 0.00 | 0.00 | 0.00    | 0   | 0   | 0   |
| March     | 50  | 0.97    | 1.02 | 1.05 | 1.10   | 1.11    | 1.14 | 1.23 | 1.75    | 50  | 92  | 98  |
| April     | 49  | 1.00    | 1.03 | 1.08 | 1.13   | 1.13    | 1.17 | 1.27 | 1.44    | 41  | 90  | 96  |
| May       | 82  | 0.58    | 1.01 | 1.09 | 1.14   | 1.21    | 1.24 | 1.73 | 2.60    | 27  | 63  | 82  |
| June      | 140 | 0.81    | 1.07 | 1.19 | 1.28   | 1.40    | 1.47 | 2.25 | 3.21    | 6   | 26  | 53  |
| July      | 166 | 1.08    | 1.12 | 1.19 | 1.33   | 1.47    | 1.61 | 2.38 | 3.77    | 1   | 32  | 48  |
| August    | 167 | 1.03    | 1.13 | 1.21 | 1.32   | 1.53    | 1.72 | 2.47 | 4.82    | 2   | 22  | 47  |
| September | 102 | 1.04    | 1.15 | 1.30 | 1.47   | 1.71    | 1.80 | 2.72 | 8.18    | 3   | 8   | 27  |
| October   | 0   | 0.00    | 0.00 | 0.00 | 0.00   | 0.00    | 0.00 | 0.00 | 0.00    | 0   | 0   | 0   |
| November  | 0   | 0.00    | 0.00 | 0.00 | 0.00   | 0.00    | 0.00 | 0.00 | 0.00    | 0   | 0   | 0   |
| December  | 0   | 0.00    | 0.00 | 0.00 | 0.00   | 0.00    | 0.00 | 0.00 | 0.00    | 0   | 0   | 0   |
| Year      | 756 | 0.58    | 1.06 | 1.16 | 1.26   | 1.43    | 1.51 | 2.30 | 8.18    | 11  | 37  | 56  |

Erythemal Dose [kJ/m<sup>2</sup>] versus Time

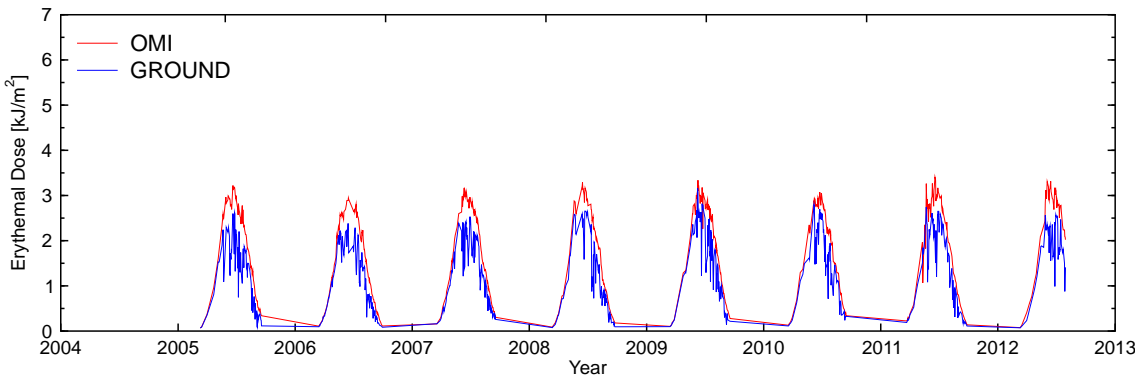

OMI versus Ground

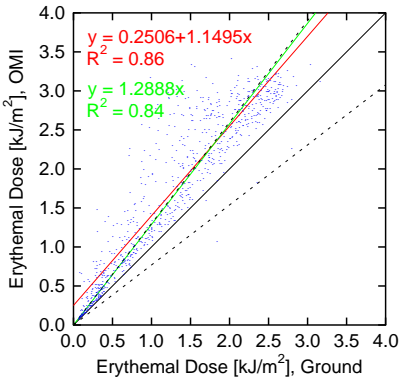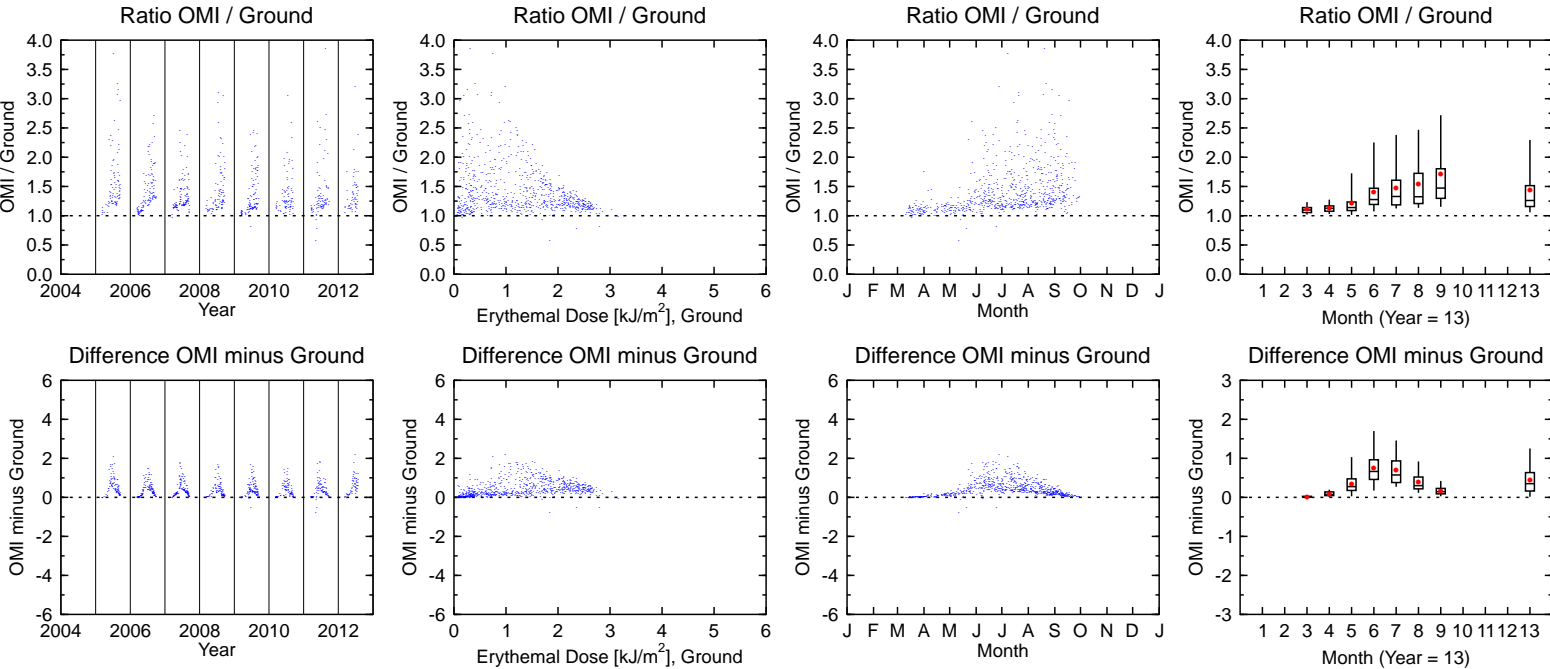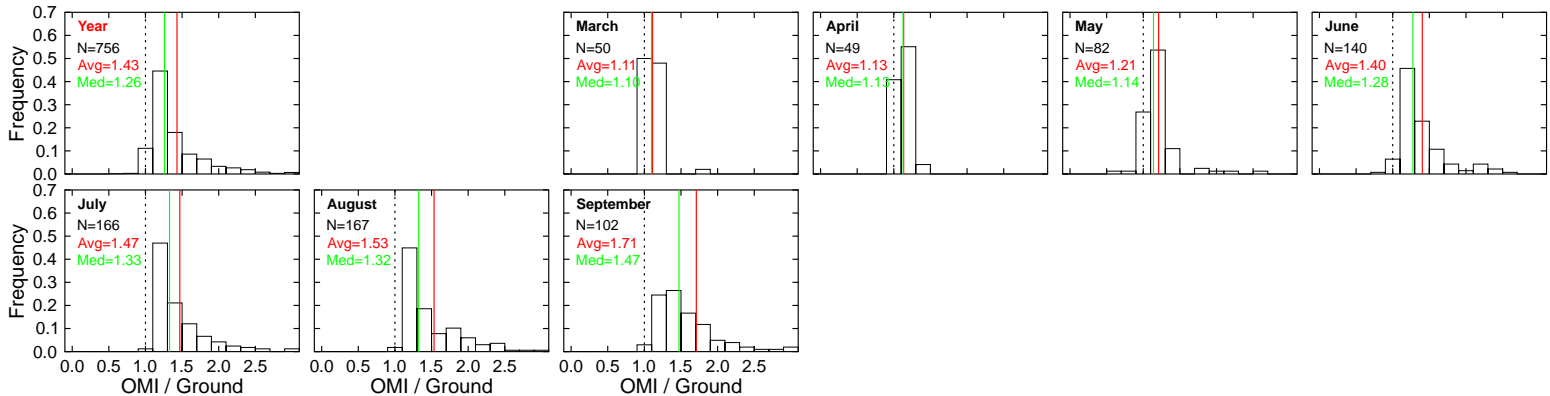

Supplement: Supplementary file 27 [file acp-15-7391-2015-supplement.zip]
