# Supplementary material for: Comparison of OMI UV observations with ground-based measurements at high northern latitudes
Source: Copernicus journal article supplement (doi:10.5194/acp-15-7391-2015), 2015-07-09

Jokioinen, Finland (60.82°N, 23.5°E)  
EDDose, all data

| Month     | N    | Minimum | 5%   | 25%  | Median | Average | 75%  | 95%  | Maximum | W10 | W20 | W30 |
|-----------|------|---------|------|------|--------|---------|------|------|---------|-----|-----|-----|
| January   | 220  | 0.32    | 0.59 | 0.70 | 0.88   | 0.99    | 1.13 | 1.84 | 3.59    | 20  | 34  | 46  |
| February  | 187  | 0.51    | 0.62 | 0.73 | 0.81   | 0.85    | 0.93 | 1.21 | 1.50    | 17  | 37  | 63  |
| March     | 186  | 0.56    | 0.66 | 0.75 | 0.84   | 0.92    | 1.01 | 1.50 | 2.20    | 18  | 38  | 60  |
| April     | 222  | 0.54    | 0.73 | 0.97 | 1.03   | 1.05    | 1.13 | 1.35 | 1.96    | 52  | 73  | 84  |
| May       | 229  | 0.73    | 0.86 | 0.98 | 1.04   | 1.07    | 1.13 | 1.40 | 2.01    | 61  | 82  | 92  |
| June      | 198  | 0.61    | 0.80 | 0.97 | 1.02   | 1.05    | 1.11 | 1.32 | 1.78    | 60  | 79  | 91  |
| July      | 220  | 0.62    | 0.84 | 0.95 | 1.00   | 1.01    | 1.06 | 1.21 | 1.42    | 65  | 90  | 96  |
| August    | 225  | 0.69    | 0.82 | 0.98 | 1.04   | 1.06    | 1.11 | 1.31 | 1.99    | 62  | 83  | 92  |
| September | 187  | 0.72    | 0.89 | 0.99 | 1.08   | 1.11    | 1.19 | 1.47 | 2.03    | 49  | 73  | 88  |
| October   | 237  | 0.68    | 0.86 | 1.02 | 1.10   | 1.17    | 1.28 | 1.70 | 2.44    | 42  | 62  | 76  |
| November  | 174  | 0.43    | 0.54 | 0.81 | 1.07   | 1.15    | 1.35 | 2.09 | 6.67    | 24  | 39  | 49  |
| December  | 198  | 0.21    | 0.53 | 0.75 | 1.04   | 1.18    | 1.36 | 2.35 | 5.85    | 18  | 34  | 45  |
| Year      | 2483 | 0.21    | 0.66 | 0.89 | 1.02   | 1.05    | 1.14 | 1.57 | 6.67    | 42  | 61  | 74  |

Erythemal Dose [kJ/m<sup>2</sup>] versus Time

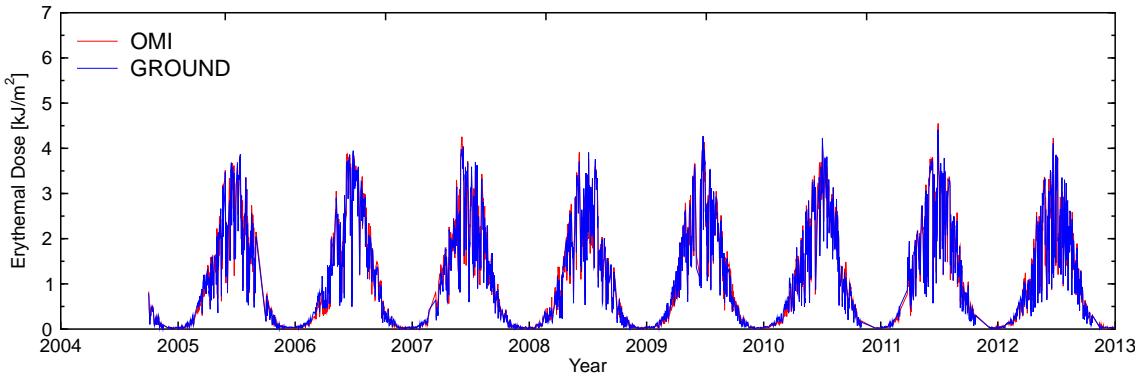

OMI versus Ground

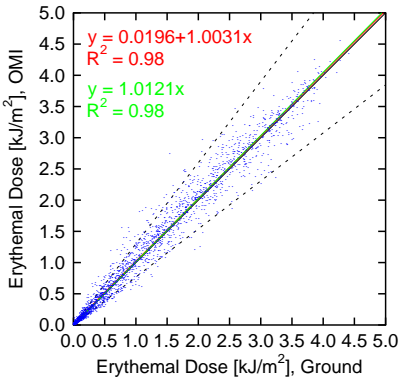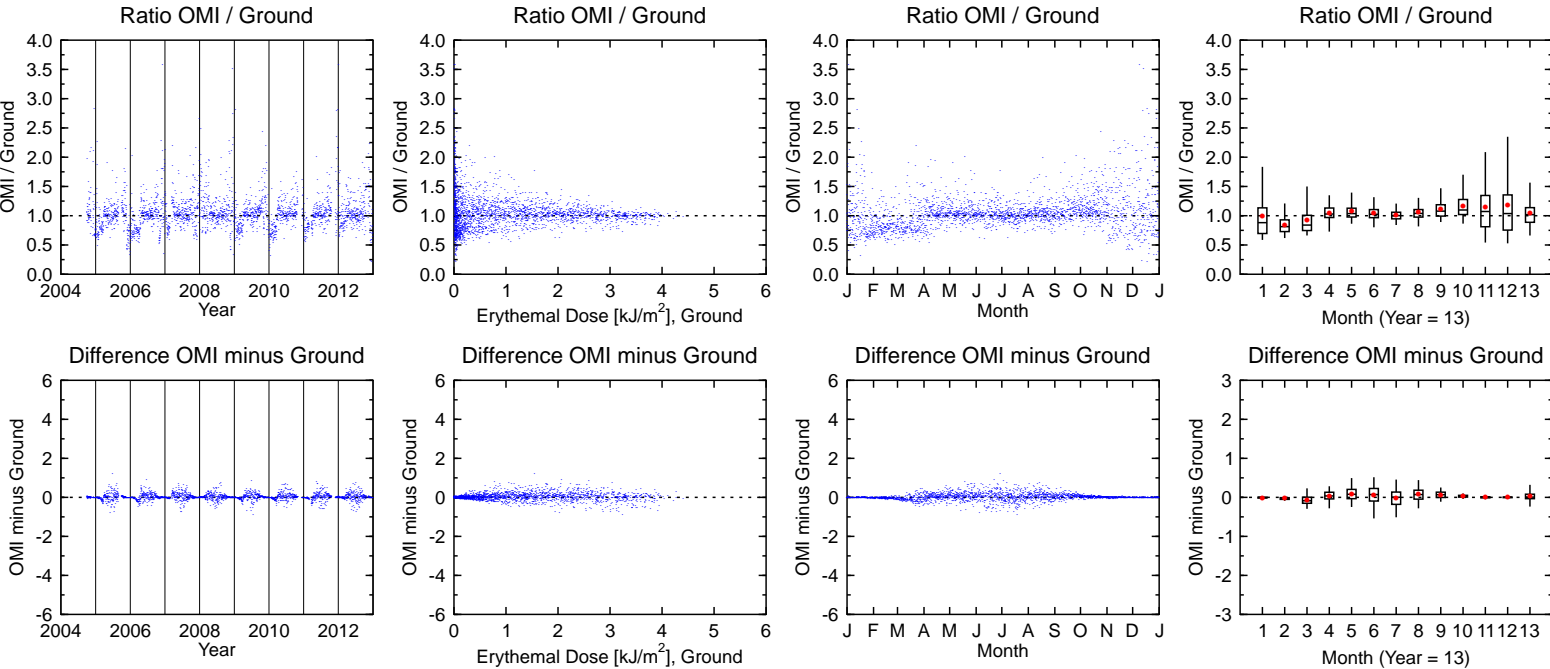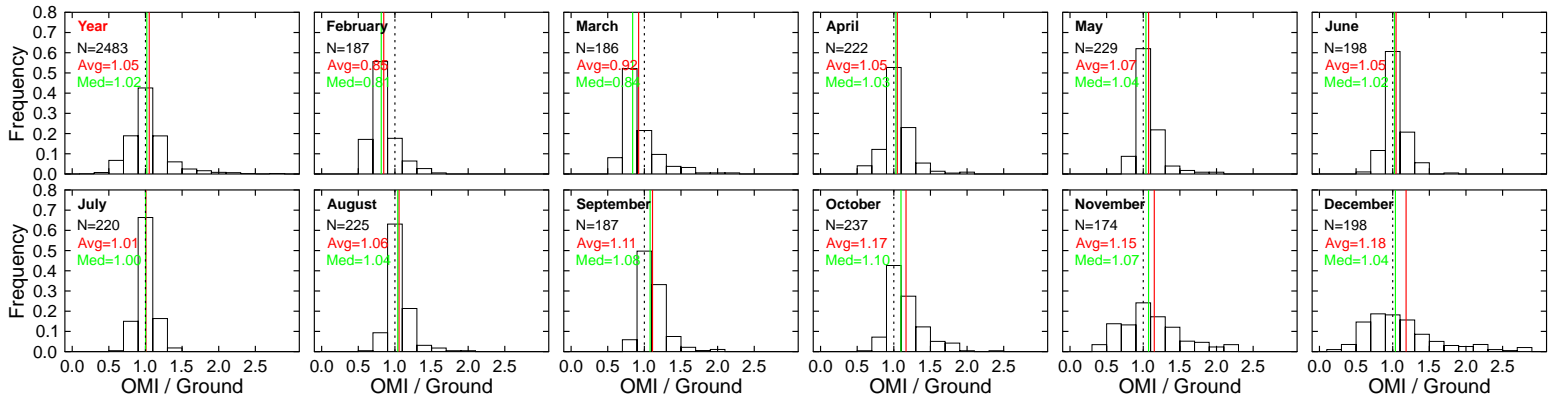

Supplement: Supplementary file 30 [file acp-15-7391-2015-supplement.zip]
