# Supplementary material for: Comparison of OMI UV observations with ground-based measurements at high northern latitudes
Source: Copernicus journal article supplement (doi:10.5194/acp-15-7391-2015), 2015-07-09

Jokioinen, Finland (60.82°N, 23.5°E)

EDRate (Ground at local solar noon), SZA less than 84, Dist less than 12 km

| Month     | N    | Minimum | 5%   | 25%  | Median | Average | 75%  | 95%  | Maximum | W10 | W20 | W30 |
|-----------|------|---------|------|------|--------|---------|------|------|---------|-----|-----|-----|
| January   | 152  | 0.41    | 0.52 | 0.70 | 0.87   | 1.01    | 1.10 | 1.96 | 4.03    | 20  | 34  | 45  |
| February  | 164  | 0.42    | 0.57 | 0.68 | 0.79   | 0.90    | 0.94 | 1.30 | 5.36    | 16  | 30  | 47  |
| March     | 149  | 0.52    | 0.59 | 0.72 | 0.83   | 0.92    | 1.01 | 1.67 | 2.34    | 18  | 37  | 55  |
| April     | 180  | 0.49    | 0.71 | 0.95 | 1.03   | 1.17    | 1.25 | 1.78 | 7.29    | 46  | 61  | 68  |
| May       | 215  | 0.58    | 0.77 | 0.95 | 1.04   | 1.23    | 1.33 | 2.06 | 13.63   | 43  | 59  | 69  |
| June      | 203  | 0.47    | 0.71 | 0.93 | 1.03   | 1.14    | 1.27 | 1.83 | 3.13    | 44  | 62  | 70  |
| July      | 217  | 0.40    | 0.62 | 0.87 | 0.98   | 1.12    | 1.22 | 2.16 | 4.09    | 39  | 52  | 66  |
| August    | 209  | 0.47    | 0.69 | 0.93 | 1.06   | 1.35    | 1.39 | 2.23 | 7.81    | 33  | 52  | 63  |
| September | 173  | 0.43    | 0.74 | 0.93 | 1.06   | 1.18    | 1.31 | 1.99 | 6.90    | 39  | 55  | 68  |
| October   | 208  | 0.52    | 0.79 | 0.96 | 1.08   | 1.19    | 1.34 | 2.00 | 3.86    | 38  | 55  | 68  |
| November  | 142  | 0.29    | 0.50 | 0.77 | 1.03   | 1.14    | 1.33 | 2.14 | 3.99    | 17  | 33  | 49  |
| December  | 49   | 0.23    | 0.53 | 0.64 | 0.88   | 1.07    | 1.22 | 2.09 | 4.68    | 16  | 27  | 39  |
| Year      | 2061 | 0.23    | 0.61 | 0.85 | 1.01   | 1.13    | 1.24 | 1.96 | 13.63   | 33  | 49  | 61  |

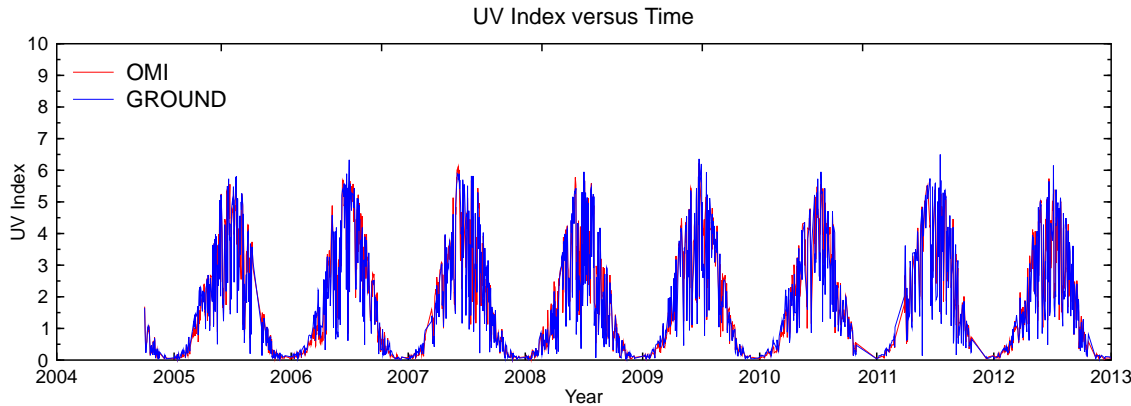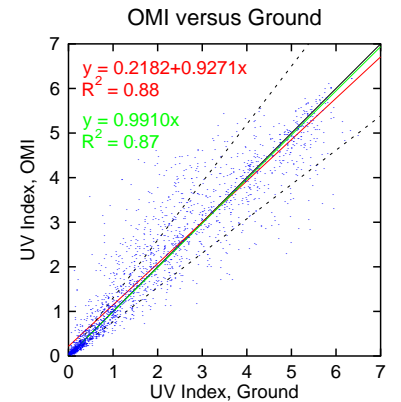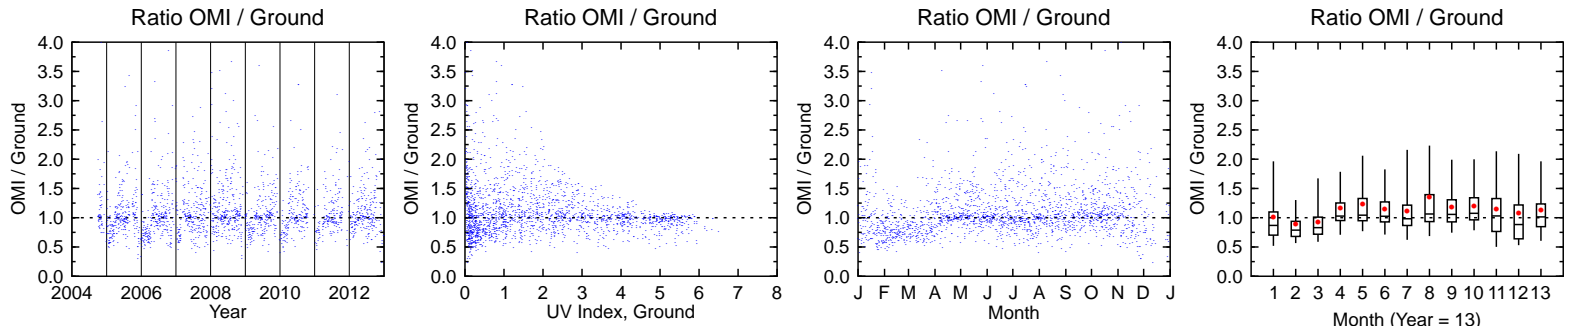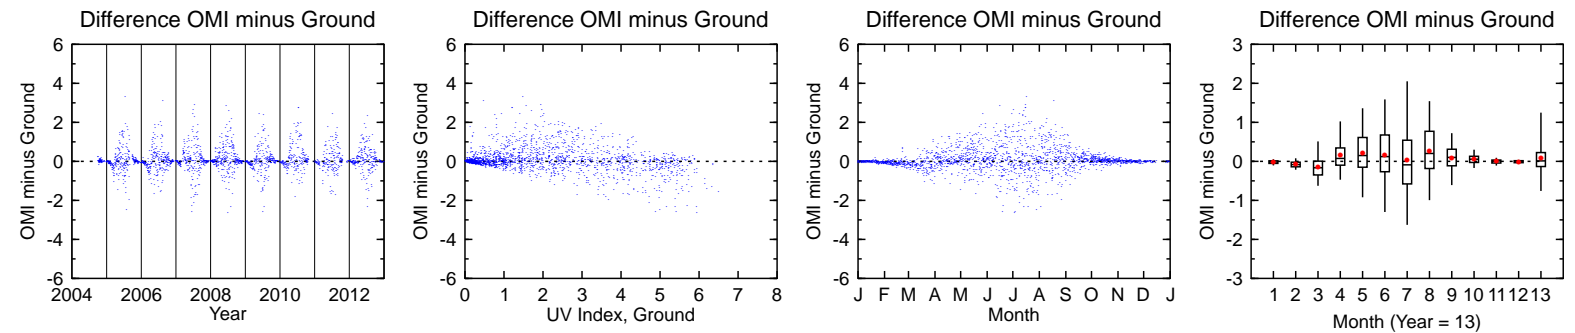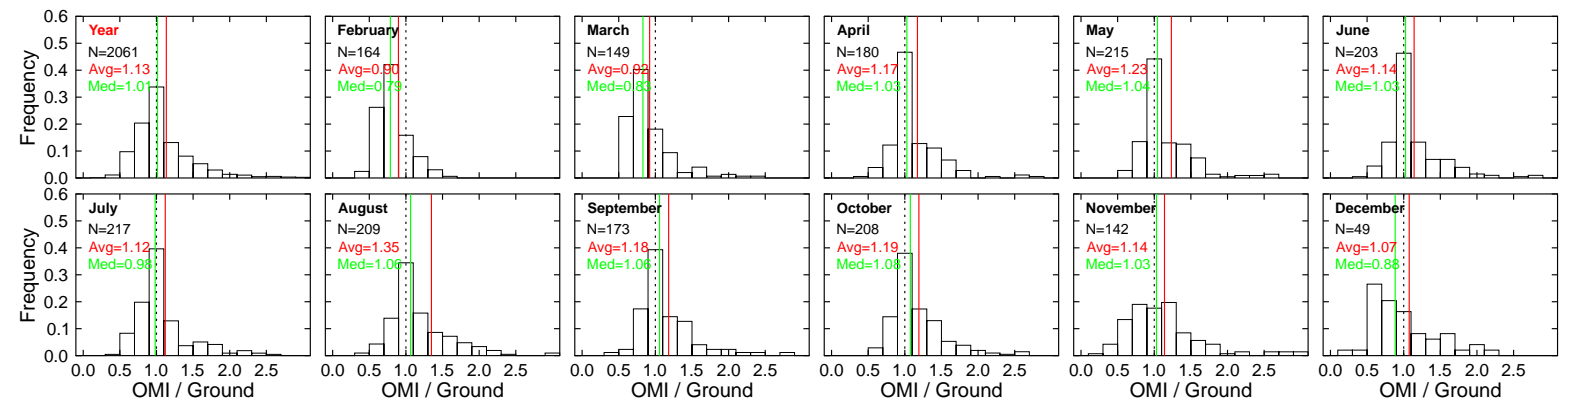

Supplement: Supplementary file 32 [file acp-15-7391-2015-supplement.zip]
