# Supplementary material for: Comparison of OMI UV observations with ground-based measurements at high northern latitudes
Source: Copernicus journal article supplement (doi:10.5194/acp-15-7391-2015), 2015-07-09

Blindern, Norway (59.94°N, 10.72°E)  
CSEDDose, SZA less than 84, Dist less than 12 km

| Month     | N    | Minimum | 5%   | 25%  | Median | Average | 75%  | 95%   | Maximum | W10 | W20 | W30 |
|-----------|------|---------|------|------|--------|---------|------|-------|---------|-----|-----|-----|
| January   | 155  | 0.92    | 0.99 | 1.08 | 1.66   | 2.47    | 2.69 | 7.85  | 10.00   | 26  | 33  | 39  |
| February  | 160  | 0.98    | 1.03 | 1.18 | 1.43   | 2.10    | 1.94 | 5.66  | 16.02   | 16  | 28  | 37  |
| March     | 170  | 1.00    | 1.05 | 1.14 | 1.35   | 1.90    | 2.01 | 4.95  | 9.91    | 16  | 34  | 46  |
| April     | 162  | 1.11    | 1.13 | 1.22 | 1.51   | 2.29    | 2.69 | 6.40  | 14.72   | 0   | 20  | 36  |
| May       | 142  | 1.13    | 1.17 | 1.29 | 1.48   | 2.13    | 2.11 | 5.98  | 10.06   | 0   | 11  | 25  |
| June      | 139  | 1.12    | 1.17 | 1.25 | 1.44   | 2.02    | 2.07 | 5.44  | 8.94    | 0   | 12  | 31  |
| July      | 163  | 1.14    | 1.20 | 1.36 | 1.64   | 2.16    | 2.47 | 4.89  | 8.68    | 0   | 4   | 21  |
| August    | 160  | 1.14    | 1.20 | 1.33 | 1.53   | 2.22    | 2.34 | 5.34  | 10.70   | 0   | 4   | 21  |
| September | 143  | 1.13    | 1.17 | 1.25 | 1.58   | 2.28    | 2.51 | 6.85  | 10.09   | 0   | 11  | 29  |
| October   | 180  | 1.10    | 1.16 | 1.27 | 1.70   | 2.98    | 2.89 | 9.73  | 19.74   | 1   | 10  | 29  |
| November  | 160  | 0.94    | 1.09 | 1.17 | 1.44   | 2.82    | 3.29 | 8.75  | 19.73   | 9   | 29  | 41  |
| December  | 131  | 0.92    | 0.98 | 1.15 | 1.59   | 2.87    | 3.06 | 11.05 | 22.56   | 21  | 32  | 38  |
| Year      | 1865 | 0.92    | 1.07 | 1.24 | 1.52   | 2.36    | 2.47 | 6.82  | 22.56   | 7   | 19  | 33  |

Erythemal Dose [kJ/m<sup>2</sup>] versus Time

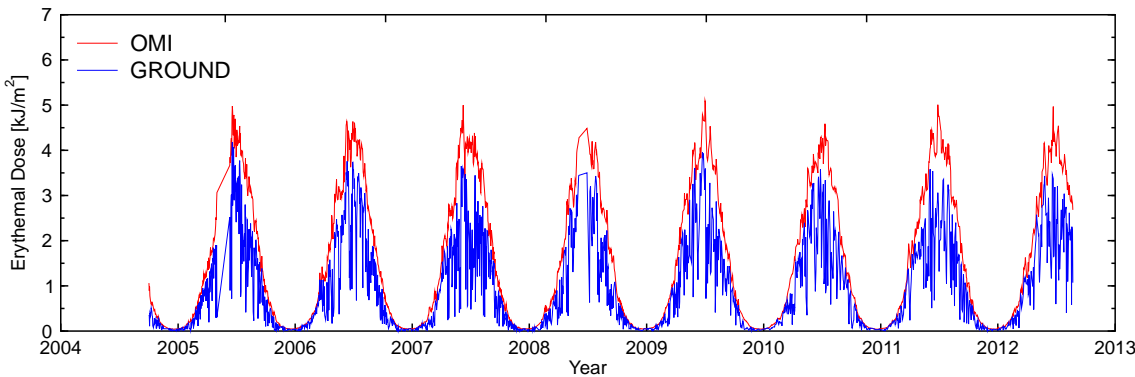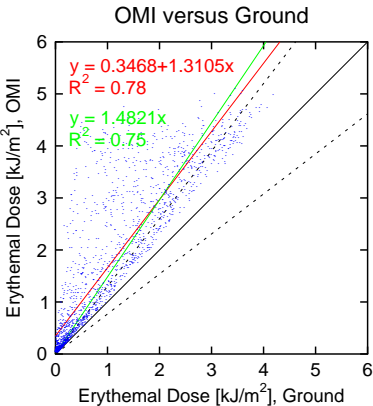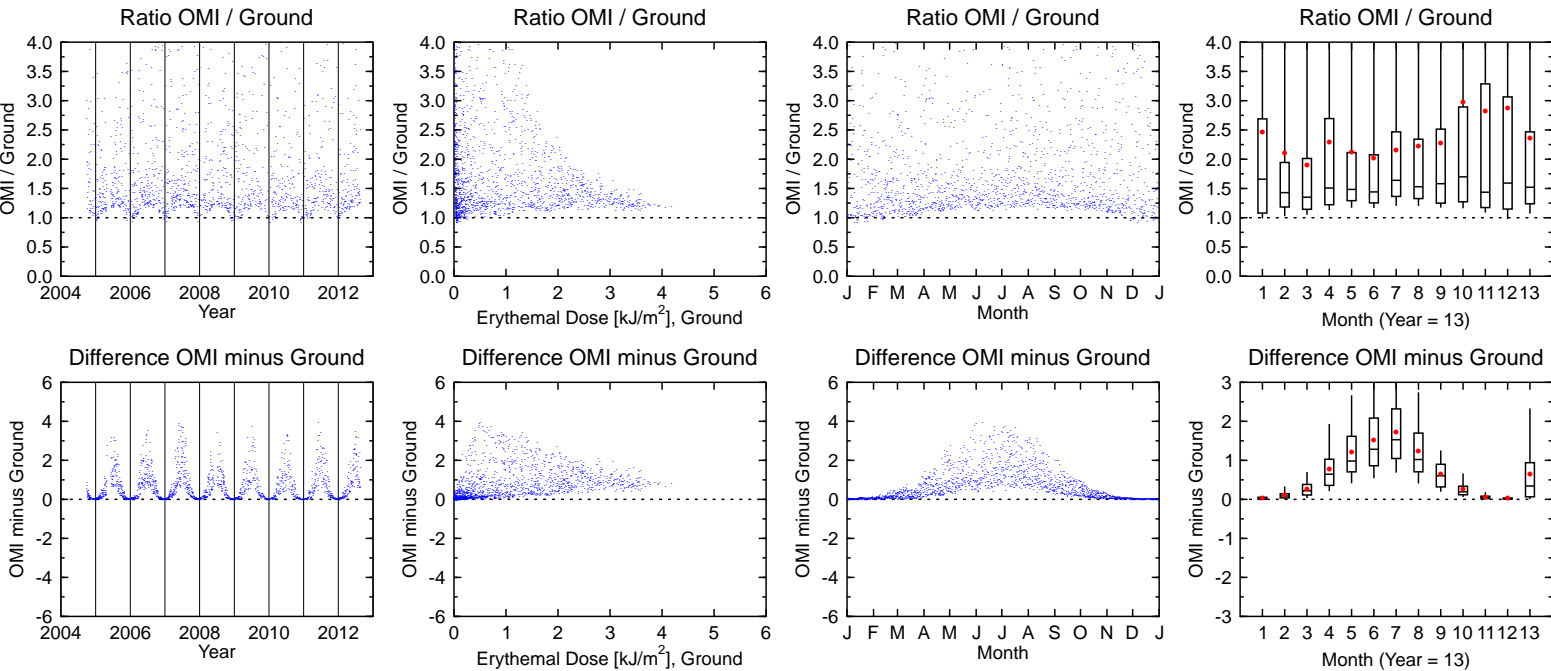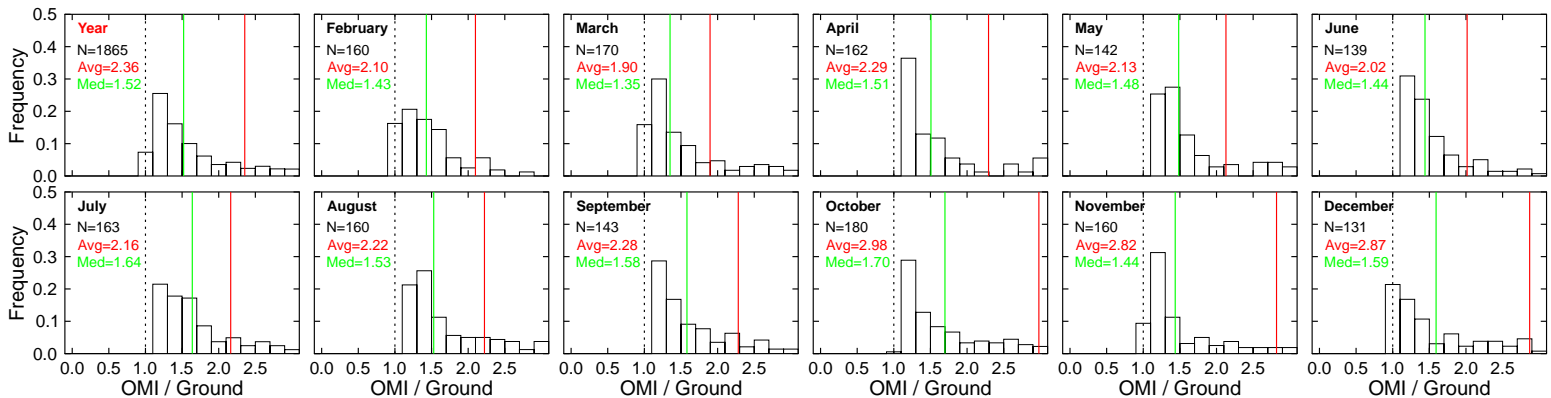

Supplement: Supplementary file 33 [file acp-15-7391-2015-supplement.zip]
