# Supplementary material for: Comparison of OMI UV observations with ground-based measurements at high northern latitudes
Source: Copernicus journal article supplement (doi:10.5194/acp-15-7391-2015), 2015-07-09

Andoya, Norway (69.28°N, 16.01°E)

EDRate (Ground at local solar noon), SZA less than 84, Dist less than 12 km

| Month     | N    | Minimum | 5%   | 25%  | Median | Average | 75%  | 95%  | Maximum | W10 | W20 | W30 |
|-----------|------|---------|------|------|--------|---------|------|------|---------|-----|-----|-----|
| January   | 0    | 0.00    | 0.00 | 0.00 | 0.00   | 0.00    | 0.00 | 0.00 | 0.00    | 0   | 0   | 0   |
| February  | 133  | 0.51    | 0.63 | 0.91 | 0.98   | 1.04    | 1.14 | 1.58 | 2.60    | 46  | 68  | 78  |
| March     | 314  | 0.46    | 0.59 | 0.83 | 0.95   | 1.03    | 1.06 | 1.74 | 4.14    | 39  | 58  | 69  |
| April     | 278  | 0.40    | 0.71 | 0.94 | 1.04   | 1.23    | 1.35 | 2.33 | 5.53    | 37  | 53  | 65  |
| May       | 258  | 0.51    | 0.89 | 1.09 | 1.32   | 1.75    | 2.06 | 3.66 | 8.02    | 20  | 37  | 48  |
| June      | 238  | 0.62    | 0.87 | 1.07 | 1.24   | 1.53    | 1.79 | 3.14 | 6.60    | 27  | 43  | 53  |
| July      | 276  | 0.50    | 0.80 | 1.05 | 1.30   | 1.76    | 1.82 | 3.83 | 12.70   | 23  | 33  | 46  |
| August    | 282  | 0.50    | 0.79 | 1.01 | 1.19   | 1.49    | 1.64 | 2.76 | 18.65   | 27  | 42  | 55  |
| September | 255  | 0.47    | 0.79 | 1.06 | 1.26   | 1.54    | 1.74 | 3.10 | 8.05    | 21  | 35  | 51  |
| October   | 260  | 0.29    | 0.65 | 0.96 | 1.14   | 1.49    | 1.73 | 3.81 | 5.66    | 27  | 44  | 54  |
| November  | 5    | 0.88    | 0.88 | 0.99 | 1.37   | 1.57    | 1.54 | 3.08 | 3.08    | 20  | 40  | 40  |
| December  | 0    | 0.00    | 0.00 | 0.00 | 0.00   | 0.00    | 0.00 | 0.00 | 0.00    | 0   | 0   | 0   |
| Year      | 2299 | 0.29    | 0.73 | 0.97 | 1.14   | 1.44    | 1.56 | 3.05 | 18.65   | 29  | 45  | 57  |

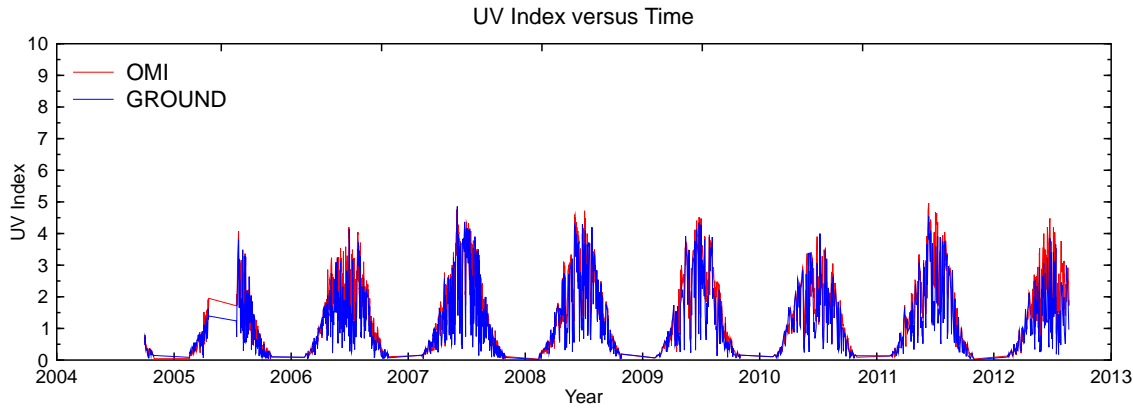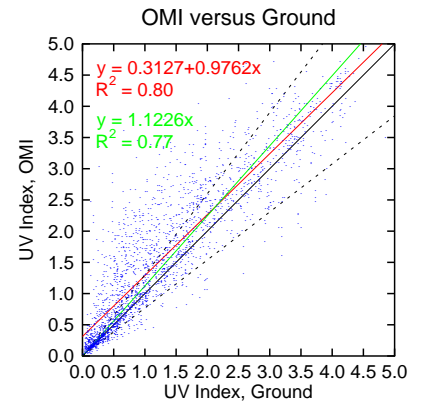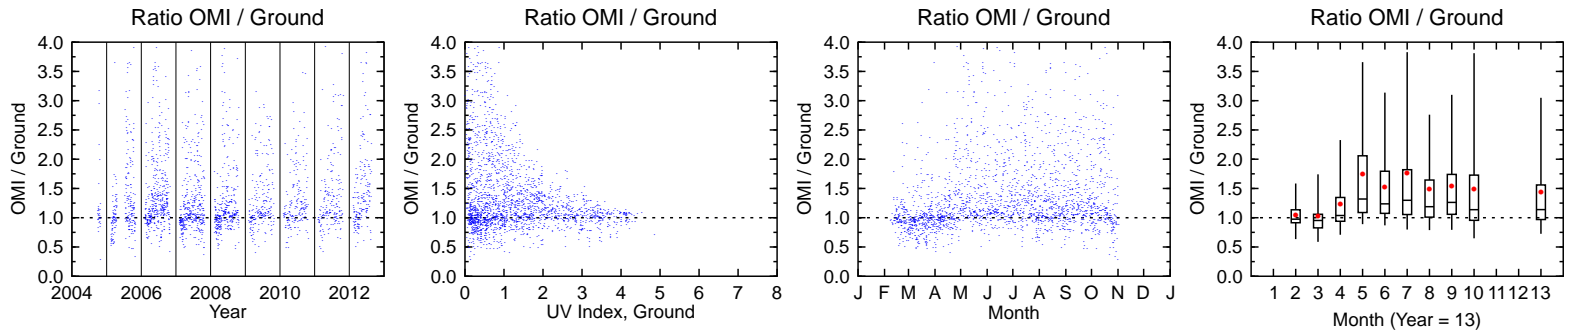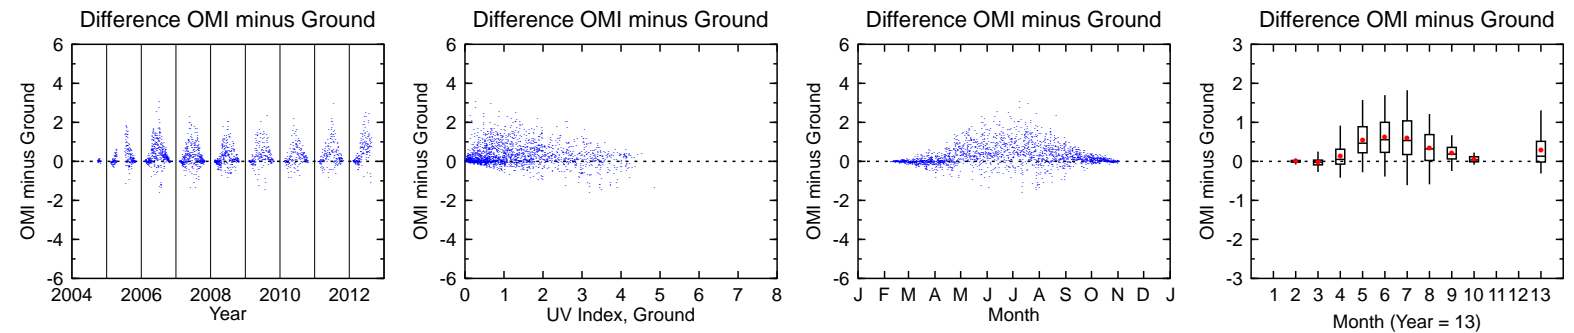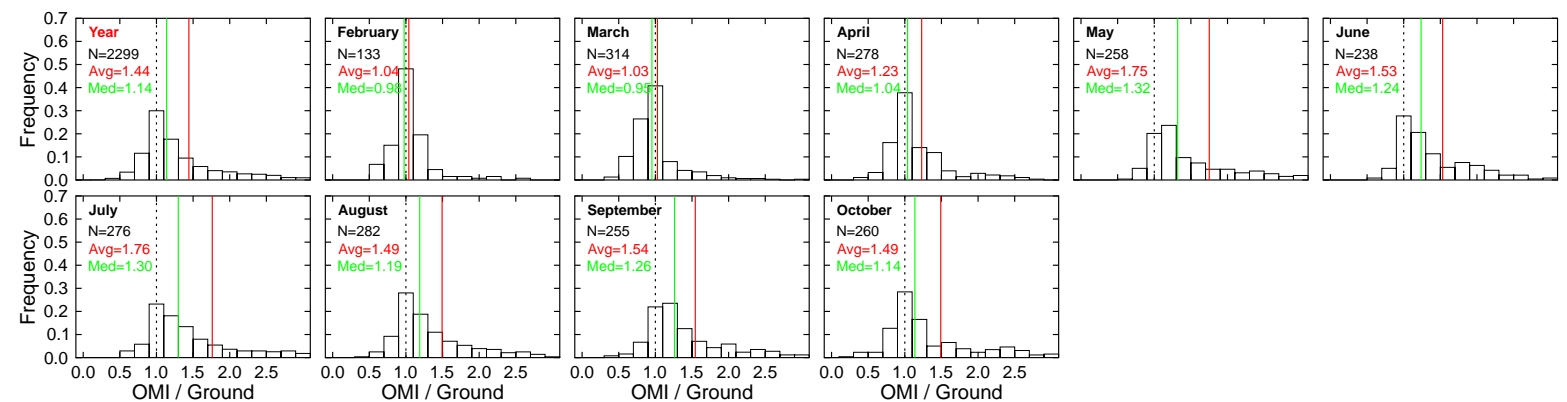

Supplement: Supplementary file 34 [file acp-15-7391-2015-supplement.zip]
