# Supplementary material for: Comparison of OMI UV observations with ground-based measurements at high northern latitudes
Source: Copernicus journal article supplement (doi:10.5194/acp-15-7391-2015), 2015-07-09

Finse, Norway (60.60°N, 7.52°E)  
CSEDDose, SZA less than 84, Dist less than 12 km

| Month     | N    | Minimum | 5%   | 25%  | Median | Average | 75%  | 95%  | Maximum | W10 | W20 | W30 |
|-----------|------|---------|------|------|--------|---------|------|------|---------|-----|-----|-----|
| January   | 24   | 0.79    | 0.80 | 0.84 | 0.91   | 0.94    | 1.00 | 1.16 | 1.27    | 38  | 75  | 100 |
| February  | 66   | 0.75    | 0.79 | 0.87 | 0.91   | 0.93    | 0.96 | 1.17 | 1.28    | 41  | 82  | 98  |
| March     | 104  | 0.82    | 0.84 | 0.89 | 0.95   | 0.98    | 1.00 | 1.27 | 1.75    | 57  | 90  | 95  |
| April     | 139  | 0.79    | 0.84 | 0.89 | 0.94   | 1.02    | 1.10 | 1.46 | 2.15    | 44  | 83  | 91  |
| May       | 144  | 0.79    | 0.84 | 0.94 | 1.02   | 1.11    | 1.16 | 1.69 | 2.77    | 49  | 75  | 85  |
| June      | 145  | 0.90    | 0.92 | 1.02 | 1.22   | 1.58    | 1.73 | 3.72 | 5.67    | 32  | 48  | 56  |
| July      | 159  | 1.01    | 1.06 | 1.20 | 1.58   | 2.04    | 2.51 | 4.71 | 8.01    | 7   | 25  | 31  |
| August    | 152  | 1.03    | 1.13 | 1.32 | 1.68   | 2.07    | 2.31 | 4.50 | 8.24    | 2   | 10  | 20  |
| September | 124  | 0.96    | 1.09 | 1.30 | 1.70   | 2.07    | 2.32 | 4.38 | 8.25    | 7   | 19  | 26  |
| October   | 156  | 0.76    | 0.85 | 1.08 | 1.26   | 1.86    | 1.97 | 4.73 | 11.47   | 17  | 42  | 54  |
| November  | 95   | 0.78    | 0.84 | 0.93 | 1.03   | 1.21    | 1.19 | 1.86 | 6.42    | 44  | 72  | 80  |
| December  | 13   | 0.81    | 0.81 | 0.84 | 1.01   | 0.98    | 1.11 | 1.12 | 1.12    | 38  | 77  | 100 |
| Year      | 1321 | 0.75    | 0.85 | 0.96 | 1.16   | 1.54    | 1.64 | 3.54 | 11.47   | 28  | 52  | 61  |

Erythemal Dose [kJ/m<sup>2</sup>] versus Time

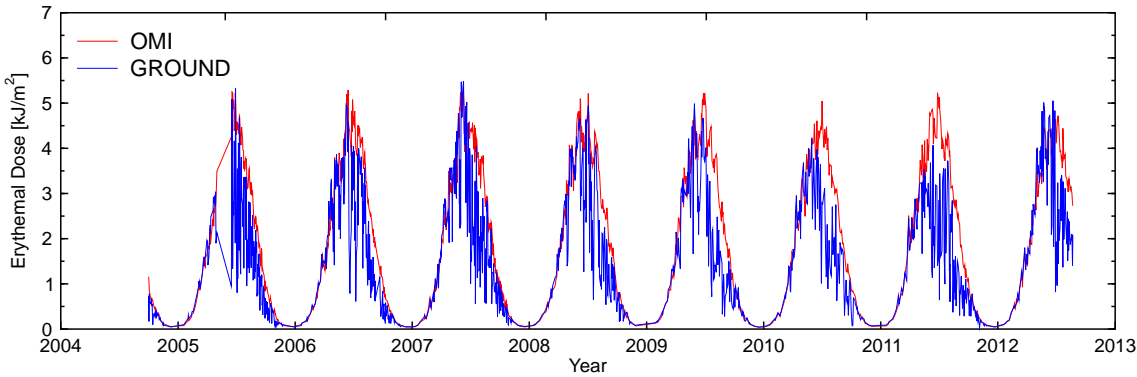

OMI versus Ground

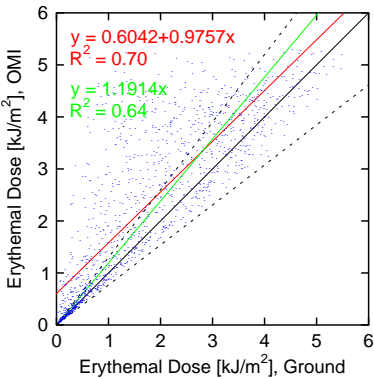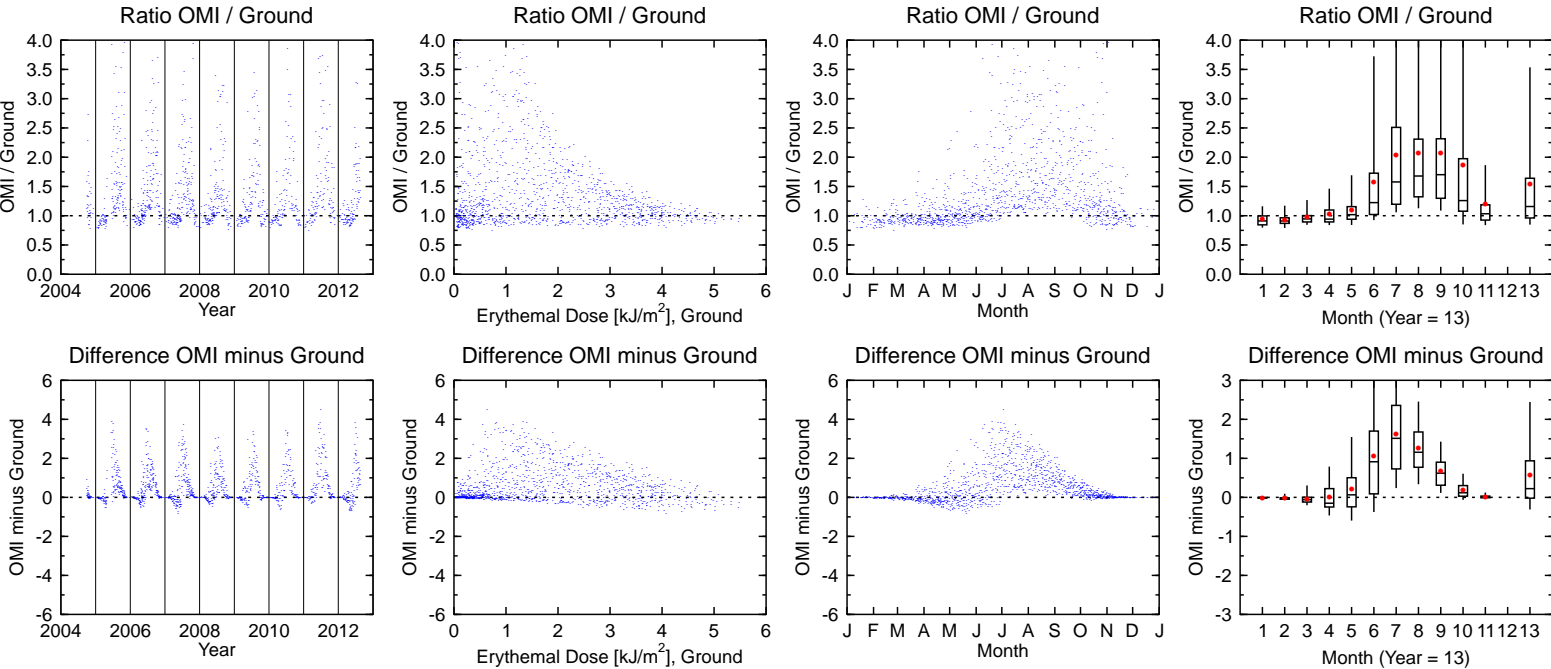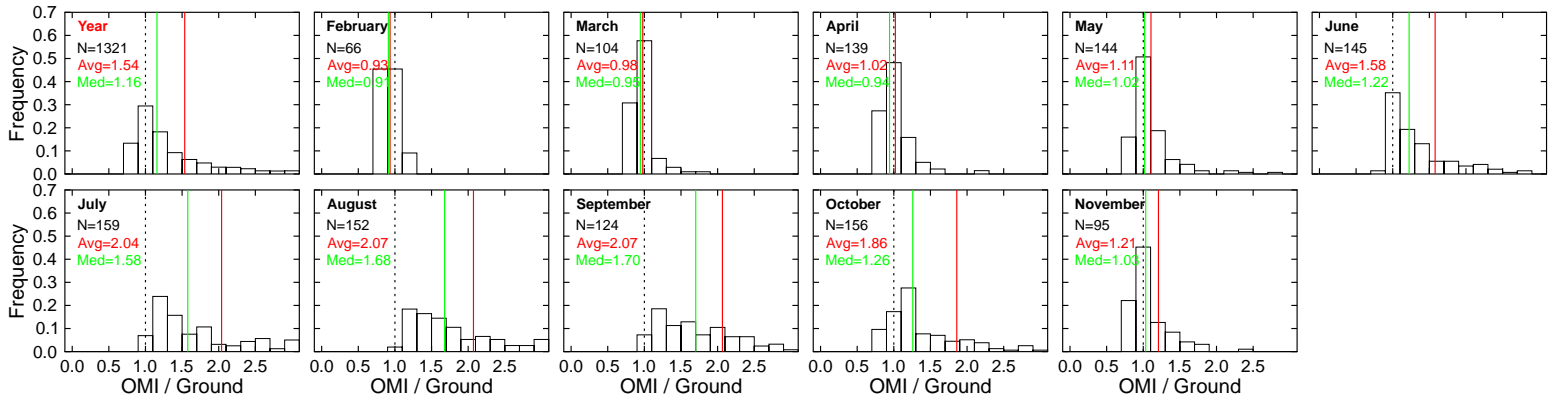

Supplement: Supplementary file 35 [file acp-15-7391-2015-supplement.zip]
