# Supplementary material for: Comparison of OMI UV observations with ground-based measurements at high northern latitudes
Source: Copernicus journal article supplement (doi:10.5194/acp-15-7391-2015), 2015-07-09

Ny-Alesund, Svalbard (78.92°N, 11.92°E)

EDRate (Ground at local solar noon), SZA less than 84, Dist less than 12 km

| Month     | N    | Minimum | 5%   | 25%  | Median | Average | 75%  | 95%  | Maximum | W10 | W20 | W30 |
|-----------|------|---------|------|------|--------|---------|------|------|---------|-----|-----|-----|
| January   | 0    | 0.00    | 0.00 | 0.00 | 0.00   | 0.00    | 0.00 | 0.00 | 0.00    | 0   | 0   | 0   |
| February  | 0    | 0.00    | 0.00 | 0.00 | 0.00   | 0.00    | 0.00 | 0.00 | 0.00    | 0   | 0   | 0   |
| March     | 277  | 0.21    | 0.29 | 0.44 | 0.60   | 0.60    | 0.74 | 1.03 | 1.28    | 5   | 11  | 22  |
| April     | 490  | 0.13    | 0.26 | 0.48 | 0.59   | 0.60    | 0.73 | 0.90 | 1.97    | 2   | 9   | 17  |
| May       | 434  | 0.20    | 0.41 | 0.52 | 0.61   | 0.65    | 0.73 | 0.97 | 2.08    | 5   | 11  | 18  |
| June      | 409  | 0.39    | 0.54 | 0.69 | 0.81   | 0.85    | 0.97 | 1.31 | 2.18    | 22  | 39  | 55  |
| July      | 466  | 0.50    | 0.74 | 0.91 | 1.05   | 1.17    | 1.27 | 2.12 | 3.48    | 35  | 57  | 71  |
| August    | 462  | 0.42    | 0.69 | 0.93 | 1.09   | 1.17    | 1.36 | 1.84 | 4.58    | 28  | 50  | 64  |
| September | 405  | 0.34    | 0.53 | 0.73 | 0.89   | 0.94    | 1.10 | 1.51 | 2.63    | 22  | 40  | 60  |
| October   | 26   | 0.45    | 0.47 | 0.58 | 0.68   | 0.79    | 0.90 | 1.60 | 1.85    | 8   | 19  | 27  |
| November  | 0    | 0.00    | 0.00 | 0.00 | 0.00   | 0.00    | 0.00 | 0.00 | 0.00    | 0   | 0   | 0   |
| December  | 0    | 0.00    | 0.00 | 0.00 | 0.00   | 0.00    | 0.00 | 0.00 | 0.00    | 0   | 0   | 0   |
| Year      | 2969 | 0.13    | 0.39 | 0.61 | 0.80   | 0.87    | 1.04 | 1.58 | 4.58    | 18  | 32  | 44  |

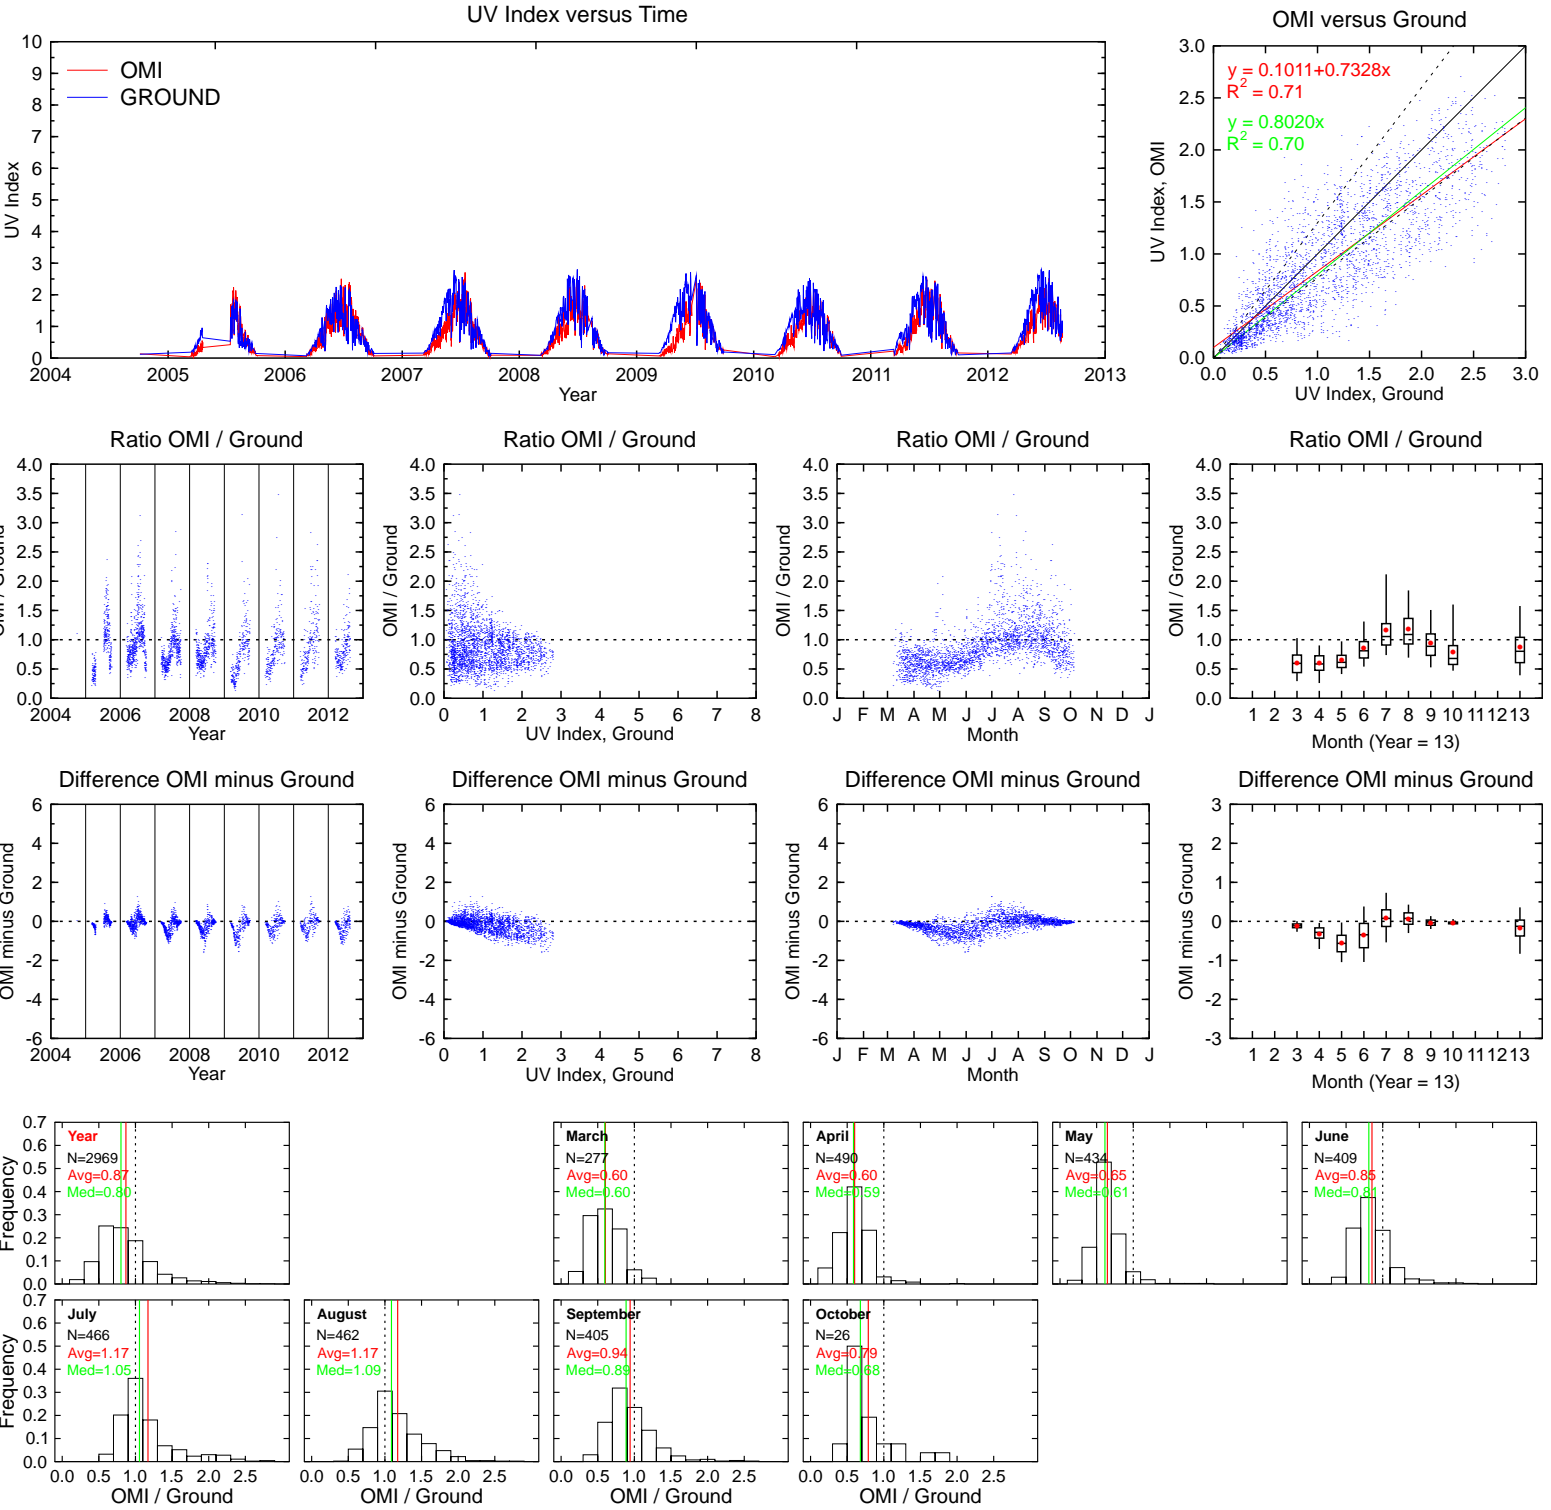

Supplement: Supplementary file 36 [file acp-15-7391-2015-supplement.zip]
