# Supplementary material for: Comparison of OMI UV observations with ground-based measurements at high northern latitudes
Source: Copernicus journal article supplement (doi:10.5194/acp-15-7391-2015), 2015-07-09

Andoya, Norway (69.28°N, 16.01°E)

OPEDRate, SZA less than 84, Dist less than 12 km

| Month     | N    | Minimum | 5%   | 25%  | Median | Average | 75%  | 95%  | Maximum | W10 | W20 | W30 |
|-----------|------|---------|------|------|--------|---------|------|------|---------|-----|-----|-----|
| January   | 0    | 0.00    | 0.00 | 0.00 | 0.00   | 0.00    | 0.00 | 0.00 | 0.00    | 0   | 0   | 0   |
| February  | 135  | 0.48    | 0.65 | 0.96 | 1.04   | 1.12    | 1.18 | 1.73 | 2.86    | 47  | 65  | 76  |
| March     | 320  | 0.43    | 0.66 | 0.87 | 0.99   | 1.02    | 1.08 | 1.50 | 3.74    | 44  | 63  | 76  |
| April     | 281  | 0.49    | 0.75 | 0.97 | 1.07   | 1.30    | 1.36 | 2.56 | 6.55    | 38  | 59  | 66  |
| May       | 258  | 0.70    | 0.91 | 1.08 | 1.27   | 1.69    | 1.97 | 3.38 | 15.33   | 26  | 41  | 51  |
| June      | 238  | 0.69    | 0.91 | 1.07 | 1.25   | 1.52    | 1.75 | 2.90 | 7.87    | 27  | 45  | 56  |
| July      | 278  | 0.58    | 0.78 | 1.02 | 1.25   | 1.52    | 1.77 | 2.91 | 8.34    | 26  | 38  | 49  |
| August    | 283  | 0.50    | 0.76 | 1.00 | 1.14   | 1.34    | 1.49 | 2.50 | 4.03    | 31  | 45  | 57  |
| September | 255  | 0.58    | 0.82 | 1.02 | 1.19   | 1.46    | 1.53 | 3.42 | 6.39    | 26  | 46  | 59  |
| October   | 261  | 0.46    | 0.75 | 0.99 | 1.17   | 1.49    | 1.68 | 3.20 | 7.88    | 26  | 43  | 58  |
| November  | 5    | 0.70    | 0.70 | 0.77 | 0.95   | 1.39    | 2.03 | 2.49 | 2.49    | 20  | 20  | 40  |
| December  | 0    | 0.00    | 0.00 | 0.00 | 0.00   | 0.00    | 0.00 | 0.00 | 0.00    | 0   | 0   | 0   |
| Year      | 2314 | 0.43    | 0.75 | 0.99 | 1.12   | 1.39    | 1.50 | 2.82 | 15.33   | 32  | 49  | 60  |

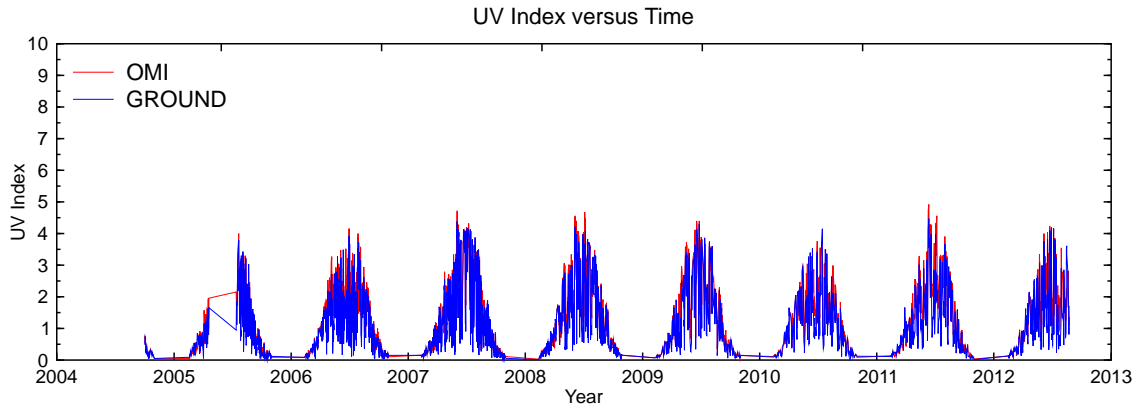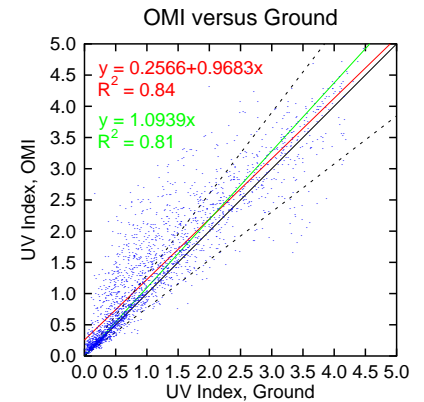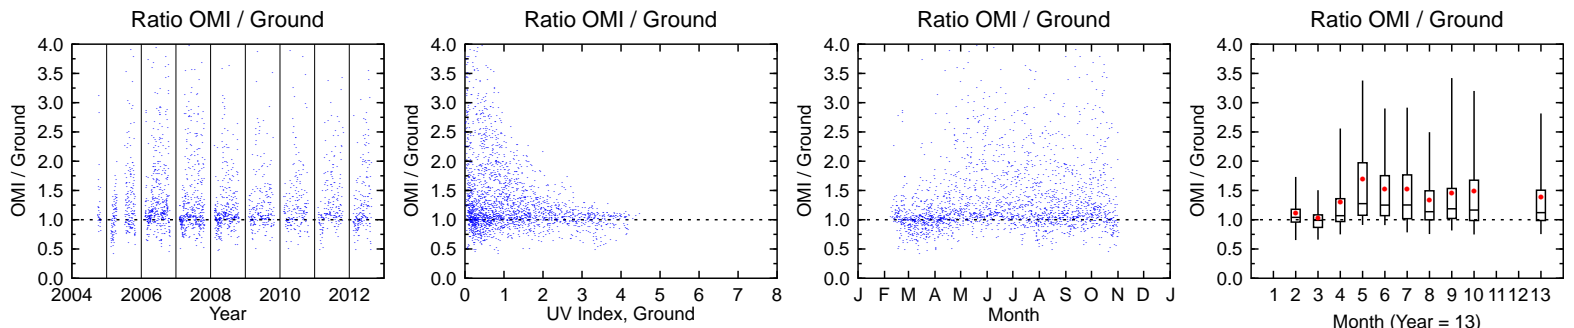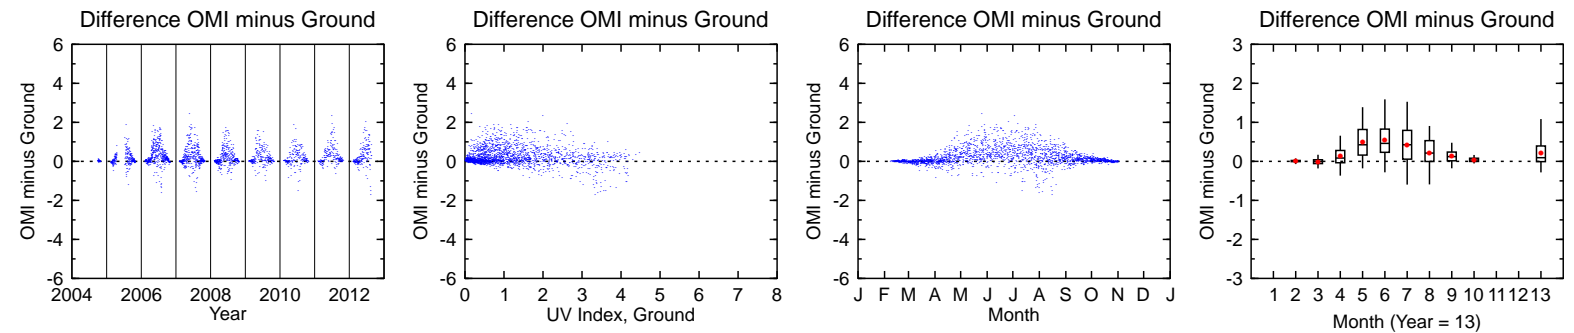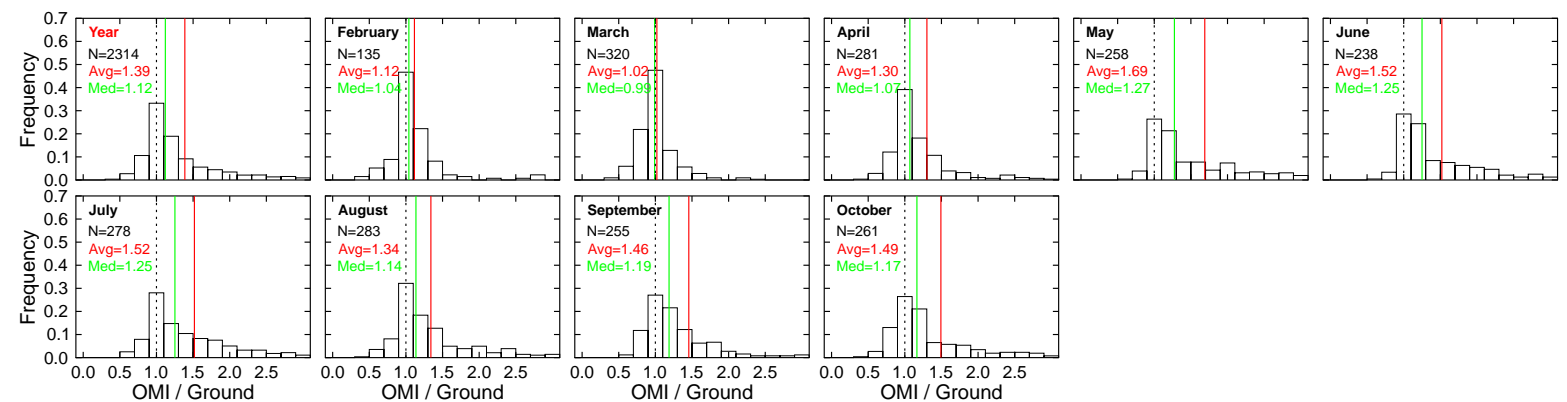

Supplement: Supplementary file 37 [file acp-15-7391-2015-supplement.zip]
