# Supplementary material for: Comparison of OMI UV observations with ground-based measurements at high northern latitudes
Source: Copernicus journal article supplement (doi:10.5194/acp-15-7391-2015), 2015-07-09
Supplement: Supplementary file 38 [file acp-15-7391-2015-supplement.zip]

Archive with 9 entries (9 files):
- OPEDRate_SZA_less_than_84_Dis_less_than_12.zip
- EDDose_SZA_less_than_84_Dis_less_than_12.zip
- EDRate_SZA_less_than_84_Dis_less_than_12.zip
- CSEDDose_SZA_less_than_84_Dis_less_than_12.zip
- acp-15-7391-2015-supplement-cover-letter.pdf
- Readme.pdf
- EDDose.zip
- Validation_statistics_overpass.pdf
- CSEDRate_SZA_less_than_84_Dis_less_than_12.zip
