# Supplementary material for: Comparison of OMI UV observations with ground-based measurements at high northern latitudes
Source: Copernicus journal article supplement (doi:10.5194/acp-15-7391-2015), 2015-07-09
Supplement: Supplementary file 38 [file acp-15-7391-2015-supplement.zip › Readme.pdf]

## Contents of zip file

This zip file contains:

- The pdf file “**Validation\_statistics\_overpass.pdf**”, which includes a table with validation statistics for overpass erythema dose rate. This table is similar to Table 2 of the paper but provides statistics for overpass erythema dose rate (DP (1)) instead of daily erythema dose (DP (4)).
- Six zip files containing plots similar to that shown in Appendix A / Figure 14 of the paper. The contents of the 6 files are indicated by their filename, specifically:

### **OPEDRate\_SZA\_less\_than\_84\_Dis\_less\_than\_12.zip**

Data product (1): Overpass Erythema Dose Rate, filtered for  $SZA < 84^\circ$  and  $Dis < 12$  km

### **EDRate\_SZA\_less\_than\_84\_Dis\_less\_than\_12.zip**

Data product (2): Erythema Daily Dose Rate, filtered for  $SZA < 84^\circ$  and  $Dis < 12$  km

### **CSEDRate\_SZA\_less\_than\_84\_Dis\_less\_than\_12.zip**

Data product (3): Clear Sky Erythema Daily Dose Rate, filtered for  $SZA < 84^\circ$  and  $Dis < 12$  km

### **EDDose.zip**

Data product (4): Erythema Daily Dose

### **EDDose\_SZA\_less\_than\_84\_Dis\_less\_than\_12.zip**

Data product (4): Erythema Daily Dose, filtered for  $SZA < 84^\circ$  and  $Dis < 12$  km

### **CSEDDose\_SZA\_less\_than\_84\_Dis\_less\_than\_12.zip:**

Data product (5): Clear Sky Erythema Daily Dose, filtered for  $SZA < 84^\circ$  and  $Dis < 12$  km

See also Table 1 of the paper for explanation of data product names and acronyms.

In each zip file, sites are identified by a 3 letter code:

|      |            |
|------|------------|
| ALT: | Alert      |
| AND: | Andøya     |
| BAR: | Barrow     |
| BLI: | Blindern   |
| EUR: | Eureka     |
| FIN: | Finse      |
| JOK: | Jokioinen  |
| NYA: | Ny-Ålesund |
| OST: | Østerås    |
| RES: | Resolute   |
| SOD: | Sodankylä  |
| SUM: | Summit     |
| TRH: | Trondheim  |
