# Supplementary material for: Comparison of OMI UV observations with ground-based measurements at high northern latitudes
Source: Copernicus journal article supplement (doi:10.5194/acp-15-7391-2015), 2015-07-09

Barrow, Alaska (71.32°N, 156.68°E)  
EDDose, SZA less than 84, Dist less than 12 km

| Month     | N    | Minimum | 5%   | 25%  | Median | Average | 75%  | 95%  | Maximum | W10 | W20 | W30 |
|-----------|------|---------|------|------|--------|---------|------|------|---------|-----|-----|-----|
| January   | 0    | 0.00    | 0.00 | 0.00 | 0.00   | 0.00    | 0.00 | 0.00 | 0.00    | 0   | 0   | 0   |
| February  | 39   | 0.81    | 0.84 | 0.90 | 0.92   | 0.96    | 1.00 | 1.23 | 1.44    | 62  | 92  | 97  |
| March     | 100  | 0.71    | 0.89 | 0.97 | 0.99   | 1.01    | 1.05 | 1.16 | 1.37    | 79  | 96  | 98  |
| April     | 100  | 0.82    | 0.89 | 1.03 | 1.09   | 1.11    | 1.16 | 1.40 | 1.60    | 50  | 82  | 90  |
| May       | 121  | 0.61    | 0.95 | 1.10 | 1.19   | 1.21    | 1.30 | 1.55 | 1.94    | 21  | 51  | 74  |
| June      | 158  | 0.29    | 0.61 | 0.84 | 0.98   | 0.97    | 1.10 | 1.32 | 1.55    | 38  | 64  | 77  |
| July      | 180  | 0.71    | 0.84 | 0.98 | 1.10   | 1.10    | 1.18 | 1.37 | 2.08    | 38  | 74  | 88  |
| August    | 175  | 0.64    | 0.89 | 1.09 | 1.18   | 1.19    | 1.28 | 1.49 | 2.54    | 21  | 53  | 83  |
| September | 175  | 0.93    | 1.03 | 1.22 | 1.38   | 1.43    | 1.56 | 1.95 | 2.95    | 8   | 21  | 35  |
| October   | 155  | 0.86    | 1.22 | 1.40 | 1.62   | 1.68    | 1.90 | 2.46 | 2.89    | 1   | 5   | 10  |
| November  | 0    | 0.00    | 0.00 | 0.00 | 0.00   | 0.00    | 0.00 | 0.00 | 0.00    | 0   | 0   | 0   |
| December  | 0    | 0.00    | 0.00 | 0.00 | 0.00   | 0.00    | 0.00 | 0.00 | 0.00    | 0   | 0   | 0   |
| Year      | 1203 | 0.29    | 0.85 | 1.02 | 1.16   | 1.22    | 1.35 | 1.87 | 2.95    | 30  | 54  | 68  |

Erythemal Dose [kJ/m<sup>2</sup>] versus Time

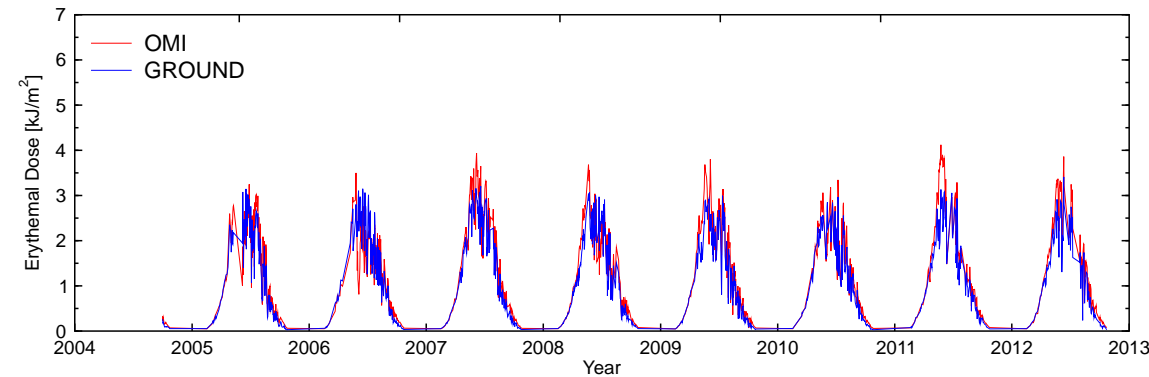

OMI versus Ground

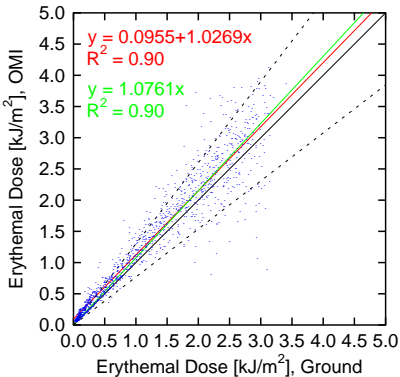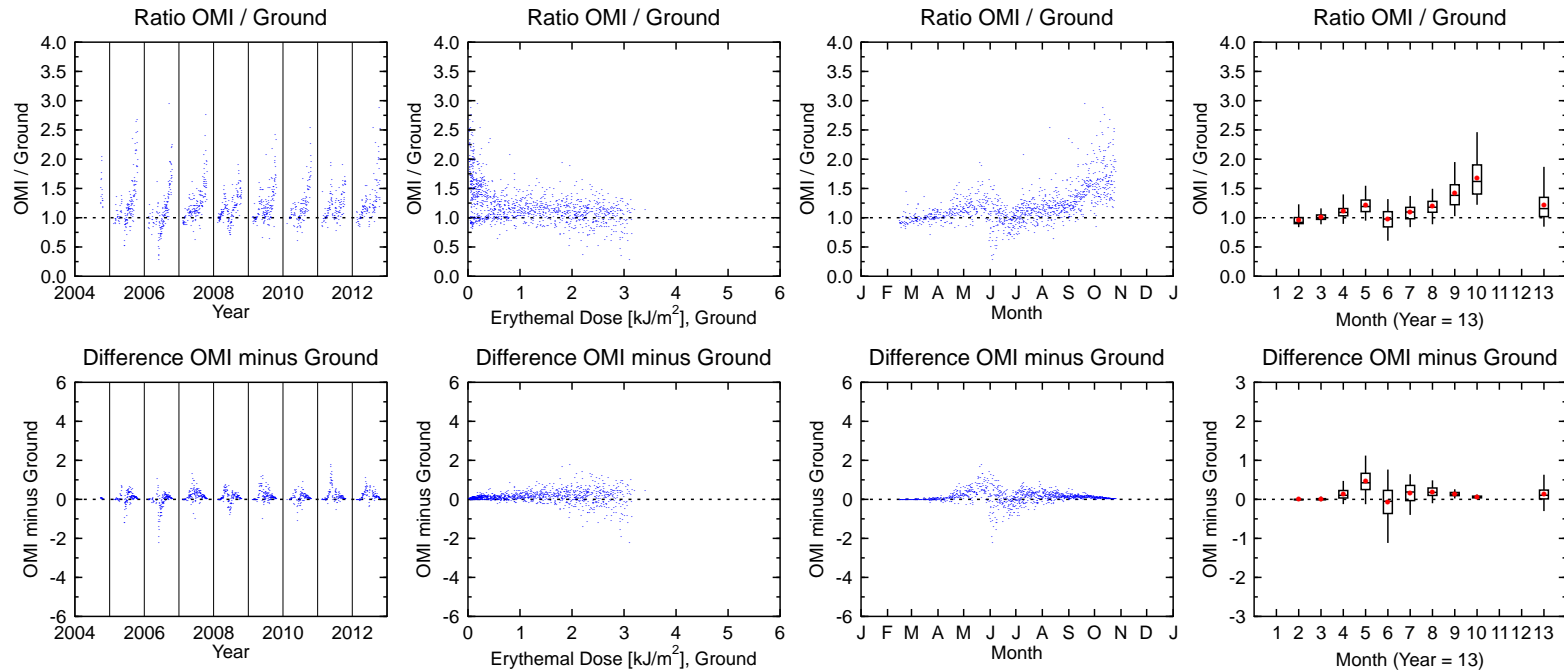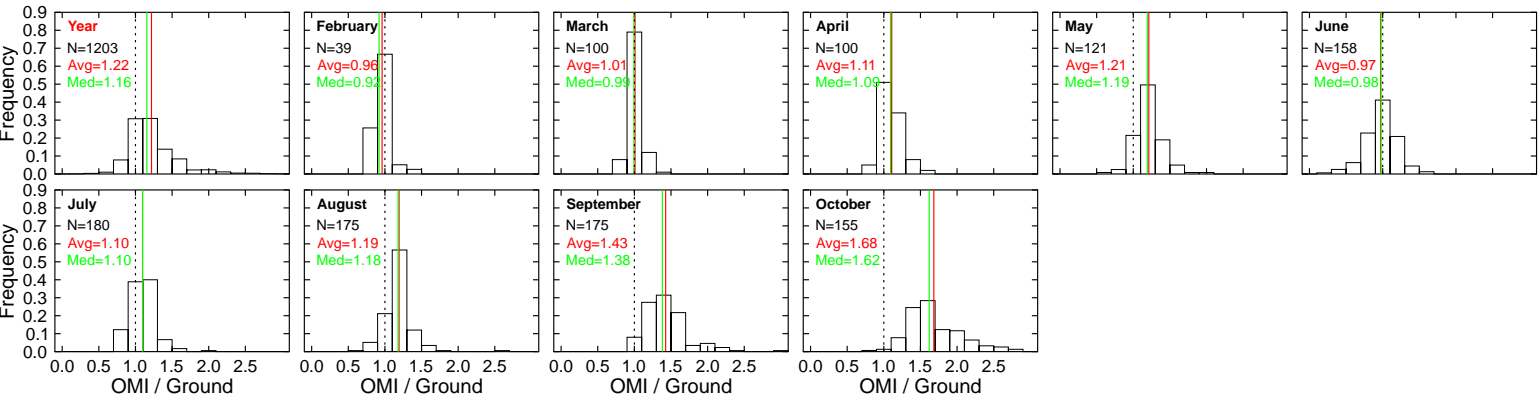

Supplement: Supplementary file 39 [file acp-15-7391-2015-supplement.zip]
