# Supplementary material for: Comparison of OMI UV observations with ground-based measurements at high northern latitudes
Source: Copernicus journal article supplement (doi:10.5194/acp-15-7391-2015), 2015-07-09

Blindern, Norway (59.94°N, 10.72°E)  
EDDose, SZA less than 84, Dist less than 12 km

| Month     | N    | Minimum | 5%   | 25%  | Median | Average | 75%  | 95%  | Maximum | W10 | W20 | W30 |
|-----------|------|---------|------|------|--------|---------|------|------|---------|-----|-----|-----|
| January   | 155  | 0.47    | 0.71 | 0.92 | 1.04   | 1.23    | 1.33 | 2.62 | 3.69    | 35  | 54  | 66  |
| February  | 160  | 0.65    | 0.72 | 0.84 | 0.94   | 1.06    | 1.12 | 1.91 | 3.13    | 26  | 57  | 75  |
| March     | 170  | 0.61    | 0.74 | 0.86 | 1.01   | 1.07    | 1.17 | 1.64 | 2.74    | 30  | 59  | 76  |
| April     | 162  | 0.74    | 0.83 | 1.01 | 1.10   | 1.19    | 1.26 | 1.88 | 3.45    | 42  | 65  | 79  |
| May       | 142  | 0.65    | 0.82 | 0.99 | 1.07   | 1.12    | 1.16 | 1.74 | 2.48    | 48  | 75  | 84  |
| June      | 139  | 0.55    | 0.81 | 1.05 | 1.12   | 1.13    | 1.20 | 1.42 | 2.80    | 32  | 71  | 86  |
| July      | 163  | 0.52    | 0.82 | 1.01 | 1.07   | 1.10    | 1.17 | 1.50 | 1.96    | 48  | 72  | 86  |
| August    | 160  | 0.53    | 0.86 | 1.02 | 1.11   | 1.17    | 1.24 | 1.67 | 2.50    | 39  | 64  | 78  |
| September | 143  | 0.57    | 0.78 | 1.03 | 1.11   | 1.17    | 1.24 | 1.73 | 2.54    | 35  | 62  | 77  |
| October   | 180  | 0.27    | 0.70 | 1.03 | 1.14   | 1.27    | 1.31 | 2.50 | 5.50    | 28  | 54  | 67  |
| November  | 160  | 0.61    | 0.77 | 0.98 | 1.11   | 1.30    | 1.33 | 2.56 | 4.31    | 34  | 59  | 70  |
| December  | 131  | 0.33    | 0.72 | 0.92 | 1.02   | 1.24    | 1.38 | 2.43 | 5.25    | 37  | 51  | 63  |
| Year      | 1865 | 0.27    | 0.76 | 0.96 | 1.08   | 1.17    | 1.23 | 1.96 | 5.50    | 36  | 62  | 75  |

Erythemal Dose [kJ/m<sup>2</sup>] versus Time

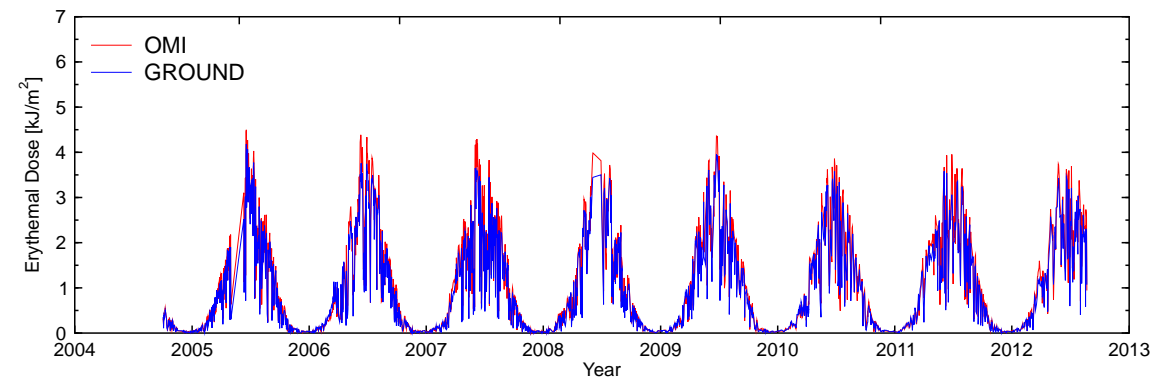

OMI versus Ground

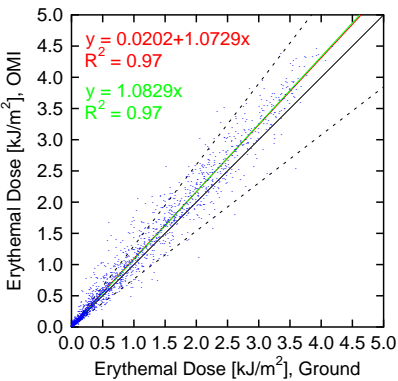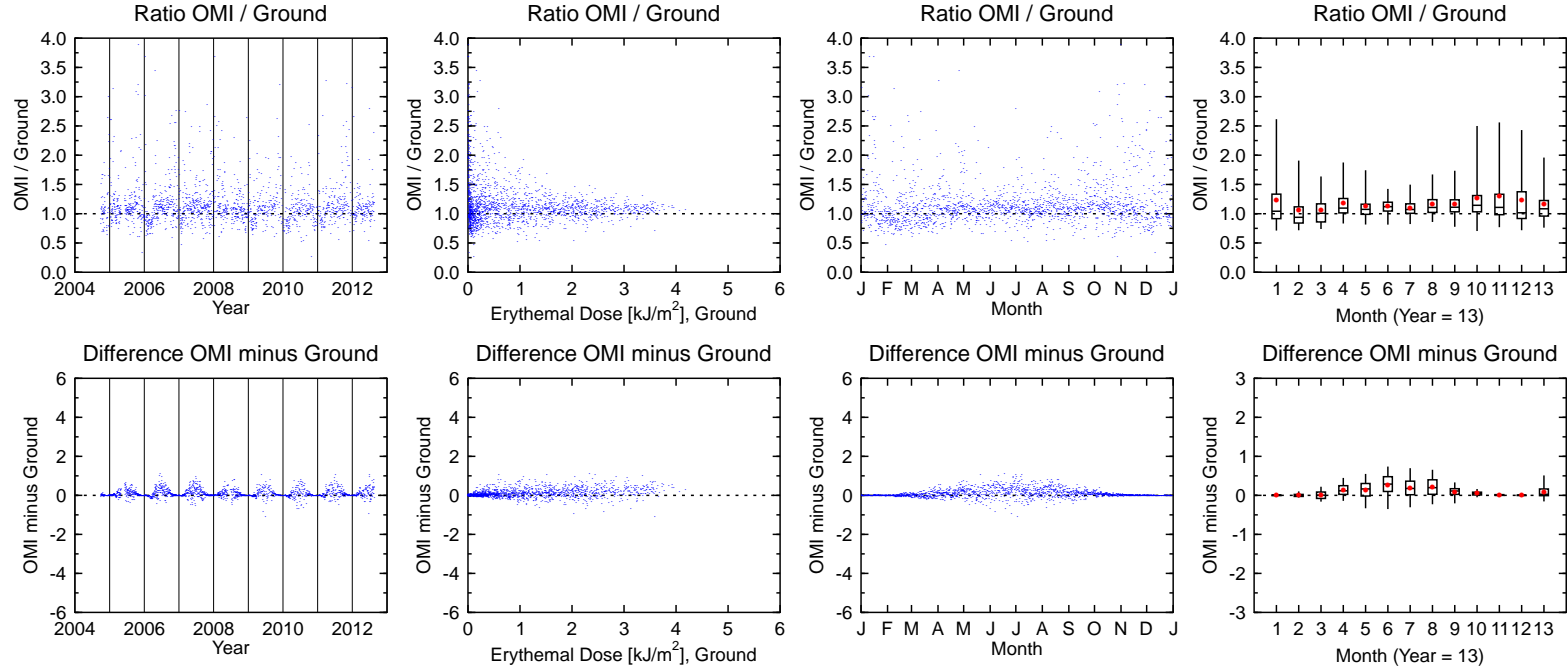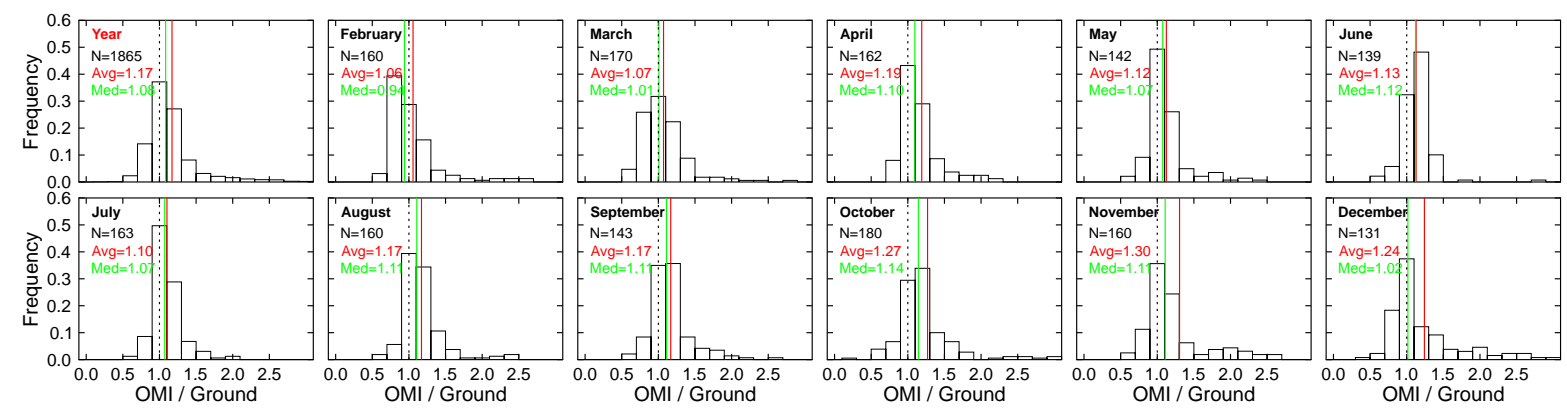

Supplement: Supplementary file 40 [file acp-15-7391-2015-supplement.zip]
