# Supplementary material for: Comparison of OMI UV observations with ground-based measurements at high northern latitudes
Source: Copernicus journal article supplement (doi:10.5194/acp-15-7391-2015), 2015-07-09

Finse, Norway (60.60°N, 7.52°E)

EDRate (Ground at local solar noon), SZA less than 84, Dist less than 12 km

| Month     | N    | Minimum | 5%   | 25%  | Median | Average | 75%  | 95%  | Maximum | W10 | W20 | W30 |
|-----------|------|---------|------|------|--------|---------|------|------|---------|-----|-----|-----|
| January   | 25   | 0.19    | 0.23 | 0.30 | 0.44   | 0.56    | 0.85 | 1.04 | 1.15    | 16  | 32  | 32  |
| February  | 73   | 0.15    | 0.21 | 0.33 | 0.46   | 0.50    | 0.60 | 0.95 | 1.08    | 5   | 11  | 15  |
| March     | 115  | 0.14    | 0.16 | 0.29 | 0.44   | 0.47    | 0.61 | 0.85 | 1.10    | 3   | 6   | 10  |
| April     | 160  | 0.13    | 0.16 | 0.25 | 0.37   | 0.45    | 0.59 | 0.93 | 2.22    | 4   | 8   | 11  |
| May       | 179  | 0.14    | 0.23 | 0.38 | 0.55   | 0.58    | 0.73 | 1.03 | 1.46    | 9   | 15  | 19  |
| June      | 187  | 0.39    | 0.50 | 0.65 | 0.82   | 0.97    | 1.06 | 2.14 | 4.41    | 15  | 29  | 38  |
| July      | 216  | 0.49    | 0.55 | 0.76 | 0.96   | 1.09    | 1.16 | 2.15 | 4.46    | 24  | 38  | 55  |
| August    | 204  | 0.45    | 0.66 | 0.87 | 1.00   | 1.25    | 1.43 | 2.53 | 6.15    | 29  | 43  | 58  |
| September | 160  | 0.24    | 0.57 | 0.84 | 1.04   | 1.19    | 1.40 | 2.36 | 3.48    | 28  | 46  | 56  |
| October   | 204  | 0.10    | 0.24 | 0.47 | 0.83   | 0.99    | 1.18 | 2.47 | 4.93    | 13  | 27  | 34  |
| November  | 109  | 0.11    | 0.17 | 0.25 | 0.52   | 0.59    | 0.82 | 1.48 | 2.70    | 7   | 17  | 21  |
| December  | 13   | 0.13    | 0.13 | 0.25 | 0.31   | 0.36    | 0.39 | 0.92 | 0.92    | 8   | 8   | 8   |
| Year      | 1645 | 0.10    | 0.22 | 0.47 | 0.75   | 0.86    | 1.03 | 1.98 | 6.15    | 15  | 27  | 35  |

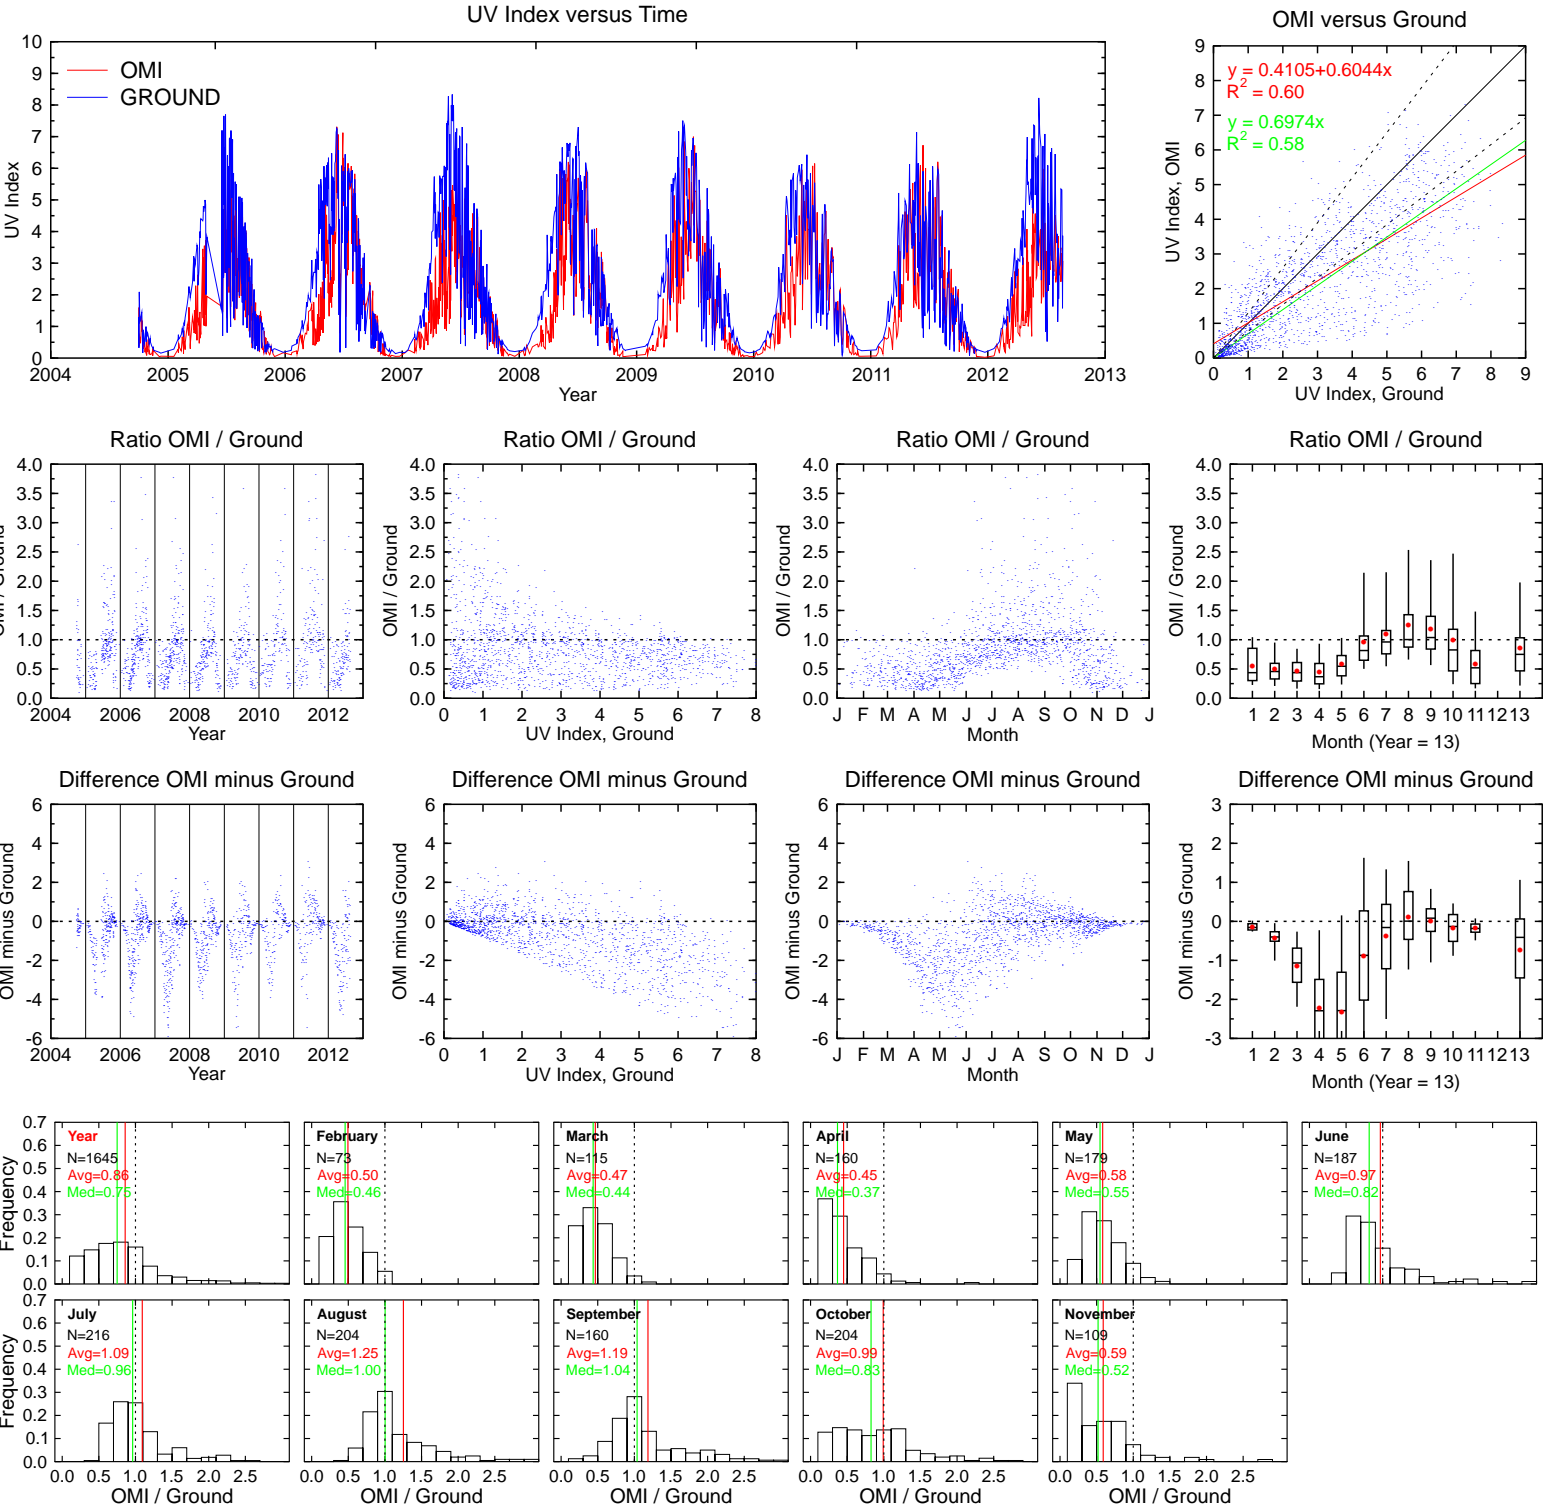

Supplement: Supplementary file 41 [file acp-15-7391-2015-supplement.zip]
