# Supplementary material for: Comparison of OMI UV observations with ground-based measurements at high northern latitudes
Source: Copernicus journal article supplement (doi:10.5194/acp-15-7391-2015), 2015-07-09

Alert, Canada (82.5°N, 62.32°E)  
CSEDDose, SZA less than 84, Dist less than 12 km

| Month     | N   | Minimum | 5%   | 25%  | Median | Average | 75%  | 95%  | Maximum | W10 | W20 | W30 |
|-----------|-----|---------|------|------|--------|---------|------|------|---------|-----|-----|-----|
| January   | 0   | 0.00    | 0.00 | 0.00 | 0.00   | 0.00    | 0.00 | 0.00 | 0.00    | 0   | 0   | 0   |
| February  | 0   | 0.00    | 0.00 | 0.00 | 0.00   | 0.00    | 0.00 | 0.00 | 0.00    | 0   | 0   | 0   |
| March     | 42  | 0.85    | 0.90 | 0.97 | 1.00   | 1.01    | 1.06 | 1.14 | 1.20    | 81  | 100 | 100 |
| April     | 74  | 0.91    | 0.95 | 1.00 | 1.04   | 1.06    | 1.12 | 1.19 | 1.36    | 70  | 96  | 99  |
| May       | 43  | 0.96    | 0.97 | 1.01 | 1.04   | 1.05    | 1.07 | 1.18 | 1.40    | 88  | 95  | 98  |
| June      | 86  | 0.91    | 0.93 | 1.07 | 1.21   | 1.29    | 1.40 | 2.18 | 2.61    | 31  | 49  | 65  |
| July      | 97  | 0.91    | 1.06 | 1.18 | 1.35   | 1.63    | 1.79 | 3.49 | 4.51    | 16  | 29  | 43  |
| August    | 72  | 0.80    | 0.86 | 1.05 | 1.32   | 1.55    | 1.80 | 3.03 | 3.86    | 21  | 40  | 49  |
| September | 33  | 0.86    | 0.87 | 0.99 | 1.12   | 1.20    | 1.19 | 2.03 | 2.37    | 36  | 76  | 79  |
| October   | 0   | 0.00    | 0.00 | 0.00 | 0.00   | 0.00    | 0.00 | 0.00 | 0.00    | 0   | 0   | 0   |
| November  | 0   | 0.00    | 0.00 | 0.00 | 0.00   | 0.00    | 0.00 | 0.00 | 0.00    | 0   | 0   | 0   |
| December  | 0   | 0.00    | 0.00 | 0.00 | 0.00   | 0.00    | 0.00 | 0.00 | 0.00    | 0   | 0   | 0   |
| Year      | 447 | 0.80    | 0.93 | 1.02 | 1.12   | 1.31    | 1.36 | 2.45 | 4.51    | 43  | 62  | 71  |

Erythemal Dose [kJ/m<sup>2</sup>] versus Time

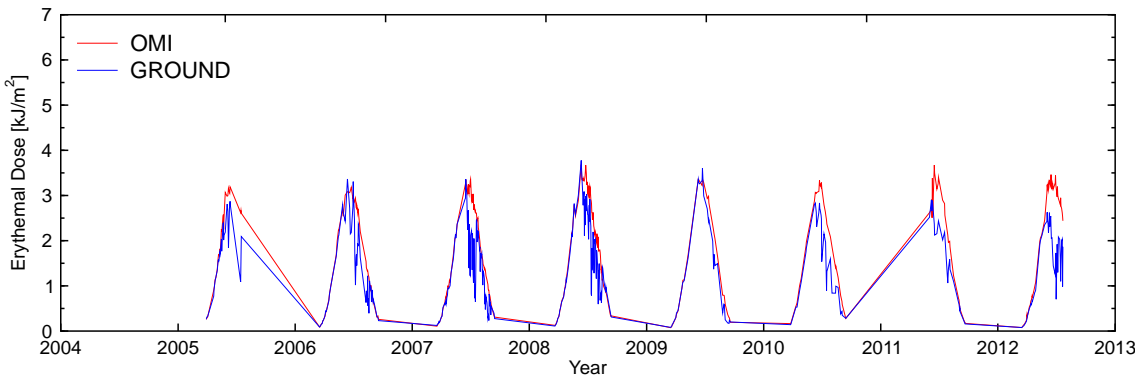

OMI versus Ground

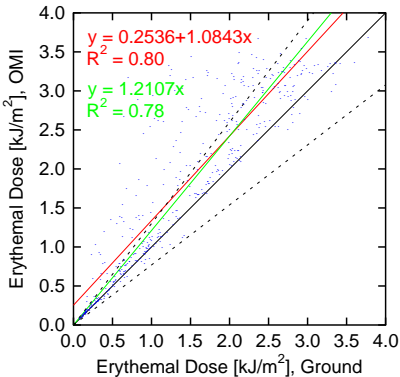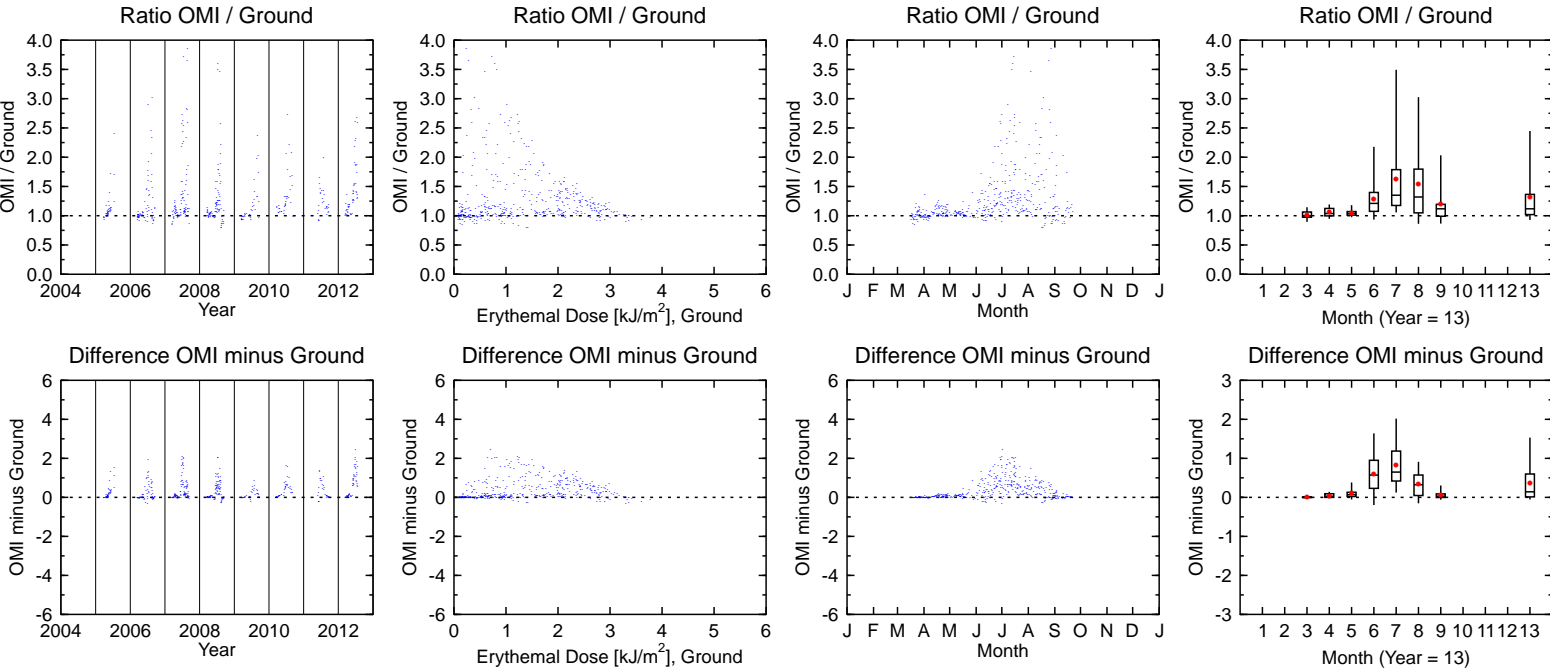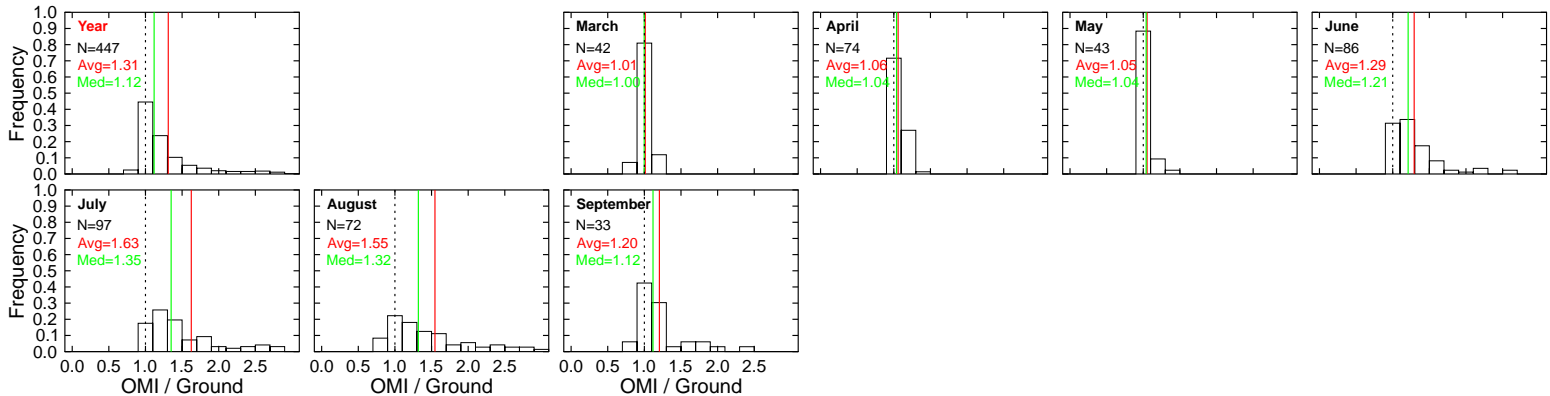

Supplement: Supplementary file 43 [file acp-15-7391-2015-supplement.zip]
