# Supplementary material for: Comparison of OMI UV observations with ground-based measurements at high northern latitudes
Source: Copernicus journal article supplement (doi:10.5194/acp-15-7391-2015), 2015-07-09

Trondheim, Norway (63.42°N, 10.4°E)

OPEDRate, SZA less than 84, Dist less than 12 km

| Month     | N    | Minimum | 5%   | 25%  | Median | Average | 75%  | 95%  | Maximum | W10 | W20 | W30 |
|-----------|------|---------|------|------|--------|---------|------|------|---------|-----|-----|-----|
| January   | 56   | 1.15    | 1.18 | 1.37 | 1.63   | 1.98    | 2.28 | 4.52 | 6.36    | 0   | 9   | 21  |
| February  | 192  | 1.15    | 1.23 | 1.35 | 1.49   | 1.70    | 1.82 | 2.76 | 5.86    | 0   | 3   | 17  |
| March     | 208  | 1.03    | 1.23 | 1.38 | 1.59   | 1.91    | 1.94 | 3.84 | 12.36   | 0.  | 3   | 11  |
| April     | 223  | 1.04    | 1.25 | 1.39 | 1.72   | 2.00    | 2.37 | 3.54 | 7.28    | 0.  | 2   | 9   |
| May       | 214  | 0.00    | 1.07 | 1.25 | 1.52   | 1.69    | 1.92 | 3.34 | 5.34    | 4   | 13  | 29  |
| June      | 229  | 0.72    | 0.88 | 1.12 | 1.25   | 1.41    | 1.47 | 2.34 | 8.14    | 16  | 38  | 56  |
| July      | 256  | 0.63    | 0.80 | 1.06 | 1.14   | 1.29    | 1.42 | 2.08 | 5.05    | 30  | 52  | 67  |
| August    | 229  | 0.48    | 0.85 | 1.03 | 1.11   | 1.24    | 1.31 | 2.03 | 4.57    | 34  | 62  | 72  |
| September | 213  | 0.53    | 0.77 | 1.03 | 1.15   | 1.23    | 1.31 | 2.00 | 3.52    | 26  | 53  | 69  |
| October   | 243  | 0.66    | 0.88 | 1.08 | 1.22   | 1.32    | 1.37 | 2.16 | 4.31    | 21  | 43  | 66  |
| November  | 112  | 0.82    | 1.10 | 1.23 | 1.42   | 1.71    | 1.75 | 3.18 | 8.92    | 4   | 17  | 34  |
| December  | 0    | 0.00    | 0.00 | 0.00 | 0.00   | 0.00    | 0.00 | 0.00 | 0.00    | 0   | 0   | 0   |
| Year      | 2175 | 0.00    | 0.90 | 1.14 | 1.34   | 1.54    | 1.70 | 2.78 | 12.36   | 14  | 30  | 44  |

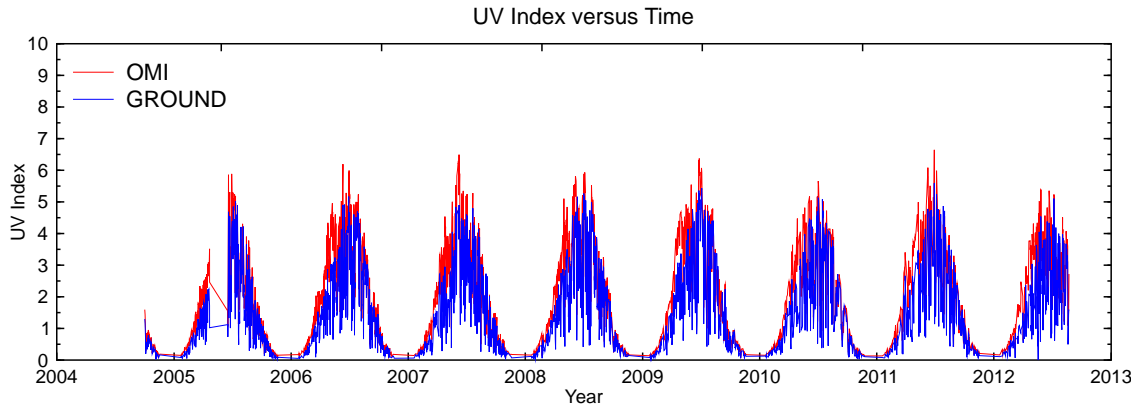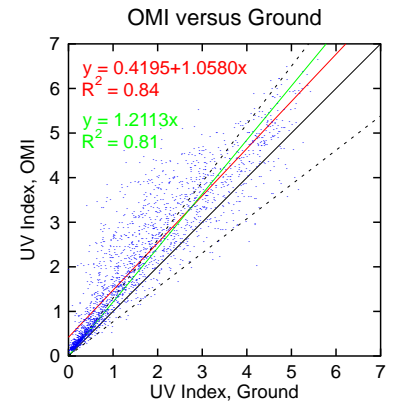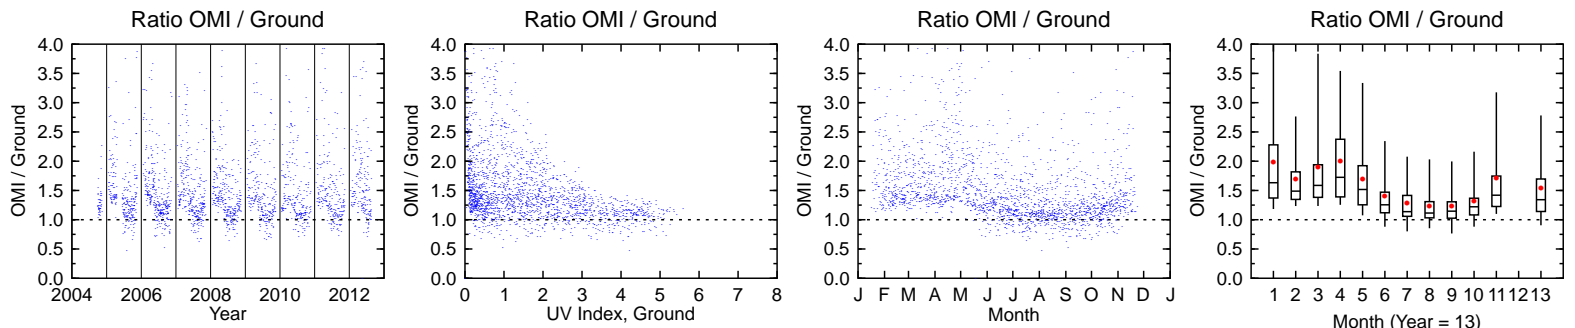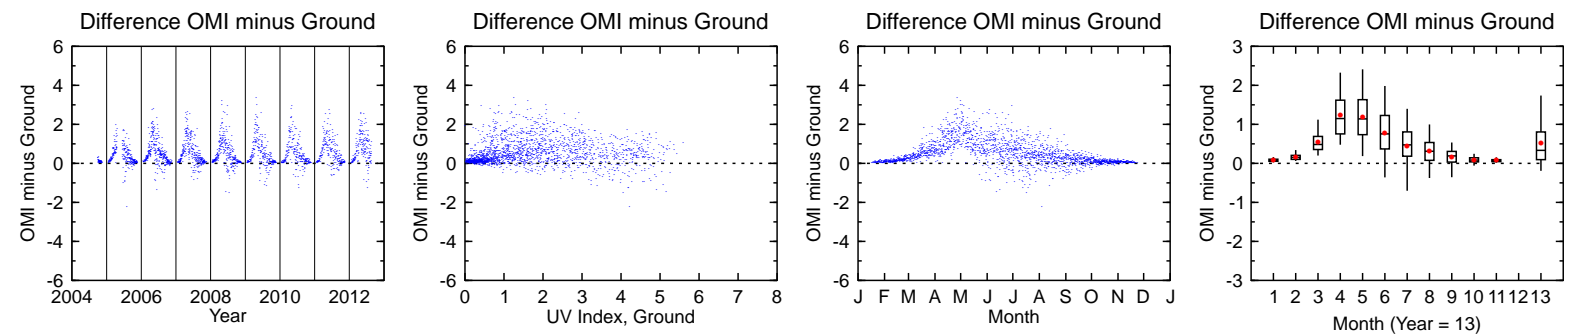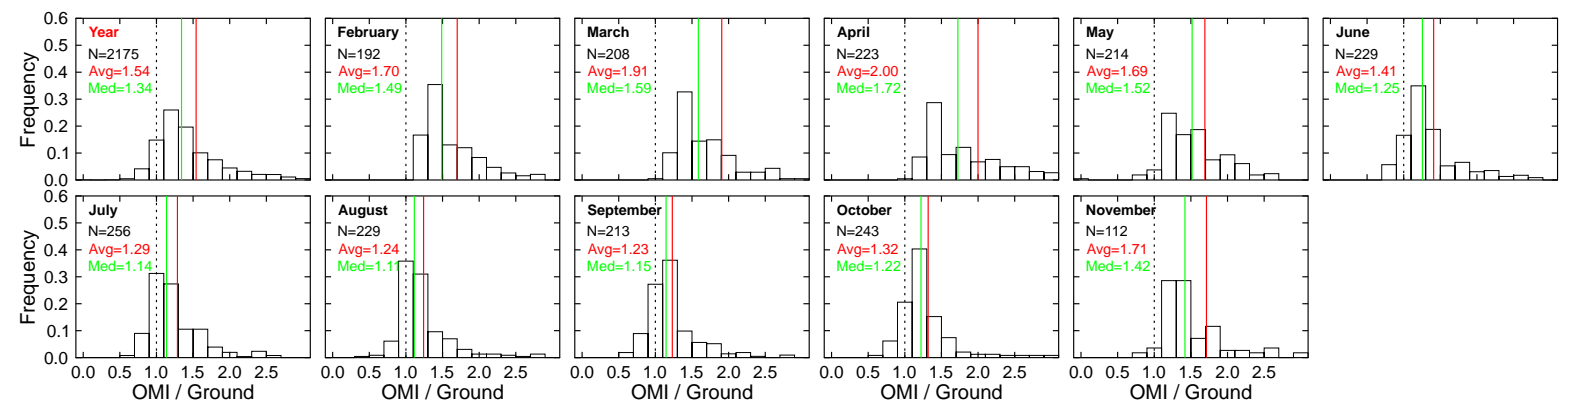

Supplement: Supplementary file 46 [file acp-15-7391-2015-supplement.zip]
