# Supplementary material for: Comparison of OMI UV observations with ground-based measurements at high northern latitudes
Source: Copernicus journal article supplement (doi:10.5194/acp-15-7391-2015), 2015-07-09

Andoya, Norway (69.28°N, 16.01°E)  
CSEDDose, SZA less than 84, Dist less than 12 km

| Month     | N    | Minimum | 5%   | 25%  | Median | Average | 75%  | 95%   | Maximum | W10 | W20 | W30 |
|-----------|------|---------|------|------|--------|---------|------|-------|---------|-----|-----|-----|
| January   | 0    | 0.00    | 0.00 | 0.00 | 0.00   | 0.00    | 0.00 | 0.00  | 0.00    | 0   | 0   | 0   |
| February  | 96   | 0.85    | 0.91 | 1.06 | 1.22   | 1.48    | 1.56 | 2.55  | 9.35    | 29  | 48  | 61  |
| March     | 186  | 0.92    | 0.96 | 1.07 | 1.25   | 1.42    | 1.48 | 2.43  | 6.12    | 33  | 43  | 58  |
| April     | 172  | 0.97    | 1.02 | 1.17 | 1.43   | 1.68    | 1.81 | 2.89  | 11.02   | 18  | 31  | 38  |
| May       | 166  | 1.02    | 1.12 | 1.29 | 1.77   | 2.28    | 2.59 | 5.75  | 9.87    | 4   | 16  | 26  |
| June      | 158  | 1.08    | 1.12 | 1.37 | 1.92   | 2.40    | 3.05 | 5.73  | 9.36    | 3   | 15  | 23  |
| July      | 181  | 1.03    | 1.10 | 1.43 | 1.94   | 2.52    | 2.89 | 5.32  | 14.94   | 5   | 10  | 15  |
| August    | 175  | 1.06    | 1.12 | 1.34 | 1.75   | 2.15    | 2.49 | 4.51  | 10.04   | 3   | 15  | 22  |
| September | 165  | 1.08    | 1.15 | 1.51 | 1.91   | 2.53    | 2.77 | 6.53  | 15.47   | 1   | 8   | 14  |
| October   | 182  | 0.81    | 1.02 | 1.29 | 1.81   | 2.29    | 2.66 | 5.85  | 9.14    | 14  | 20  | 25  |
| November  | 5    | 0.99    | 0.99 | 1.37 | 1.64   | 3.57    | 2.31 | 11.54 | 11.54   | 20  | 20  | 20  |
| December  | 0    | 0.00    | 0.00 | 0.00 | 0.00   | 0.00    | 0.00 | 0.00  | 0.00    | 0   | 0   | 0   |
| Year      | 1486 | 0.81    | 1.03 | 1.24 | 1.59   | 2.11    | 2.40 | 4.88  | 15.47   | 12  | 22  | 30  |

Erythemal Dose [kJ/m<sup>2</sup>] versus Time

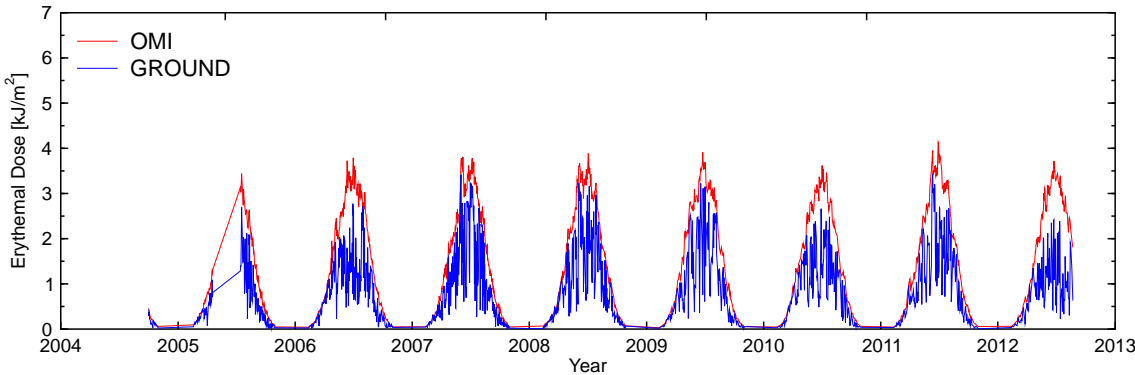

OMI versus Ground

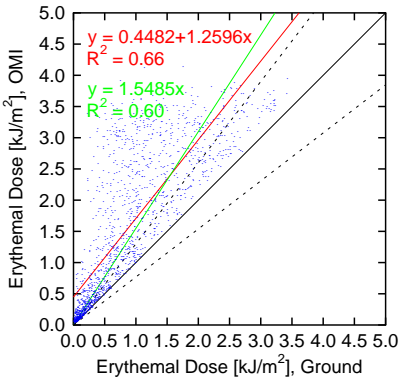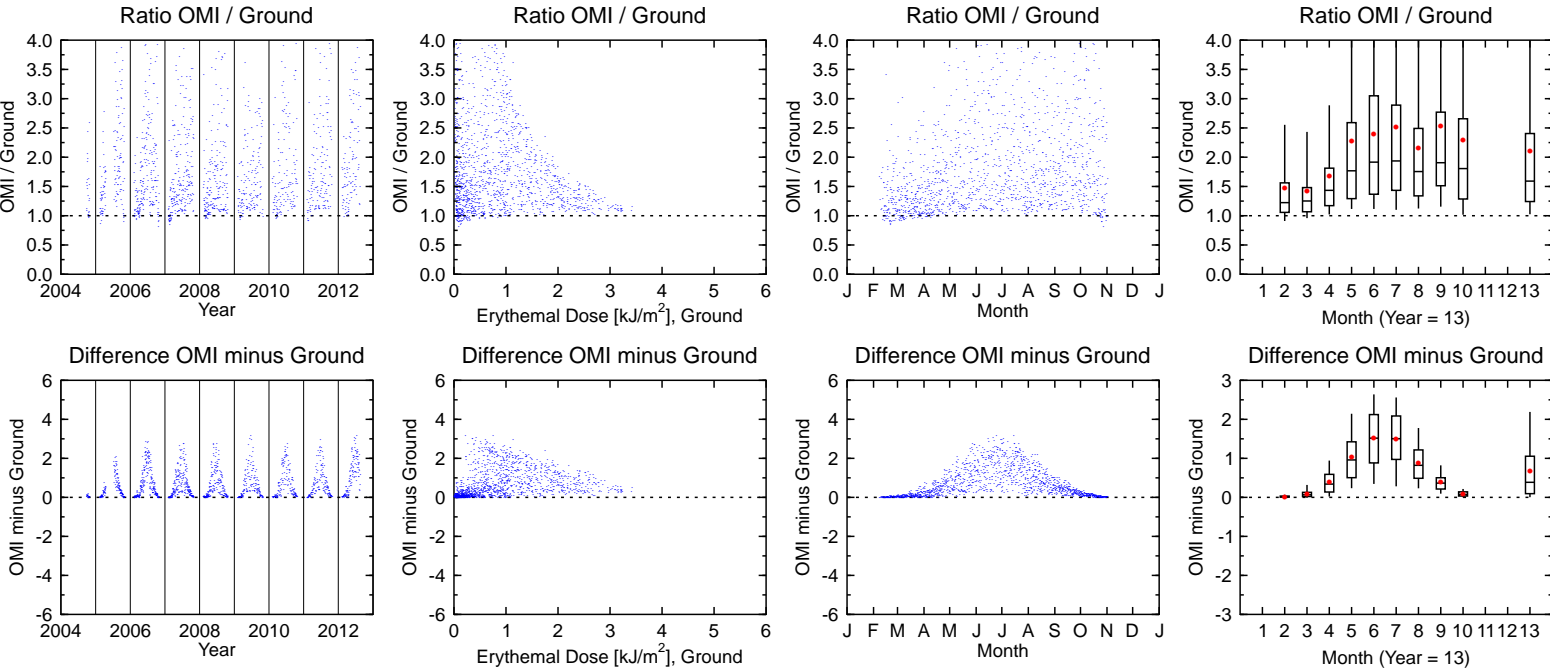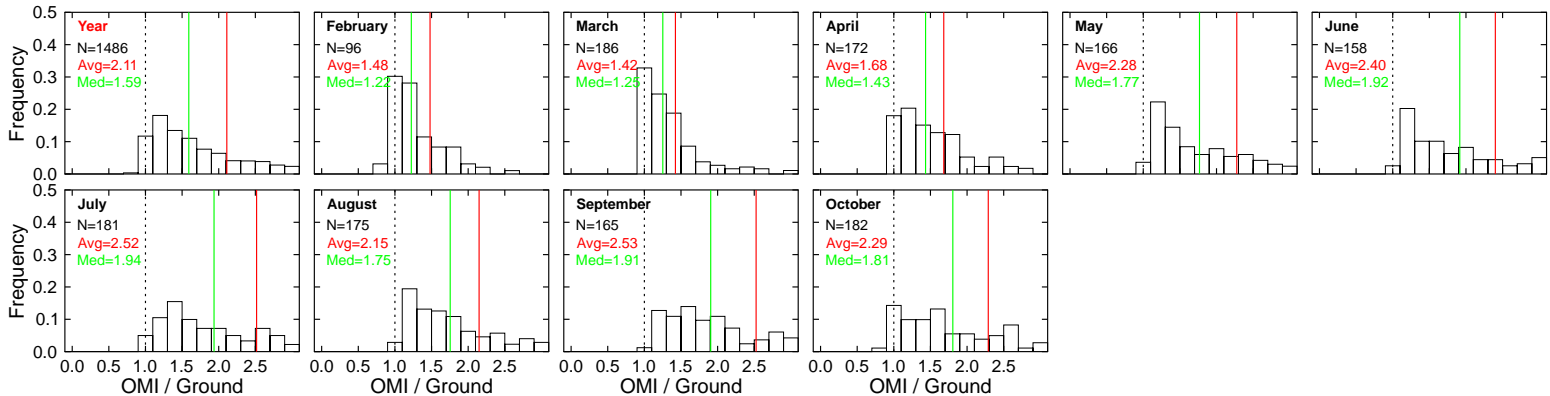

Supplement: Supplementary file 48 [file acp-15-7391-2015-supplement.zip]
