# Supplementary material for: Comparison of OMI UV observations with ground-based measurements at high northern latitudes
Source: Copernicus journal article supplement (doi:10.5194/acp-15-7391-2015), 2015-07-09
Supplement: Supplementary file 49 [file acp-15-7391-2015-supplement.zip]

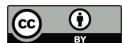

*Supplement of*

## **Comparison of OMI UV observations with ground-based measurements at high northern latitudes**

**G. Bernhard et al.**

*Correspondence to:* G. Bernhard (bernhard@biospherical.com)

- [acp-15-7391-2015-supplement-cover-letter.pdf](#)
- [CSEDDose\\_SZA\\_less\\_than\\_84\\_Dis\\_less\\_than\\_12.zip](#)
- [CSEDRate\\_SZA\\_less\\_than\\_84\\_Dis\\_less\\_than\\_12.zip](#)
- [EDDose.zip](#)
- [EDDose\\_SZA\\_less\\_than\\_84\\_Dis\\_less\\_than\\_12.zip](#)
- [EDRate\\_SZA\\_less\\_than\\_84\\_Dis\\_less\\_than\\_12.zip](#)
- [OPEDRate\\_SZA\\_less\\_than\\_84\\_Dis\\_less\\_than\\_12.zip](#)
- [Readme.pdf](#)
- [Validation\\_statistics\\_overpass.pdf](#)

The copyright of individual parts of the supplement might differ from the CC-BY 3.0 licence.
