# Supplementary material for: Comparison of OMI UV observations with ground-based measurements at high northern latitudes
Source: Copernicus journal article supplement (doi:10.5194/acp-15-7391-2015), 2015-07-09

Ny-Alesund, Svalbard (78.92°N, 11.92°E)  
CSEDDose, SZA less than 84, Dist less than 12 km

| Month     | N    | Minimum | 5%   | 25%  | Median | Average | 75%  | 95%  | Maximum | W10 | W20 | W30 |
|-----------|------|---------|------|------|--------|---------|------|------|---------|-----|-----|-----|
| January   | 0    | 0.00    | 0.00 | 0.00 | 0.00   | 0.00    | 0.00 | 0.00 | 0.00    | 0   | 0   | 0   |
| February  | 0    | 0.00    | 0.00 | 0.00 | 0.00   | 0.00    | 0.00 | 0.00 | 0.00    | 0   | 0   | 0   |
| March     | 138  | 0.78    | 0.87 | 0.95 | 1.04   | 1.09    | 1.17 | 1.54 | 2.01    | 47  | 78  | 88  |
| April     | 213  | 0.83    | 0.86 | 0.98 | 1.07   | 1.14    | 1.24 | 1.54 | 3.39    | 48  | 70  | 82  |
| May       | 201  | 0.86    | 0.95 | 1.04 | 1.17   | 1.28    | 1.39 | 1.84 | 3.65    | 35  | 54  | 64  |
| June      | 188  | 0.93    | 1.03 | 1.14 | 1.32   | 1.47    | 1.62 | 2.49 | 3.24    | 14  | 35  | 47  |
| July      | 204  | 1.08    | 1.17 | 1.40 | 1.78   | 1.94    | 2.32 | 3.31 | 5.33    | 0.  | 9   | 18  |
| August    | 196  | 1.06    | 1.16 | 1.45 | 1.83   | 1.99    | 2.33 | 3.34 | 4.87    | 1   | 11  | 17  |
| September | 184  | 0.93    | 1.07 | 1.19 | 1.50   | 1.68    | 1.93 | 3.11 | 4.31    | 9   | 27  | 36  |
| October   | 17   | 0.95    | 0.95 | 1.10 | 1.18   | 1.48    | 1.53 | 4.34 | 4.34    | 24  | 53  | 65  |
| November  | 0    | 0.00    | 0.00 | 0.00 | 0.00   | 0.00    | 0.00 | 0.00 | 0.00    | 0   | 0   | 0   |
| December  | 0    | 0.00    | 0.00 | 0.00 | 0.00   | 0.00    | 0.00 | 0.00 | 0.00    | 0   | 0   | 0   |
| Year      | 1341 | 0.78    | 0.94 | 1.10 | 1.31   | 1.53    | 1.76 | 2.85 | 5.33    | 21  | 39  | 49  |

Erythemal Dose [kJ/m<sup>2</sup>] versus Time

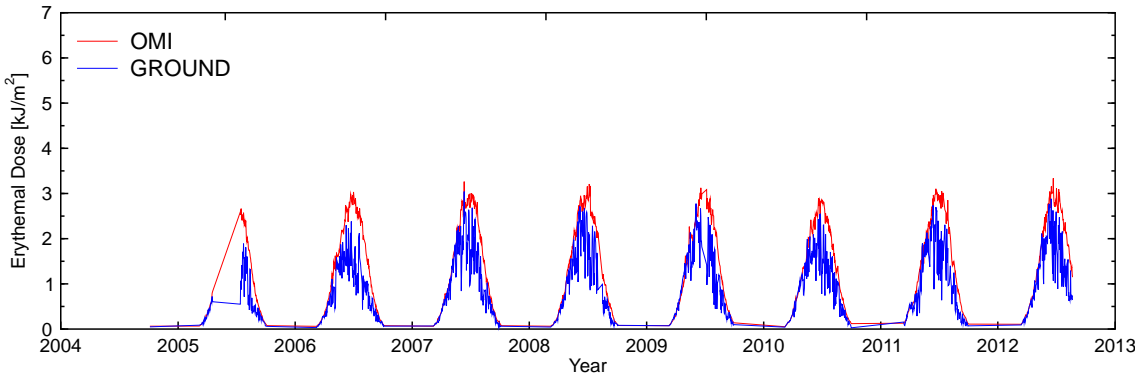

OMI versus Ground

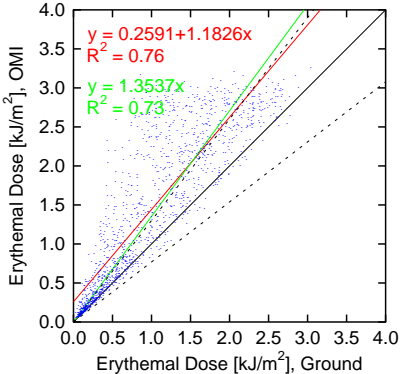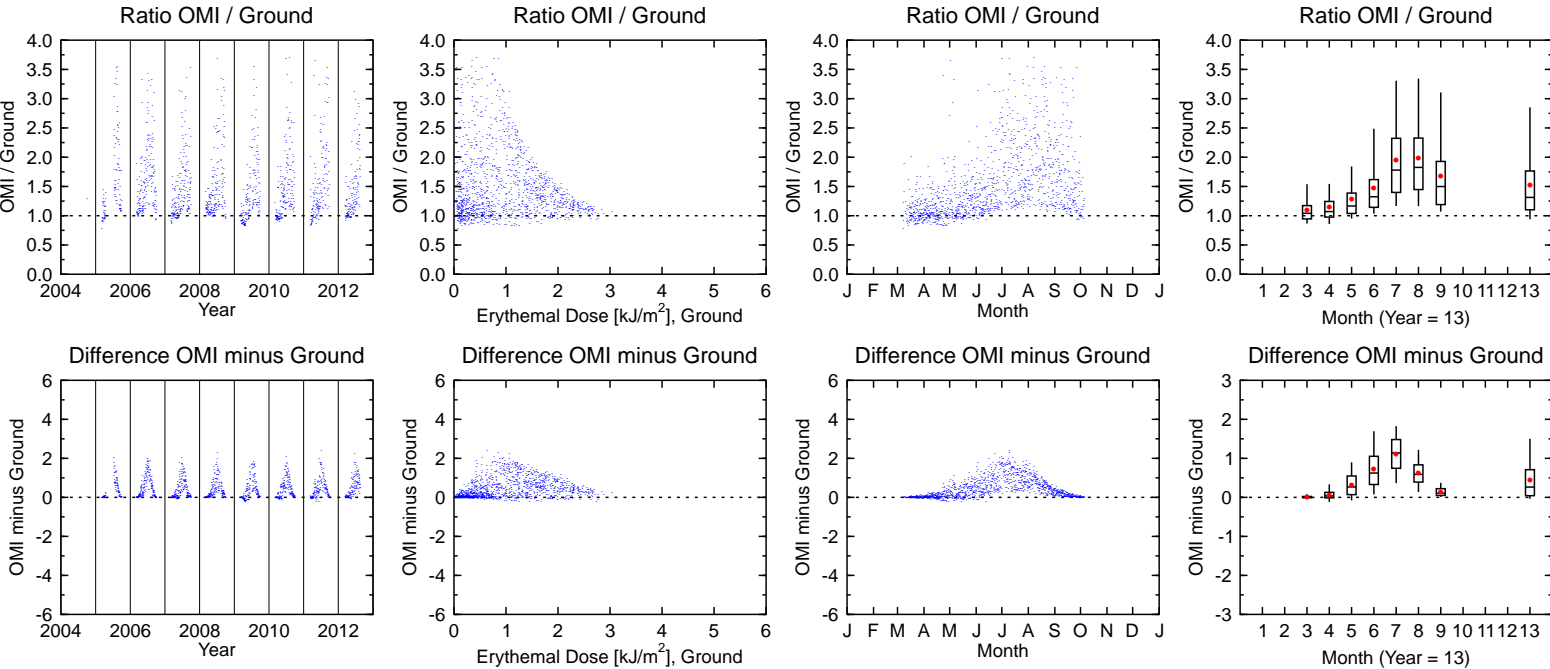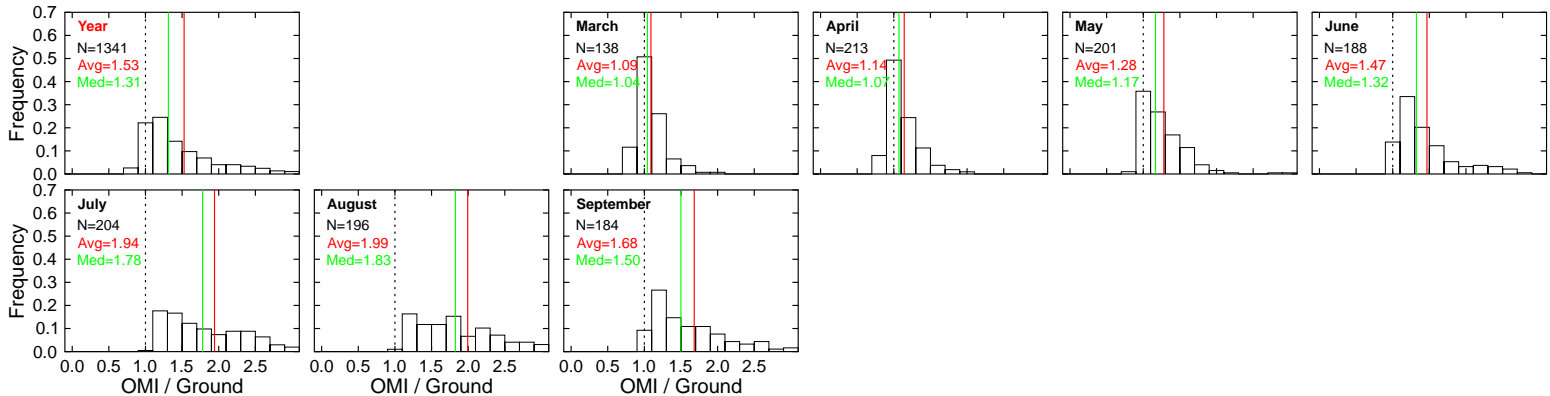

Supplement: Supplementary file 50 [file acp-15-7391-2015-supplement.zip]
