# Supplementary material for: Comparison of OMI UV observations with ground-based measurements at high northern latitudes
Source: Copernicus journal article supplement (doi:10.5194/acp-15-7391-2015), 2015-07-09

Finse, Norway (60.60°N, 7.52°E)  
EDDose, SZA less than 84, Dist less than 12 km

| Month     | N    | Minimum | 5%   | 25%  | Median | Average | 75%  | 95%  | Maximum | W10 | W20 | W30 |
|-----------|------|---------|------|------|--------|---------|------|------|---------|-----|-----|-----|
| January   | 24   | 0.18    | 0.23 | 0.31 | 0.48   | 0.57    | 0.88 | 1.02 | 1.15    | 17  | 33  | 33  |
| February  | 66   | 0.15    | 0.22 | 0.33 | 0.46   | 0.50    | 0.63 | 0.93 | 1.01    | 6   | 11  | 15  |
| March     | 104  | 0.14    | 0.19 | 0.29 | 0.47   | 0.47    | 0.62 | 0.82 | 0.97    | 2   | 5   | 11  |
| April     | 139  | 0.13    | 0.16 | 0.26 | 0.39   | 0.45    | 0.59 | 0.95 | 1.26    | 6   | 6   | 9   |
| May       | 144  | 0.13    | 0.25 | 0.38 | 0.55   | 0.56    | 0.68 | 0.95 | 1.67    | 7   | 13  | 15  |
| June      | 145  | 0.45    | 0.53 | 0.65 | 0.74   | 0.82    | 0.93 | 1.26 | 2.09    | 14  | 30  | 40  |
| July      | 159  | 0.45    | 0.69 | 0.83 | 0.97   | 1.00    | 1.13 | 1.49 | 2.13    | 37  | 60  | 72  |
| August    | 152  | 0.53    | 0.74 | 0.90 | 1.01   | 1.06    | 1.15 | 1.58 | 2.67    | 43  | 65  | 79  |
| September | 124  | 0.23    | 0.56 | 0.89 | 1.02   | 1.02    | 1.15 | 1.44 | 2.08    | 35  | 62  | 74  |
| October   | 156  | 0.10    | 0.23 | 0.46 | 0.78   | 0.87    | 1.13 | 2.03 | 3.38    | 11  | 28  | 38  |
| November  | 95   | 0.11    | 0.18 | 0.26 | 0.47   | 0.59    | 0.79 | 1.49 | 1.85    | 8   | 15  | 21  |
| December  | 13   | 0.16    | 0.16 | 0.26 | 0.36   | 0.39    | 0.41 | 1.09 | 1.09    | 8   | 8   | 8   |
| Year      | 1321 | 0.10    | 0.22 | 0.46 | 0.73   | 0.76    | 1.00 | 1.36 | 3.38    | 18  | 32  | 40  |

Erythemal Dose [kJ/m<sup>2</sup>] versus Time

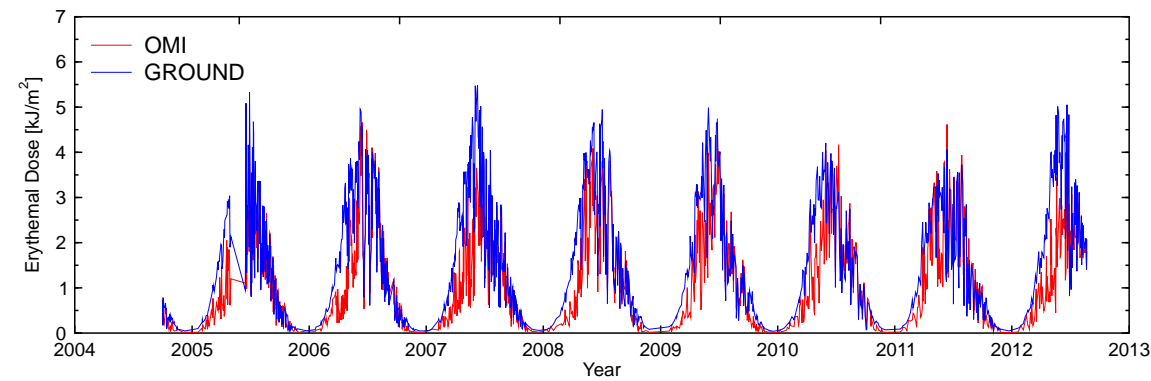

OMI versus Ground

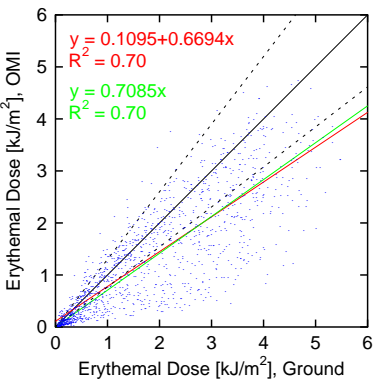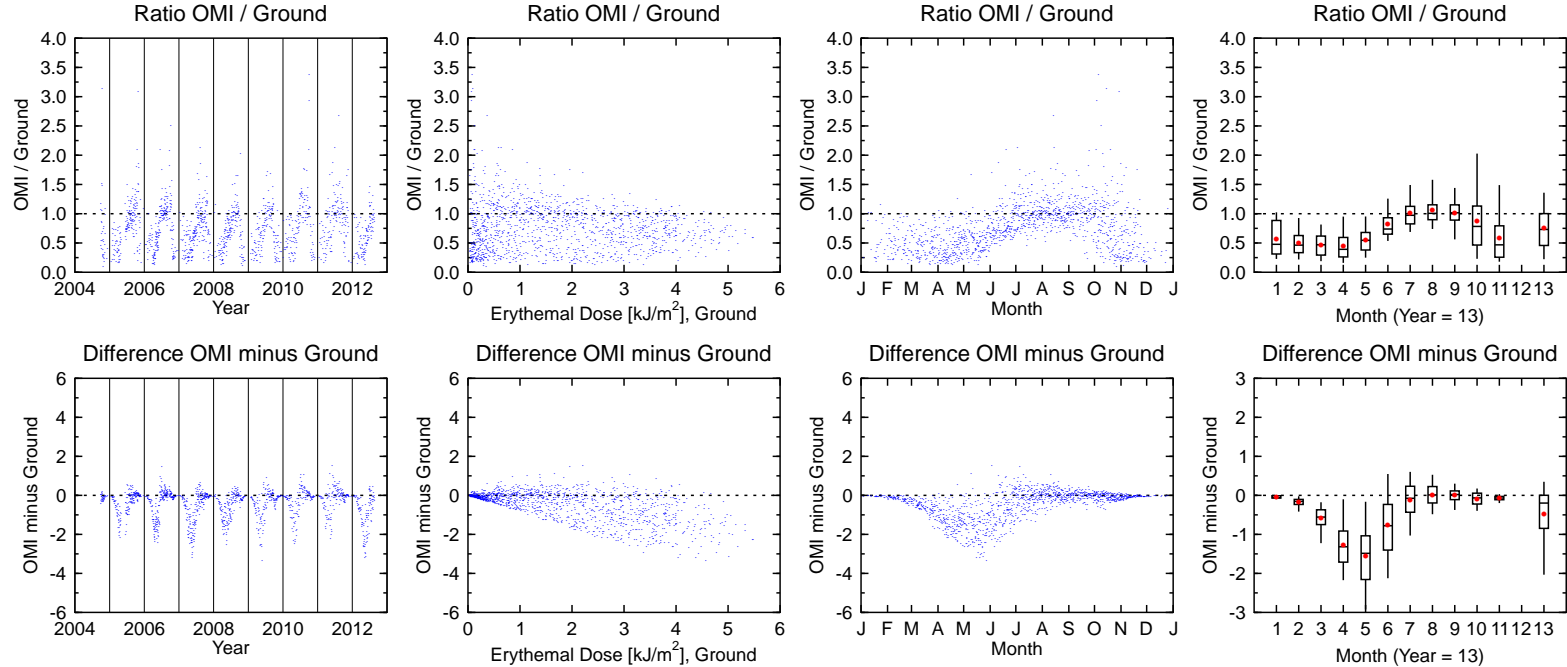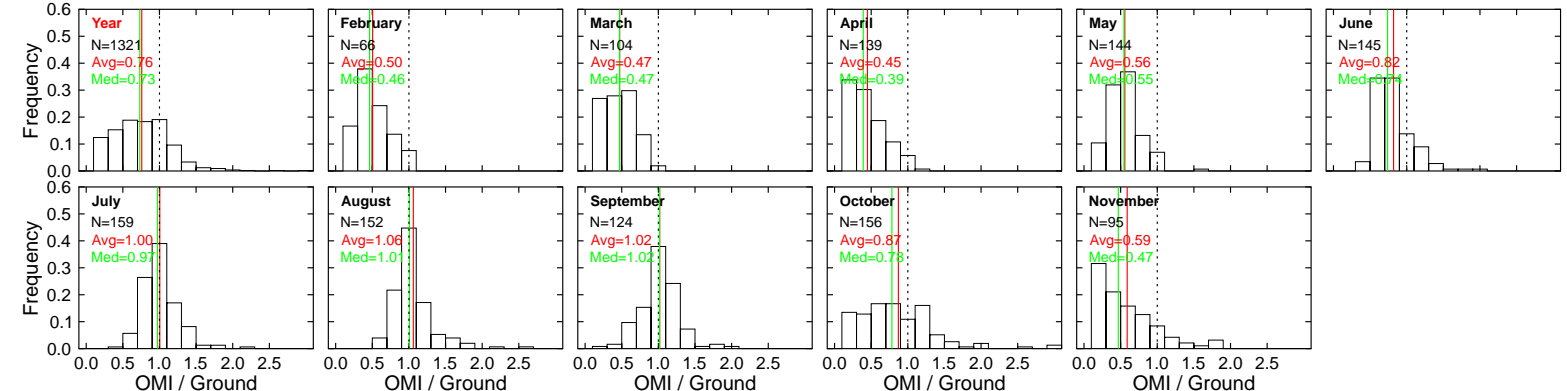

Supplement: Supplementary file 51 [file acp-15-7391-2015-supplement.zip]
