# Supplementary material for: Comparison of OMI UV observations with ground-based measurements at high northern latitudes
Source: Copernicus journal article supplement (doi:10.5194/acp-15-7391-2015), 2015-07-09
Supplement: Supplementary file 52 [file acp-15-7391-2015-supplement.zip]

Eureka, Canada (79.99°N, 85.93°E)

CSEDRate (Ground at local solar noon), SZA less than 84, Dist less than 12 km

| Month     | N    | Minimum | 5%   | 25%  | Median | Average | 75%  | 95%  | Maximum | W10 | W20 | W30 |
|-----------|------|---------|------|------|--------|---------|------|------|---------|-----|-----|-----|
| January   | 0    | 0.00    | 0.00 | 0.00 | 0.00   | 0.00    | 0.00 | 0.00 | 0.00    | 0   | 0   | 0   |
| February  | 0    | 0.00    | 0.00 | 0.00 | 0.00   | 0.00    | 0.00 | 0.00 | 0.00    | 0   | 0   | 0   |
| March     | 71   | 1.01    | 1.01 | 1.06 | 1.11   | 1.13    | 1.16 | 1.22 | 2.18    | 39  | 89  | 99  |
| April     | 95   | 0.96    | 0.99 | 1.06 | 1.10   | 1.11    | 1.13 | 1.24 | 1.44    | 47  | 91  | 98  |
| May       | 219  | 0.58    | 1.01 | 1.08 | 1.13   | 1.18    | 1.20 | 1.60 | 2.70    | 32  | 74  | 86  |
| June      | 346  | 0.79    | 1.08 | 1.15 | 1.23   | 1.44    | 1.51 | 2.72 | 4.48    | 8   | 42  | 66  |
| July      | 439  | 1.05    | 1.08 | 1.14 | 1.27   | 1.56    | 1.69 | 2.86 | 8.07    | 11  | 44  | 51  |
| August    | 436  | 0.99    | 1.10 | 1.19 | 1.26   | 1.62    | 1.64 | 3.10 | 11.16   | 6   | 30  | 54  |
| September | 217  | 1.03    | 1.18 | 1.29 | 1.45   | 1.87    | 1.83 | 4.96 | 7.62    | 2   | 6   | 27  |
| October   | 0    | 0.00    | 0.00 | 0.00 | 0.00   | 0.00    | 0.00 | 0.00 | 0.00    | 0   | 0   | 0   |
| November  | 0    | 0.00    | 0.00 | 0.00 | 0.00   | 0.00    | 0.00 | 0.00 | 0.00    | 0   | 0   | 0   |
| December  | 0    | 0.00    | 0.00 | 0.00 | 0.00   | 0.00    | 0.00 | 0.00 | 0.00    | 0   | 0   | 0   |
| Year      | 1823 | 0.58    | 1.06 | 1.13 | 1.23   | 1.50    | 1.56 | 2.86 | 11.16   | 14  | 43  | 60  |

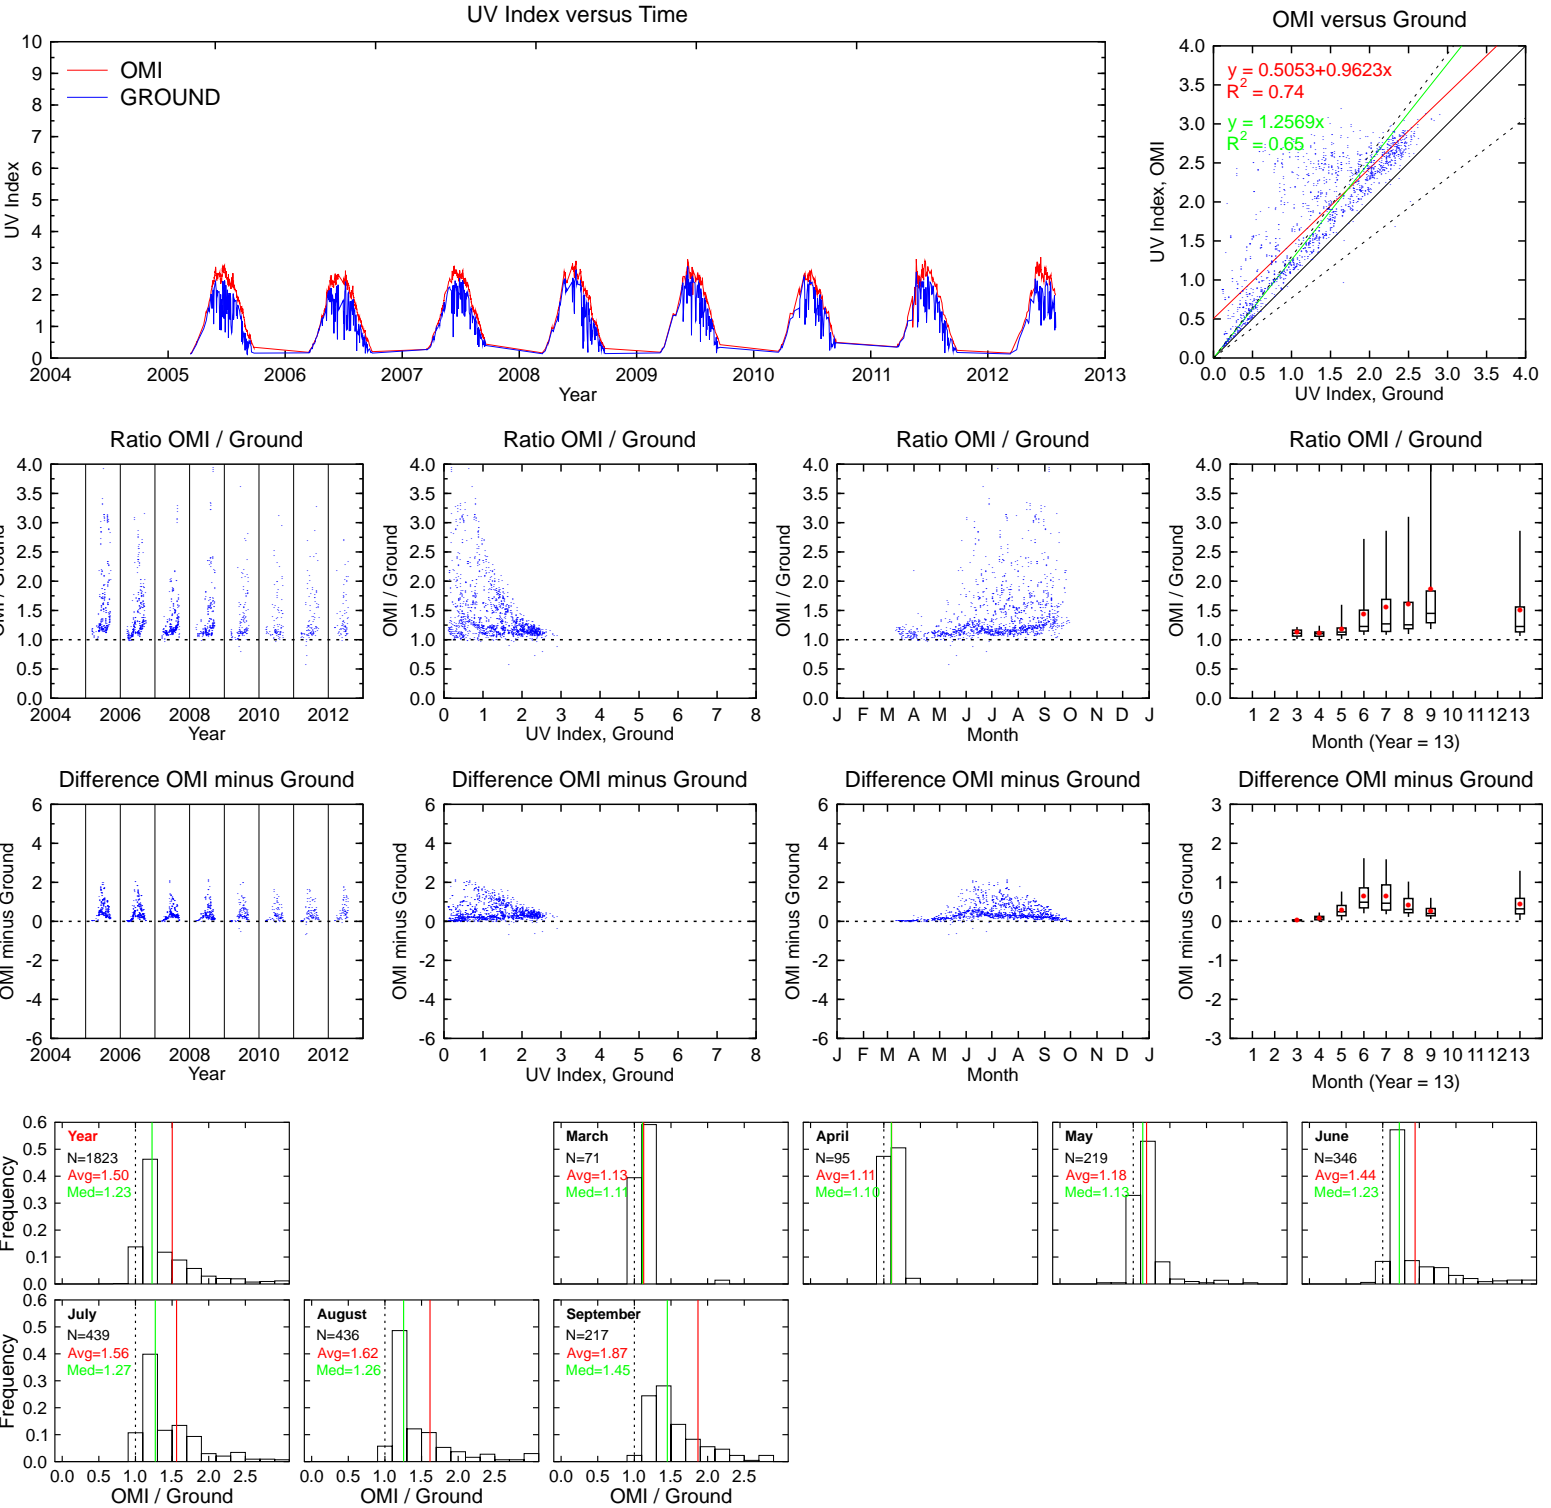

Ratio OMI / Ground

Frequency
