# Supplementary material for: Comparison of OMI UV observations with ground-based measurements at high northern latitudes
Source: Copernicus journal article supplement (doi:10.5194/acp-15-7391-2015), 2015-07-09

Alert, Canada (82.5°N, 62.32°E)

EDRate (Ground at local solar noon), SZA less than 84, Dist less than 12 km

| Month     | N    | Minimum | 5%   | 25%  | Median | Average | 75%  | 95%  | Maximum | W10 | W20 | W30 |
|-----------|------|---------|------|------|--------|---------|------|------|---------|-----|-----|-----|
| January   | 0    | 0.00    | 0.00 | 0.00 | 0.00   | 0.00    | 0.00 | 0.00 | 0.00    | 0   | 0   | 0   |
| February  | 0    | 0.00    | 0.00 | 0.00 | 0.00   | 0.00    | 0.00 | 0.00 | 0.00    | 0   | 0   | 0   |
| March     | 63   | 0.83    | 0.94 | 0.99 | 1.04   | 1.04    | 1.08 | 1.15 | 1.29    | 79  | 97  | 100 |
| April     | 132  | 0.88    | 0.92 | 0.97 | 0.99   | 1.02    | 1.06 | 1.18 | 1.39    | 81  | 95  | 98  |
| May       | 118  | 0.89    | 0.94 | 1.00 | 1.04   | 1.06    | 1.09 | 1.27 | 1.83    | 81  | 92  | 98  |
| June      | 175  | 0.45    | 0.81 | 1.03 | 1.14   | 1.21    | 1.33 | 1.95 | 3.06    | 35  | 58  | 67  |
| July      | 311  | 0.28    | 0.64 | 0.93 | 1.11   | 1.20    | 1.33 | 2.11 | 3.84    | 24  | 46  | 63  |
| August    | 265  | 0.13    | 0.24 | 0.66 | 1.00   | 1.00    | 1.25 | 1.92 | 2.49    | 18  | 35  | 46  |
| September | 44   | 0.22    | 0.25 | 0.41 | 0.54   | 0.74    | 1.10 | 1.56 | 2.00    | 9   | 18  | 25  |
| October   | 0    | 0.00    | 0.00 | 0.00 | 0.00   | 0.00    | 0.00 | 0.00 | 0.00    | 0   | 0   | 0   |
| November  | 0    | 0.00    | 0.00 | 0.00 | 0.00   | 0.00    | 0.00 | 0.00 | 0.00    | 0   | 0   | 0   |
| December  | 0    | 0.00    | 0.00 | 0.00 | 0.00   | 0.00    | 0.00 | 0.00 | 0.00    | 0   | 0   | 0   |
| Year      | 1108 | 0.13    | 0.43 | 0.95 | 1.05   | 1.09    | 1.21 | 1.81 | 3.84    | 40  | 58  | 68  |

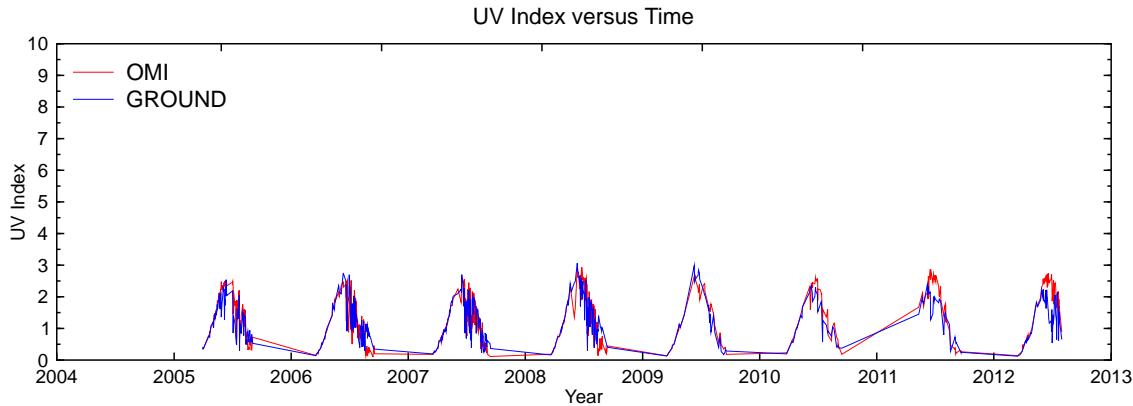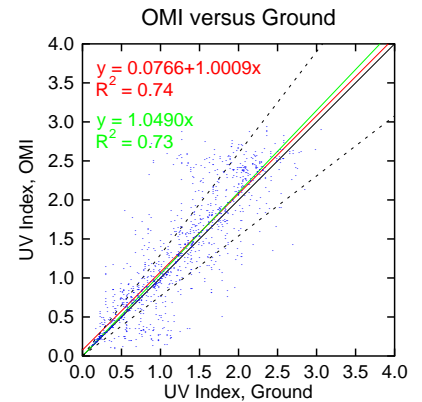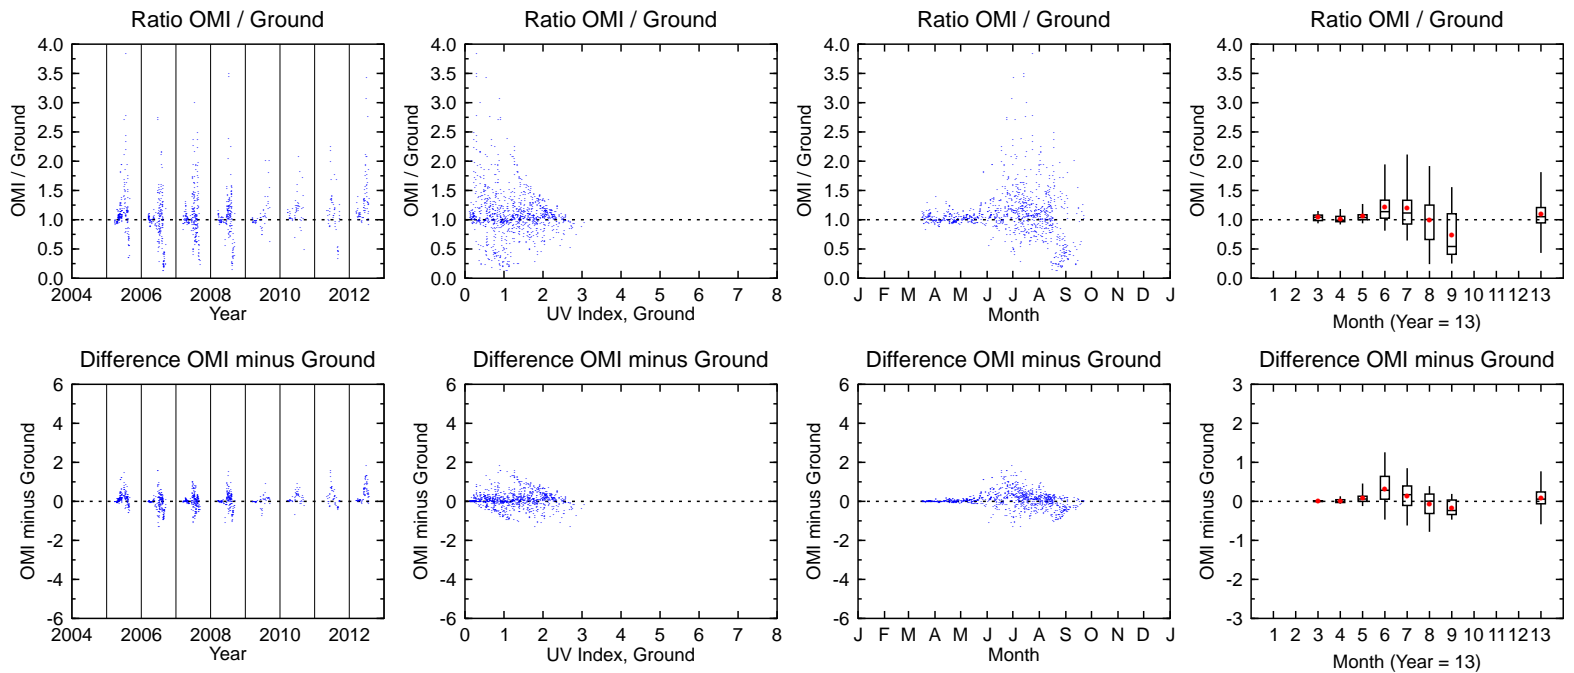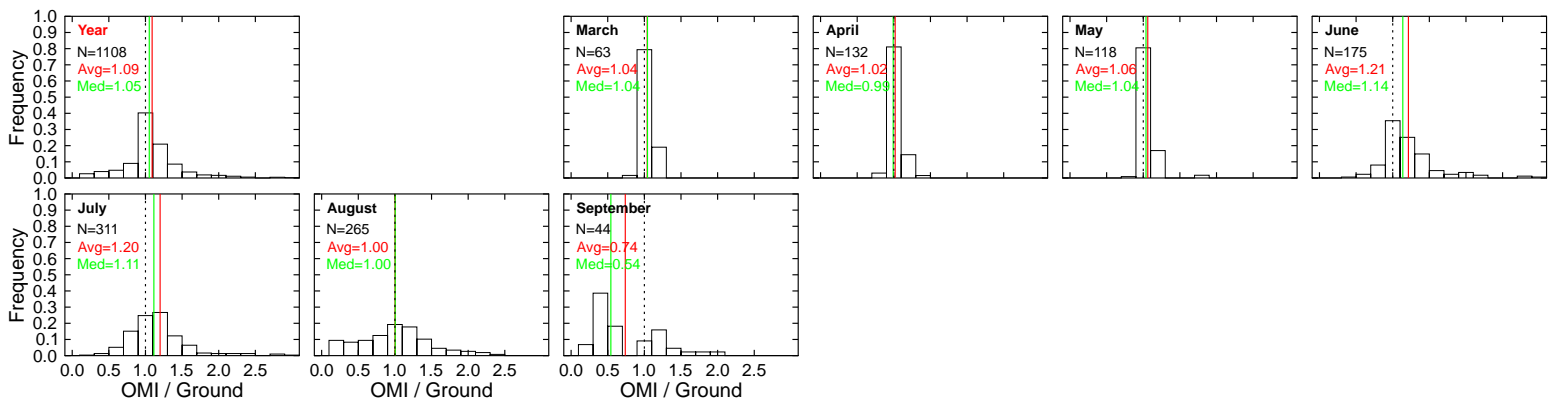

Supplement: Supplementary file 53 [file acp-15-7391-2015-supplement.zip]
