# Supplementary material for: Comparison of OMI UV observations with ground-based measurements at high northern latitudes
Source: Copernicus journal article supplement (doi:10.5194/acp-15-7391-2015), 2015-07-09

Barrow, Alaska (71.32°N, 156.68°E)

EDDose, all data

| Month     | N    | Minimum | 5%   | 25%  | Median | Average | 75%  | 95%  | Maximum | W10 | W20 | W30 |
|-----------|------|---------|------|------|--------|---------|------|------|---------|-----|-----|-----|
| January   | 0    | 0.00    | 0.00 | 0.00 | 0.00   | 0.00    | 0.00 | 0.00 | 0.00    | 0   | 0   | 0   |
| February  | 163  | 0.26    | 0.50 | 0.77 | 0.88   | 0.85    | 0.95 | 1.06 | 1.33    | 37  | 63  | 74  |
| March     | 157  | 0.63    | 0.83 | 0.93 | 0.97   | 0.98    | 1.02 | 1.14 | 1.38    | 76  | 92  | 97  |
| April     | 181  | 0.56    | 0.80 | 0.96 | 1.04   | 1.04    | 1.13 | 1.32 | 1.57    | 54  | 79  | 90  |
| May       | 196  | 0.69    | 0.83 | 1.04 | 1.14   | 1.15    | 1.26 | 1.46 | 1.99    | 30  | 58  | 79  |
| June      | 170  | 0.30    | 0.67 | 0.88 | 1.02   | 1.03    | 1.17 | 1.41 | 1.72    | 36  | 62  | 80  |
| July      | 202  | 0.72    | 0.86 | 1.00 | 1.11   | 1.13    | 1.20 | 1.42 | 3.09    | 37  | 73  | 86  |
| August    | 213  | 0.77    | 1.01 | 1.12 | 1.22   | 1.28    | 1.36 | 1.65 | 6.76    | 17  | 46  | 66  |
| September | 214  | 0.93    | 1.11 | 1.28 | 1.43   | 1.47    | 1.60 | 2.01 | 2.95    | 5   | 17  | 29  |
| October   | 262  | 0.93    | 1.16 | 1.39 | 1.61   | 1.74    | 1.92 | 2.77 | 4.98    | 2   | 8   | 14  |
| November  | 29   | 0.12    | 0.36 | 0.86 | 1.32   | 1.24    | 1.55 | 2.52 | 2.63    | 10  | 24  | 28  |
| December  | 0    | 0.00    | 0.00 | 0.00 | 0.00   | 0.00    | 0.00 | 0.00 | 0.00    | 0   | 0   | 0   |
| Year      | 1787 | 0.12    | 0.78 | 0.98 | 1.14   | 1.22    | 1.37 | 1.92 | 6.76    | 29  | 51  | 64  |

Erythemal Dose [kJ/m<sup>2</sup>] versus Time

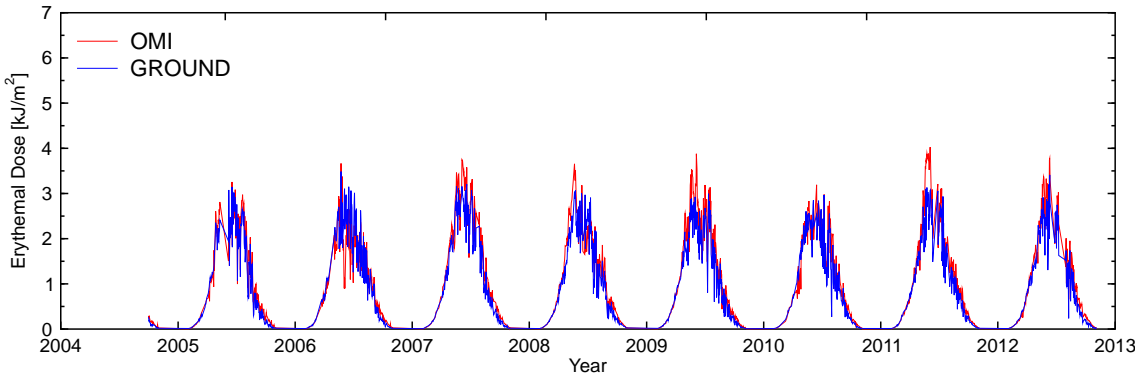

OMI versus Ground

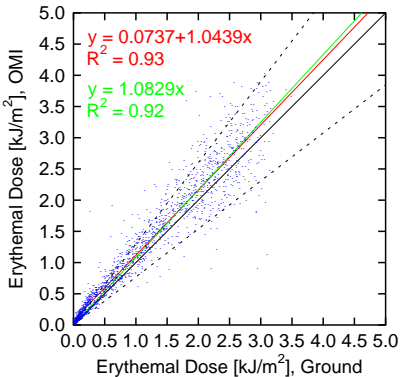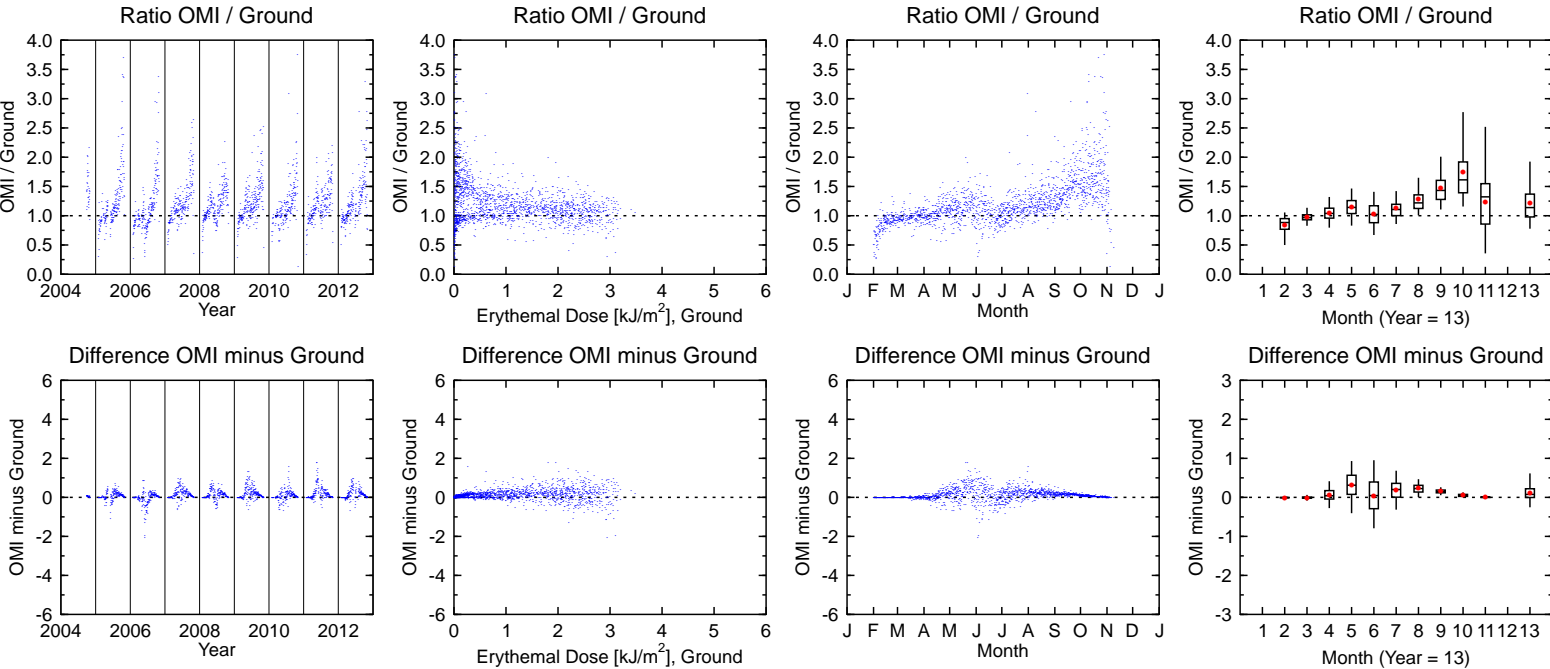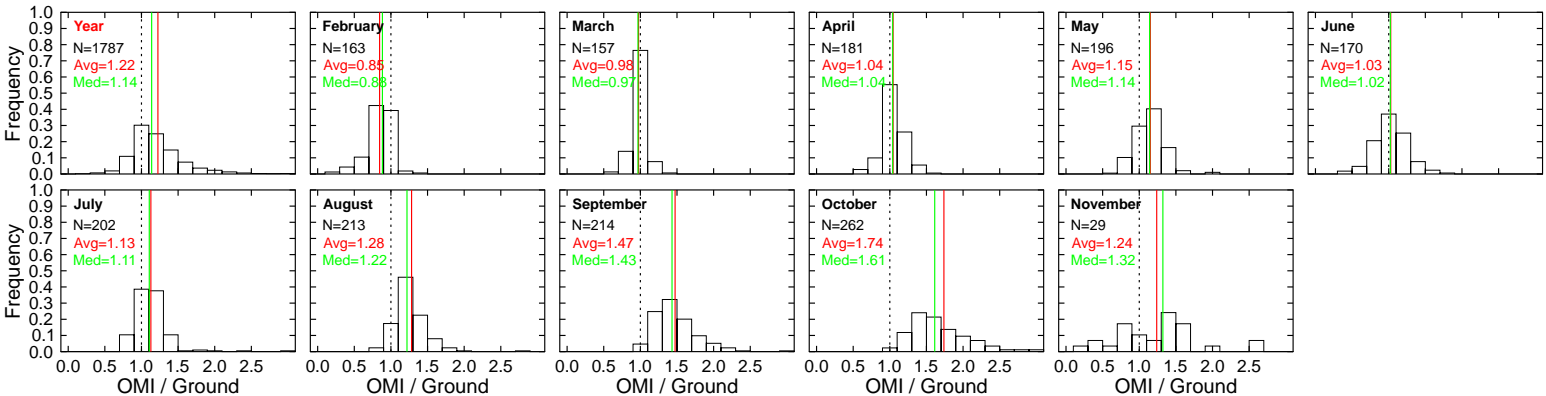

Supplement: Supplementary file 56 [file acp-15-7391-2015-supplement.zip]
