# Supplementary material for: Comparison of OMI UV observations with ground-based measurements at high northern latitudes
Source: Copernicus journal article supplement (doi:10.5194/acp-15-7391-2015), 2015-07-09

Resolute, Canada (74.72°N, 94.98°E)  
EDDose, SZA less than 84, Dist less than 12 km

| Month     | N   | Minimum | 5%   | 25%  | Median | Average | 75%  | 95%  | Maximum | W10 | W20 | W30 |
|-----------|-----|---------|------|------|--------|---------|------|------|---------|-----|-----|-----|
| January   | 0   | 0.00    | 0.00 | 0.00 | 0.00   | 0.00    | 0.00 | 0.00 | 0.00    | 0   | 0   | 0   |
| February  | 3   | 1.04    | 1.04 | 1.04 | 1.19   | 1.17    | 1.27 | 1.27 | 1.27    | 33  | 67  | 100 |
| March     | 61  | 0.97    | 1.01 | 1.05 | 1.09   | 1.10    | 1.14 | 1.20 | 1.41    | 61  | 93  | 98  |
| April     | 72  | 0.82    | 0.95 | 1.05 | 1.09   | 1.08    | 1.11 | 1.22 | 1.34    | 58  | 92  | 99  |
| May       | 55  | 0.78    | 0.86 | 1.06 | 1.13   | 1.16    | 1.25 | 1.42 | 1.97    | 25  | 65  | 85  |
| June      | 65  | 0.89    | 1.13 | 1.33 | 1.48   | 1.62    | 1.83 | 2.32 | 4.15    | 3   | 11  | 20  |
| July      | 62  | 0.74    | 1.16 | 1.23 | 1.29   | 1.30    | 1.36 | 1.53 | 1.62    | 2   | 10  | 53  |
| August    | 96  | 0.47    | 0.74 | 1.20 | 1.24   | 1.25    | 1.33 | 1.63 | 2.13    | 7   | 16  | 62  |
| September | 93  | 0.50    | 0.59 | 0.89 | 1.17   | 1.14    | 1.33 | 1.62 | 2.06    | 15  | 33  | 48  |
| October   | 30  | 0.72    | 0.72 | 0.85 | 0.92   | 0.96    | 1.10 | 1.28 | 1.47    | 27  | 63  | 87  |
| November  | 0   | 0.00    | 0.00 | 0.00 | 0.00   | 0.00    | 0.00 | 0.00 | 0.00    | 0   | 0   | 0   |
| December  | 0   | 0.00    | 0.00 | 0.00 | 0.00   | 0.00    | 0.00 | 0.00 | 0.00    | 0   | 0   | 0   |
| Year      | 537 | 0.47    | 0.78 | 1.05 | 1.19   | 1.22    | 1.32 | 1.73 | 4.15    | 23  | 45  | 67  |

Erythemal Dose [kJ/m<sup>2</sup>] versus Time

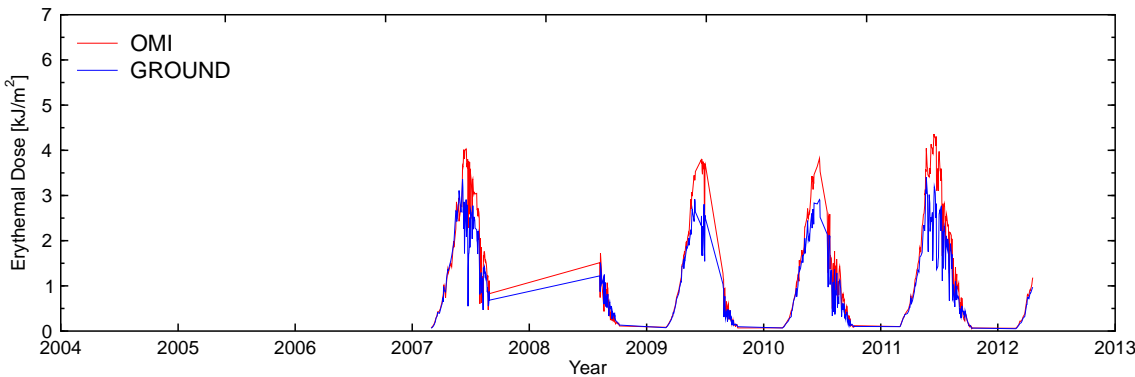

OMI versus Ground

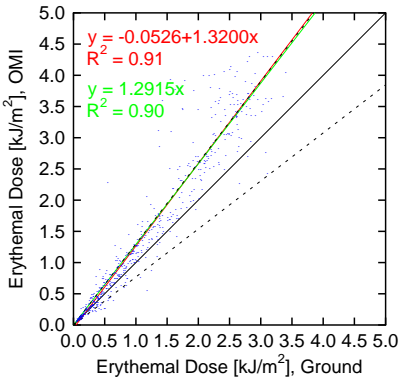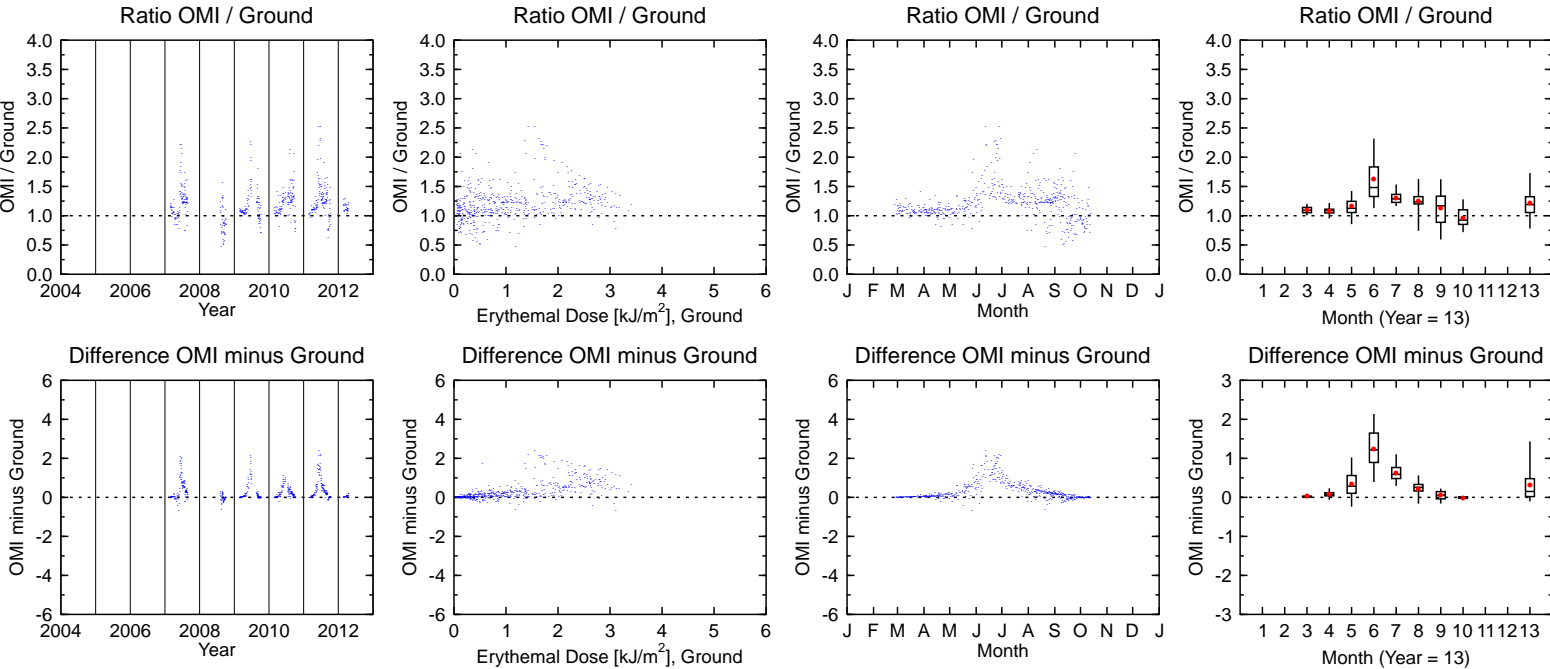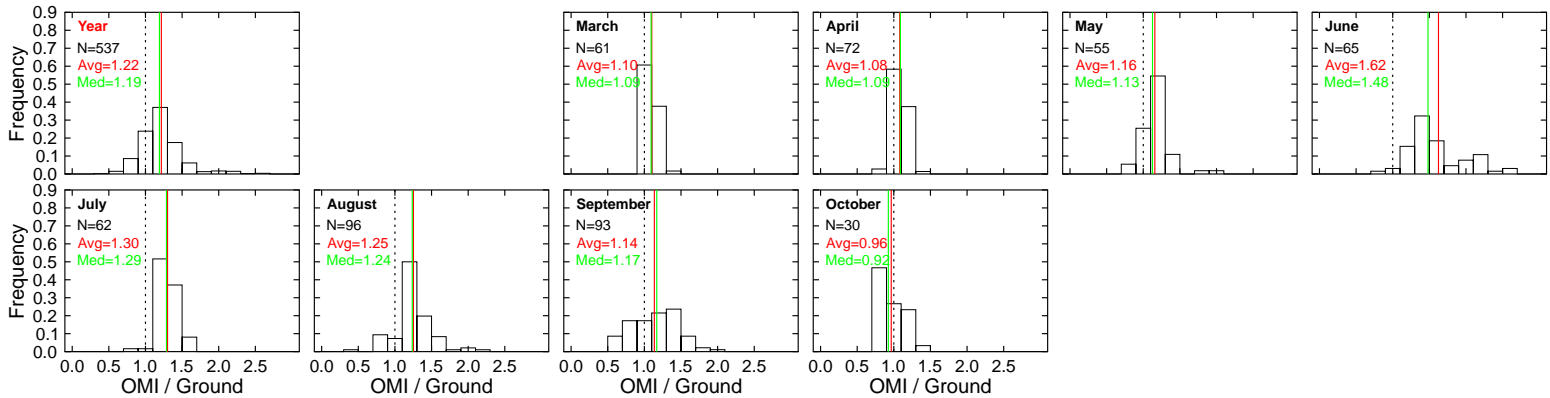

Supplement: Supplementary file 60 [file acp-15-7391-2015-supplement.zip]
