# Supplementary material for: Comparison of OMI UV observations with ground-based measurements at high northern latitudes
Source: Copernicus journal article supplement (doi:10.5194/acp-15-7391-2015), 2015-07-09

# Ny-Alesund, Svalbard (78.92°N, 11.92°E)

## EDDose, all data

| Month     | N    | Minimum | 5%   | 25%  | Median | Average | 75%  | 95%  | Maximum | W10 | W20 | W30 |
|-----------|------|---------|------|------|--------|---------|------|------|---------|-----|-----|-----|
| January   | 0    | 0.00    | 0.00 | 0.00 | 0.00   | 0.00    | 0.00 | 0.00 | 0.00    | 0   | 0   | 0   |
| February  | 20   | 0.42    | 0.42 | 1.25 | 1.49   | 1.55    | 1.99 | 3.16 | 3.16    | 0   | 5   | 15  |
| March     | 213  | 0.20    | 0.38 | 0.50 | 0.68   | 0.75    | 0.84 | 1.61 | 2.98    | 7   | 18  | 25  |
| April     | 221  | 0.22    | 0.34 | 0.51 | 0.61   | 0.60    | 0.70 | 0.80 | 0.95    | 1   | 3   | 9   |
| May       | 206  | 0.26    | 0.46 | 0.57 | 0.63   | 0.64    | 0.71 | 0.85 | 1.13    | 0   | 7   | 14  |
| June      | 193  | 0.52    | 0.62 | 0.72 | 0.83   | 0.85    | 0.95 | 1.20 | 1.89    | 26  | 45  | 62  |
| July      | 209  | 0.67    | 0.80 | 0.92 | 1.02   | 1.04    | 1.13 | 1.36 | 1.98    | 52  | 79  | 89  |
| August    | 203  | 0.63    | 0.82 | 0.98 | 1.08   | 1.09    | 1.19 | 1.38 | 1.83    | 39  | 70  | 86  |
| September | 199  | 0.53    | 0.61 | 0.79 | 0.97   | 0.98    | 1.13 | 1.46 | 1.86    | 30  | 49  | 67  |
| October   | 99   | 0.42    | 0.48 | 0.80 | 1.14   | 1.35    | 1.75 | 3.08 | 4.20    | 13  | 28  | 35  |
| November  | 0    | 0.00    | 0.00 | 0.00 | 0.00   | 0.00    | 0.00 | 0.00 | 0.00    | 0   | 0   | 0   |
| December  | 0    | 0.00    | 0.00 | 0.00 | 0.00   | 0.00    | 0.00 | 0.00 | 0.00    | 0   | 0   | 0   |
| Year      | 1563 | 0.20    | 0.44 | 0.64 | 0.83   | 0.89    | 1.05 | 1.46 | 4.20    | 21  | 37  | 48  |

Erythemal Dose [kJ/m<sup>2</sup>] versus Time

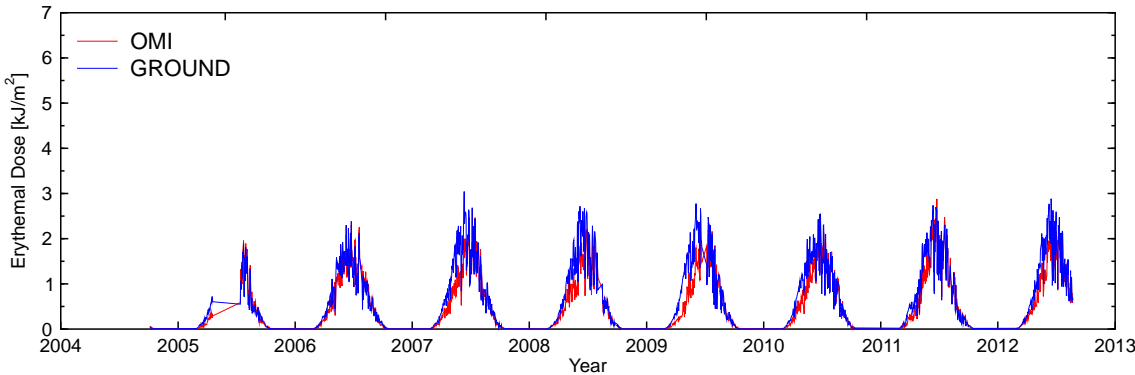

OMI versus Ground

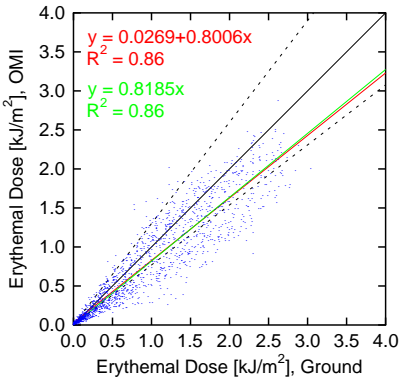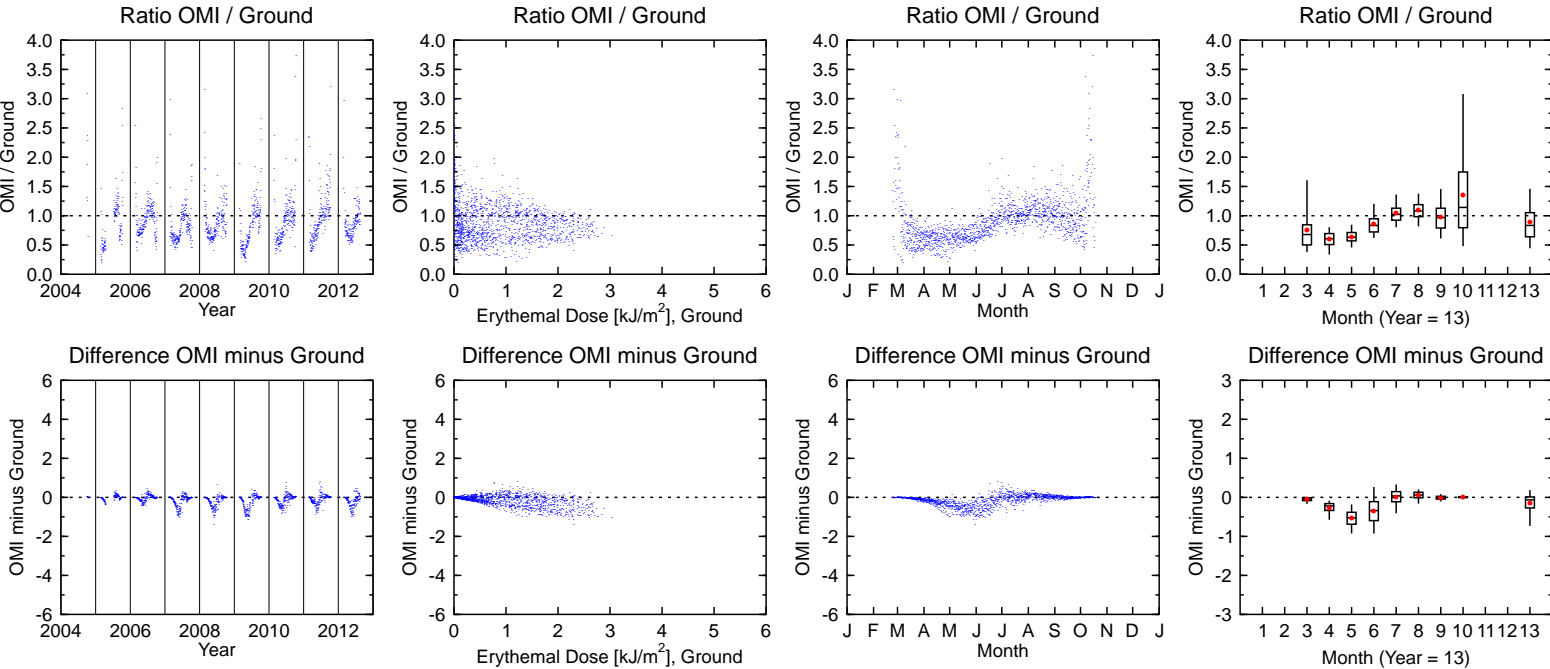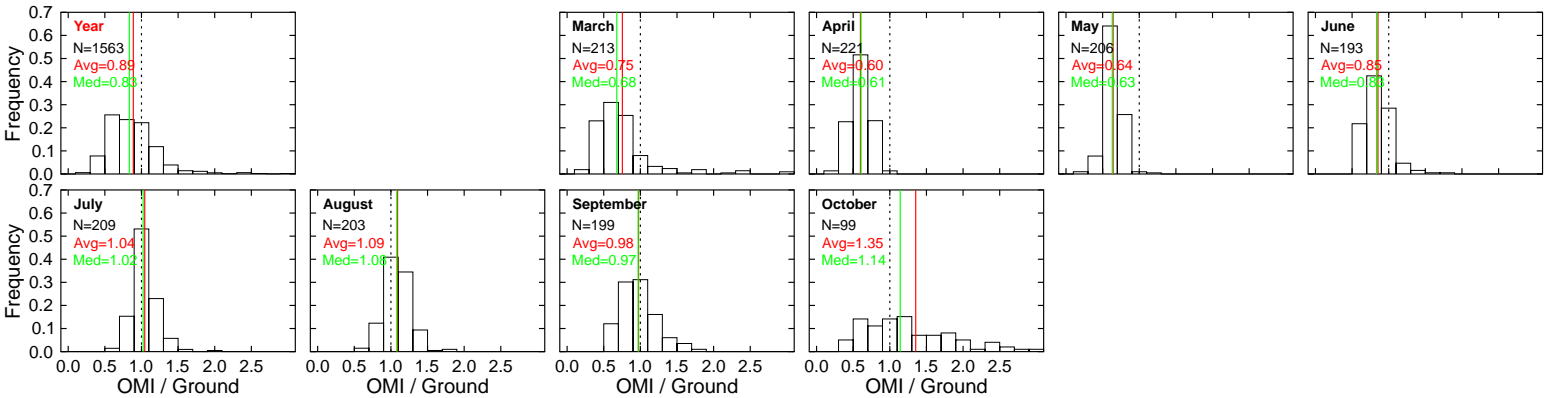

Supplement: Supplementary file 61 [file acp-15-7391-2015-supplement.zip]
