# Supplementary material for: Comparison of OMI UV observations with ground-based measurements at high northern latitudes
Source: Copernicus journal article supplement (doi:10.5194/acp-15-7391-2015), 2015-07-09

Blindern, Norway (59.94°N, 10.72°E)

EDRate (Ground at local solar noon), SZA less than 84, Dist less than 12 km

| Month     | N    | Minimum | 5%   | 25%  | Median | Average | 75%  | 95%  | Maximum | W10 | W20 | W30 |
|-----------|------|---------|------|------|--------|---------|------|------|---------|-----|-----|-----|
| January   | 196  | 0.45    | 0.74 | 0.93 | 1.08   | 1.38    | 1.32 | 2.71 | 19.00   | 30  | 49  | 65  |
| February  | 201  | 0.47    | 0.66 | 0.81 | 0.95   | 1.08    | 1.15 | 1.96 | 5.12    | 26  | 51  | 67  |
| March     | 208  | 0.41    | 0.69 | 0.89 | 1.04   | 1.12    | 1.24 | 1.87 | 4.04    | 35  | 54  | 67  |
| April     | 200  | 0.65    | 0.83 | 0.99 | 1.09   | 1.30    | 1.36 | 2.73 | 4.15    | 42  | 64  | 72  |
| May       | 177  | 0.45    | 0.75 | 0.94 | 1.07   | 1.34    | 1.45 | 2.77 | 7.53    | 37  | 53  | 65  |
| June      | 199  | 0.53    | 0.78 | 0.99 | 1.13   | 1.56    | 1.35 | 2.94 | 22.81   | 25  | 57  | 67  |
| July      | 211  | 0.54    | 0.78 | 1.02 | 1.13   | 1.46    | 1.55 | 3.12 | 10.39   | 33  | 47  | 56  |
| August    | 196  | 0.49    | 0.79 | 1.00 | 1.15   | 1.42    | 1.53 | 3.58 | 5.29    | 34  | 48  | 57  |
| September | 173  | 0.53    | 0.69 | 1.00 | 1.09   | 1.38    | 1.47 | 2.77 | 10.80   | 35  | 56  | 65  |
| October   | 224  | 0.50    | 0.75 | 1.02 | 1.13   | 1.41    | 1.57 | 2.95 | 5.27    | 31  | 54  | 62  |
| November  | 200  | 0.46    | 0.76 | 0.98 | 1.11   | 1.47    | 1.50 | 3.41 | 8.19    | 31  | 54  | 64  |
| December  | 131  | 0.38    | 0.71 | 0.86 | 1.03   | 1.25    | 1.37 | 2.32 | 5.87    | 32  | 48  | 64  |
| Year      | 2316 | 0.38    | 0.73 | 0.95 | 1.09   | 1.35    | 1.37 | 2.78 | 22.81   | 33  | 53  | 64  |

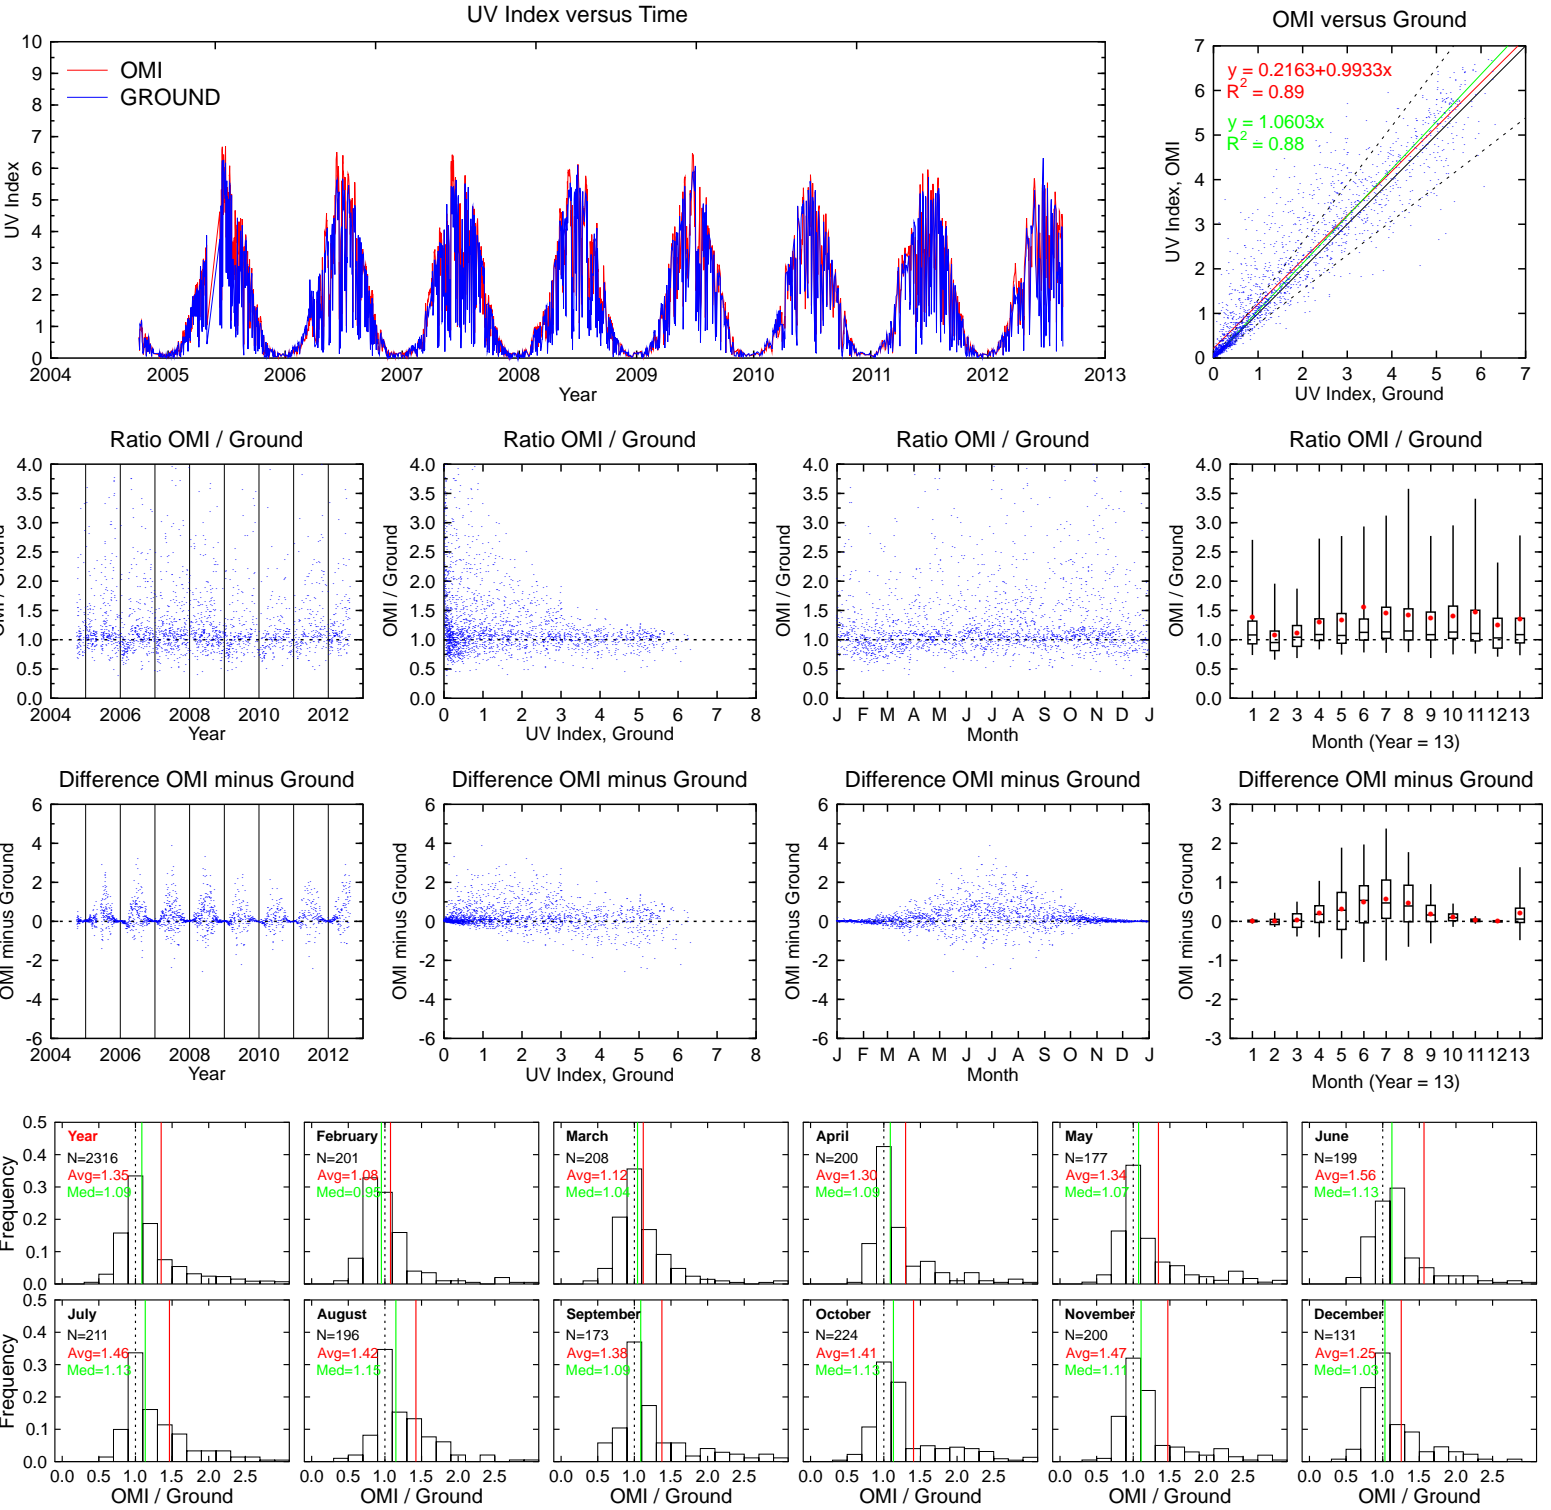

Supplement: Supplementary file 63 [file acp-15-7391-2015-supplement.zip]
