# Supplementary material for: Comparison of OMI UV observations with ground-based measurements at high northern latitudes
Source: Copernicus journal article supplement (doi:10.5194/acp-15-7391-2015), 2015-07-09

# Summit, Greenland (72.58°N, 38.46°E)

OPEDRate, SZA less than 84, Dist less than 12 km

| Month     | N    | Minimum | 5%   | 25%  | Median | Average | 75%  | 95%  | Maximum | W10 | W20 | W30 |
|-----------|------|---------|------|------|--------|---------|------|------|---------|-----|-----|-----|
| January   | 0    | 0.00    | 0.00 | 0.00 | 0.00   | 0.00    | 0.00 | 0.00 | 0.00    | 0   | 0   | 0   |
| February  | 68   | 0.94    | 0.97 | 1.02 | 1.04   | 1.05    | 1.07 | 1.17 | 1.18    | 79  | 100 | 100 |
| March     | 320  | 0.88    | 0.98 | 1.02 | 1.05   | 1.05    | 1.08 | 1.15 | 1.24    | 84  | 98  | 100 |
| April     | 319  | 0.99    | 1.01 | 1.04 | 1.06   | 1.08    | 1.10 | 1.17 | 1.29    | 76  | 97  | 100 |
| May       | 327  | 0.97    | 1.02 | 1.05 | 1.07   | 1.07    | 1.09 | 1.16 | 1.27    | 83  | 99  | 100 |
| June      | 277  | 0.95    | 1.02 | 1.05 | 1.07   | 1.08    | 1.09 | 1.15 | 1.39    | 78  | 99  | 100 |
| July      | 263  | 0.87    | 1.01 | 1.06 | 1.08   | 1.09    | 1.13 | 1.21 | 1.52    | 60  | 94  | 99  |
| August    | 350  | 0.88    | 1.02 | 1.05 | 1.10   | 1.11    | 1.15 | 1.25 | 1.39    | 51  | 89  | 98  |
| September | 347  | 0.96    | 1.00 | 1.05 | 1.09   | 1.09    | 1.13 | 1.21 | 1.27    | 59  | 93  | 100 |
| October   | 220  | 0.94    | 0.97 | 1.02 | 1.05   | 1.06    | 1.10 | 1.16 | 1.32    | 78  | 98  | 100 |
| November  | 0    | 0.00    | 0.00 | 0.00 | 0.00   | 0.00    | 0.00 | 0.00 | 0.00    | 0   | 0   | 0   |
| December  | 0    | 0.00    | 0.00 | 0.00 | 0.00   | 0.00    | 0.00 | 0.00 | 0.00    | 0   | 0   | 0   |
| Year      | 2491 | 0.87    | 1.00 | 1.04 | 1.07   | 1.08    | 1.11 | 1.19 | 1.52    | 71  | 96  | 100 |

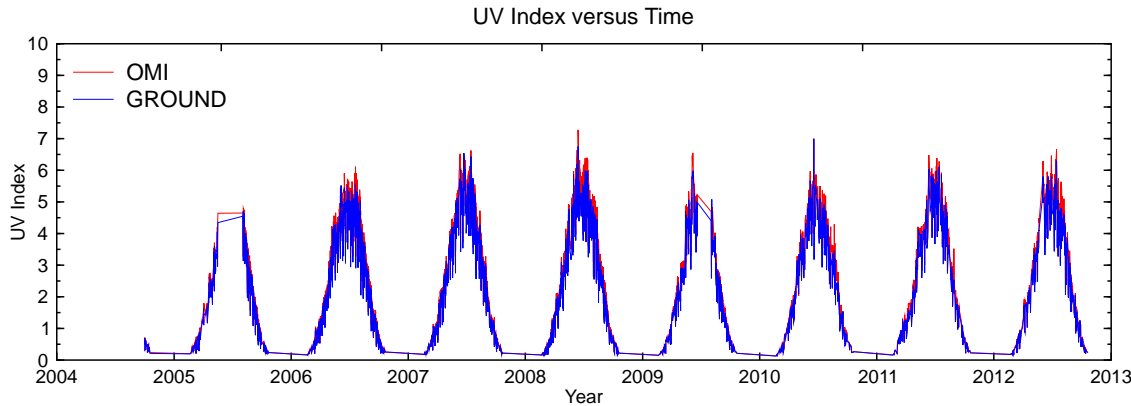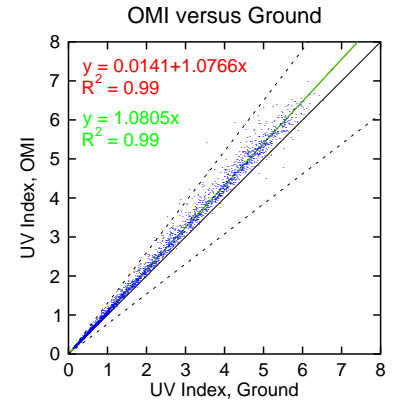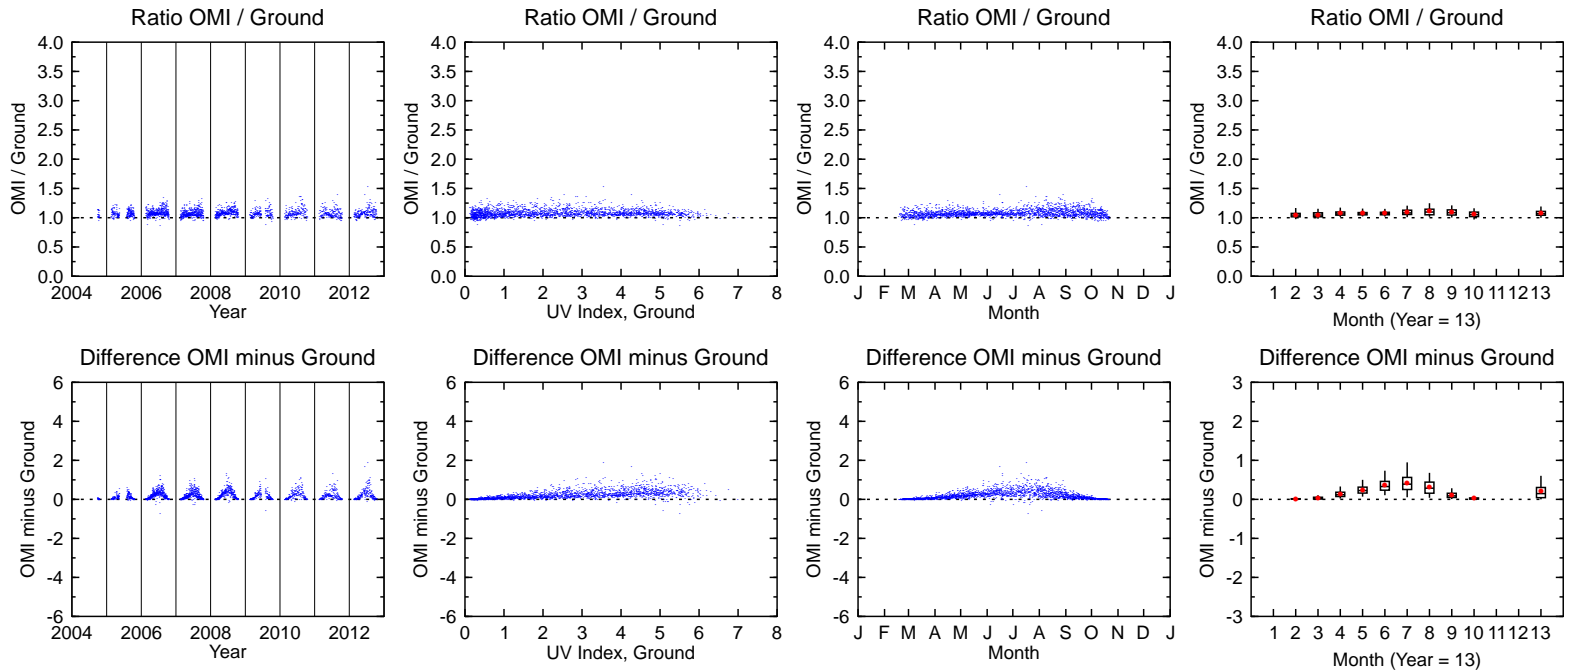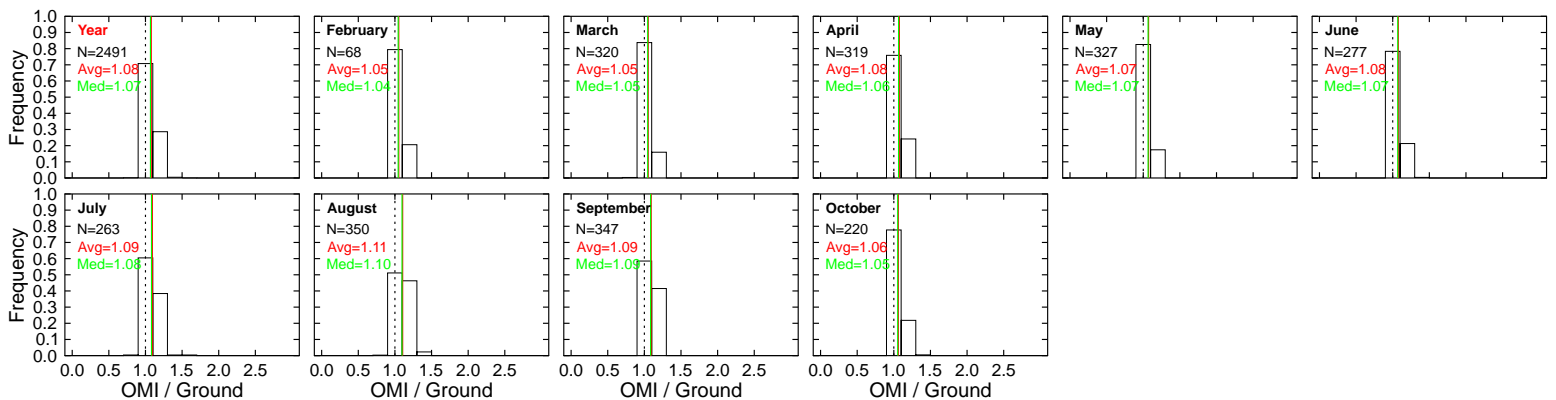

Supplement: Supplementary file 64 [file acp-15-7391-2015-supplement.zip]
