# Supplementary material for: Comparison of OMI UV observations with ground-based measurements at high northern latitudes
Source: Copernicus journal article supplement (doi:10.5194/acp-15-7391-2015), 2015-07-09

Eureka, Canada (79.99°N, 85.93°E)  
EDDose, SZA less than 84, Dist less than 12 km

| Month     | N   | Minimum | 5%   | 25%  | Median | Average | 75%  | 95%  | Maximum | W10 | W20 | W30 |
|-----------|-----|---------|------|------|--------|---------|------|------|---------|-----|-----|-----|
| January   | 0   | 0.00    | 0.00 | 0.00 | 0.00   | 0.00    | 0.00 | 0.00 | 0.00    | 0   | 0   | 0   |
| February  | 0   | 0.00    | 0.00 | 0.00 | 0.00   | 0.00    | 0.00 | 0.00 | 0.00    | 0   | 0   | 0   |
| March     | 50  | 0.96    | 1.01 | 1.04 | 1.08   | 1.10    | 1.12 | 1.22 | 1.73    | 60  | 94  | 98  |
| April     | 49  | 0.88    | 0.99 | 1.06 | 1.11   | 1.12    | 1.15 | 1.26 | 1.43    | 41  | 92  | 96  |
| May       | 82  | 0.53    | 0.76 | 1.07 | 1.12   | 1.12    | 1.20 | 1.38 | 1.90    | 32  | 65  | 84  |
| June      | 140 | 0.73    | 0.86 | 1.11 | 1.20   | 1.20    | 1.29 | 1.46 | 1.97    | 16  | 46  | 76  |
| July      | 166 | 0.56    | 0.87 | 1.03 | 1.12   | 1.11    | 1.19 | 1.32 | 1.67    | 34  | 73  | 91  |
| August    | 167 | 0.72    | 0.85 | 1.12 | 1.19   | 1.20    | 1.26 | 1.48 | 2.36    | 14  | 51  | 81  |
| September | 102 | 0.16    | 0.63 | 0.99 | 1.29   | 1.25    | 1.45 | 1.88 | 2.70    | 7   | 21  | 41  |
| October   | 0   | 0.00    | 0.00 | 0.00 | 0.00   | 0.00    | 0.00 | 0.00 | 0.00    | 0   | 0   | 0   |
| November  | 0   | 0.00    | 0.00 | 0.00 | 0.00   | 0.00    | 0.00 | 0.00 | 0.00    | 0   | 0   | 0   |
| December  | 0   | 0.00    | 0.00 | 0.00 | 0.00   | 0.00    | 0.00 | 0.00 | 0.00    | 0   | 0   | 0   |
| Year      | 756 | 0.16    | 0.81 | 1.07 | 1.15   | 1.17    | 1.25 | 1.51 | 2.70    | 25  | 58  | 79  |

Erythemal Dose [kJ/m<sup>2</sup>] versus Time

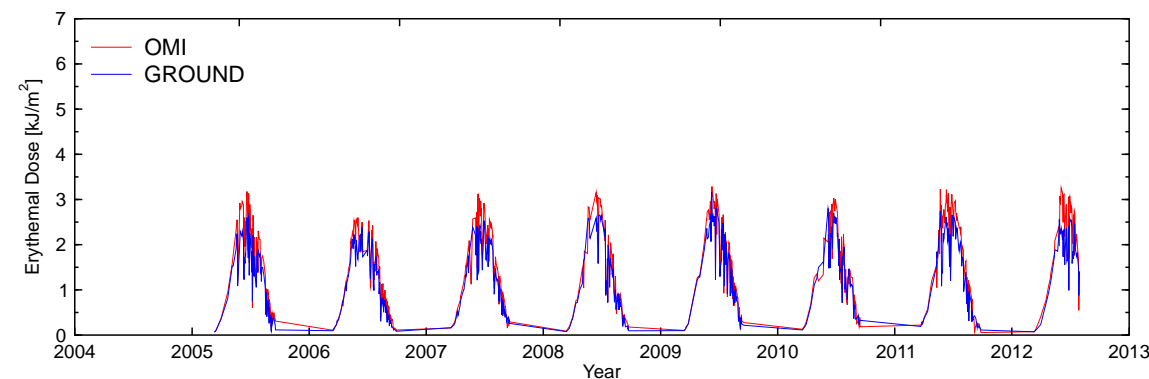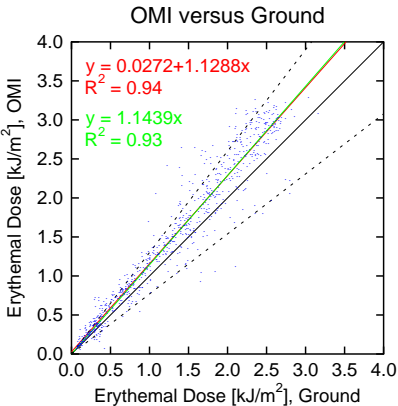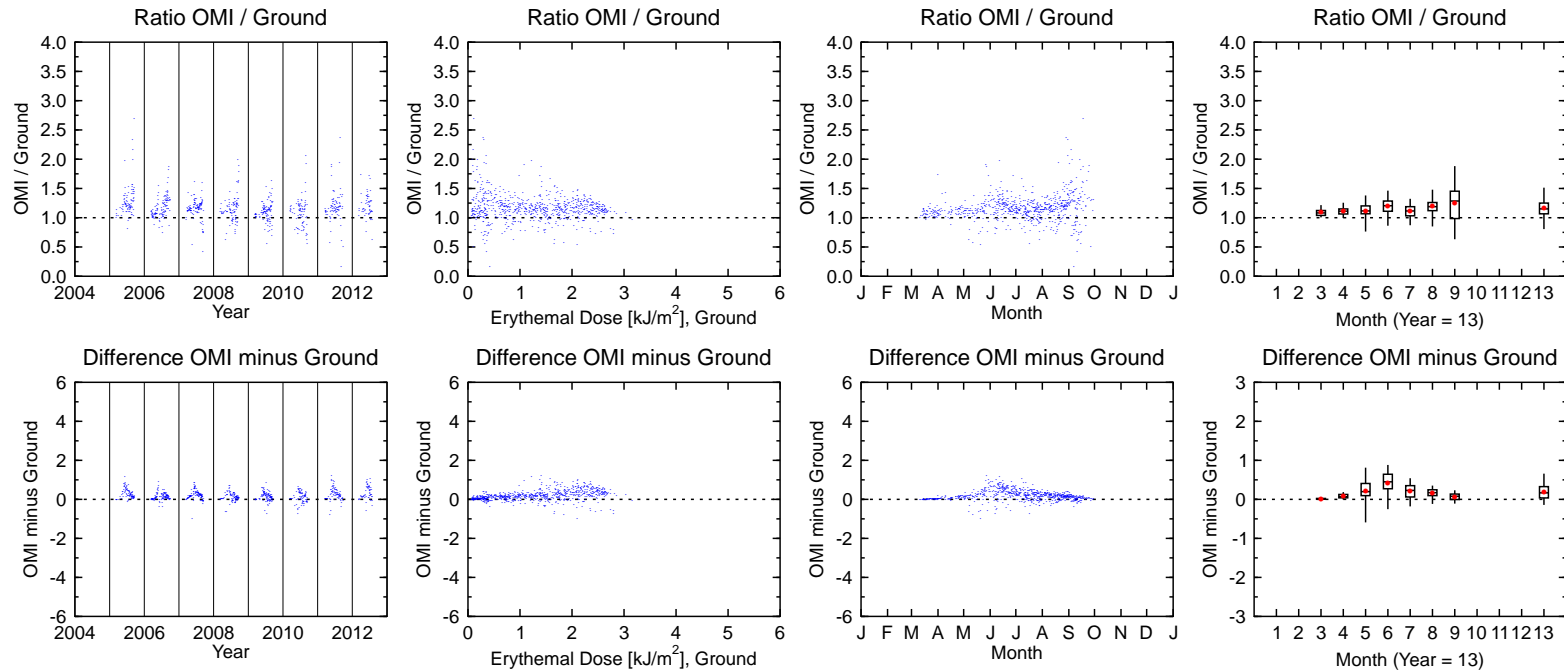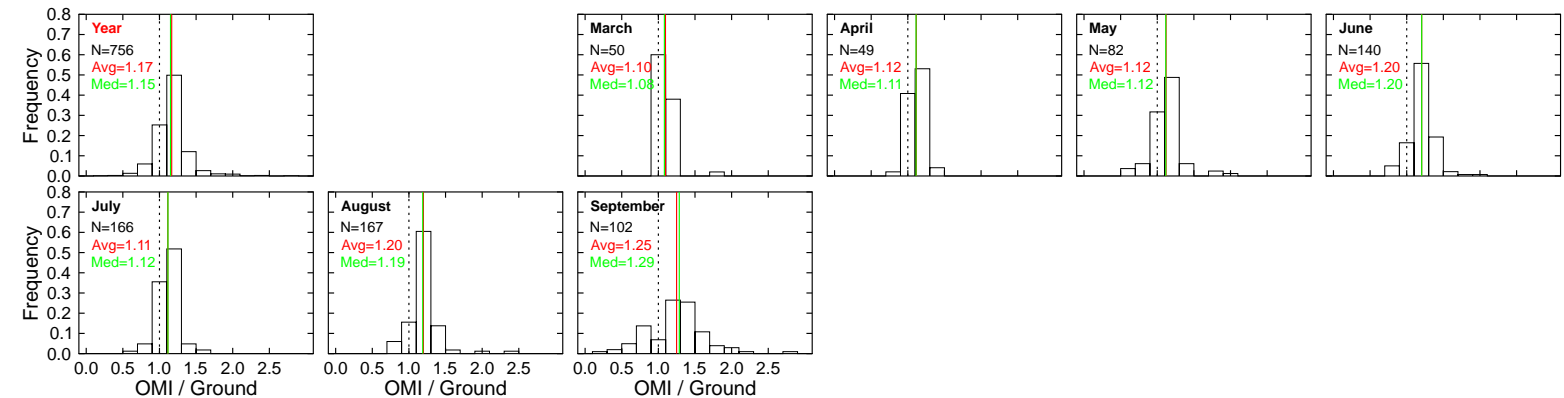

Supplement: Supplementary file 66 [file acp-15-7391-2015-supplement.zip]
