# Supplementary material for: Comparison of OMI UV observations with ground-based measurements at high northern latitudes
Source: Copernicus journal article supplement (doi:10.5194/acp-15-7391-2015), 2015-07-09

Trondheim, Norway (63.42°N, 10.4°E)

EDRate (Ground at local solar noon), SZA less than 84, Dist less than 12 km

| Month     | N    | Minimum | 5%   | 25%  | Median | Average | 75%  | 95%  | Maximum | W10 | W20 | W30 |
|-----------|------|---------|------|------|--------|---------|------|------|---------|-----|-----|-----|
| January   | 56   | 1.06    | 1.10 | 1.38 | 1.55   | 1.79    | 2.14 | 3.22 | 4.08    | 5   | 14  | 25  |
| February  | 192  | 0.62    | 1.17 | 1.29 | 1.48   | 1.74    | 1.89 | 3.09 | 7.33    | 1   | 8   | 26  |
| March     | 208  | 0.98    | 1.20 | 1.33 | 1.51   | 1.82    | 2.02 | 3.28 | 7.22    | 1   | 5   | 19  |
| April     | 223  | 1.02    | 1.24 | 1.36 | 1.78   | 2.10    | 2.54 | 4.41 | 6.62    | 0.  | 3   | 13  |
| May       | 212  | 0.56    | 1.03 | 1.24 | 1.53   | 2.27    | 2.08 | 4.04 | 94.63   | 8   | 19  | 33  |
| June      | 226  | 0.63    | 0.85 | 1.14 | 1.27   | 1.48    | 1.57 | 2.20 | 21.58   | 11  | 33  | 51  |
| July      | 256  | 0.66    | 0.87 | 1.07 | 1.17   | 1.39    | 1.49 | 2.55 | 6.25    | 24  | 50  | 61  |
| August    | 229  | 0.45    | 0.79 | 1.02 | 1.14   | 1.32    | 1.38 | 2.01 | 14.57   | 27  | 53  | 65  |
| September | 212  | 0.49    | 0.75 | 1.04 | 1.16   | 1.24    | 1.35 | 2.09 | 3.11    | 23  | 46  | 64  |
| October   | 243  | 0.65    | 0.88 | 1.10 | 1.24   | 1.43    | 1.47 | 2.71 | 6.56    | 19  | 38  | 59  |
| November  | 112  | 0.69    | 0.97 | 1.24 | 1.38   | 1.60    | 1.64 | 2.98 | 5.54    | 5   | 20  | 36  |
| December  | 0    | 0.00    | 0.00 | 0.00 | 0.00   | 0.00    | 0.00 | 0.00 | 0.00    | 0   | 0   | 0   |
| Year      | 2169 | 0.45    | 0.89 | 1.15 | 1.33   | 1.63    | 1.73 | 3.07 | 94.63   | 12  | 29  | 43  |

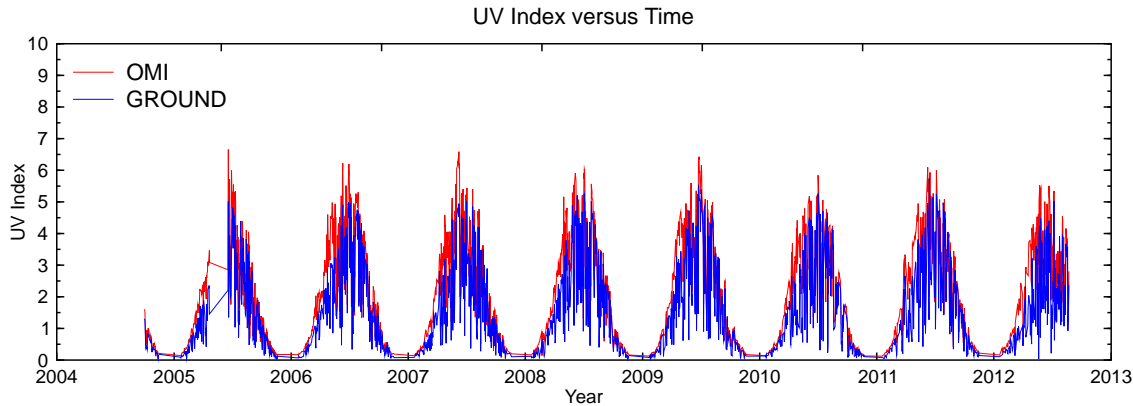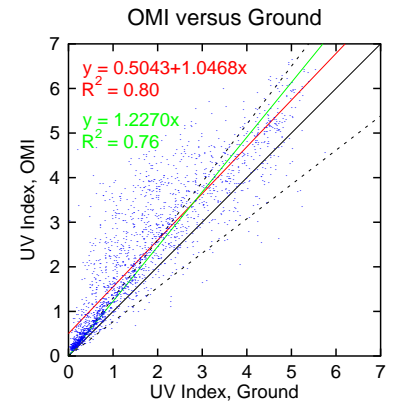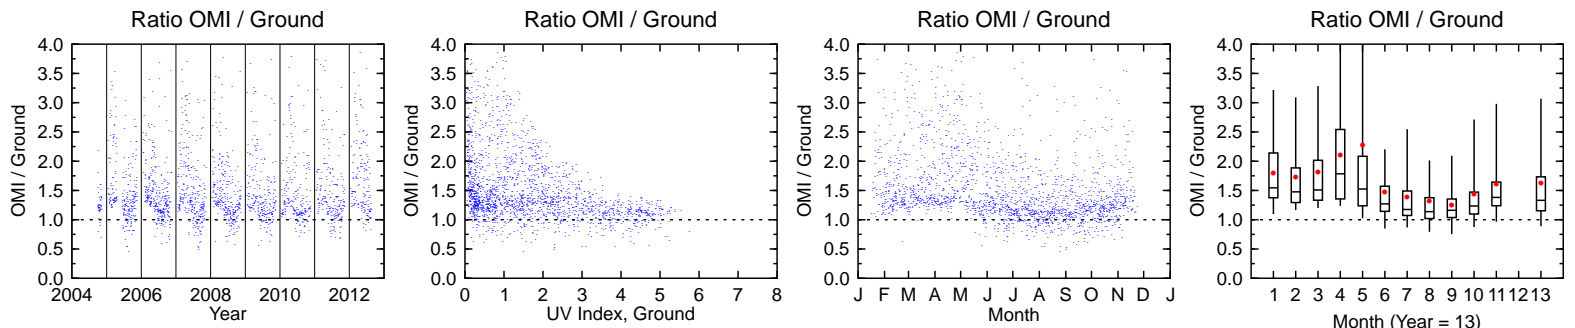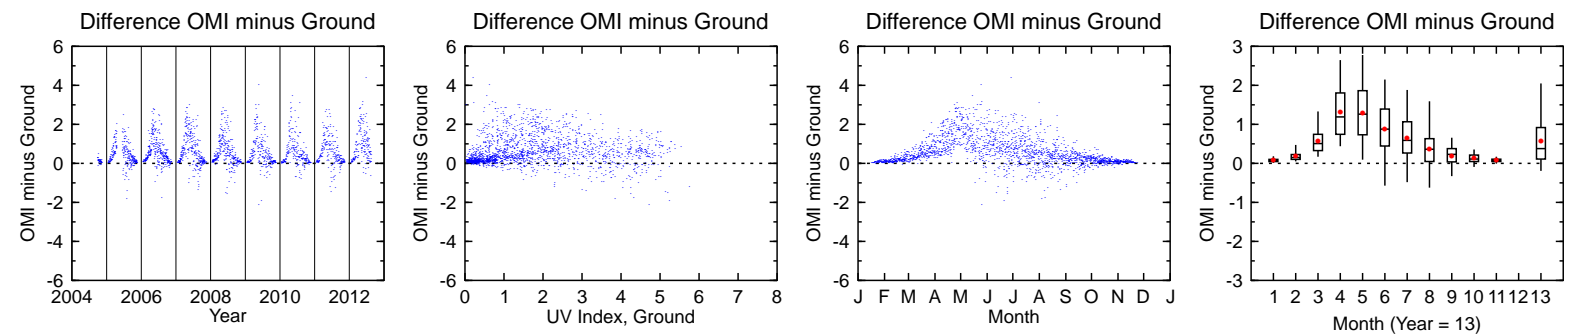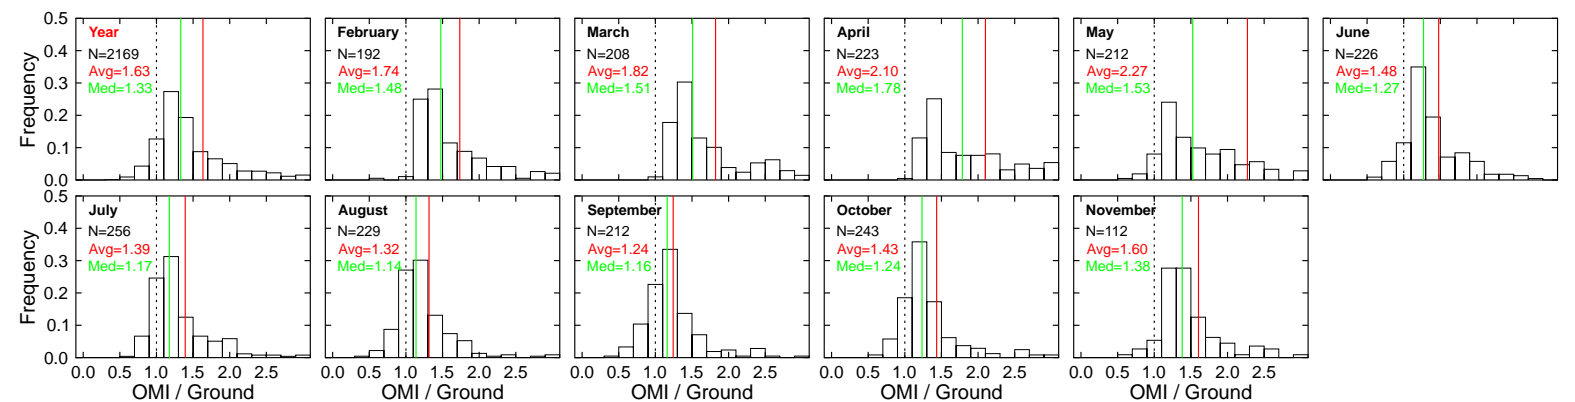

Supplement: Supplementary file 67 [file acp-15-7391-2015-supplement.zip]
