# Supplementary material for: Comparison of OMI UV observations with ground-based measurements at high northern latitudes
Source: Copernicus journal article supplement (doi:10.5194/acp-15-7391-2015), 2015-07-09

Oesteraas, Norway (59.95°N, 10.6°E)  
CSEDDose, SZA less than 84, Dist less than 12 km

| Month     | N    | Minimum | 5%   | 25%  | Median | Average | 75%  | 95%   | Maximum | W10 | W20 | W30 |
|-----------|------|---------|------|------|--------|---------|------|-------|---------|-----|-----|-----|
| January   | 158  | 0.91    | 0.97 | 1.11 | 1.53   | 2.26    | 2.33 | 6.75  | 14.60   | 24  | 35  | 41  |
| February  | 166  | 0.93    | 0.99 | 1.13 | 1.35   | 1.91    | 1.88 | 4.53  | 13.75   | 22  | 32  | 43  |
| March     | 169  | 0.99    | 1.02 | 1.11 | 1.27   | 1.74    | 1.82 | 3.95  | 10.98   | 24  | 39  | 52  |
| April     | 159  | 1.04    | 1.11 | 1.19 | 1.49   | 2.22    | 2.47 | 6.13  | 12.88   | 1   | 26  | 40  |
| May       | 156  | 1.13    | 1.16 | 1.30 | 1.53   | 2.31    | 2.31 | 7.86  | 18.01   | 0   | 10  | 26  |
| June      | 169  | 1.12    | 1.16 | 1.26 | 1.46   | 2.04    | 1.93 | 5.21  | 11.93   | 0   | 12  | 29  |
| July      | 166  | 1.04    | 1.18 | 1.33 | 1.63   | 2.23    | 2.34 | 5.68  | 10.09   | 1   | 6   | 21  |
| August    | 160  | 1.12    | 1.18 | 1.30 | 1.61   | 2.29    | 2.23 | 5.03  | 14.86   | 0   | 9   | 24  |
| September | 141  | 1.13    | 1.15 | 1.27 | 1.59   | 2.37    | 2.56 | 6.62  | 18.49   | 0   | 16  | 30  |
| October   | 179  | 1.07    | 1.14 | 1.25 | 1.69   | 3.02    | 2.95 | 11.63 | 21.15   | 1   | 17  | 31  |
| November  | 159  | 0.95    | 1.07 | 1.19 | 1.48   | 2.84    | 3.07 | 10.44 | 17.39   | 11  | 28  | 45  |
| December  | 128  | 0.96    | 1.01 | 1.14 | 1.54   | 2.79    | 2.78 | 9.16  | 25.37   | 19  | 33  | 38  |
| Year      | 1910 | 0.91    | 1.05 | 1.22 | 1.50   | 2.33    | 2.32 | 6.52  | 25.37   | 8   | 22  | 35  |

Erythemal Dose [kJ/m<sup>2</sup>] versus Time

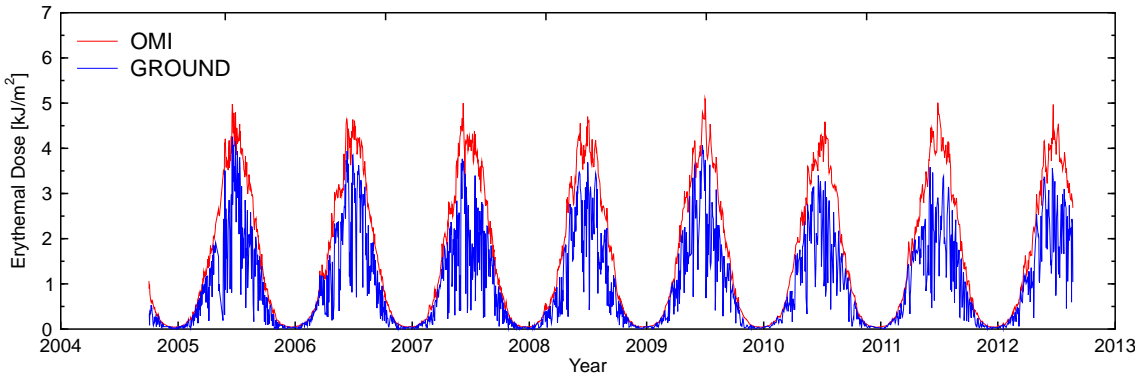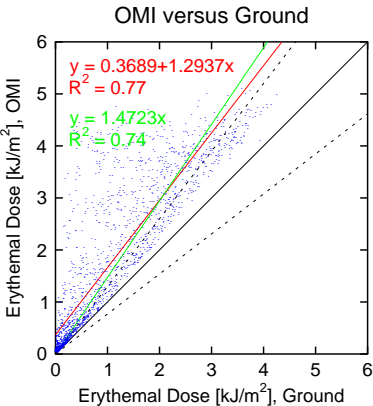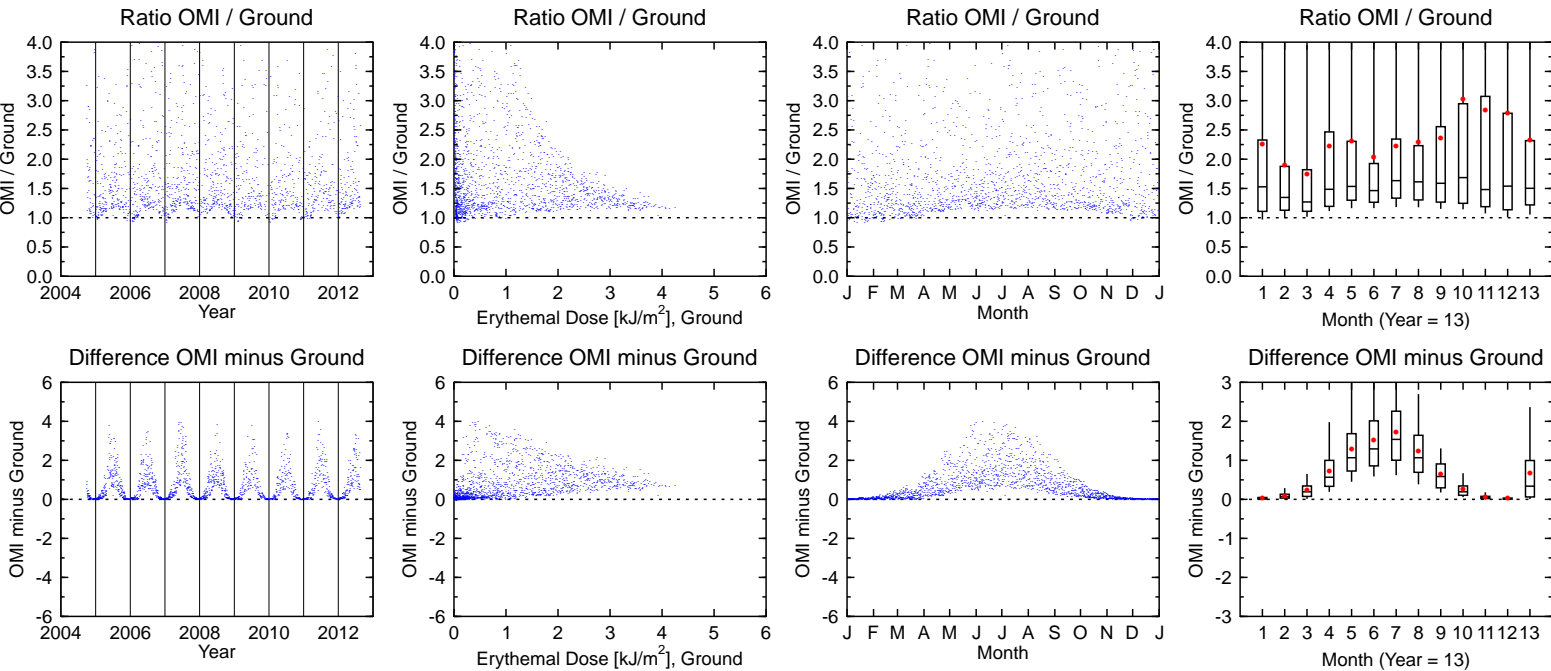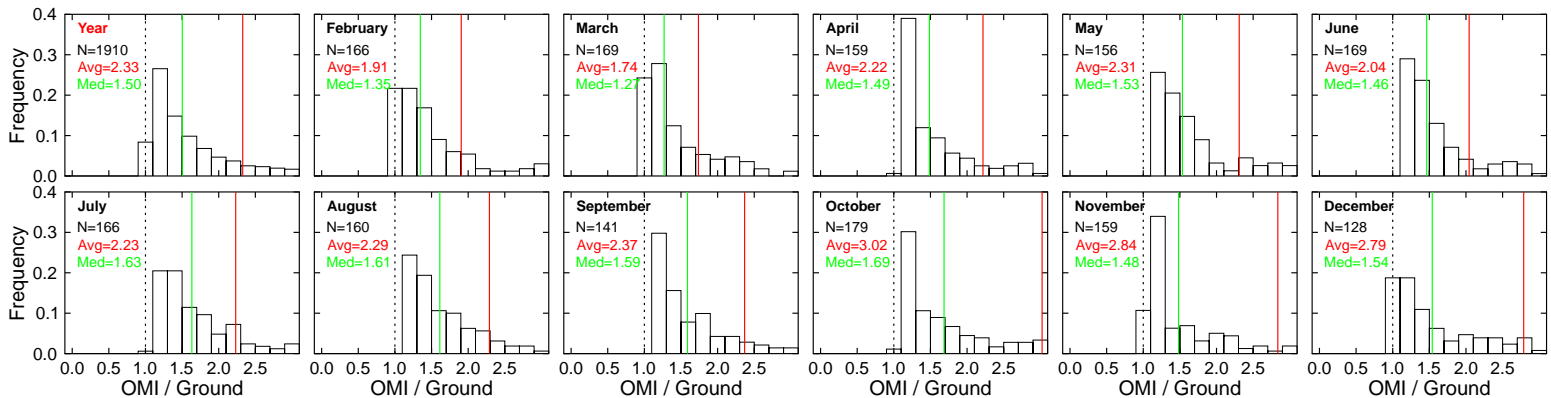

Supplement: Supplementary file 68 [file acp-15-7391-2015-supplement.zip]
