# Supplementary material for: Comparison of OMI UV observations with ground-based measurements at high northern latitudes
Source: Copernicus journal article supplement (doi:10.5194/acp-15-7391-2015), 2015-07-09

Jokioinen, Finland (60.82°N, 23.5°E)

OPEDRate, SZA less than 84, Dist less than 12 km

| Month     | N    | Minimum | 5%   | 25%  | Median | Average | 75%  | 95%  | Maximum | W10 | W20 | W30 |
|-----------|------|---------|------|------|--------|---------|------|------|---------|-----|-----|-----|
| January   | 125  | 0.51    | 0.60 | 0.78 | 0.95   | 1.08    | 1.18 | 2.05 | 3.29    | 20  | 44  | 55  |
| February  | 86   | 0.52    | 0.61 | 0.74 | 0.87   | 0.92    | 1.07 | 1.31 | 1.58    | 22  | 43  | 63  |
| March     | 68   | 0.59    | 0.60 | 0.75 | 0.85   | 0.93    | 1.01 | 1.50 | 2.12    | 25  | 43  | 57  |
| April     | 116  | 0.48    | 0.72 | 1.00 | 1.06   | 1.13    | 1.26 | 1.63 | 2.08    | 46  | 59  | 73  |
| May       | 143  | 0.60    | 0.84 | 0.99 | 1.06   | 1.14    | 1.22 | 1.69 | 3.20    | 46  | 69  | 81  |
| June      | 157  | 0.69    | 0.79 | 0.97 | 1.06   | 1.18    | 1.24 | 1.83 | 4.55    | 48  | 66  | 76  |
| July      | 165  | 0.68    | 0.79 | 0.93 | 1.03   | 1.11    | 1.16 | 1.74 | 2.67    | 48  | 68  | 79  |
| August    | 147  | 0.64    | 0.80 | 0.93 | 1.04   | 1.13    | 1.24 | 1.75 | 2.93    | 42  | 63  | 78  |
| September | 118  | 0.46    | 0.76 | 0.94 | 1.05   | 1.10    | 1.17 | 1.59 | 2.20    | 46  | 68  | 80  |
| October   | 113  | 0.46    | 0.77 | 0.99 | 1.09   | 1.14    | 1.28 | 1.75 | 2.46    | 40  | 60  | 76  |
| November  | 71   | 0.32    | 0.45 | 0.70 | 0.98   | 1.03    | 1.30 | 1.91 | 2.11    | 23  | 32  | 46  |
| December  | 25   | 0.23    | 0.36 | 0.68 | 1.01   | 1.00    | 1.29 | 1.75 | 1.78    | 20  | 32  | 48  |
| Year      | 1334 | 0.23    | 0.67 | 0.91 | 1.04   | 1.10    | 1.21 | 1.74 | 4.55    | 39  | 58  | 71  |

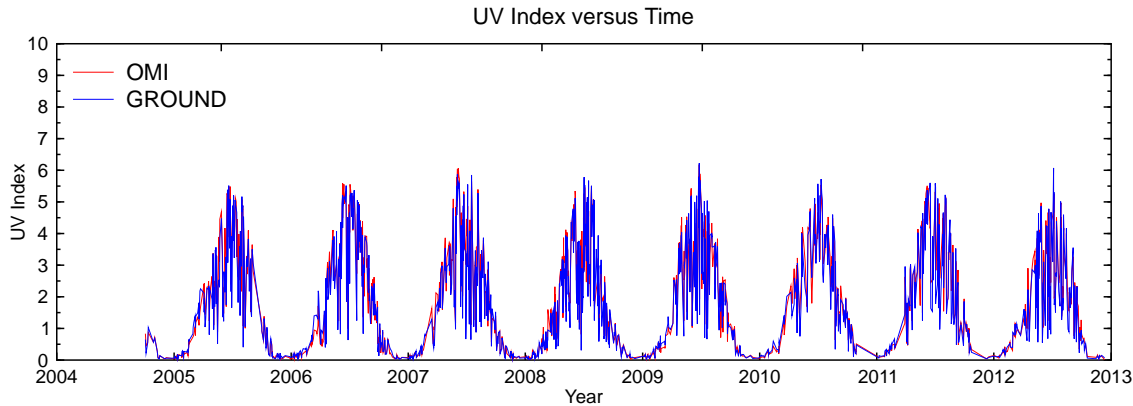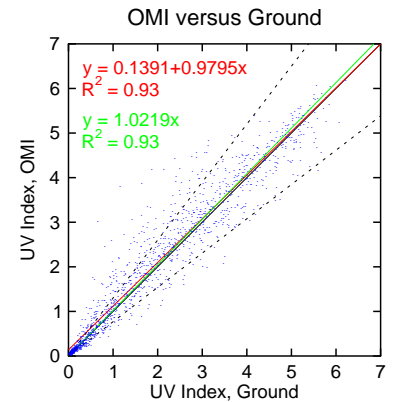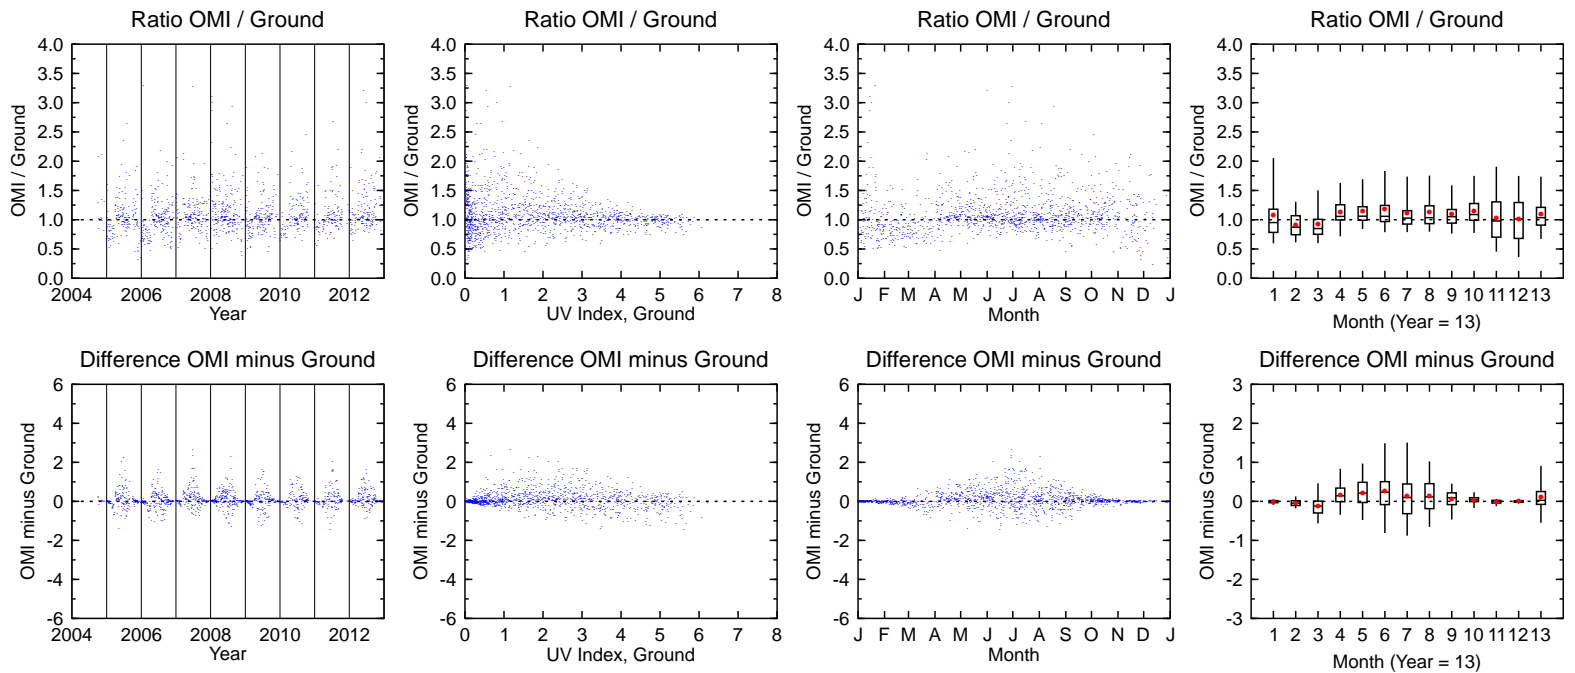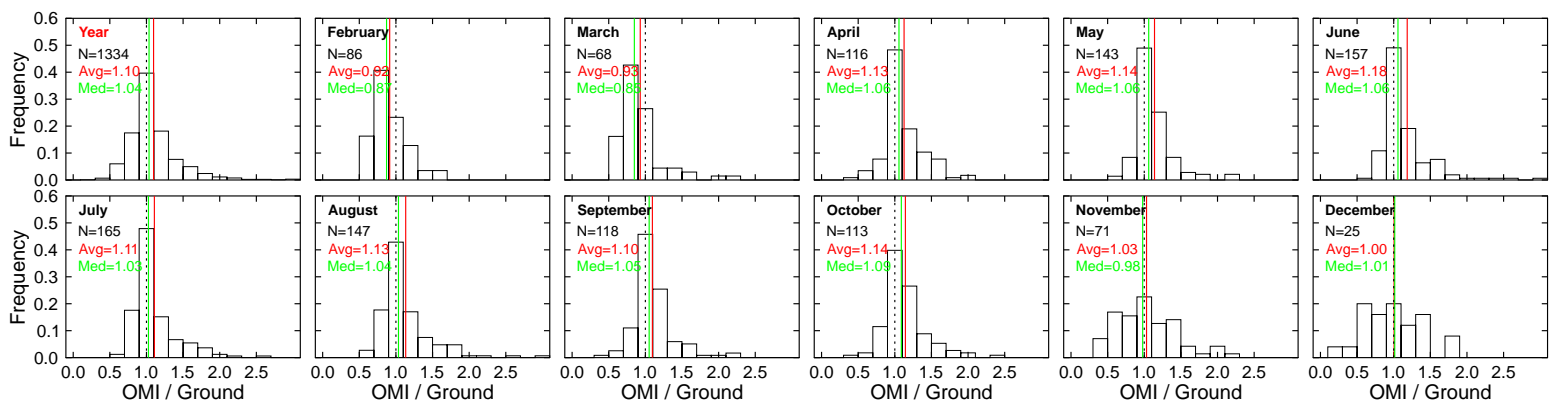

Supplement: Supplementary file 69 [file acp-15-7391-2015-supplement.zip]
