# Supplementary material for: Comparison of OMI UV observations with ground-based measurements at high northern latitudes
Source: Copernicus journal article supplement (doi:10.5194/acp-15-7391-2015), 2015-07-09

Finse, Norway (60.60°N, 7.52°E)  
OPEDRate, SZA less than 84, Dist less than 12 km

| Month     | N    | Minimum | 5%   | 25%  | Median | Average | 75%  | 95%  | Maximum | W10 | W20 | W30 |
|-----------|------|---------|------|------|--------|---------|------|------|---------|-----|-----|-----|
| January   | 25   | 0.20    | 0.23 | 0.28 | 0.49   | 0.58    | 0.93 | 1.01 | 1.20    | 24  | 32  | 32  |
| February  | 73   | 0.16    | 0.22 | 0.32 | 0.47   | 0.51    | 0.62 | 0.97 | 1.02    | 7   | 10  | 14  |
| March     | 115  | 0.14    | 0.16 | 0.27 | 0.47   | 0.48    | 0.62 | 0.91 | 0.96    | 4   | 8   | 12  |
| April     | 160  | 0.14    | 0.16 | 0.25 | 0.37   | 0.45    | 0.61 | 0.97 | 1.41    | 4   | 9   | 11  |
| May       | 179  | 0.14    | 0.23 | 0.41 | 0.57   | 0.58    | 0.73 | 1.04 | 1.43    | 8   | 13  | 17  |
| June      | 189  | 0.37    | 0.50 | 0.64 | 0.79   | 0.93    | 1.05 | 1.95 | 3.26    | 15  | 30  | 40  |
| July      | 215  | 0.38    | 0.59 | 0.77 | 0.96   | 1.09    | 1.21 | 1.97 | 4.40    | 27  | 41  | 54  |
| August    | 204  | 0.33    | 0.66 | 0.85 | 1.01   | 1.27    | 1.37 | 2.49 | 6.38    | 28  | 40  | 54  |
| September | 160  | 0.14    | 0.57 | 0.84 | 1.02   | 1.13    | 1.24 | 2.03 | 5.36    | 32  | 51  | 61  |
| October   | 205  | 0.10    | 0.25 | 0.45 | 0.82   | 0.96    | 1.14 | 2.36 | 5.23    | 15  | 29  | 39  |
| November  | 109  | 0.11    | 0.17 | 0.25 | 0.51   | 0.60    | 0.81 | 1.32 | 2.44    | 7   | 16  | 25  |
| December  | 13   | 0.13    | 0.13 | 0.25 | 0.32   | 0.36    | 0.39 | 0.99 | 0.99    | 8   | 8   | 8   |
| Year      | 1647 | 0.10    | 0.22 | 0.48 | 0.75   | 0.85    | 1.03 | 1.88 | 6.38    | 17  | 27  | 36  |

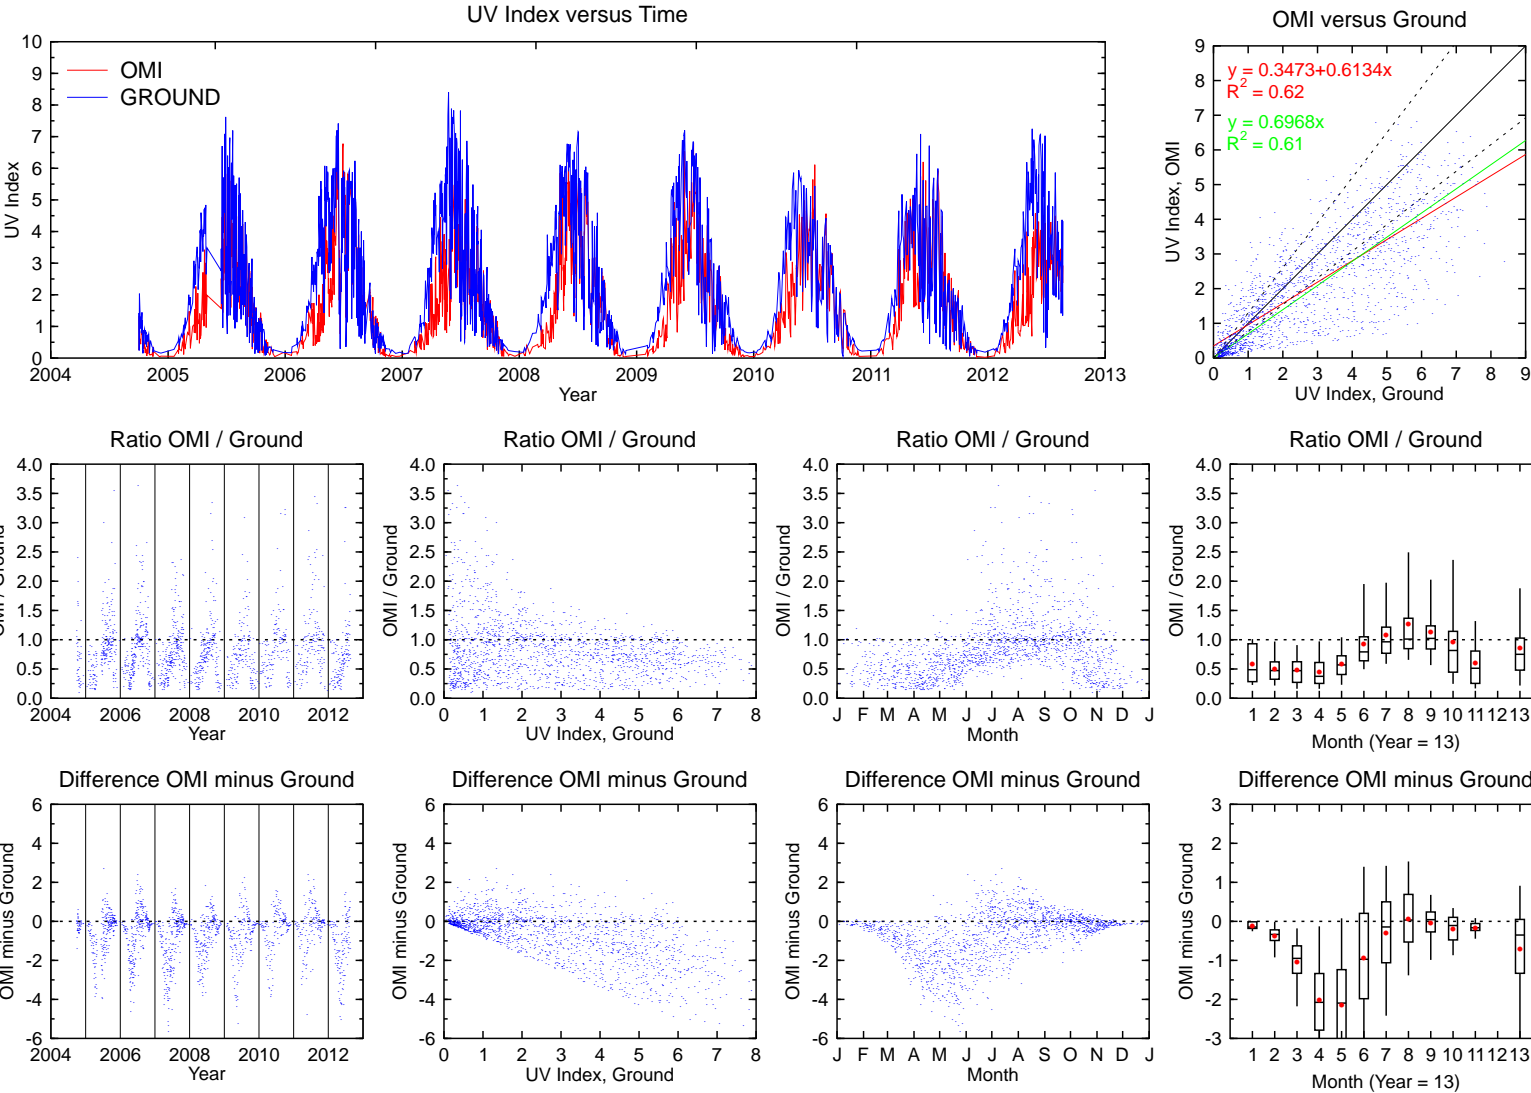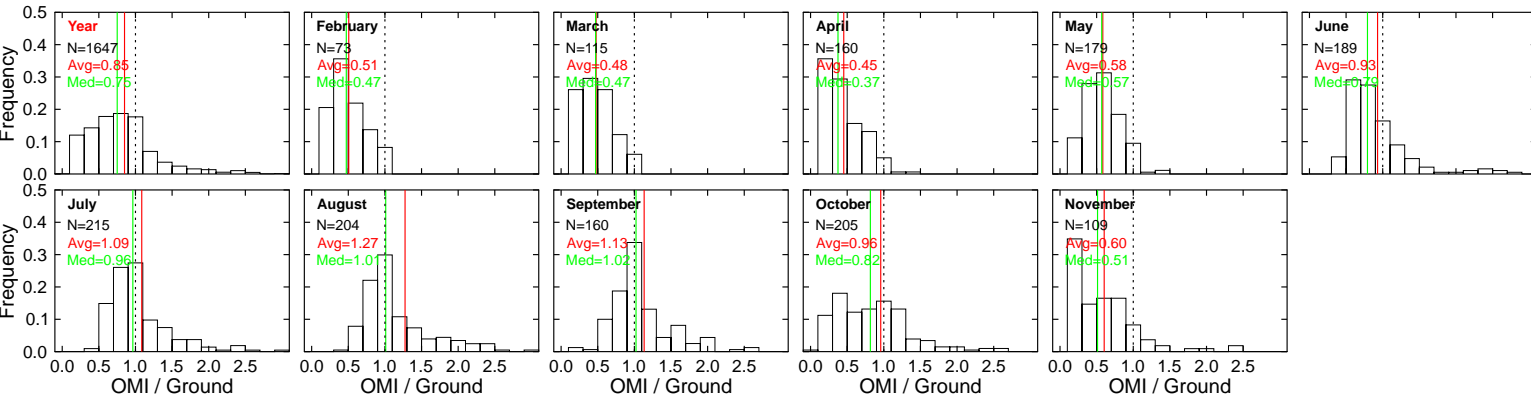

Supplement: Supplementary file 70 [file acp-15-7391-2015-supplement.zip]
