# Supplementary material for: Comparison of OMI UV observations with ground-based measurements at high northern latitudes
Source: Copernicus journal article supplement (doi:10.5194/acp-15-7391-2015), 2015-07-09
Supplement: Supplementary file 71 [file acp-15-7391-2015-supplement.zip]

OPEDRate; SZA less than 84; Dist less than 12 km

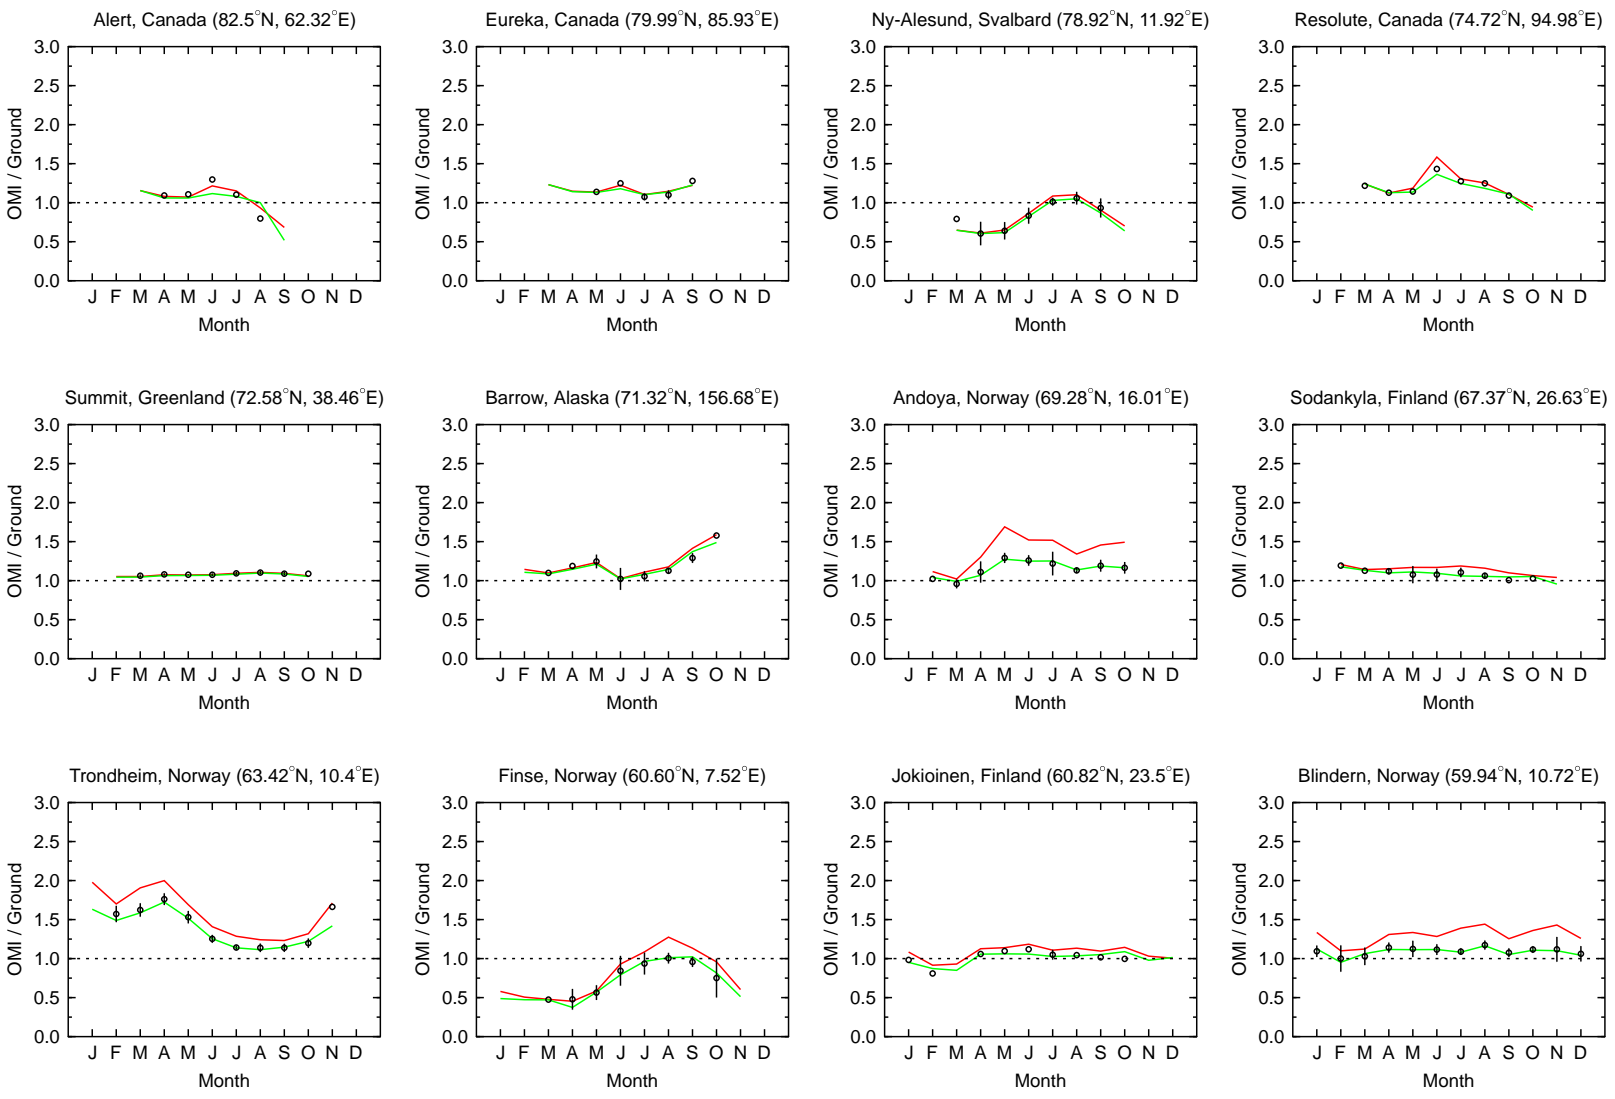

- Average (monthly)
- Average (instantaneous)
- Median (instantaneous)
