# Supplementary material for: Comparison of OMI UV observations with ground-based measurements at high northern latitudes
Source: Copernicus journal article supplement (doi:10.5194/acp-15-7391-2015), 2015-07-09

Oesteraas, Norway (59.95°N, 10.6°E)  
EDDose, SZA less than 84, Dist less than 12 km

| Month     | N    | Minimum | 5%   | 25%  | Median | Average | 75%  | 95%  | Maximum | W10 | W20 | W30 |
|-----------|------|---------|------|------|--------|---------|------|------|---------|-----|-----|-----|
| January   | 158  | 0.45    | 0.71 | 0.88 | 1.02   | 1.14    | 1.17 | 2.13 | 6.11    | 39  | 59  | 73  |
| February  | 166  | 0.59    | 0.67 | 0.80 | 0.89   | 0.97    | 1.08 | 1.50 | 2.83    | 23  | 54  | 70  |
| March     | 169  | 0.56    | 0.68 | 0.84 | 0.94   | 1.01    | 1.11 | 1.42 | 2.71    | 31  | 61  | 73  |
| April     | 159  | 0.71    | 0.83 | 1.00 | 1.07   | 1.15    | 1.16 | 1.77 | 3.02    | 48  | 72  | 81  |
| May       | 156  | 0.62    | 0.83 | 1.00 | 1.08   | 1.16    | 1.19 | 1.96 | 3.24    | 43  | 71  | 83  |
| June      | 169  | 0.50    | 0.82 | 1.02 | 1.10   | 1.13    | 1.20 | 1.55 | 2.26    | 37  | 68  | 83  |
| July      | 166  | 0.56    | 0.78 | 0.99 | 1.07   | 1.12    | 1.20 | 1.55 | 2.05    | 46  | 68  | 81  |
| August    | 160  | 0.60    | 0.86 | 1.00 | 1.10   | 1.18    | 1.27 | 1.72 | 3.55    | 40  | 68  | 76  |
| September | 141  | 0.57    | 0.78 | 1.03 | 1.11   | 1.17    | 1.26 | 1.80 | 2.25    | 35  | 64  | 76  |
| October   | 179  | 0.28    | 0.74 | 1.03 | 1.12   | 1.28    | 1.34 | 2.50 | 5.58    | 30  | 51  | 64  |
| November  | 159  | 0.59    | 0.77 | 0.97 | 1.09   | 1.31    | 1.29 | 2.77 | 4.73    | 37  | 60  | 71  |
| December  | 128  | 0.32    | 0.71 | 0.92 | 1.02   | 1.20    | 1.31 | 2.32 | 4.93    | 35  | 52  | 64  |
| Year      | 1910 | 0.28    | 0.73 | 0.94 | 1.07   | 1.15    | 1.20 | 1.90 | 6.11    | 37  | 62  | 75  |

Erythemal Dose [kJ/m<sup>2</sup>] versus Time

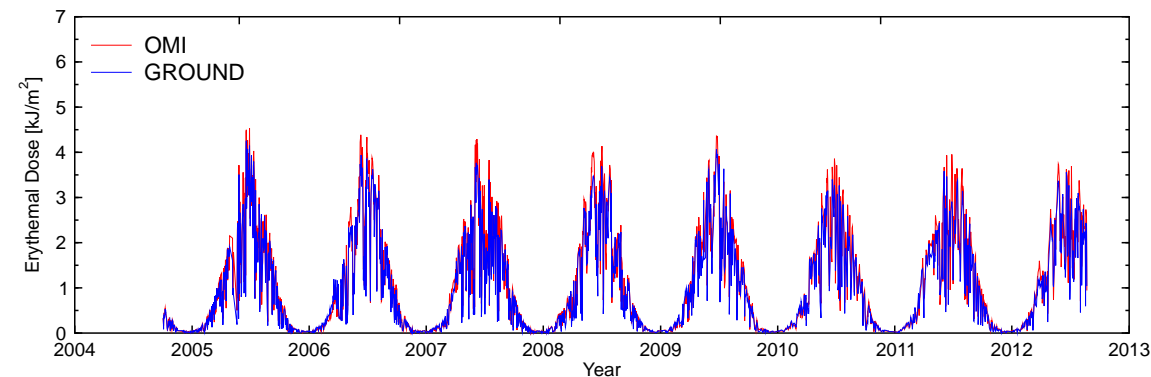

OMI versus Ground

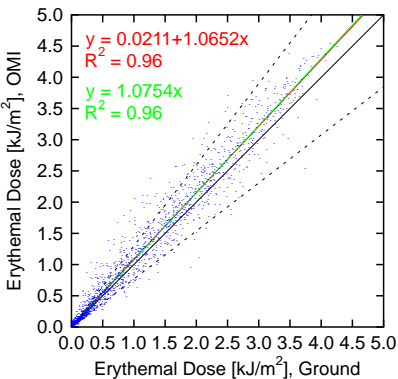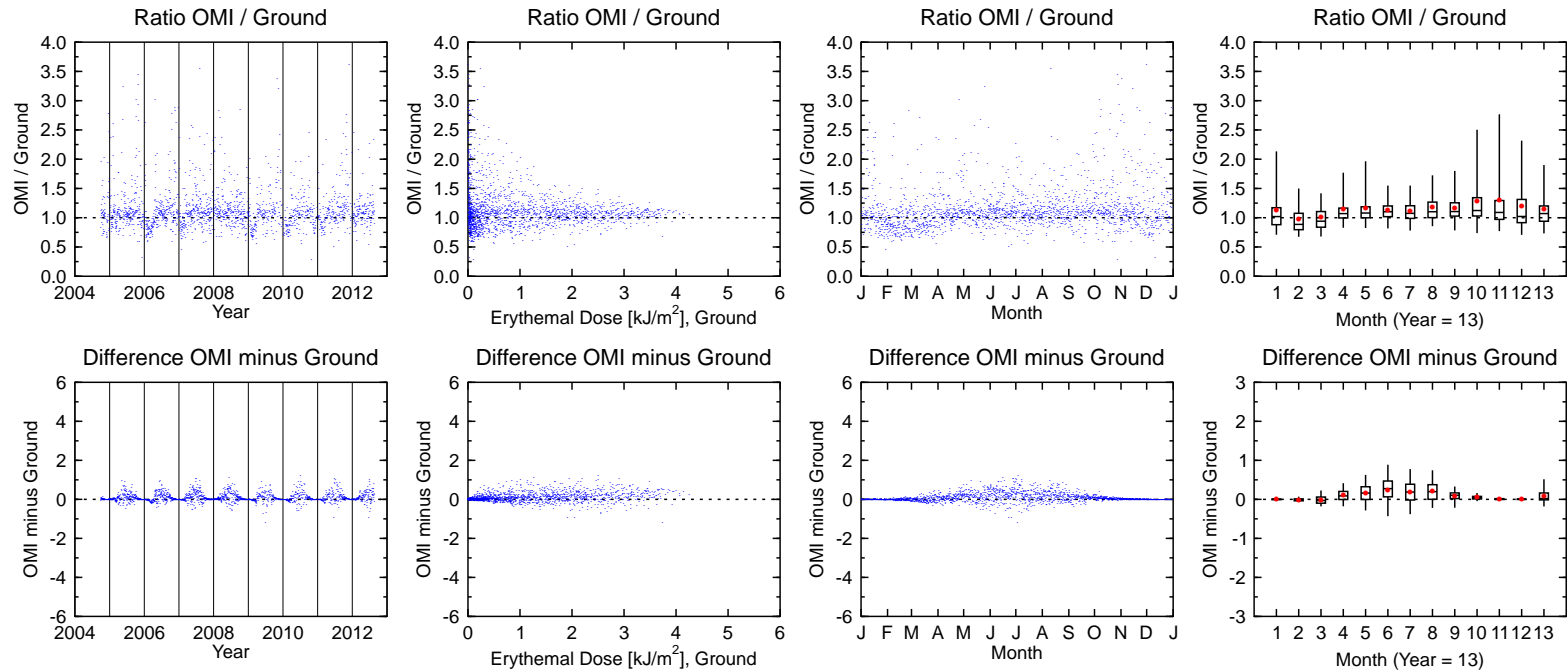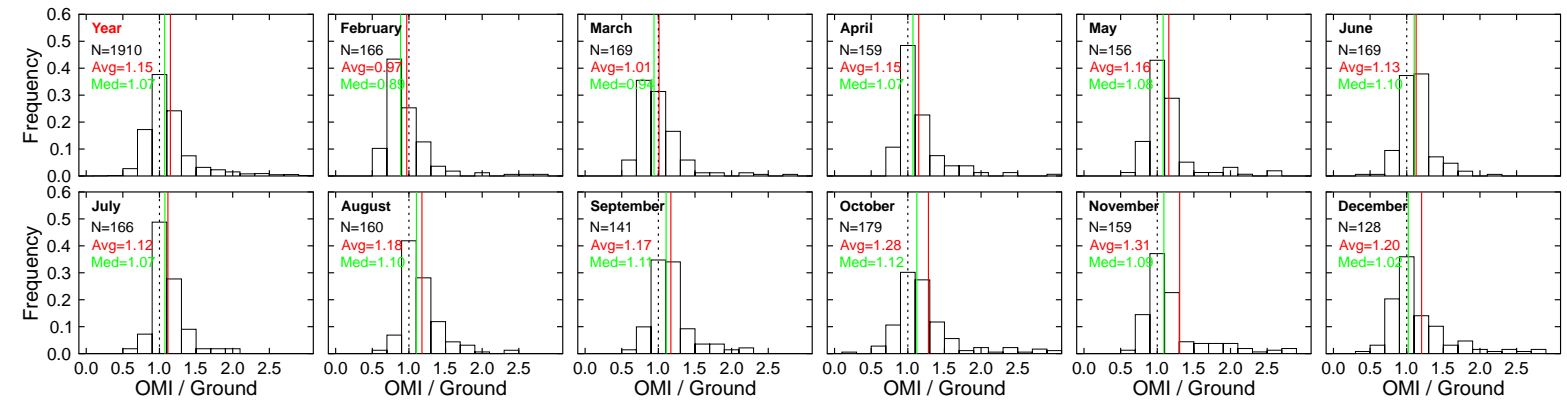

Supplement: Supplementary file 73 [file acp-15-7391-2015-supplement.zip]
