# Supplementary material for: Comparison of OMI UV observations with ground-based measurements at high northern latitudes
Source: Copernicus journal article supplement (doi:10.5194/acp-15-7391-2015), 2015-07-09

Andoya, Norway (69.28°N, 16.01°E)

CSEDRate (Ground at local solar noon), SZA less than 84, Dist less than 12 km

| Month     | N    | Minimum | 5%   | 25%  | Median | Average | 75%  | 95%   | Maximum | W10 | W20 | W30 |
|-----------|------|---------|------|------|--------|---------|------|-------|---------|-----|-----|-----|
| January   | 0    | 0.00    | 0.00 | 0.00 | 0.00   | 0.00    | 0.00 | 0.00  | 0.00    | 0   | 0   | 0   |
| February  | 133  | 0.88    | 0.93 | 1.00 | 1.14   | 1.45    | 1.46 | 2.86  | 11.15   | 38  | 62  | 70  |
| March     | 314  | 0.85    | 0.93 | 1.01 | 1.16   | 1.49    | 1.61 | 2.93  | 7.36    | 41  | 53  | 61  |
| April     | 278  | 0.85    | 0.99 | 1.09 | 1.42   | 1.98    | 1.95 | 4.49  | 20.47   | 26  | 31  | 38  |
| May       | 258  | 0.97    | 1.05 | 1.20 | 1.92   | 3.10    | 3.51 | 9.15  | 16.19   | 13  | 25  | 30  |
| June      | 238  | 1.01    | 1.07 | 1.26 | 1.79   | 2.60    | 3.23 | 7.18  | 13.67   | 10  | 22  | 26  |
| July      | 276  | 0.97    | 1.05 | 1.32 | 2.06   | 3.34    | 3.52 | 10.49 | 24.22   | 9   | 19  | 24  |
| August    | 282  | 0.96    | 1.05 | 1.19 | 1.70   | 2.58    | 2.66 | 6.01  | 26.08   | 12  | 28  | 33  |
| September | 255  | 1.01    | 1.10 | 1.35 | 1.83   | 2.79    | 3.11 | 7.56  | 17.76   | 4   | 15  | 19  |
| October   | 260  | 0.86    | 1.02 | 1.25 | 1.78   | 2.67    | 3.80 | 7.43  | 9.33    | 13  | 22  | 29  |
| November  | 5    | 1.02    | 1.02 | 1.31 | 1.70   | 4.21    | 2.03 | 14.98 | 14.98   | 20  | 20  | 20  |
| December  | 0    | 0.00    | 0.00 | 0.00 | 0.00   | 0.00    | 0.00 | 0.00  | 0.00    | 0   | 0   | 0   |
| Year      | 2299 | 0.85    | 0.99 | 1.15 | 1.57   | 2.48    | 2.71 | 6.58  | 26.08   | 18  | 30  | 35  |

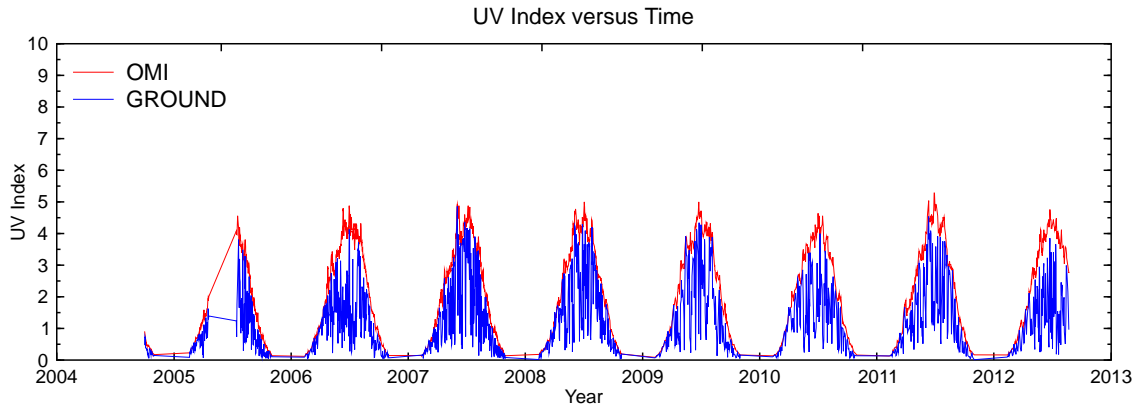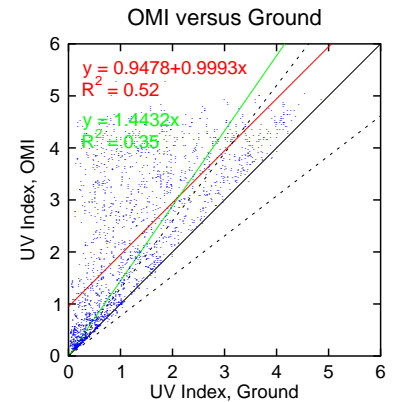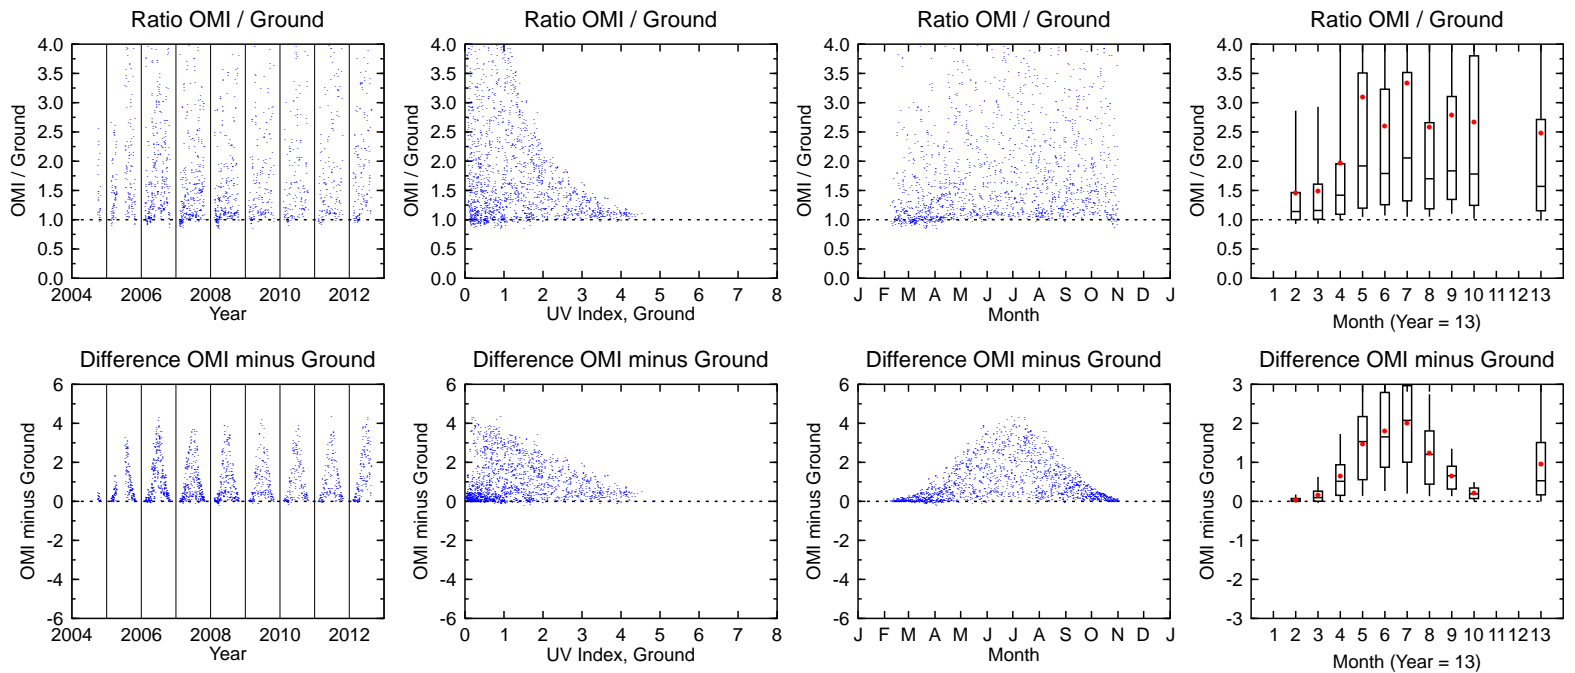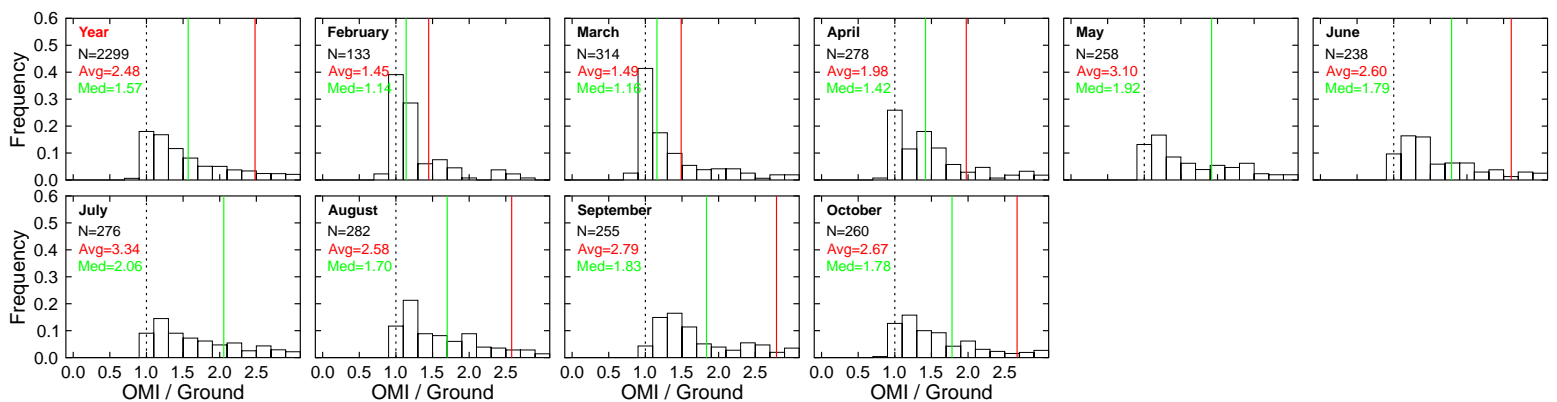

Supplement: Supplementary file 74 [file acp-15-7391-2015-supplement.zip]
