# Supplementary material for: Comparison of OMI UV observations with ground-based measurements at high northern latitudes
Source: Copernicus journal article supplement (doi:10.5194/acp-15-7391-2015), 2015-07-09
Supplement: Supplementary file 75 [file acp-15-7391-2015-supplement.zip]

Barrow, Alaska (71.32°N, 156.68°E)

EDRate (Ground at local solar noon), SZA less than 84, Dist less than 12 km

| Month     | N    | Minimum | 5%   | 25%  | Median | Average | 75%  | 95%  | Maximum | W10 | W20 | W30 |
|-----------|------|---------|------|------|--------|---------|------|------|---------|-----|-----|-----|
| January   | 0    | 0.00    | 0.00 | 0.00 | 0.00   | 0.00    | 0.00 | 0.00 | 0.00    | 0   | 0   | 0   |
| February  | 54   | 0.90    | 0.91 | 0.98 | 1.01   | 1.04    | 1.08 | 1.30 | 1.60    | 83  | 94  | 96  |
| March     | 171  | 0.70    | 0.91 | 0.99 | 1.02   | 1.04    | 1.08 | 1.20 | 1.56    | 78  | 95  | 96  |
| April     | 169  | 0.79    | 0.93 | 1.04 | 1.10   | 1.14    | 1.20 | 1.49 | 2.07    | 49  | 73  | 86  |
| May       | 188  | 0.55    | 0.93 | 1.11 | 1.18   | 1.22    | 1.32 | 1.57 | 3.21    | 20  | 52  | 71  |
| June      | 317  | 0.26    | 0.56 | 0.87 | 1.03   | 1.03    | 1.16 | 1.49 | 2.17    | 35  | 58  | 74  |
| July      | 274  | 0.45    | 0.71 | 0.94 | 1.11   | 1.12    | 1.24 | 1.69 | 3.36    | 27  | 57  | 73  |
| August    | 279  | 0.57    | 0.82 | 1.05 | 1.16   | 1.23    | 1.30 | 1.93 | 4.01    | 30  | 56  | 72  |
| September | 285  | 0.63    | 1.00 | 1.20 | 1.38   | 1.47    | 1.66 | 2.14 | 4.00    | 10  | 25  | 39  |
| October   | 206  | 0.97    | 1.20 | 1.36 | 1.59   | 1.70    | 1.96 | 2.65 | 3.38    | 1   | 5   | 17  |
| November  | 0    | 0.00    | 0.00 | 0.00 | 0.00   | 0.00    | 0.00 | 0.00 | 0.00    | 0   | 0   | 0   |
| December  | 0    | 0.00    | 0.00 | 0.00 | 0.00   | 0.00    | 0.00 | 0.00 | 0.00    | 0   | 0   | 0   |
| Year      | 1943 | 0.26    | 0.80 | 1.02 | 1.14   | 1.24    | 1.36 | 1.99 | 4.01    | 31  | 52  | 66  |

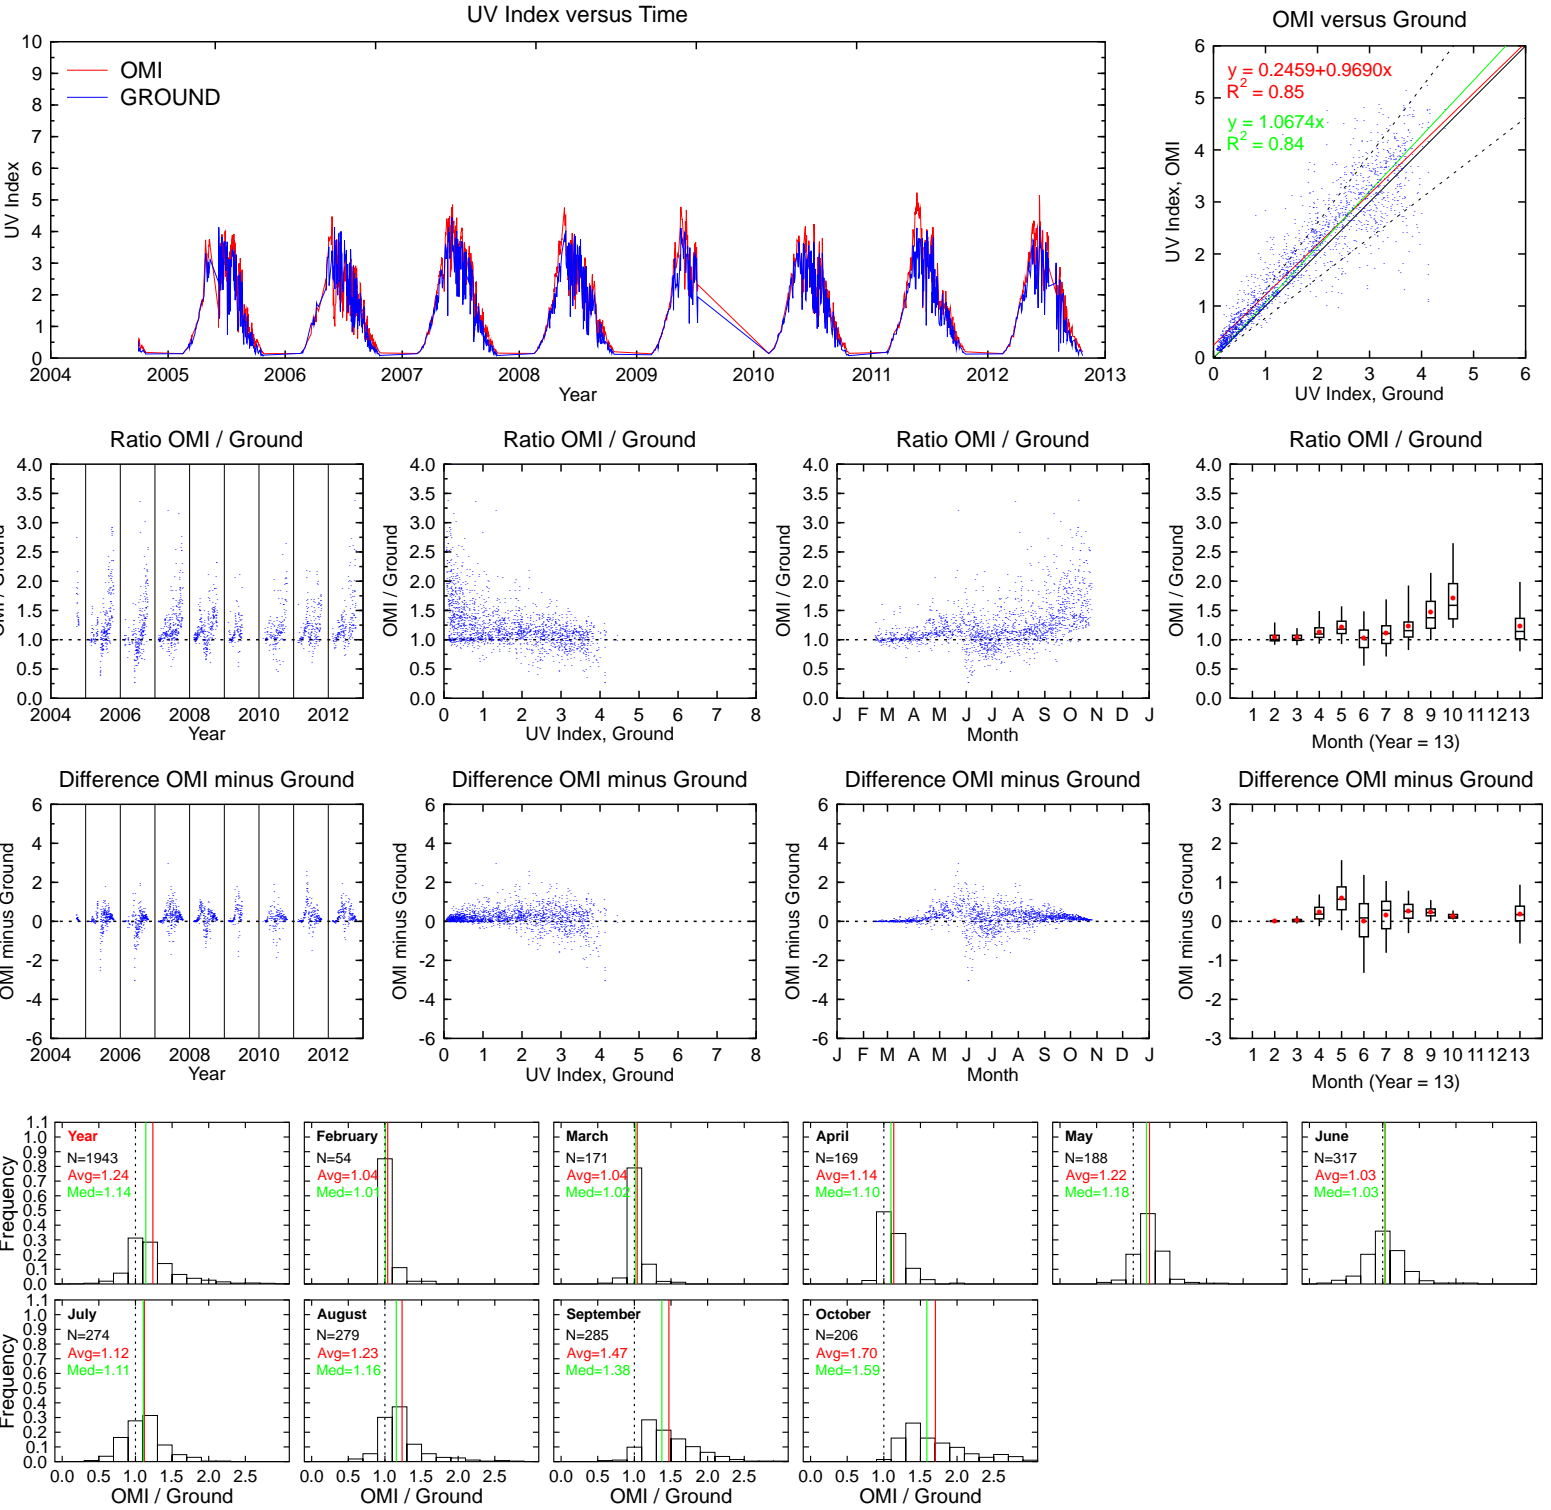

Ratio OMI / Ground

Frequency
