# Supplementary material for: Comparison of OMI UV observations with ground-based measurements at high northern latitudes
Source: Copernicus journal article supplement (doi:10.5194/acp-15-7391-2015), 2015-07-09

Blindern, Norway (59.94°N, 10.72°E)  
EDDose, all data

| Month     | N    | Minimum | 5%   | 25%  | Median | Average | 75%  | 95%  | Maximum | W10 | W20 | W30 |
|-----------|------|---------|------|------|--------|---------|------|------|---------|-----|-----|-----|
| January   | 217  | 0.67    | 0.74 | 0.92 | 1.07   | 1.25    | 1.37 | 2.36 | 4.15    | 27  | 52  | 64  |
| February  | 207  | 0.65    | 0.75 | 0.88 | 0.99   | 1.12    | 1.20 | 2.23 | 3.36    | 30  | 57  | 74  |
| March     | 237  | 0.44    | 0.77 | 0.91 | 1.06   | 1.16    | 1.26 | 1.98 | 4.35    | 30  | 59  | 73  |
| April     | 229  | 0.79    | 0.90 | 1.05 | 1.11   | 1.23    | 1.28 | 2.03 | 3.88    | 38  | 66  | 76  |
| May       | 210  | 0.62    | 0.81 | 0.99 | 1.06   | 1.10    | 1.15 | 1.57 | 2.37    | 51  | 77  | 88  |
| June      | 192  | 0.69    | 0.86 | 1.05 | 1.13   | 1.17    | 1.21 | 1.69 | 3.49    | 34  | 69  | 84  |
| July      | 233  | 0.58    | 0.89 | 1.02 | 1.09   | 1.13    | 1.19 | 1.55 | 2.09    | 47  | 74  | 83  |
| August    | 227  | 0.53    | 0.88 | 1.02 | 1.12   | 1.17    | 1.23 | 1.75 | 2.78    | 36  | 67  | 81  |
| September | 200  | 0.67    | 0.93 | 1.06 | 1.12   | 1.20    | 1.23 | 1.82 | 2.25    | 38  | 66  | 78  |
| October   | 237  | 0.58    | 0.87 | 1.06 | 1.14   | 1.36    | 1.39 | 2.64 | 6.52    | 29  | 59  | 68  |
| November  | 214  | 0.48    | 0.84 | 1.02 | 1.14   | 1.42    | 1.68 | 2.77 | 4.39    | 35  | 53  | 66  |
| December  | 205  | 0.27    | 0.74 | 0.93 | 1.10   | 1.27    | 1.39 | 2.33 | 5.25    | 31  | 52  | 63  |
| Year      | 2608 | 0.27    | 0.81 | 0.99 | 1.10   | 1.22    | 1.26 | 2.09 | 6.52    | 36  | 63  | 75  |

Erythemal Dose [kJ/m<sup>2</sup>] versus Time

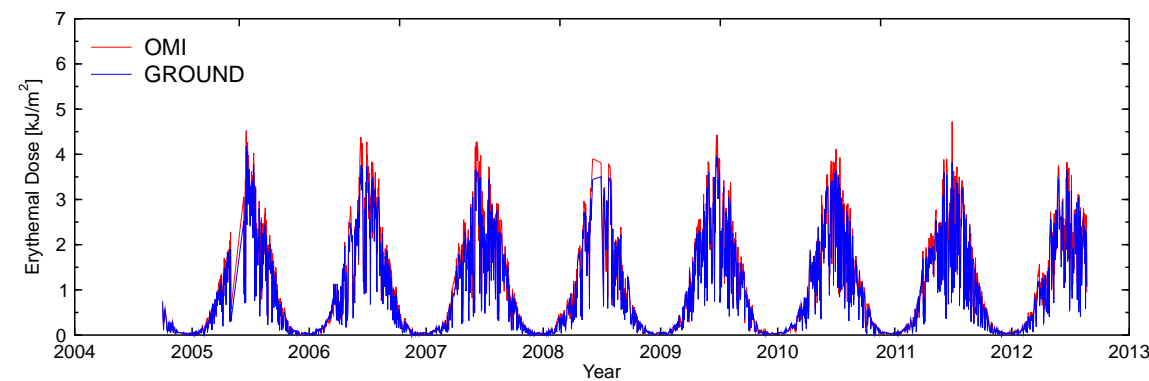

OMI versus Ground

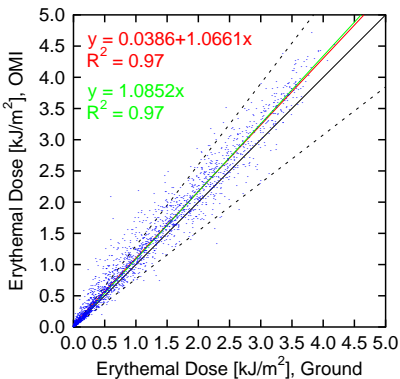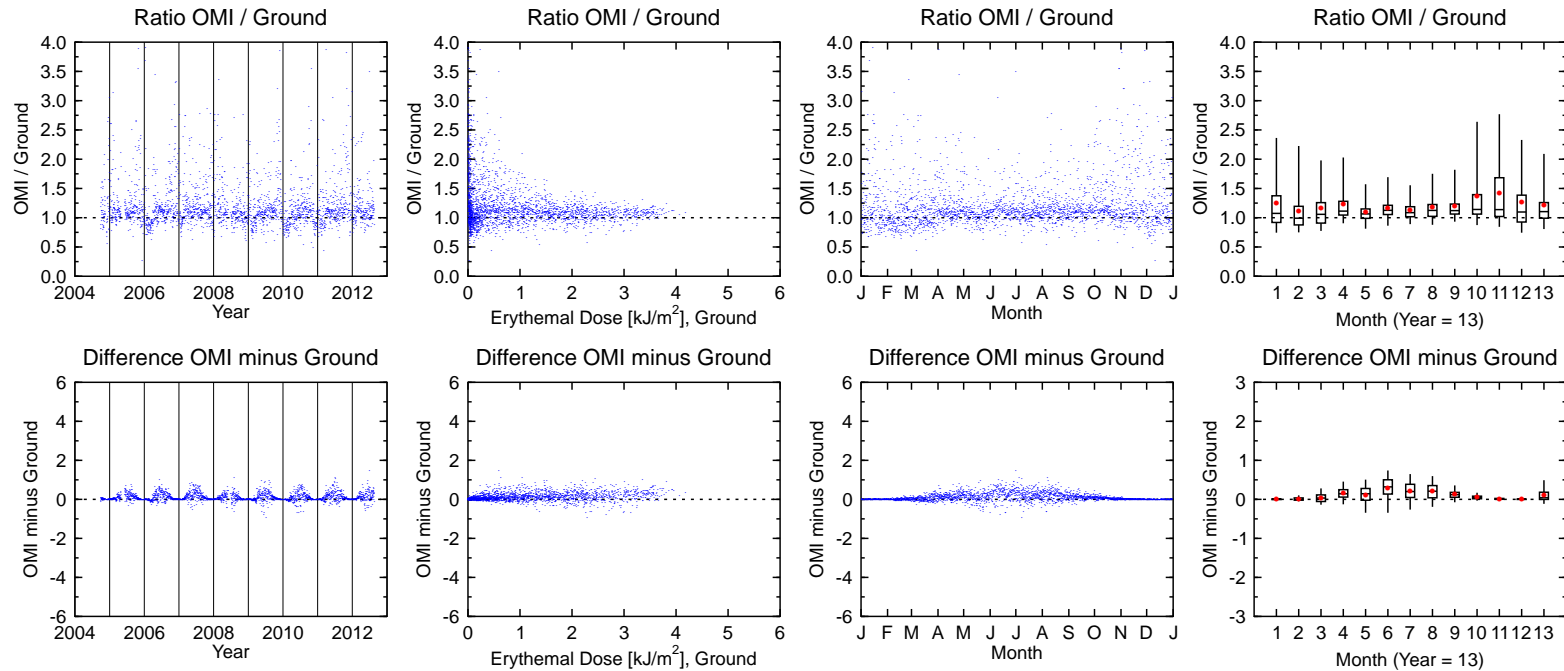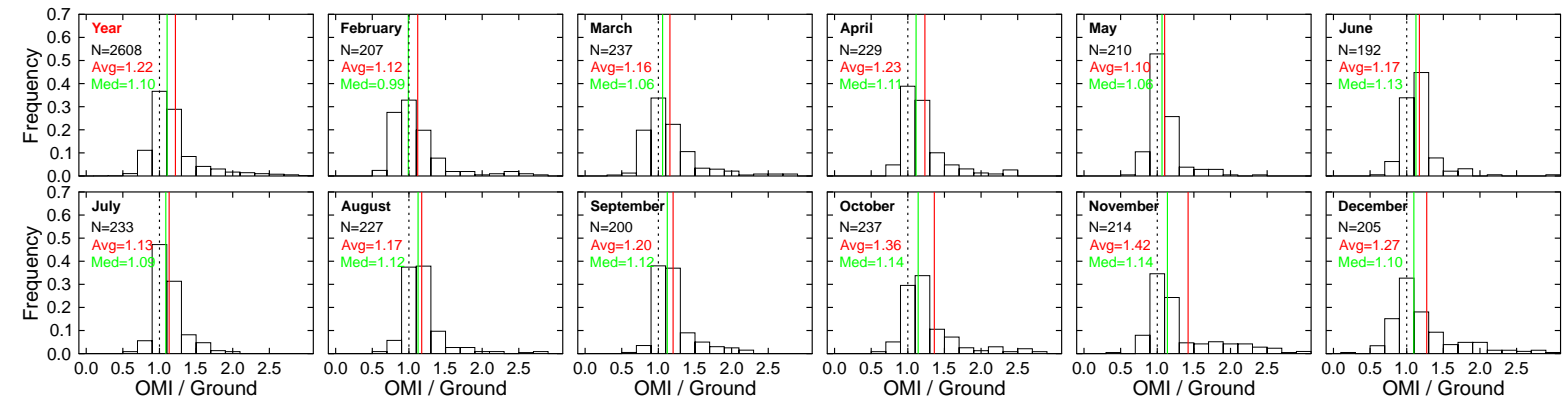

Supplement: Supplementary file 77 [file acp-15-7391-2015-supplement.zip]
