# Supplementary material for: Comparison of OMI UV observations with ground-based measurements at high northern latitudes
Source: Copernicus journal article supplement (doi:10.5194/acp-15-7391-2015), 2015-07-09

Jokioinen, Finland (60.82°N, 23.5°E)  
CSEDDose, SZA less than 84, Dist less than 12 km

| Month     | N    | Minimum | 5%   | 25%  | Median | Average | 75%  | 95%  | Maximum | W10 | W20 | W30 |
|-----------|------|---------|------|------|--------|---------|------|------|---------|-----|-----|-----|
| January   | 135  | 0.84    | 0.89 | 1.06 | 1.31   | 1.76    | 1.90 | 4.38 | 8.14    | 27  | 41  | 50  |
| February  | 125  | 0.91    | 0.95 | 1.03 | 1.32   | 1.58    | 1.86 | 2.98 | 5.09    | 34  | 44  | 47  |
| March     | 121  | 0.94    | 0.97 | 1.04 | 1.30   | 1.53    | 1.91 | 2.69 | 4.87    | 31  | 41  | 50  |
| April     | 145  | 1.07    | 1.09 | 1.19 | 1.46   | 1.81    | 1.99 | 3.53 | 8.67    | 6   | 28  | 37  |
| May       | 162  | 1.07    | 1.11 | 1.20 | 1.41   | 1.69    | 1.80 | 3.56 | 6.00    | 3   | 26  | 43  |
| June      | 142  | 1.09    | 1.11 | 1.19 | 1.35   | 1.84    | 2.05 | 4.15 | 8.38    | 3   | 26  | 46  |
| July      | 164  | 1.05    | 1.12 | 1.21 | 1.41   | 1.63    | 1.82 | 2.83 | 4.91    | 1   | 23  | 37  |
| August    | 162  | 1.06    | 1.13 | 1.26 | 1.50   | 1.76    | 1.87 | 3.74 | 6.34    | 1   | 15  | 31  |
| September | 135  | 1.09    | 1.14 | 1.30 | 1.58   | 1.94    | 2.30 | 4.18 | 4.85    | 1   | 13  | 26  |
| October   | 168  | 1.08    | 1.13 | 1.30 | 1.70   | 2.33    | 2.74 | 5.29 | 8.47    | 1   | 15  | 25  |
| November  | 121  | 0.90    | 0.99 | 1.24 | 1.91   | 2.42    | 2.73 | 6.24 | 11.11   | 13  | 21  | 28  |
| December  | 49   | 0.90    | 0.91 | 1.19 | 1.83   | 2.19    | 2.40 | 5.31 | 11.19   | 6   | 27  | 31  |
| Year      | 1629 | 0.84    | 1.01 | 1.19 | 1.45   | 1.85    | 2.06 | 4.18 | 11.19   | 10  | 26  | 38  |

Erythemal Dose [kJ/m<sup>2</sup>] versus Time

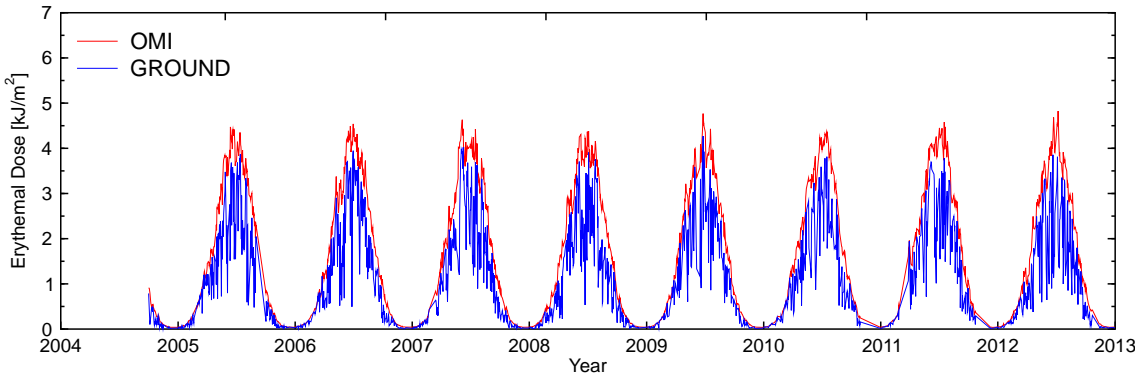

OMI versus Ground

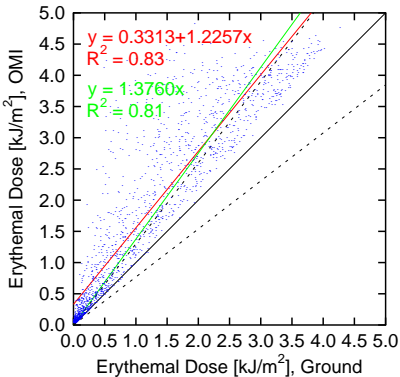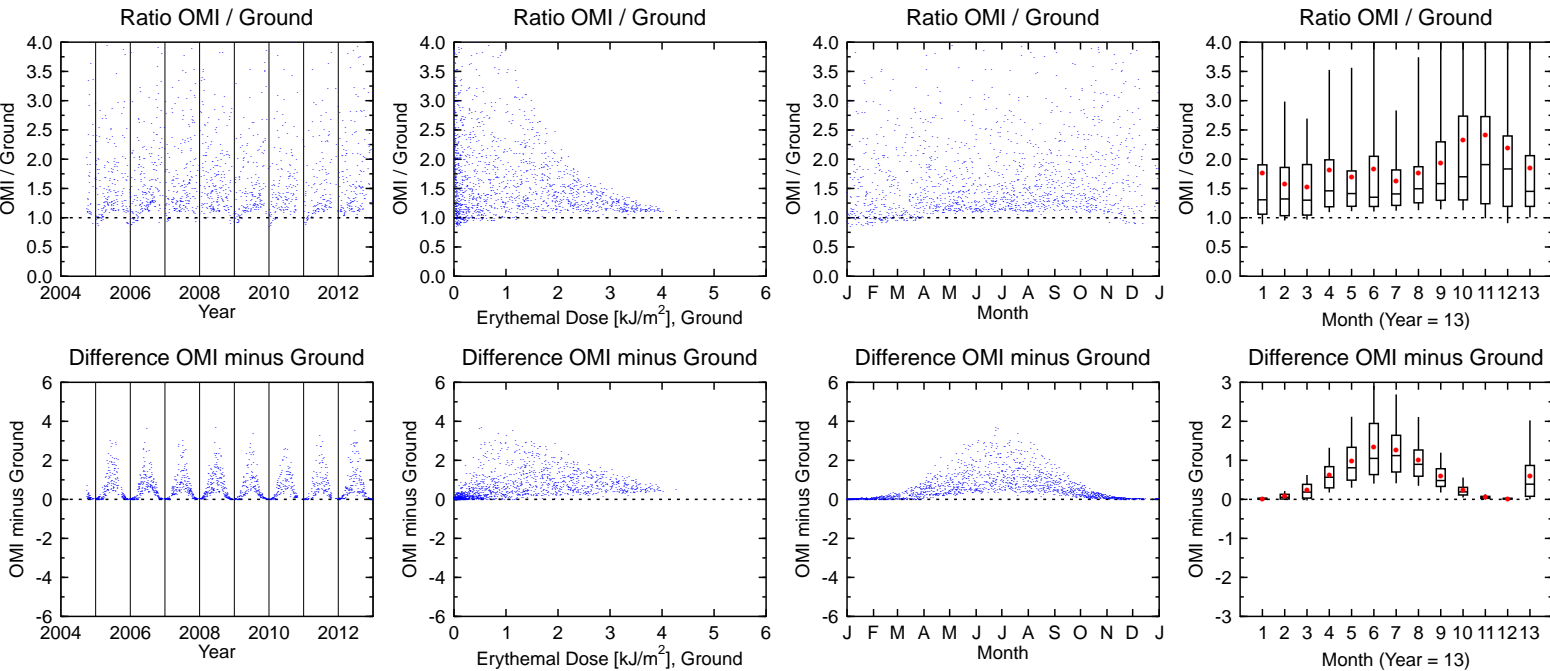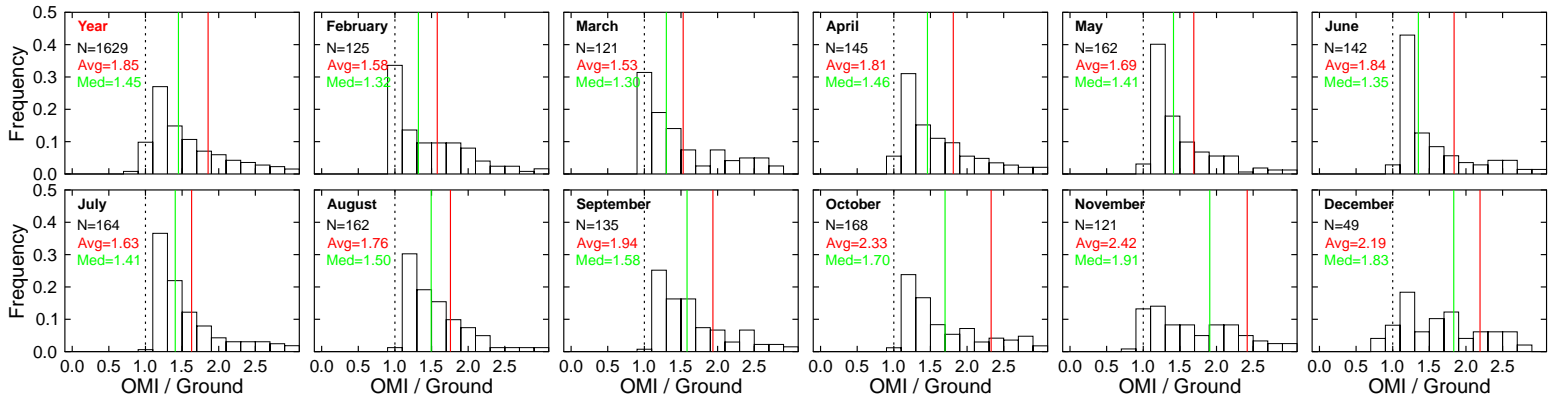

Supplement: Supplementary file 78 [file acp-15-7391-2015-supplement.zip]
