# Supplementary material for: Comparison of OMI UV observations with ground-based measurements at high northern latitudes
Source: Copernicus journal article supplement (doi:10.5194/acp-15-7391-2015), 2015-07-09

Resolute, Canada (74.72°N, 94.98°E)

CSEDRate (Ground at local solar noon), SZA less than 84, Dist less than 12 km

| Month     | N    | Minimum | 5%   | 25%  | Median | Average | 75%  | 95%  | Maximum | W10 | W20 | W30 |
|-----------|------|---------|------|------|--------|---------|------|------|---------|-----|-----|-----|
| January   | 0    | 0.00    | 0.00 | 0.00 | 0.00   | 0.00    | 0.00 | 0.00 | 0.00    | 0   | 0   | 0   |
| February  | 4    | 1.11    | 1.11 | 1.12 | 1.19   | 1.20    | 1.26 | 1.30 | 1.30    | 0   | 50  | 75  |
| March     | 80   | 0.99    | 1.02 | 1.06 | 1.10   | 1.12    | 1.15 | 1.25 | 1.41    | 51  | 89  | 98  |
| April     | 101  | 0.97    | 1.02 | 1.06 | 1.09   | 1.10    | 1.12 | 1.21 | 1.47    | 54  | 92  | 98  |
| May       | 88   | 0.97    | 1.01 | 1.09 | 1.15   | 1.18    | 1.23 | 1.51 | 2.45    | 30  | 65  | 86  |
| June      | 146  | 0.99    | 1.16 | 1.27 | 1.38   | 1.69    | 1.81 | 3.16 | 8.52    | 2   | 13  | 29  |
| July      | 150  | 1.11    | 1.14 | 1.21 | 1.30   | 1.58    | 1.60 | 2.73 | 9.99    | 0   | 21  | 51  |
| August    | 210  | 0.84    | 1.16 | 1.26 | 1.56   | 2.10    | 2.46 | 4.60 | 8.12    | 2   | 8   | 32  |
| September | 184  | 0.99    | 1.04 | 1.20 | 1.33   | 1.61    | 1.83 | 2.86 | 4.86    | 11  | 26  | 43  |
| October   | 42   | 1.00    | 1.03 | 1.13 | 1.19   | 1.25    | 1.34 | 1.75 | 1.78    | 19  | 55  | 71  |
| November  | 0    | 0.00    | 0.00 | 0.00 | 0.00   | 0.00    | 0.00 | 0.00 | 0.00    | 0   | 0   | 0   |
| December  | 0    | 0.00    | 0.00 | 0.00 | 0.00   | 0.00    | 0.00 | 0.00 | 0.00    | 0   | 0   | 0   |
| Year      | 1005 | 0.84    | 1.03 | 1.14 | 1.26   | 1.57    | 1.61 | 3.10 | 9.99    | 16  | 36  | 55  |

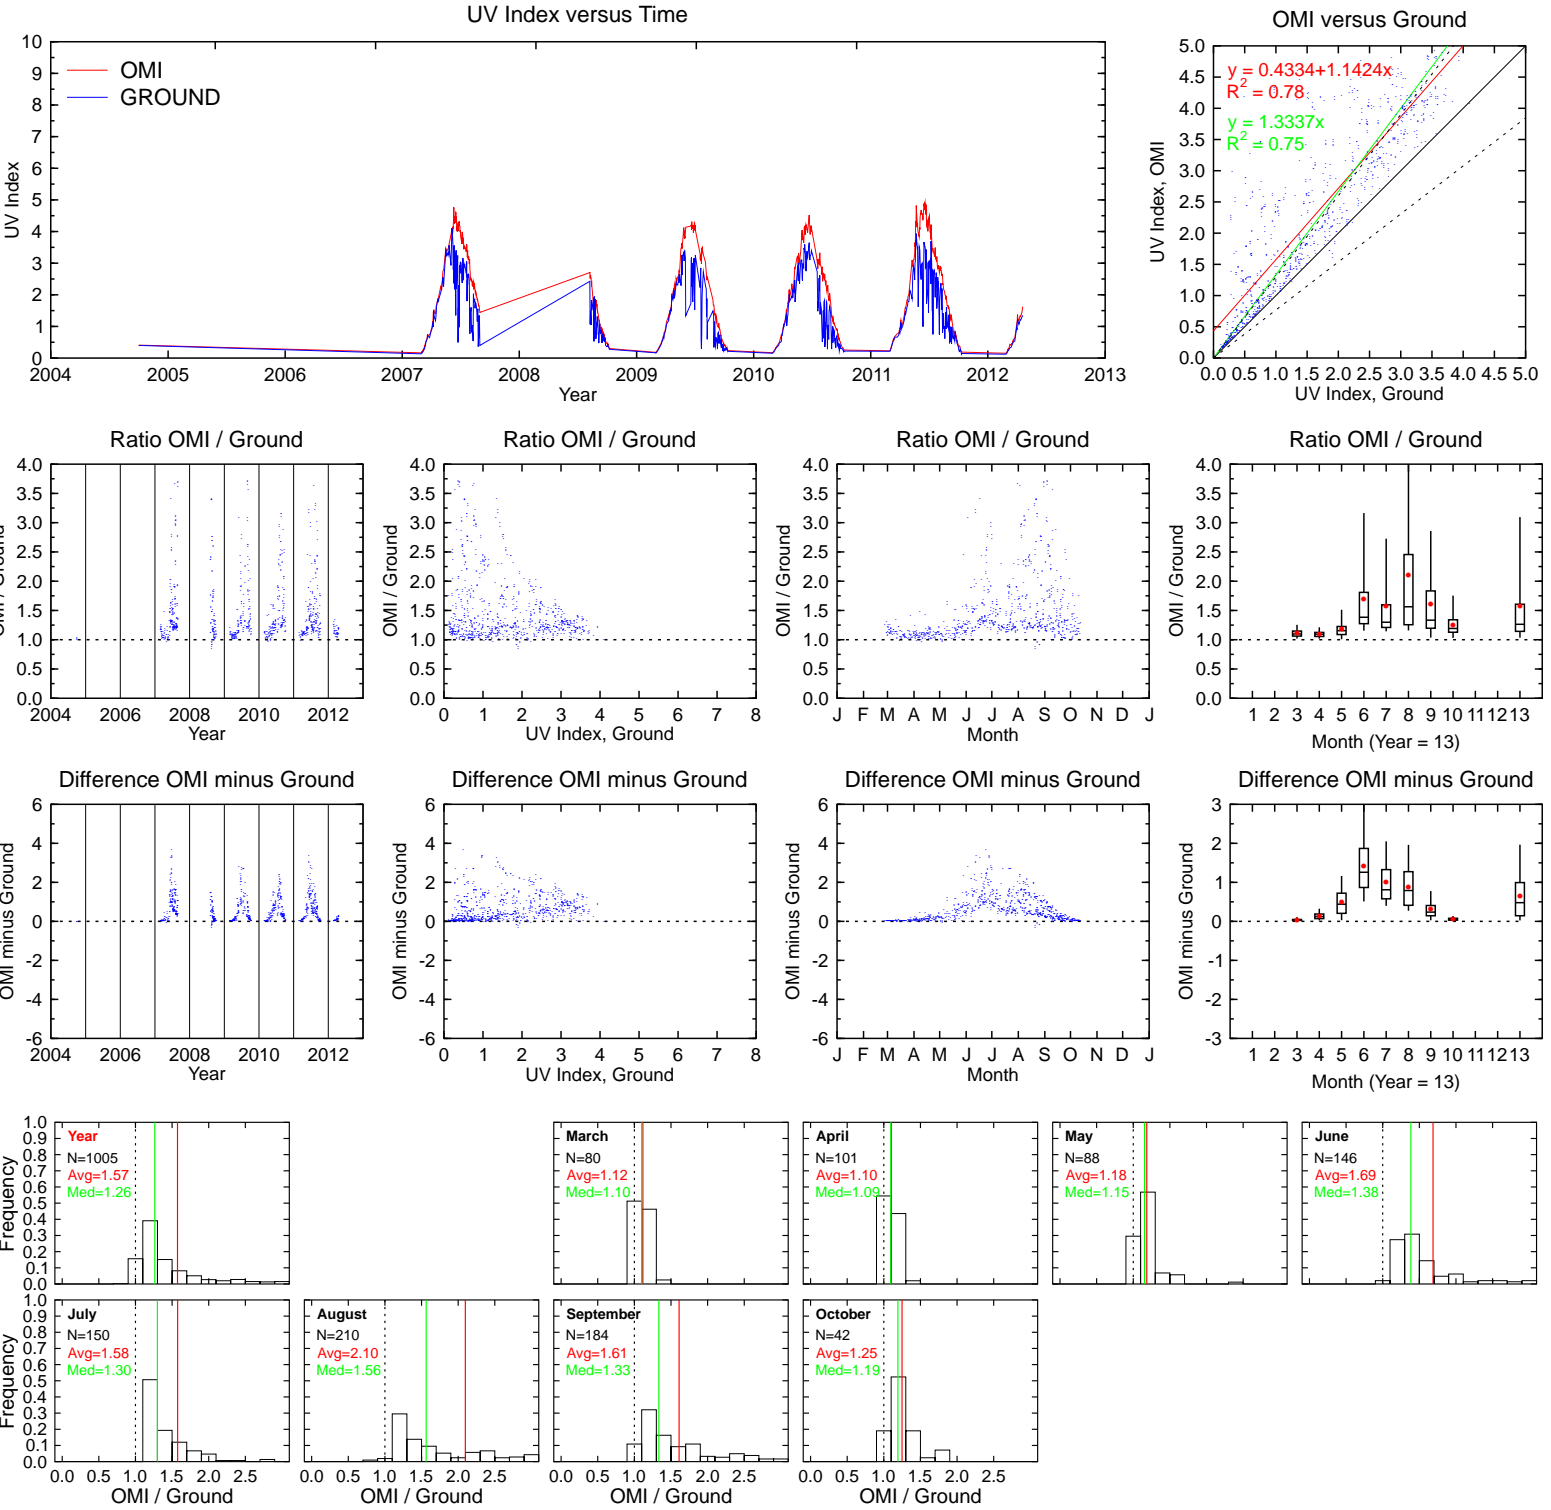

Supplement: Supplementary file 79 [file acp-15-7391-2015-supplement.zip]
