# Supplementary material for: Comparison of OMI UV observations with ground-based measurements at high northern latitudes
Source: Copernicus journal article supplement (doi:10.5194/acp-15-7391-2015), 2015-07-09

Barrow, Alaska (71.32°N, 156.68°E)

OPEDRate, SZA less than 84, Dist less than 12 km

| Month     | N    | Minimum | 5%   | 25%  | Median | Average | 75%  | 95%  | Maximum | W10 | W20 | W30 |
|-----------|------|---------|------|------|--------|---------|------|------|---------|-----|-----|-----|
| January   | 0    | 0.00    | 0.00 | 0.00 | 0.00   | 0.00    | 0.00 | 0.00 | 0.00    | 0   | 0   | 0   |
| February  | 51   | 0.95    | 1.00 | 1.08 | 1.11   | 1.14    | 1.17 | 1.37 | 1.89    | 47  | 80  | 92  |
| March     | 166  | 0.87    | 1.00 | 1.05 | 1.09   | 1.10    | 1.12 | 1.27 | 1.55    | 59  | 90  | 96  |
| April     | 166  | 0.80    | 0.94 | 1.09 | 1.15   | 1.16    | 1.21 | 1.44 | 1.64    | 29  | 70  | 84  |
| May       | 185  | 0.57    | 0.93 | 1.12 | 1.21   | 1.23    | 1.33 | 1.59 | 2.15    | 19  | 44  | 67  |
| June      | 309  | 0.27    | 0.63 | 0.87 | 1.02   | 1.03    | 1.17 | 1.42 | 2.27    | 34  | 60  | 78  |
| July      | 277  | 0.64    | 0.82 | 0.97 | 1.08   | 1.11    | 1.17 | 1.53 | 3.80    | 40  | 71  | 84  |
| August    | 274  | 0.62    | 0.91 | 1.06 | 1.14   | 1.18    | 1.26 | 1.49 | 3.90    | 32  | 62  | 81  |
| September | 282  | 0.77    | 1.00 | 1.19 | 1.37   | 1.41    | 1.57 | 1.94 | 4.08    | 13  | 26  | 43  |
| October   | 203  | 0.89    | 1.16 | 1.30 | 1.49   | 1.59    | 1.79 | 2.36 | 3.33    | 2   | 9   | 25  |
| November  | 0    | 0.00    | 0.00 | 0.00 | 0.00   | 0.00    | 0.00 | 0.00 | 0.00    | 0   | 0   | 0   |
| December  | 0    | 0.00    | 0.00 | 0.00 | 0.00   | 0.00    | 0.00 | 0.00 | 0.00    | 0   | 0   | 0   |
| Year      | 1913 | 0.27    | 0.84 | 1.05 | 1.15   | 1.22    | 1.33 | 1.79 | 4.08    | 29  | 54  | 70  |

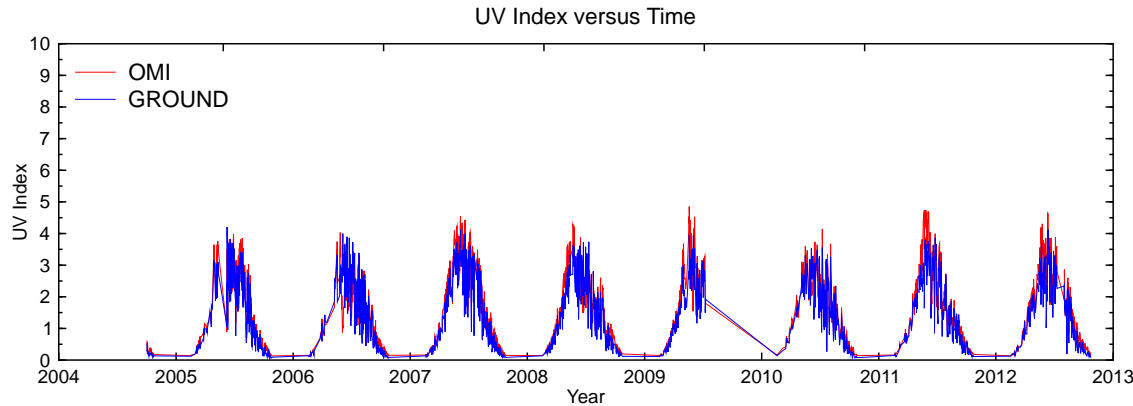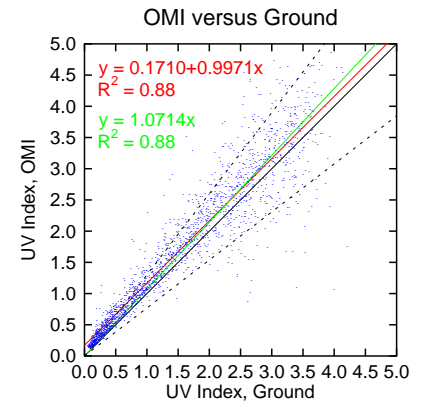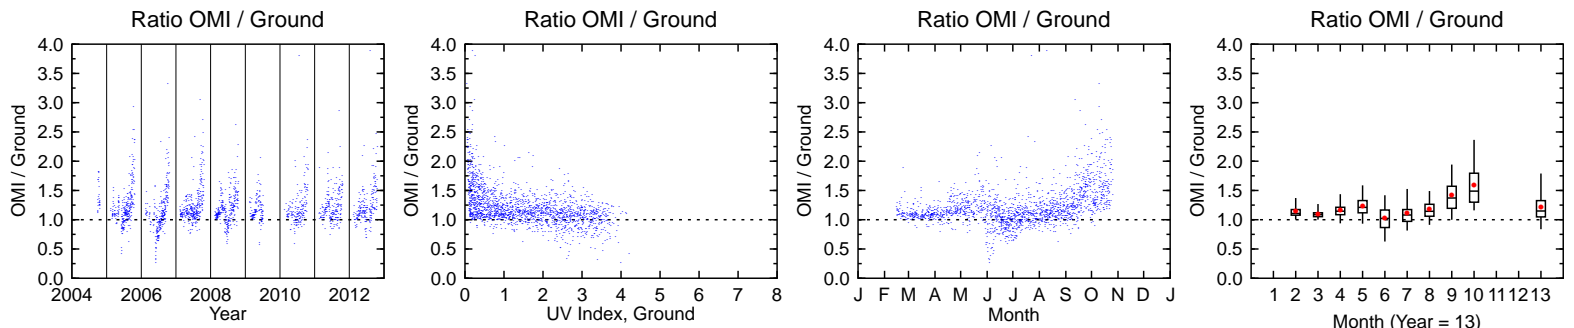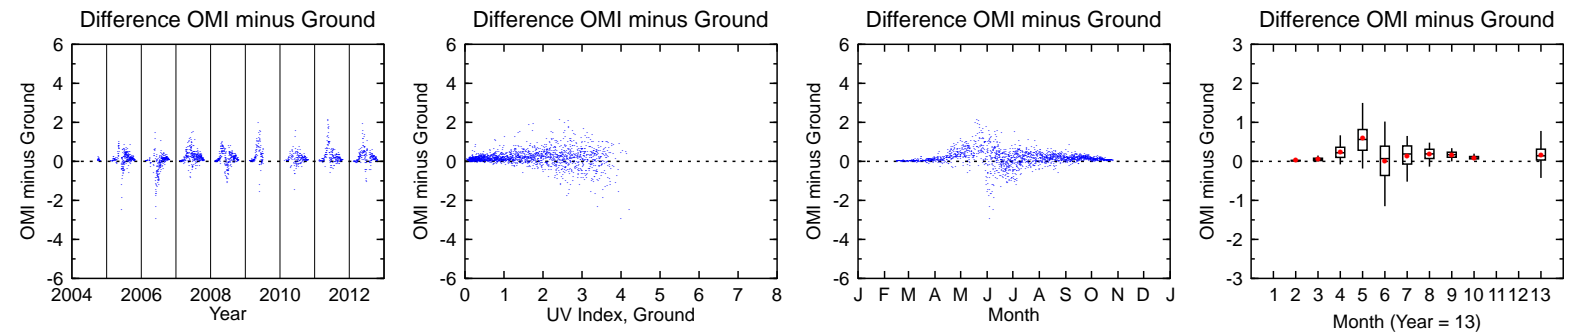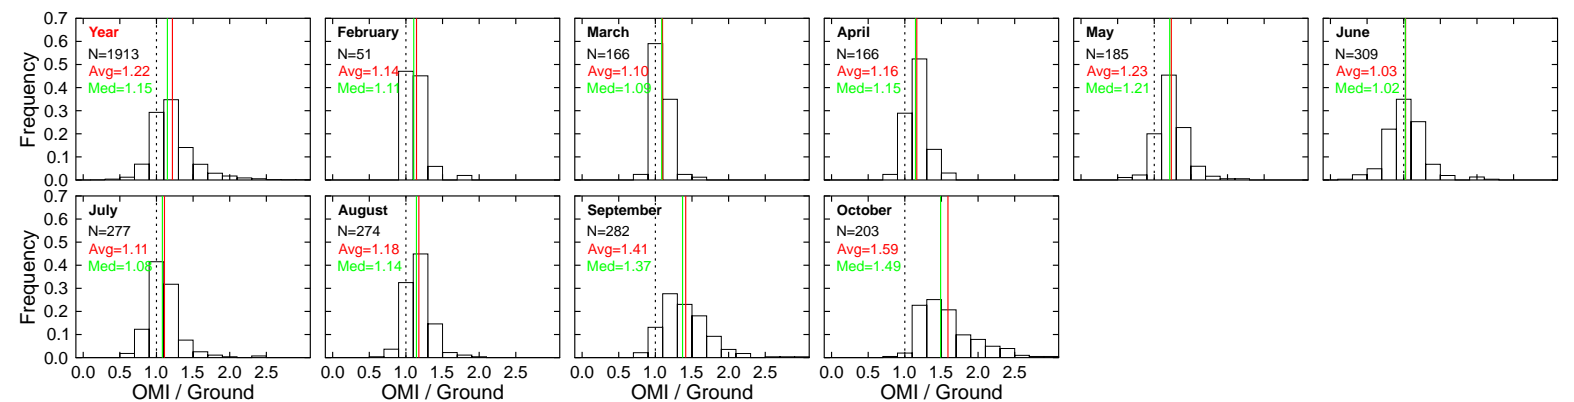

Supplement: Supplementary file 80 [file acp-15-7391-2015-supplement.zip]
