# Supplementary material for: Comparison of OMI UV observations with ground-based measurements at high northern latitudes
Source: Copernicus journal article supplement (doi:10.5194/acp-15-7391-2015), 2015-07-09

Blindern, Norway (59.94°N, 10.72°E)

CSEDRate (Ground at local solar noon), SZA less than 84, Dist less than 12 km

| Month     | N    | Minimum | 5%   | 25%  | Median | Average | 75%  | 95%   | Maximum | W10 | W20 | W30 |
|-----------|------|---------|------|------|--------|---------|------|-------|---------|-----|-----|-----|
| January   | 196  | 0.97    | 1.03 | 1.13 | 1.65   | 2.77    | 2.77 | 8.20  | 19.94   | 22  | 32  | 37  |
| February  | 201  | 0.94    | 1.03 | 1.15 | 1.44   | 2.16    | 1.89 | 6.24  | 20.45   | 18  | 32  | 40  |
| March     | 208  | 0.99    | 1.02 | 1.11 | 1.32   | 2.01    | 2.08 | 5.97  | 16.42   | 22  | 42  | 49  |
| April     | 200  | 1.07    | 1.10 | 1.16 | 1.37   | 2.59    | 2.88 | 7.71  | 18.40   | 6   | 38  | 47  |
| May       | 177  | 0.99    | 1.09 | 1.18 | 1.49   | 2.67    | 2.61 | 7.06  | 40.94   | 8   | 29  | 41  |
| June      | 199  | 1.01    | 1.09 | 1.19 | 1.37   | 3.07    | 2.39 | 9.67  | 46.98   | 6   | 29  | 45  |
| July      | 211  | 1.05    | 1.13 | 1.23 | 1.89   | 3.23    | 3.27 | 7.99  | 39.90   | 3   | 17  | 33  |
| August    | 196  | 1.01    | 1.12 | 1.21 | 1.74   | 2.91    | 2.81 | 9.16  | 45.49   | 2   | 24  | 35  |
| September | 173  | 1.08    | 1.12 | 1.18 | 1.45   | 2.85    | 2.83 | 9.88  | 30.38   | 2   | 31  | 42  |
| October   | 224  | 1.08    | 1.14 | 1.23 | 1.66   | 3.55    | 3.86 | 15.24 | 30.09   | 1   | 16  | 37  |
| November  | 200  | 0.97    | 1.09 | 1.16 | 1.44   | 3.38    | 3.20 | 14.36 | 23.67   | 7   | 34  | 42  |
| December  | 131  | 0.95    | 1.01 | 1.12 | 1.41   | 2.83    | 3.24 | 10.51 | 17.02   | 22  | 36  | 42  |
| Year      | 2316 | 0.94    | 1.06 | 1.17 | 1.50   | 2.84    | 2.76 | 8.75  | 46.98   | 9   | 30  | 41  |

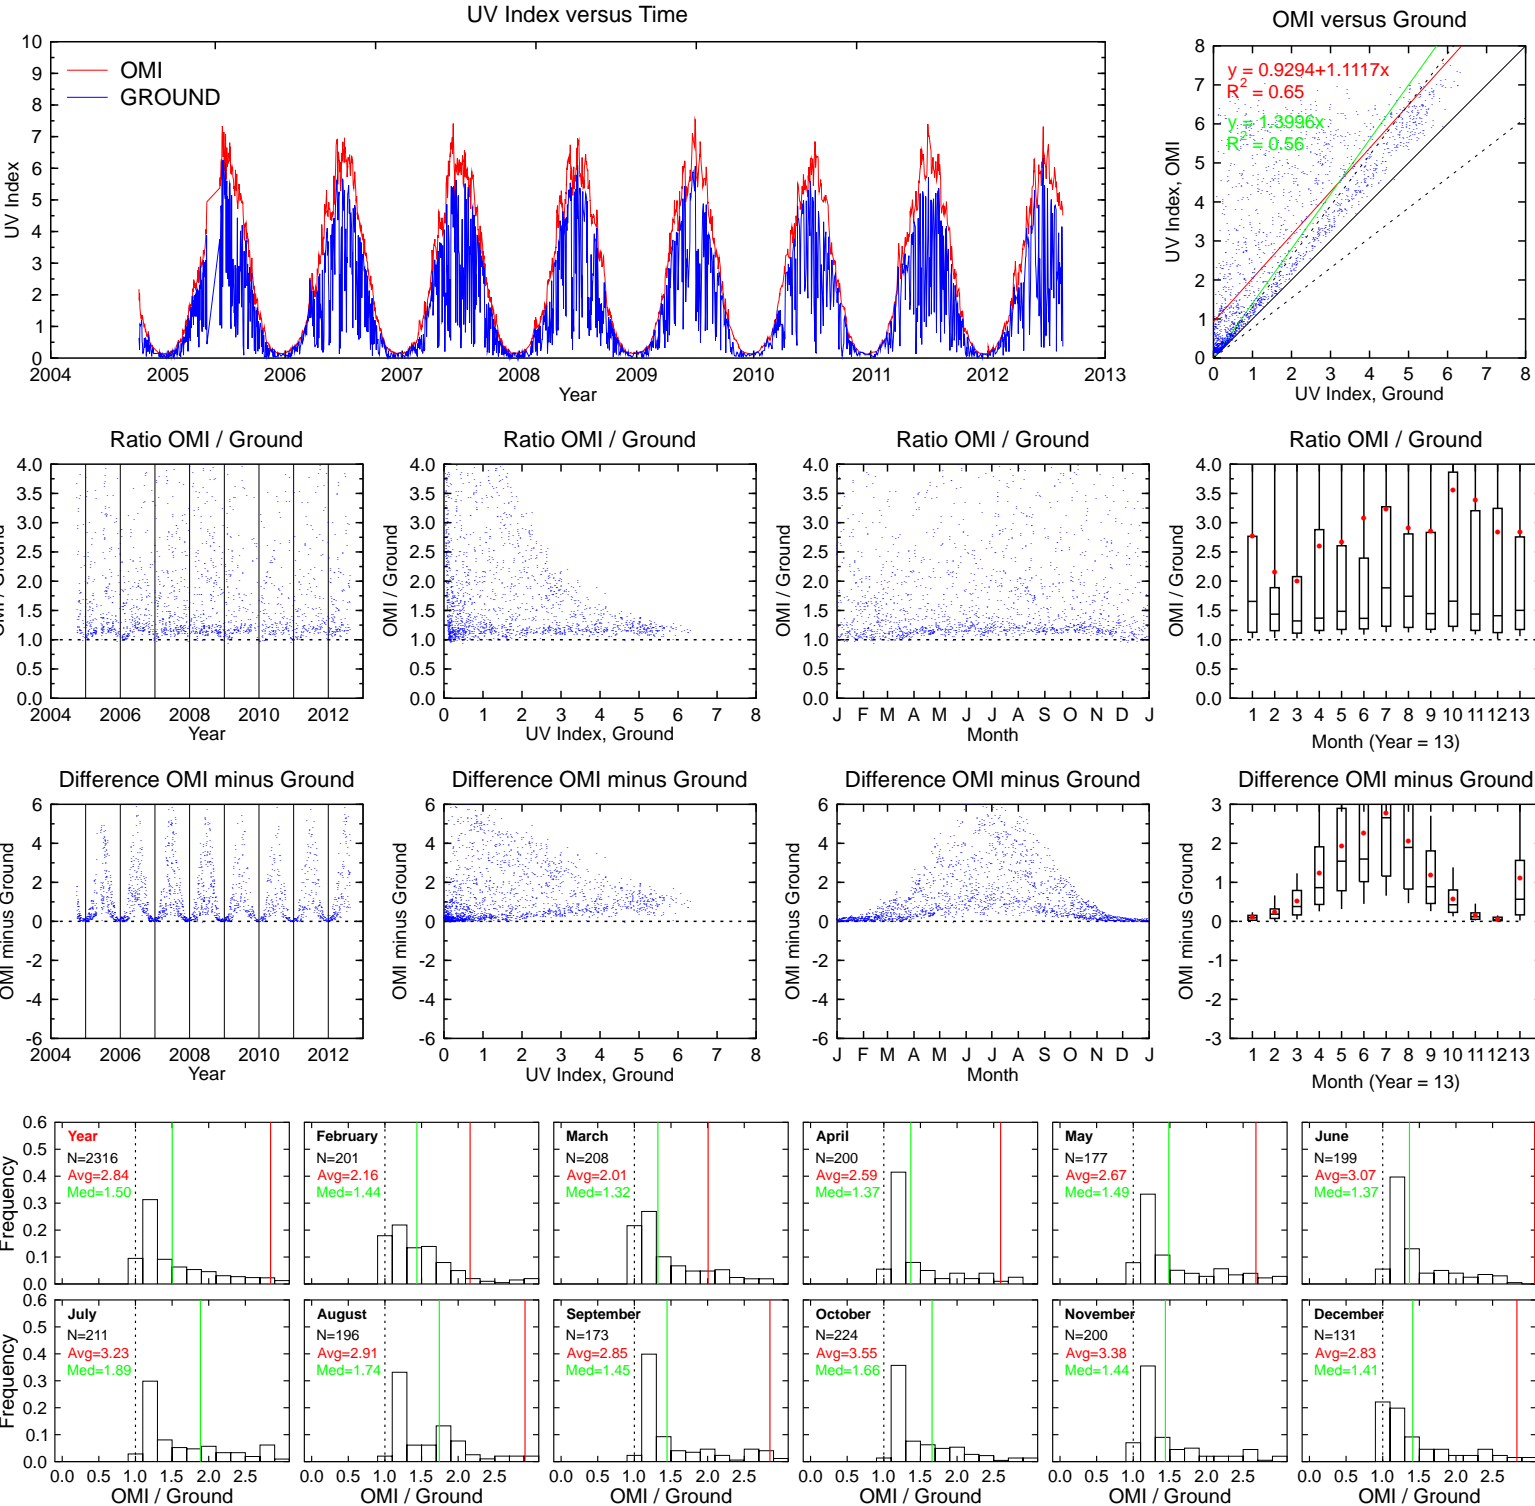

Supplement: Supplementary file 81 [file acp-15-7391-2015-supplement.zip]
