# Supplementary material for: Comparison of OMI UV observations with ground-based measurements at high northern latitudes
Source: Copernicus journal article supplement (doi:10.5194/acp-15-7391-2015), 2015-07-09

Alert, Canada (82.5°N, 62.32°E)  
EDDose, SZA less than 84, Dist less than 12 km

| Month     | N   | Minimum | 5%   | 25%  | Median | Average | 75%  | 95%  | Maximum | W10 | W20 | W30 |
|-----------|-----|---------|------|------|--------|---------|------|------|---------|-----|-----|-----|
| January   | 0   | 0.00    | 0.00 | 0.00 | 0.00   | 0.00    | 0.00 | 0.00 | 0.00    | 0   | 0   | 0   |
| February  | 0   | 0.00    | 0.00 | 0.00 | 0.00   | 0.00    | 0.00 | 0.00 | 0.00    | 0   | 0   | 0   |
| March     | 42  | 0.84    | 0.88 | 0.96 | 0.98   | 1.00    | 1.05 | 1.13 | 1.18    | 83  | 100 | 100 |
| April     | 74  | 0.89    | 0.93 | 0.98 | 1.02   | 1.04    | 1.11 | 1.17 | 1.34    | 73  | 96  | 99  |
| May       | 43  | 0.95    | 0.96 | 0.99 | 1.02   | 1.03    | 1.05 | 1.16 | 1.38    | 93  | 95  | 98  |
| June      | 86  | 0.56    | 0.73 | 1.02 | 1.16   | 1.20    | 1.34 | 1.83 | 2.56    | 26  | 50  | 66  |
| July      | 97  | 0.48    | 0.67 | 0.95 | 1.14   | 1.17    | 1.34 | 1.78 | 3.28    | 31  | 47  | 65  |
| August    | 72  | 0.14    | 0.23 | 0.50 | 1.03   | 0.91    | 1.24 | 1.50 | 1.80    | 24  | 35  | 50  |
| September | 33  | 0.23    | 0.24 | 0.43 | 0.55   | 0.75    | 1.09 | 1.73 | 1.73    | 12  | 24  | 27  |
| October   | 0   | 0.00    | 0.00 | 0.00 | 0.00   | 0.00    | 0.00 | 0.00 | 0.00    | 0   | 0   | 0   |
| November  | 0   | 0.00    | 0.00 | 0.00 | 0.00   | 0.00    | 0.00 | 0.00 | 0.00    | 0   | 0   | 0   |
| December  | 0   | 0.00    | 0.00 | 0.00 | 0.00   | 0.00    | 0.00 | 0.00 | 0.00    | 0   | 0   | 0   |
| Year      | 447 | 0.14    | 0.43 | 0.96 | 1.04   | 1.05    | 1.19 | 1.54 | 3.28    | 45  | 62  | 72  |

Erythral Dose [kJ/m<sup>2</sup>] versus Time

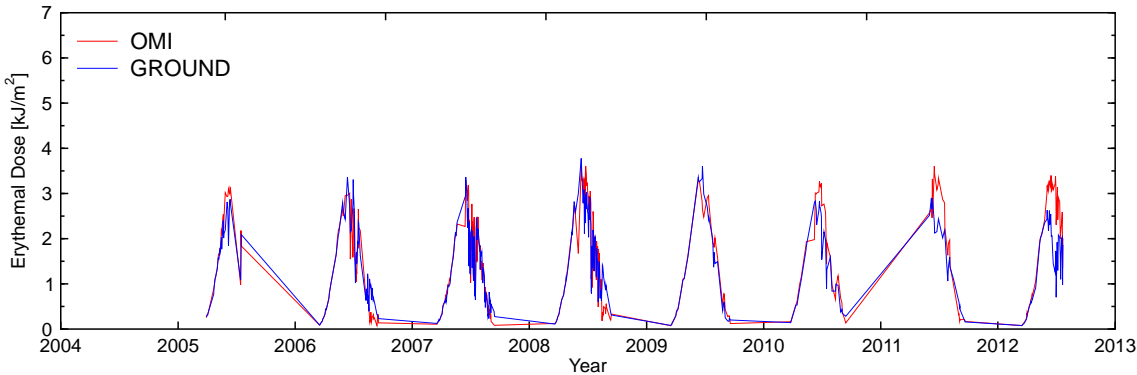

OMI versus Ground

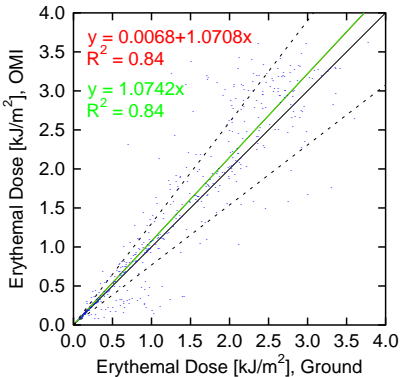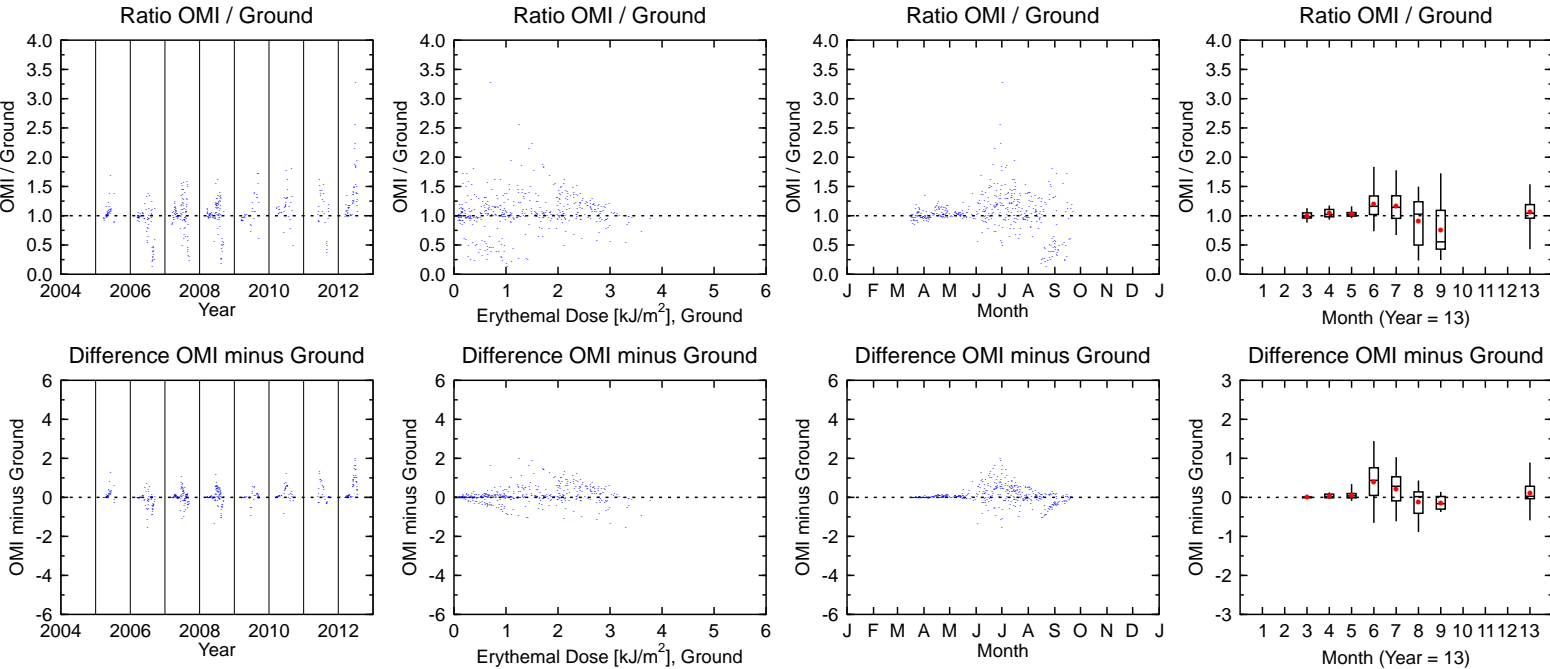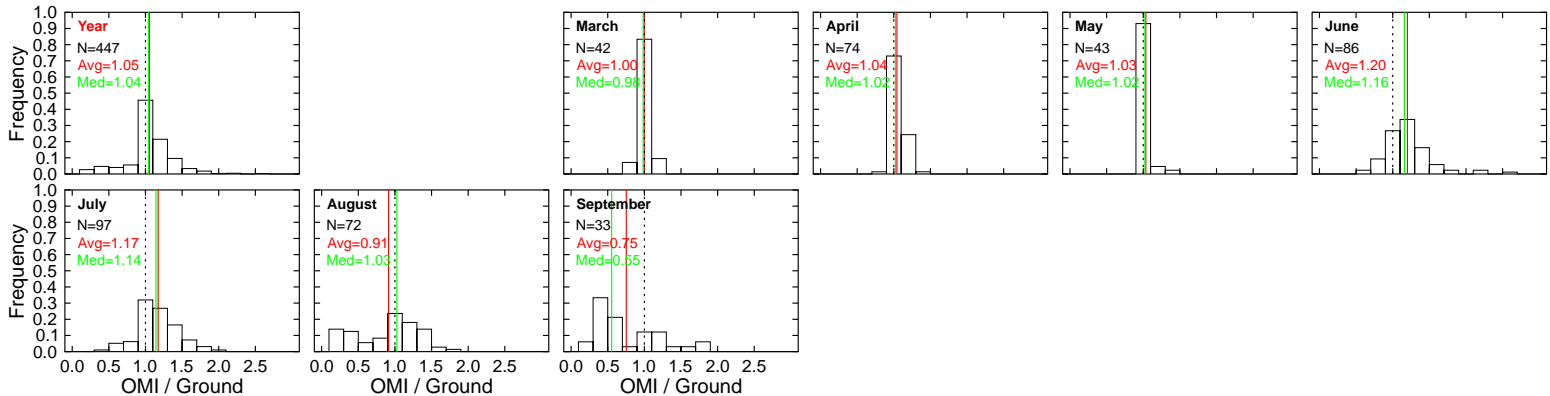

Supplement: Supplementary file 82 [file acp-15-7391-2015-supplement.zip]
