# Supplementary material for: Comparison of OMI UV observations with ground-based measurements at high northern latitudes
Source: Copernicus journal article supplement (doi:10.5194/acp-15-7391-2015), 2015-07-09

Ny-Alesund, Svalbard (78.92°N, 11.92°E)

CSEDRate (Ground at local solar noon), SZA less than 84, Dist less than 12 km

| Month     | N    | Minimum | 5%   | 25%  | Median | Average | 75%  | 95%  | Maximum | W10 | W20 | W30 |
|-----------|------|---------|------|------|--------|---------|------|------|---------|-----|-----|-----|
| January   | 0    | 0.00    | 0.00 | 0.00 | 0.00   | 0.00    | 0.00 | 0.00 | 0.00    | 0   | 0   | 0   |
| February  | 0    | 0.00    | 0.00 | 0.00 | 0.00   | 0.00    | 0.00 | 0.00 | 0.00    | 0   | 0   | 0   |
| March     | 277  | 0.78    | 0.90 | 0.98 | 1.05   | 1.11    | 1.18 | 1.55 | 2.43    | 55  | 77  | 85  |
| April     | 490  | 0.82    | 0.88 | 0.99 | 1.08   | 1.21    | 1.24 | 1.80 | 3.61    | 49  | 68  | 78  |
| May       | 434  | 0.49    | 0.95 | 1.03 | 1.15   | 1.36    | 1.46 | 2.28 | 6.56    | 38  | 55  | 66  |
| June      | 409  | 0.92    | 0.99 | 1.10 | 1.36   | 1.53    | 1.73 | 2.60 | 5.04    | 26  | 38  | 45  |
| July      | 466  | 0.97    | 1.12 | 1.35 | 1.78   | 2.24    | 2.71 | 4.70 | 9.79    | 2   | 18  | 23  |
| August    | 462  | 1.03    | 1.16 | 1.39 | 1.88   | 2.22    | 2.64 | 4.40 | 7.98    | 2   | 13  | 20  |
| September | 405  | 0.94    | 1.06 | 1.16 | 1.44   | 1.72    | 1.97 | 3.36 | 6.43    | 11  | 30  | 38  |
| October   | 26   | 0.97    | 0.99 | 1.03 | 1.10   | 1.49    | 1.66 | 3.21 | 3.26    | 50  | 65  | 65  |
| November  | 0    | 0.00    | 0.00 | 0.00 | 0.00   | 0.00    | 0.00 | 0.00 | 0.00    | 0   | 0   | 0   |
| December  | 0    | 0.00    | 0.00 | 0.00 | 0.00   | 0.00    | 0.00 | 0.00 | 0.00    | 0   | 0   | 0   |
| Year      | 2969 | 0.49    | 0.95 | 1.09 | 1.32   | 1.66    | 1.83 | 3.52 | 9.79    | 25  | 41  | 49  |

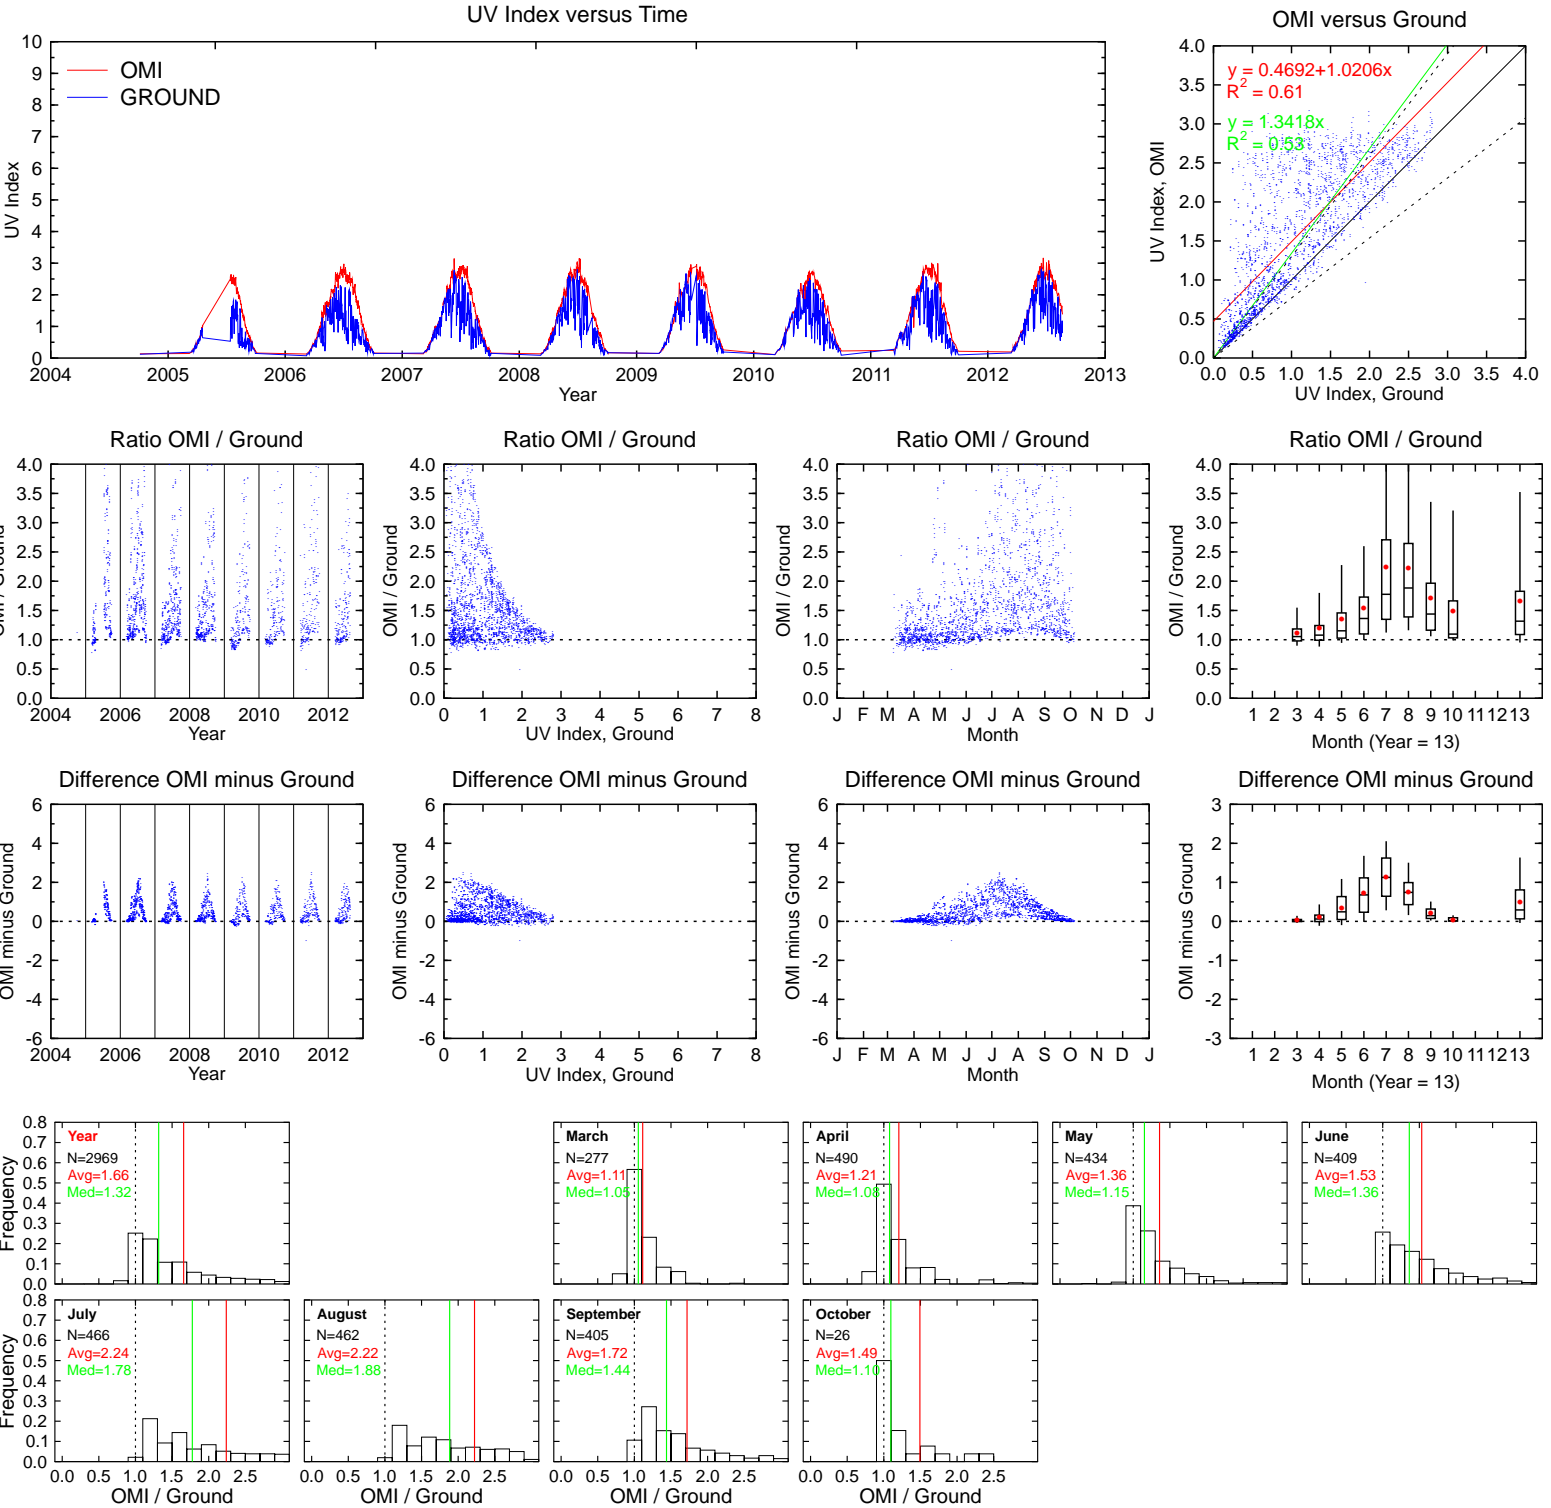

Supplement: Supplementary file 83 [file acp-15-7391-2015-supplement.zip]
