# Supplementary material for: Comparison of OMI UV observations with ground-based measurements at high northern latitudes
Source: Copernicus journal article supplement (doi:10.5194/acp-15-7391-2015), 2015-07-09

Finse, Norway (60.60°N, 7.52°E)

CSEDRate (Ground at local solar noon), SZA less than 84, Dist less than 12 km

| Month     | N    | Minimum | 5%   | 25%  | Median | Average | 75%  | 95%  | Maximum | W10 | W20 | W30 |
|-----------|------|---------|------|------|--------|---------|------|------|---------|-----|-----|-----|
| January   | 25   | 0.71    | 0.78 | 0.86 | 0.92   | 0.94    | 0.99 | 1.16 | 1.17    | 40  | 80  | 96  |
| February  | 73   | 0.68    | 0.80 | 0.87 | 0.91   | 0.95    | 1.00 | 1.27 | 1.35    | 41  | 81  | 96  |
| March     | 115  | 0.67    | 0.78 | 0.86 | 0.95   | 1.00    | 1.05 | 1.53 | 1.98    | 42  | 76  | 88  |
| April     | 160  | 0.70    | 0.79 | 0.86 | 0.93   | 1.03    | 1.11 | 1.52 | 2.58    | 32  | 66  | 83  |
| May       | 179  | 0.73    | 0.79 | 0.90 | 0.98   | 1.12    | 1.23 | 2.09 | 2.75    | 42  | 63  | 77  |
| June      | 187  | 0.78    | 0.89 | 1.00 | 1.31   | 2.01    | 1.95 | 4.87 | 34.55   | 32  | 44  | 49  |
| July      | 216  | 0.84    | 0.96 | 1.10 | 1.44   | 2.37    | 2.65 | 6.26 | 18.19   | 22  | 38  | 43  |
| August    | 204  | 0.92    | 1.02 | 1.19 | 1.84   | 2.51    | 2.78 | 6.13 | 17.74   | 22  | 26  | 29  |
| September | 160  | 0.74    | 1.01 | 1.13 | 1.63   | 2.60    | 2.93 | 8.13 | 16.64   | 21  | 32  | 36  |
| October   | 204  | 0.76    | 0.85 | 1.05 | 1.26   | 2.09    | 1.88 | 6.75 | 19.29   | 22  | 39  | 51  |
| November  | 109  | 0.76    | 0.82 | 0.92 | 1.05   | 1.23    | 1.22 | 1.93 | 7.87    | 35  | 64  | 77  |
| December  | 13   | 0.74    | 0.74 | 0.82 | 0.86   | 0.90    | 0.94 | 1.18 | 1.18    | 31  | 62  | 92  |
| Year      | 1645 | 0.67    | 0.83 | 0.96 | 1.13   | 1.80    | 1.74 | 4.92 | 34.55   | 29  | 49  | 59  |

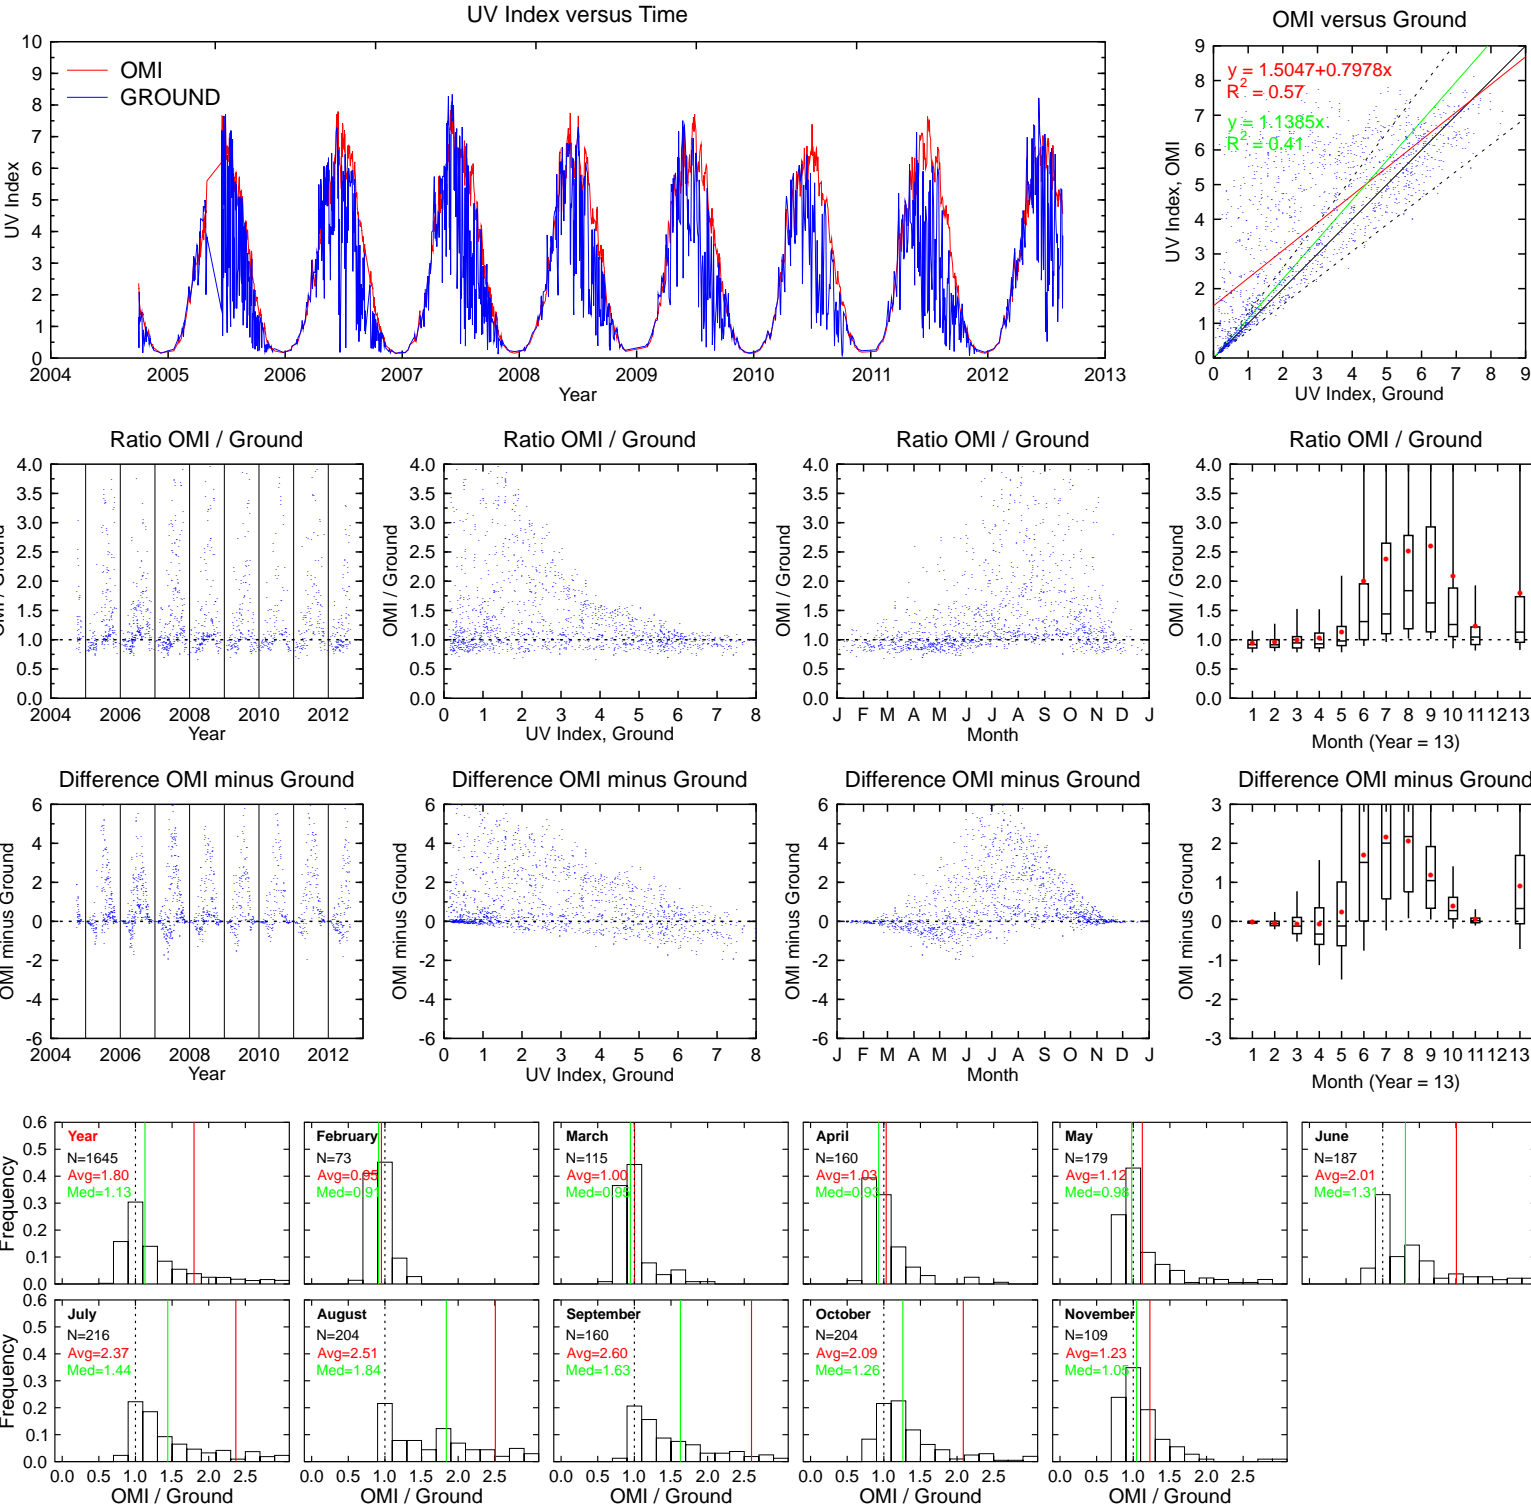

Supplement: Supplementary file 85 [file acp-15-7391-2015-supplement.zip]
