# Supplementary material for: Comparison of OMI UV observations with ground-based measurements at high northern latitudes
Source: Copernicus journal article supplement (doi:10.5194/acp-15-7391-2015), 2015-07-09

Barrow, Alaska (71.32°N, 156.68°E)

CSEDRate (Ground at local solar noon), SZA less than 84, Dist less than 12 km

| Month     | N    | Minimum | 5%   | 25%  | Median | Average | 75%  | 95%  | Maximum | W10 | W20 | W30 |
|-----------|------|---------|------|------|--------|---------|------|------|---------|-----|-----|-----|
| January   | 0    | 0.00    | 0.00 | 0.00 | 0.00   | 0.00    | 0.00 | 0.00 | 0.00    | 0   | 0   | 0   |
| February  | 54   | 0.91    | 0.92 | 0.99 | 1.02   | 1.05    | 1.09 | 1.31 | 1.61    | 85  | 93  | 94  |
| March     | 171  | 0.71    | 0.96 | 1.00 | 1.04   | 1.06    | 1.09 | 1.21 | 1.63    | 77  | 92  | 96  |
| April     | 169  | 0.90    | 1.03 | 1.08 | 1.13   | 1.18    | 1.23 | 1.52 | 2.11    | 31  | 72  | 82  |
| May       | 188  | 1.01    | 1.09 | 1.16 | 1.25   | 1.32    | 1.40 | 1.70 | 3.27    | 7   | 39  | 57  |
| June      | 317  | 0.91    | 1.07 | 1.16 | 1.35   | 1.50    | 1.66 | 2.38 | 4.54    | 11  | 33  | 43  |
| July      | 274  | 1.04    | 1.09 | 1.18 | 1.38   | 1.66    | 1.84 | 3.04 | 5.51    | 5   | 29  | 45  |
| August    | 279  | 1.02    | 1.15 | 1.32 | 1.70   | 1.99    | 2.18 | 3.77 | 13.58   | 1   | 14  | 24  |
| September | 285  | 1.15    | 1.21 | 1.59 | 1.93   | 2.14    | 2.44 | 3.81 | 6.31    | 0   | 4   | 9   |
| October   | 206  | 1.12    | 1.23 | 1.38 | 1.69   | 1.83    | 2.15 | 2.84 | 4.25    | 0   | 2   | 14  |
| November  | 0    | 0.00    | 0.00 | 0.00 | 0.00   | 0.00    | 0.00 | 0.00 | 0.00    | 0   | 0   | 0   |
| December  | 0    | 0.00    | 0.00 | 0.00 | 0.00   | 0.00    | 0.00 | 0.00 | 0.00    | 0   | 0   | 0   |
| Year      | 1943 | 0.71    | 1.02 | 1.15 | 1.38   | 1.62    | 1.84 | 2.95 | 13.58   | 15  | 33  | 43  |

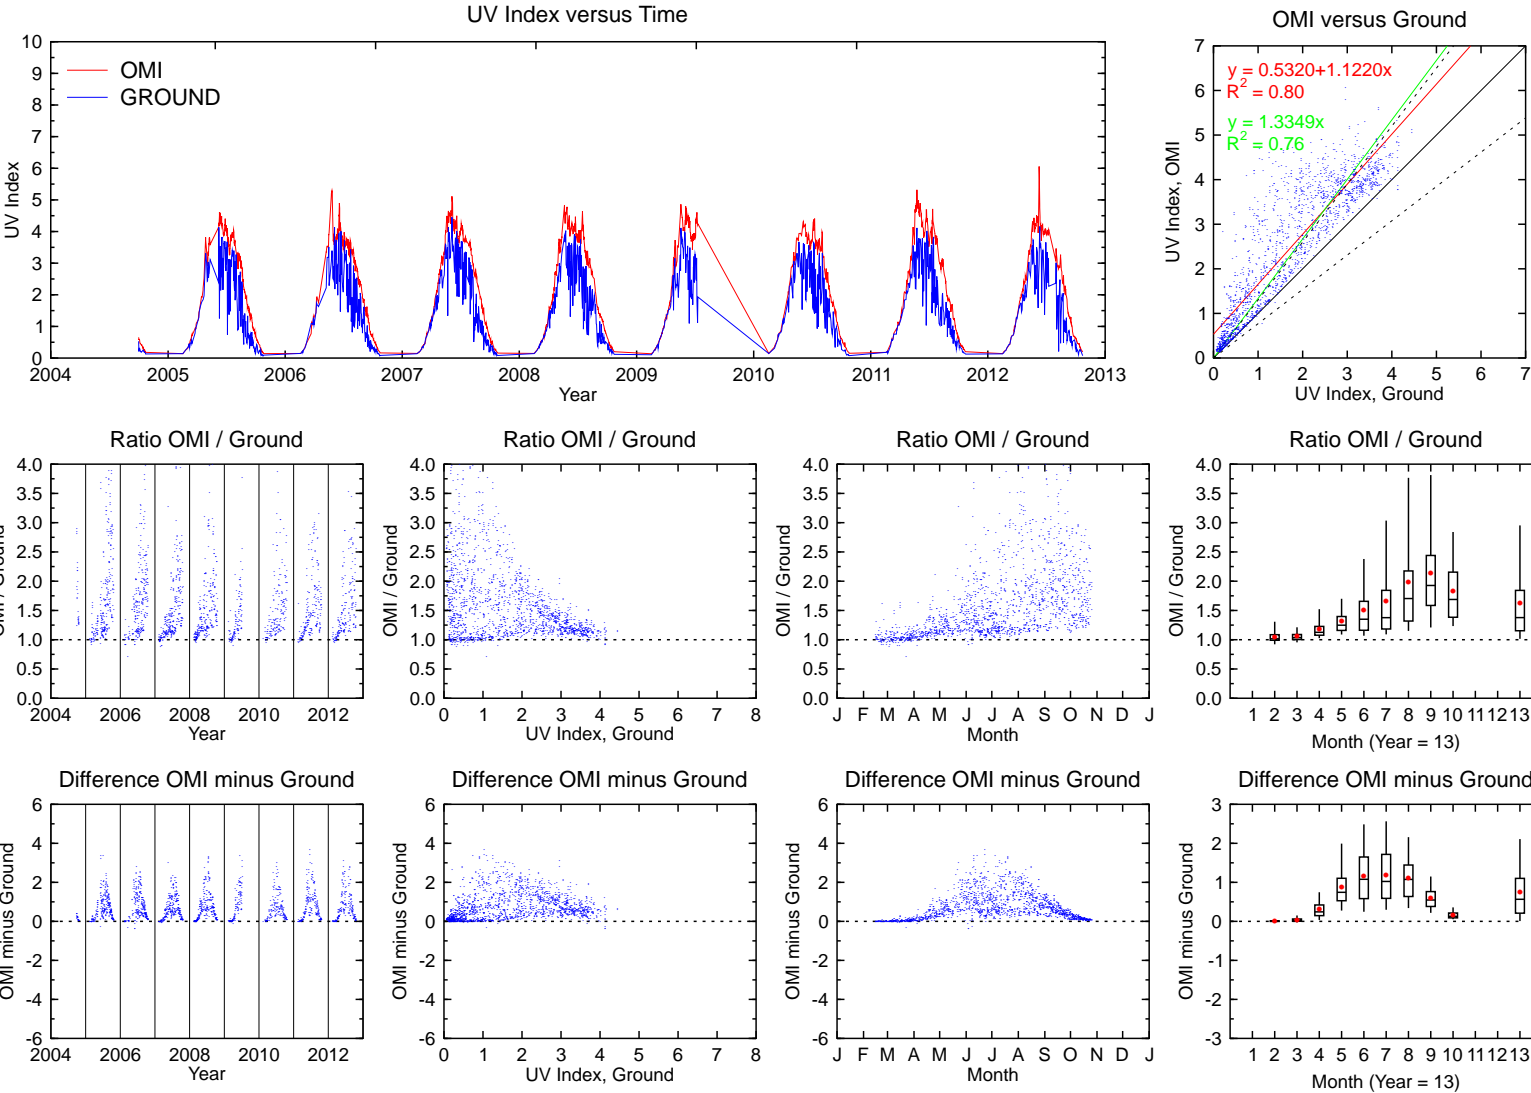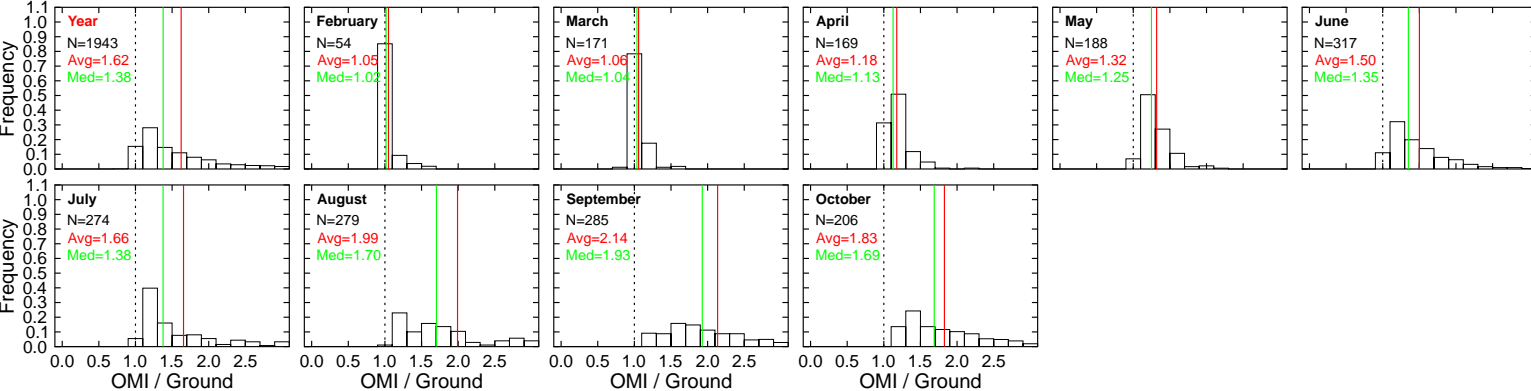

Supplement: Supplementary file 86 [file acp-15-7391-2015-supplement.zip]
