# Supplementary material for: Comparison of OMI UV observations with ground-based measurements at high northern latitudes
Source: Copernicus journal article supplement (doi:10.5194/acp-15-7391-2015), 2015-07-09

Eureka, Canada (79.99°N, 85.93°E)

EDDose, all data

| Month     | N    | Minimum | 5%   | 25%  | Median | Average | 75%  | 95%  | Maximum | W10 | W20 | W30 |
|-----------|------|---------|------|------|--------|---------|------|------|---------|-----|-----|-----|
| January   | 0    | 0.00    | 0.00 | 0.00 | 0.00   | 0.00    | 0.00 | 0.00 | 0.00    | 0   | 0   | 0   |
| February  | 10   | 0.35    | 0.35 | 0.40 | 0.67   | 0.65    | 0.79 | 0.95 | 0.95    | 20  | 20  | 30  |
| March     | 184  | 0.26    | 0.79 | 1.00 | 1.07   | 1.07    | 1.14 | 1.30 | 2.29    | 51  | 81  | 91  |
| April     | 124  | 0.50    | 1.01 | 1.08 | 1.12   | 1.14    | 1.17 | 1.39 | 3.08    | 35  | 85  | 92  |
| May       | 150  | 0.47    | 0.75 | 1.07 | 1.13   | 1.14    | 1.20 | 1.46 | 2.40    | 31  | 69  | 81  |
| June      | 176  | 0.60    | 0.86 | 1.14 | 1.25   | 1.26    | 1.36 | 1.63 | 2.09    | 14  | 34  | 59  |
| July      | 198  | 0.83    | 0.94 | 1.09 | 1.16   | 1.16    | 1.21 | 1.40 | 2.17    | 24  | 72  | 88  |
| August    | 189  | 0.64    | 0.89 | 1.13 | 1.22   | 1.23    | 1.28 | 1.61 | 2.93    | 13  | 41  | 77  |
| September | 167  | 0.42    | 0.63 | 1.08 | 1.29   | 1.27    | 1.48 | 1.87 | 2.81    | 12  | 27  | 43  |
| October   | 83   | 0.15    | 0.35 | 0.83 | 1.08   | 1.07    | 1.30 | 1.71 | 2.33    | 18  | 35  | 54  |
| November  | 0    | 0.00    | 0.00 | 0.00 | 0.00   | 0.00    | 0.00 | 0.00 | 0.00    | 0   | 0   | 0   |
| December  | 0    | 0.00    | 0.00 | 0.00 | 0.00   | 0.00    | 0.00 | 0.00 | 0.00    | 0   | 0   | 0   |
| Year      | 1281 | 0.15    | 0.76 | 1.06 | 1.16   | 1.17    | 1.27 | 1.58 | 3.08    | 25  | 56  | 74  |

Erythral Dose [kJ/m<sup>2</sup>] versus Time

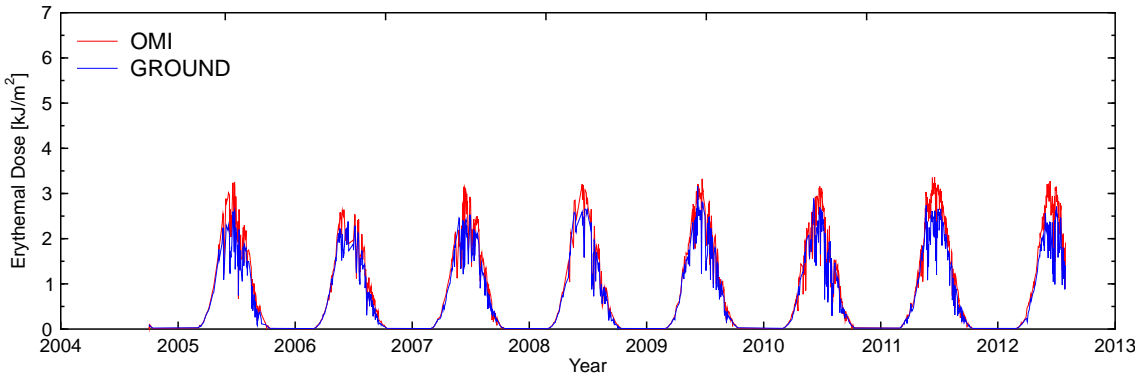

OMI versus Ground

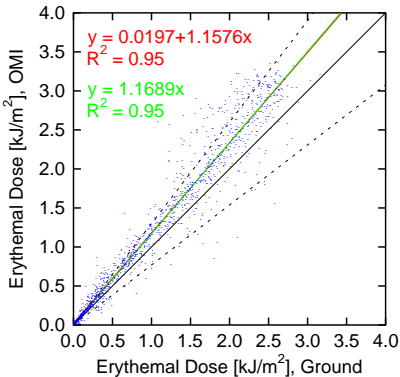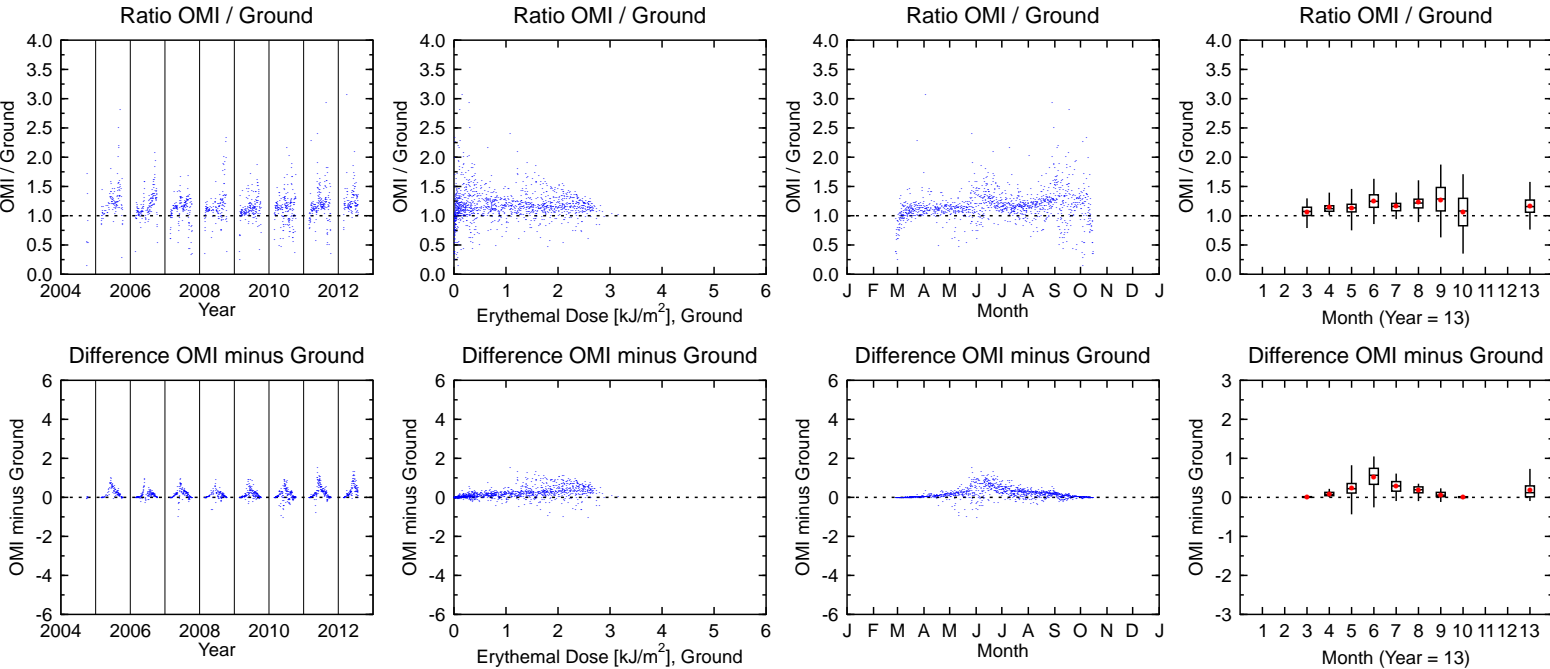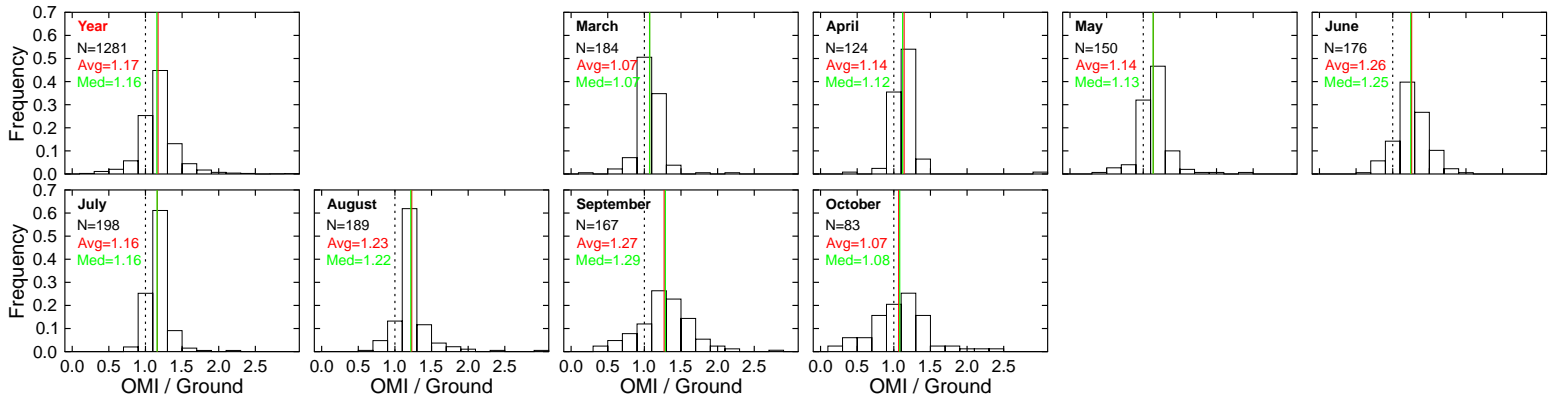

Supplement: Supplementary file 88 [file acp-15-7391-2015-supplement.zip]
