# Supplementary material for: Comparison of OMI UV observations with ground-based measurements at high northern latitudes
Source: Copernicus journal article supplement (doi:10.5194/acp-15-7391-2015), 2015-07-09

Sodankyla, Finland (67.37°N, 26.63°E)  
EDRate (Ground at local solar noon), SZA less than 84, Dist less than 12 km

| Month     | N    | Minimum | 5%   | 25%  | Median | Average | 75%  | 95%  | Maximum | W10 | W20 | W30 |
|-----------|------|---------|------|------|--------|---------|------|------|---------|-----|-----|-----|
| January   | 0    | 0.00    | 0.00 | 0.00 | 0.00   | 0.00    | 0.00 | 0.00 | 0.00    | 0   | 0   | 0   |
| February  | 64   | 0.82    | 0.95 | 1.02 | 1.10   | 1.10    | 1.18 | 1.27 | 1.34    | 48  | 80  | 97  |
| March     | 191  | 0.48    | 0.88 | 1.03 | 1.09   | 1.12    | 1.14 | 1.44 | 3.26    | 49  | 83  | 91  |
| April     | 243  | 0.64    | 0.83 | 0.98 | 1.06   | 1.12    | 1.16 | 1.65 | 3.36    | 49  | 75  | 84  |
| May       | 207  | 0.44    | 0.66 | 0.91 | 1.08   | 1.19    | 1.33 | 2.08 | 5.00    | 29  | 50  | 62  |
| June      | 190  | 0.62    | 0.70 | 0.95 | 1.07   | 1.30    | 1.33 | 2.30 | 11.51   | 32  | 51  | 65  |
| July      | 224  | 0.60    | 0.78 | 0.94 | 1.07   | 1.30    | 1.39 | 2.66 | 5.60    | 32  | 52  | 67  |
| August    | 201  | 0.56    | 0.79 | 0.96 | 1.04   | 1.20    | 1.28 | 2.01 | 4.57    | 43  | 61  | 73  |
| September | 185  | 0.43    | 0.66 | 0.97 | 1.08   | 1.13    | 1.25 | 1.76 | 3.07    | 39  | 60  | 73  |
| October   | 186  | 0.37    | 0.68 | 0.86 | 1.04   | 1.07    | 1.21 | 1.60 | 2.31    | 28  | 54  | 66  |
| November  | 9    | 0.79    | 0.79 | 0.88 | 1.21   | 1.25    | 1.29 | 2.42 | 2.42    | 11  | 22  | 78  |
| December  | 0    | 0.00    | 0.00 | 0.00 | 0.00   | 0.00    | 0.00 | 0.00 | 0.00    | 0   | 0   | 0   |
| Year      | 1700 | 0.37    | 0.74 | 0.96 | 1.07   | 1.18    | 1.24 | 1.97 | 11.51   | 38  | 61  | 74  |

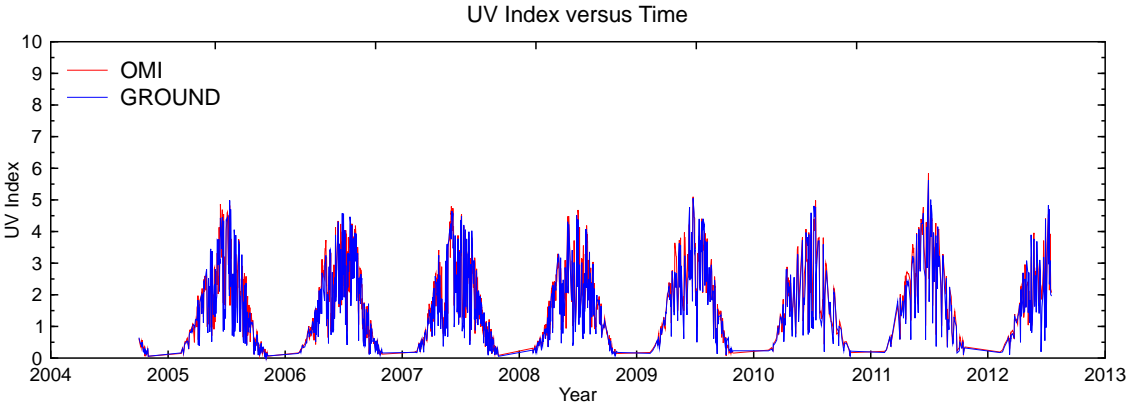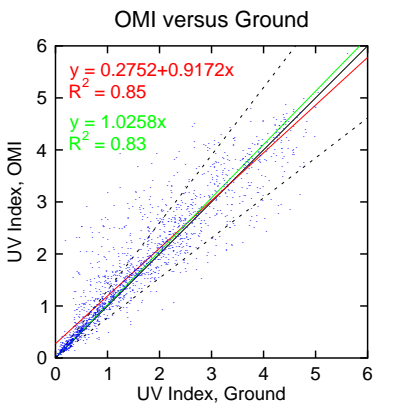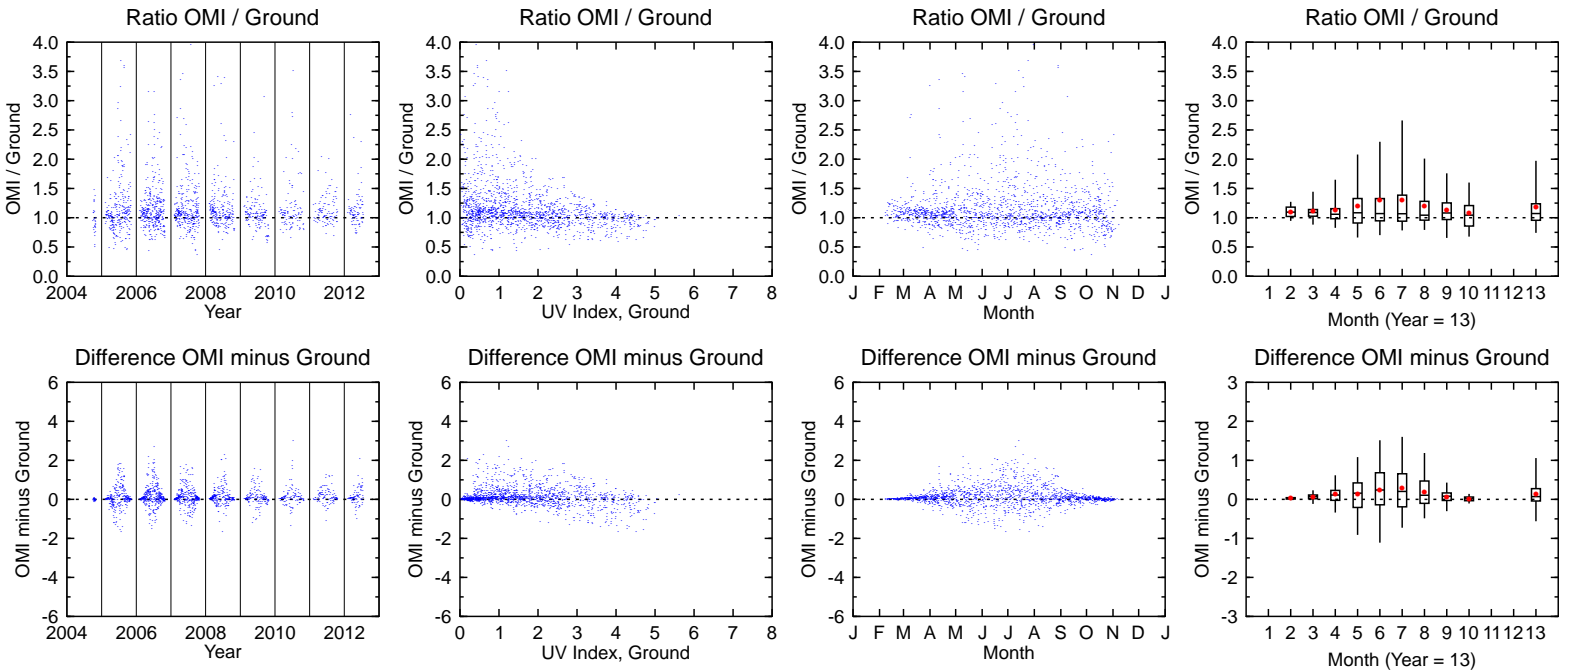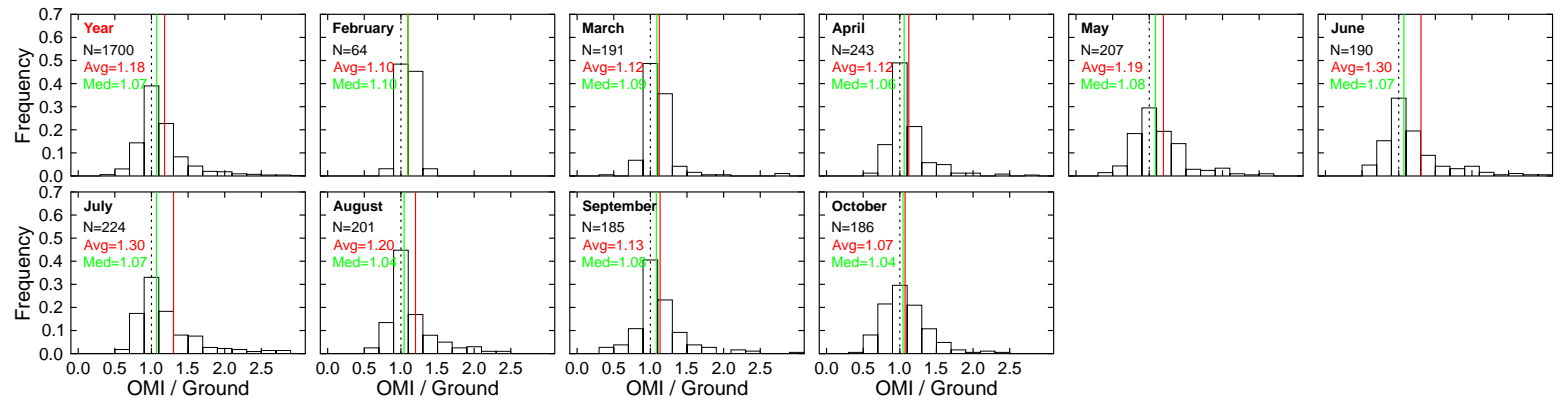

Supplement: Supplementary file 92 [file acp-15-7391-2015-supplement.zip]
