# Supplementary material for: Comparison of OMI UV observations with ground-based measurements at high northern latitudes
Source: Copernicus journal article supplement (doi:10.5194/acp-15-7391-2015), 2015-07-09
Supplement: Supplementary file 93 [file acp-15-7391-2015-supplement.zip]

Sodankyla, Finland (67.37°N, 26.63°E)

CSEDRate (Ground at local solar noon), SZA less than 84, Dist less than 12 km

| Month     | N    | Minimum | 5%   | 25%  | Median | Average | 75%  | 95%   | Maximum | W10 | W20 | W30 |
|-----------|------|---------|------|------|--------|---------|------|-------|---------|-----|-----|-----|
| January   | 0    | 0.00    | 0.00 | 0.00 | 0.00   | 0.00    | 0.00 | 0.00  | 0.00    | 0   | 0   | 0   |
| February  | 64   | 0.97    | 1.04 | 1.08 | 1.15   | 1.26    | 1.24 | 1.75  | 2.85    | 28  | 62  | 84  |
| March     | 191  | 1.00    | 1.07 | 1.11 | 1.20   | 1.45    | 1.47 | 2.73  | 7.04    | 16  | 51  | 62  |
| April     | 243  | 1.01    | 1.06 | 1.10 | 1.19   | 1.55    | 1.70 | 3.51  | 4.93    | 27  | 51  | 59  |
| May       | 207  | 0.96    | 1.04 | 1.17 | 1.76   | 2.30    | 2.97 | 5.10  | 8.93    | 14  | 28  | 31  |
| June      | 190  | 1.01    | 1.05 | 1.18 | 1.65   | 2.36    | 2.49 | 5.95  | 22.24   | 16  | 26  | 29  |
| July      | 224  | 0.99    | 1.05 | 1.18 | 1.60   | 2.46    | 2.72 | 6.40  | 13.52   | 17  | 26  | 34  |
| August    | 201  | 1.03    | 1.07 | 1.19 | 1.52   | 2.06    | 2.26 | 5.23  | 19.54   | 12  | 26  | 34  |
| September | 185  | 1.03    | 1.09 | 1.20 | 1.63   | 2.37    | 2.47 | 6.11  | 16.33   | 7   | 24  | 34  |
| October   | 186  | 1.00    | 1.08 | 1.18 | 1.63   | 2.13    | 2.48 | 5.08  | 7.41    | 8   | 26  | 33  |
| November  | 9    | 1.02    | 1.02 | 1.24 | 2.33   | 3.16    | 2.65 | 11.05 | 11.05   | 22  | 22  | 33  |
| December  | 0    | 0.00    | 0.00 | 0.00 | 0.00   | 0.00    | 0.00 | 0.00  | 0.00    | 0   | 0   | 0   |
| Year      | 1700 | 0.96    | 1.05 | 1.14 | 1.46   | 2.05    | 2.21 | 5.04  | 22.24   | 16  | 34  | 42  |

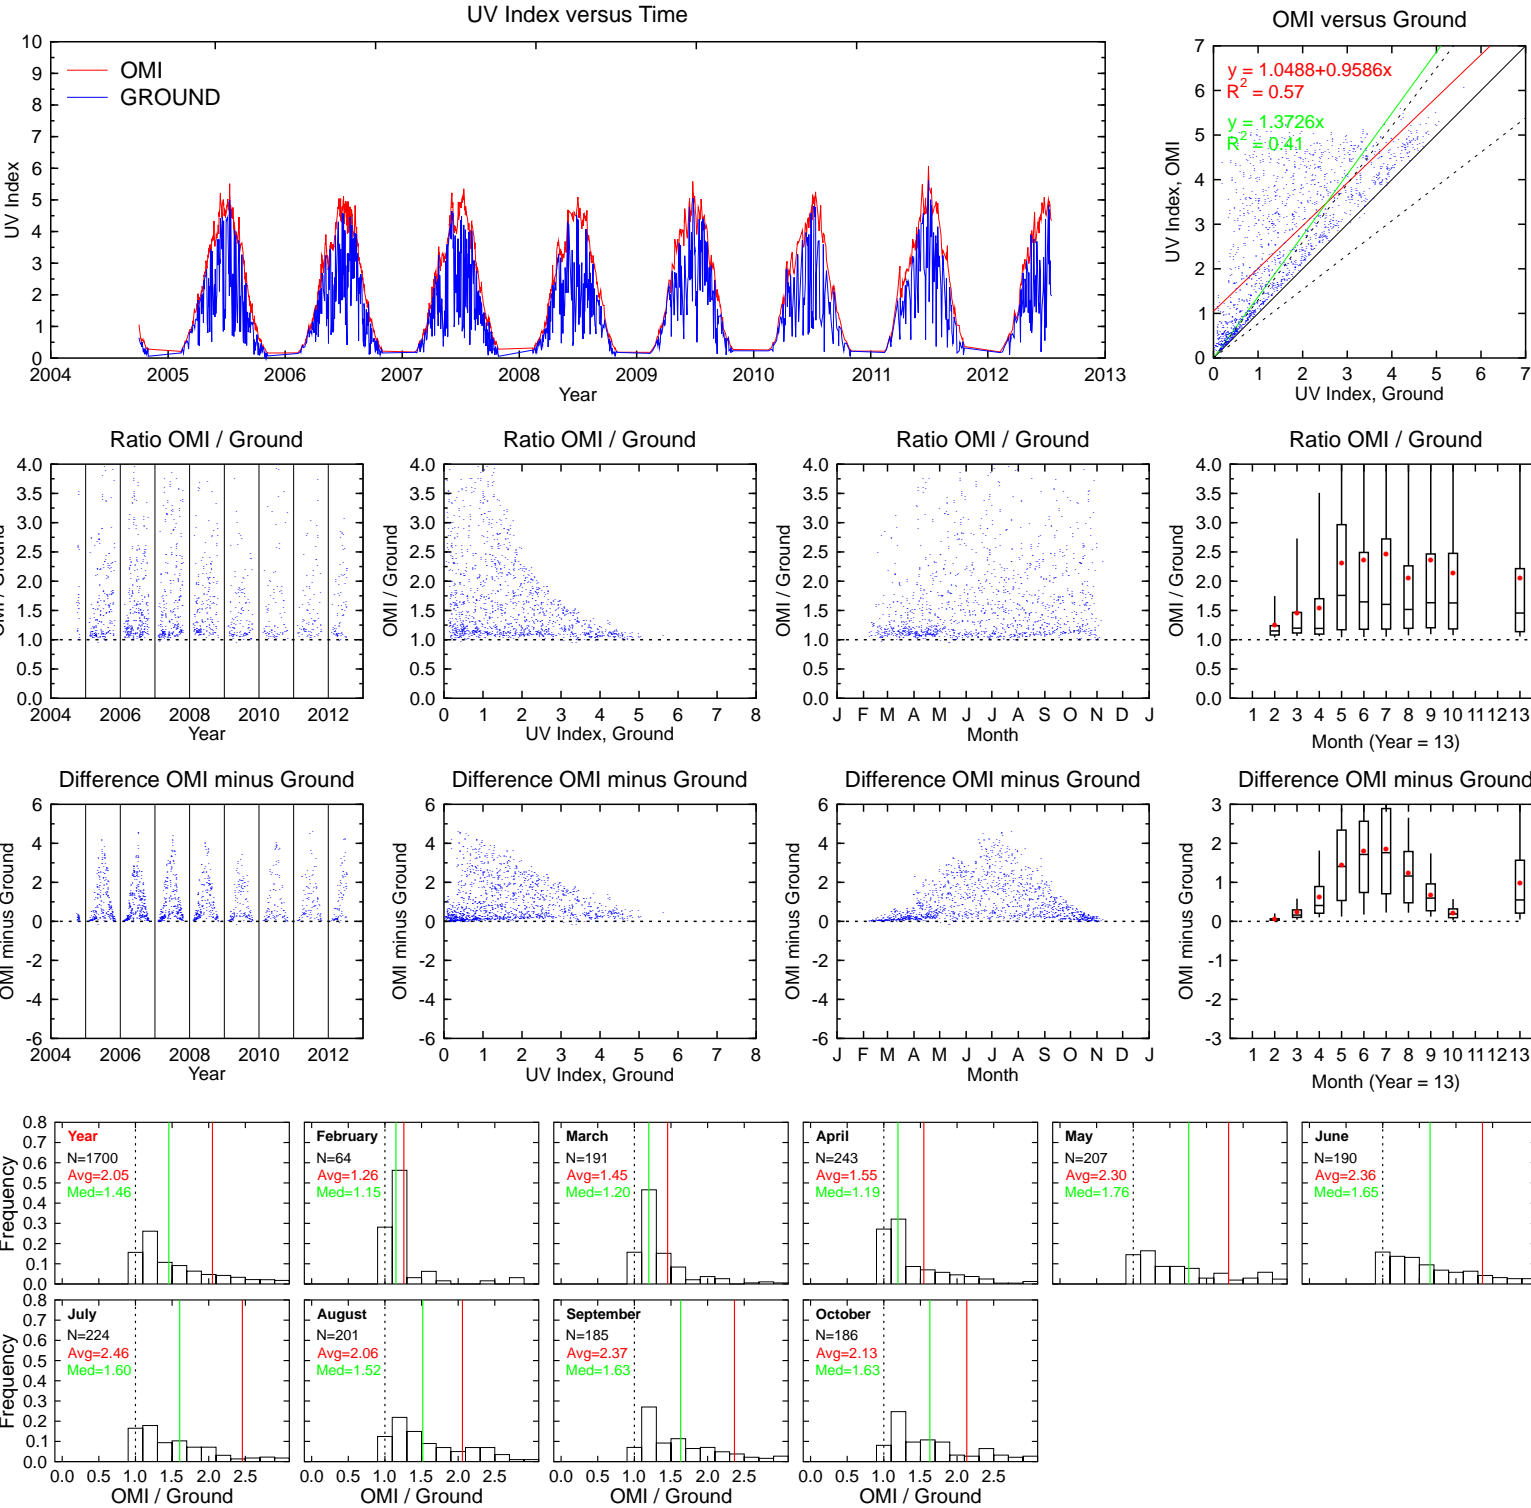

Ratio OMI / Ground

Ratio OMI / Ground

Ratio OMI / Ground

Difference OMI minus Ground

Difference OMI minus Ground

Difference OMI minus Ground

Year

February

March

April

May

June

July

August

September

October
