# Supplementary material for: Comparison of OMI UV observations with ground-based measurements at high northern latitudes
Source: Copernicus journal article supplement (doi:10.5194/acp-15-7391-2015), 2015-07-09

Resolute, Canada (74.72°N, 94.98°E)  
EDDose, all data

| Month     | N   | Minimum | 5%   | 25%  | Median | Average | 75%  | 95%  | Maximum | W10 | W20 | W30 |
|-----------|-----|---------|------|------|--------|---------|------|------|---------|-----|-----|-----|
| January   | 0   | 0.00    | 0.00 | 0.00 | 0.00   | 0.00    | 0.00 | 0.00 | 0.00    | 0   | 0   | 0   |
| February  | 68  | 0.31    | 0.53 | 0.76 | 0.94   | 0.94    | 1.05 | 1.29 | 1.87    | 41  | 59  | 68  |
| March     | 124 | 0.83    | 1.01 | 1.05 | 1.09   | 1.10    | 1.14 | 1.22 | 1.42    | 53  | 94  | 99  |
| April     | 121 | 0.82    | 0.94 | 1.03 | 1.08   | 1.07    | 1.11 | 1.19 | 1.48    | 59  | 95  | 98  |
| May       | 102 | 0.78    | 0.86 | 1.02 | 1.12   | 1.13    | 1.21 | 1.44 | 1.96    | 32  | 70  | 87  |
| June      | 79  | 0.89    | 1.06 | 1.32 | 1.47   | 1.59    | 1.71 | 2.43 | 4.68    | 6   | 13  | 23  |
| July      | 68  | 1.14    | 1.18 | 1.23 | 1.29   | 1.33    | 1.37 | 1.63 | 2.37    | 0   | 13  | 54  |
| August    | 108 | 0.63    | 0.89 | 1.17 | 1.23   | 1.27    | 1.35 | 1.74 | 2.13    | 7   | 27  | 62  |
| September | 109 | 0.56    | 0.68 | 0.95 | 1.20   | 1.18    | 1.38 | 1.70 | 2.13    | 17  | 32  | 50  |
| October   | 81  | 0.51    | 0.77 | 0.95 | 1.15   | 1.17    | 1.34 | 1.70 | 2.72    | 21  | 47  | 67  |
| November  | 0   | 0.00    | 0.00 | 0.00 | 0.00   | 0.00    | 0.00 | 0.00 | 0.00    | 0   | 0   | 0   |
| December  | 0   | 0.00    | 0.00 | 0.00 | 0.00   | 0.00    | 0.00 | 0.00 | 0.00    | 0   | 0   | 0   |
| Year      | 860 | 0.31    | 0.78 | 1.04 | 1.14   | 1.19    | 1.30 | 1.68 | 4.68    | 29  | 54  | 71  |

Erythemal Dose [kJ/m<sup>2</sup>] versus Time

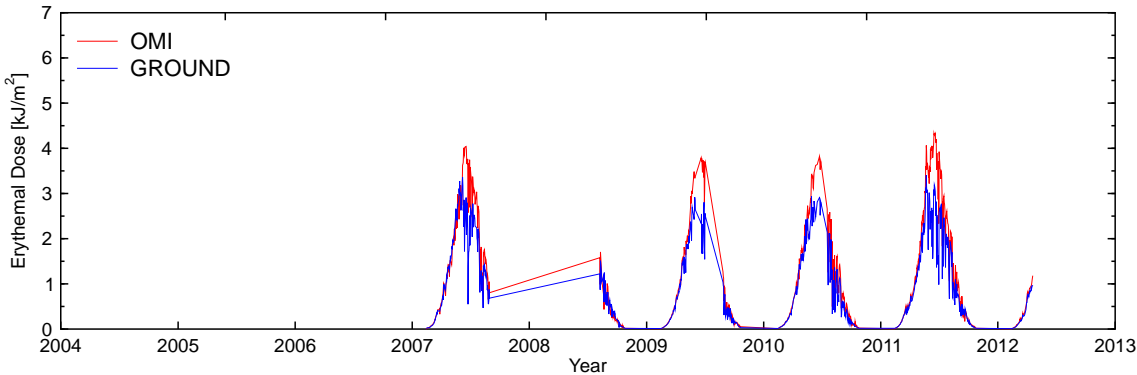

OMI versus Ground

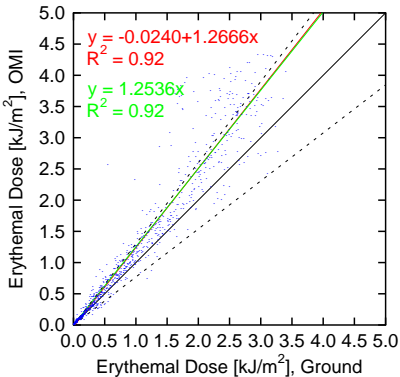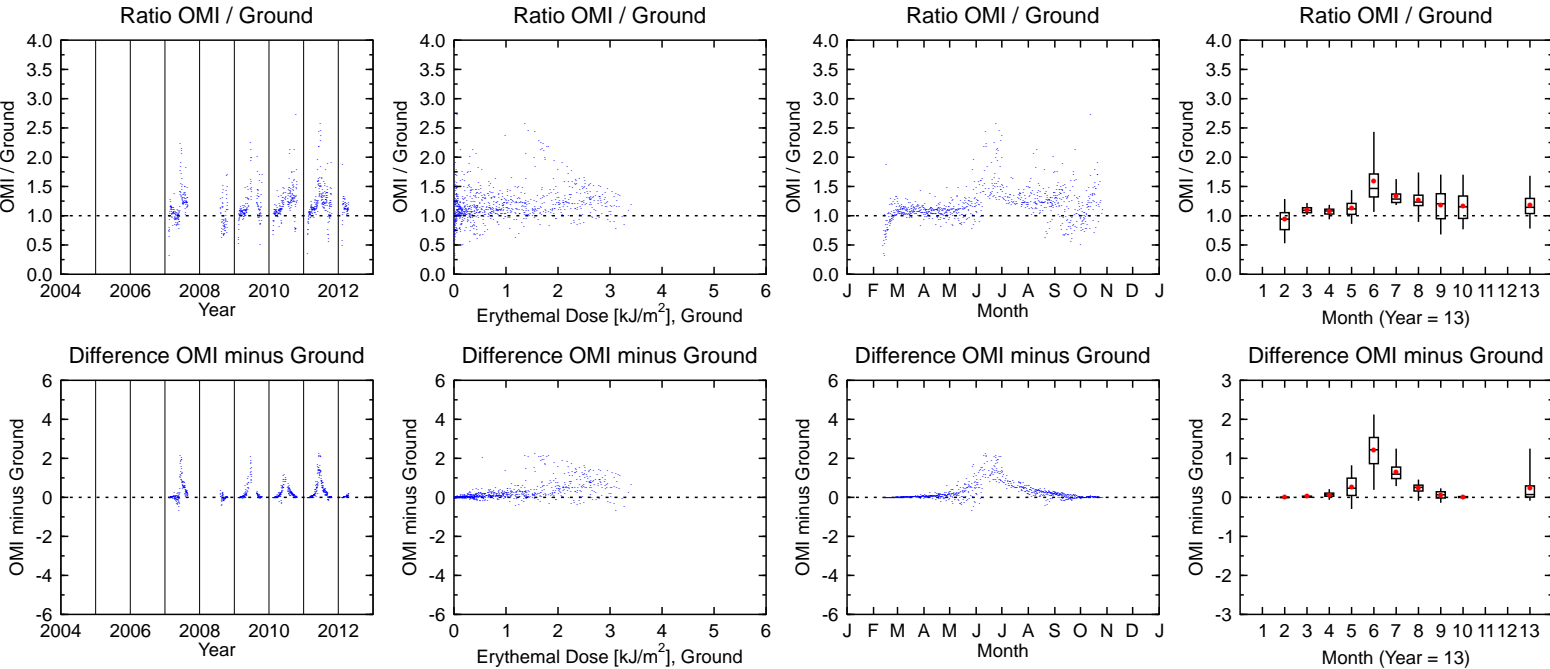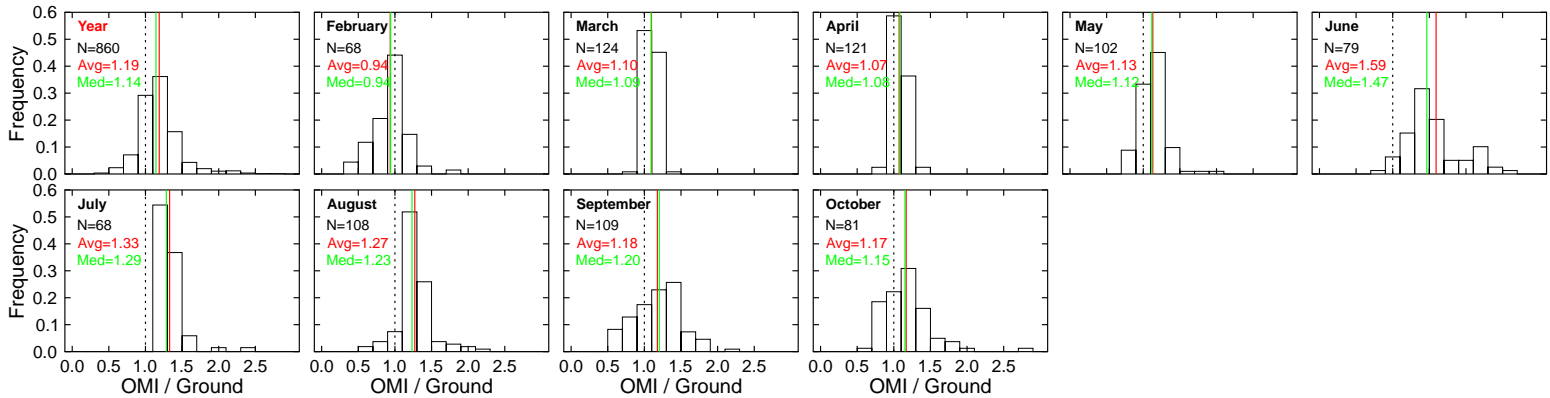

Supplement: Supplementary file 94 [file acp-15-7391-2015-supplement.zip]
