# Supplementary figures and images for: Comparison of OMI UV observations with ground-based measurements at high northern latitudes
Source: Copernicus journal article supplement (doi:10.5194/acp-15-7391-2015), 2015-07-09

CSEDRate (Ground at local solar noon); SZA less than 84; Dist less than 12 km

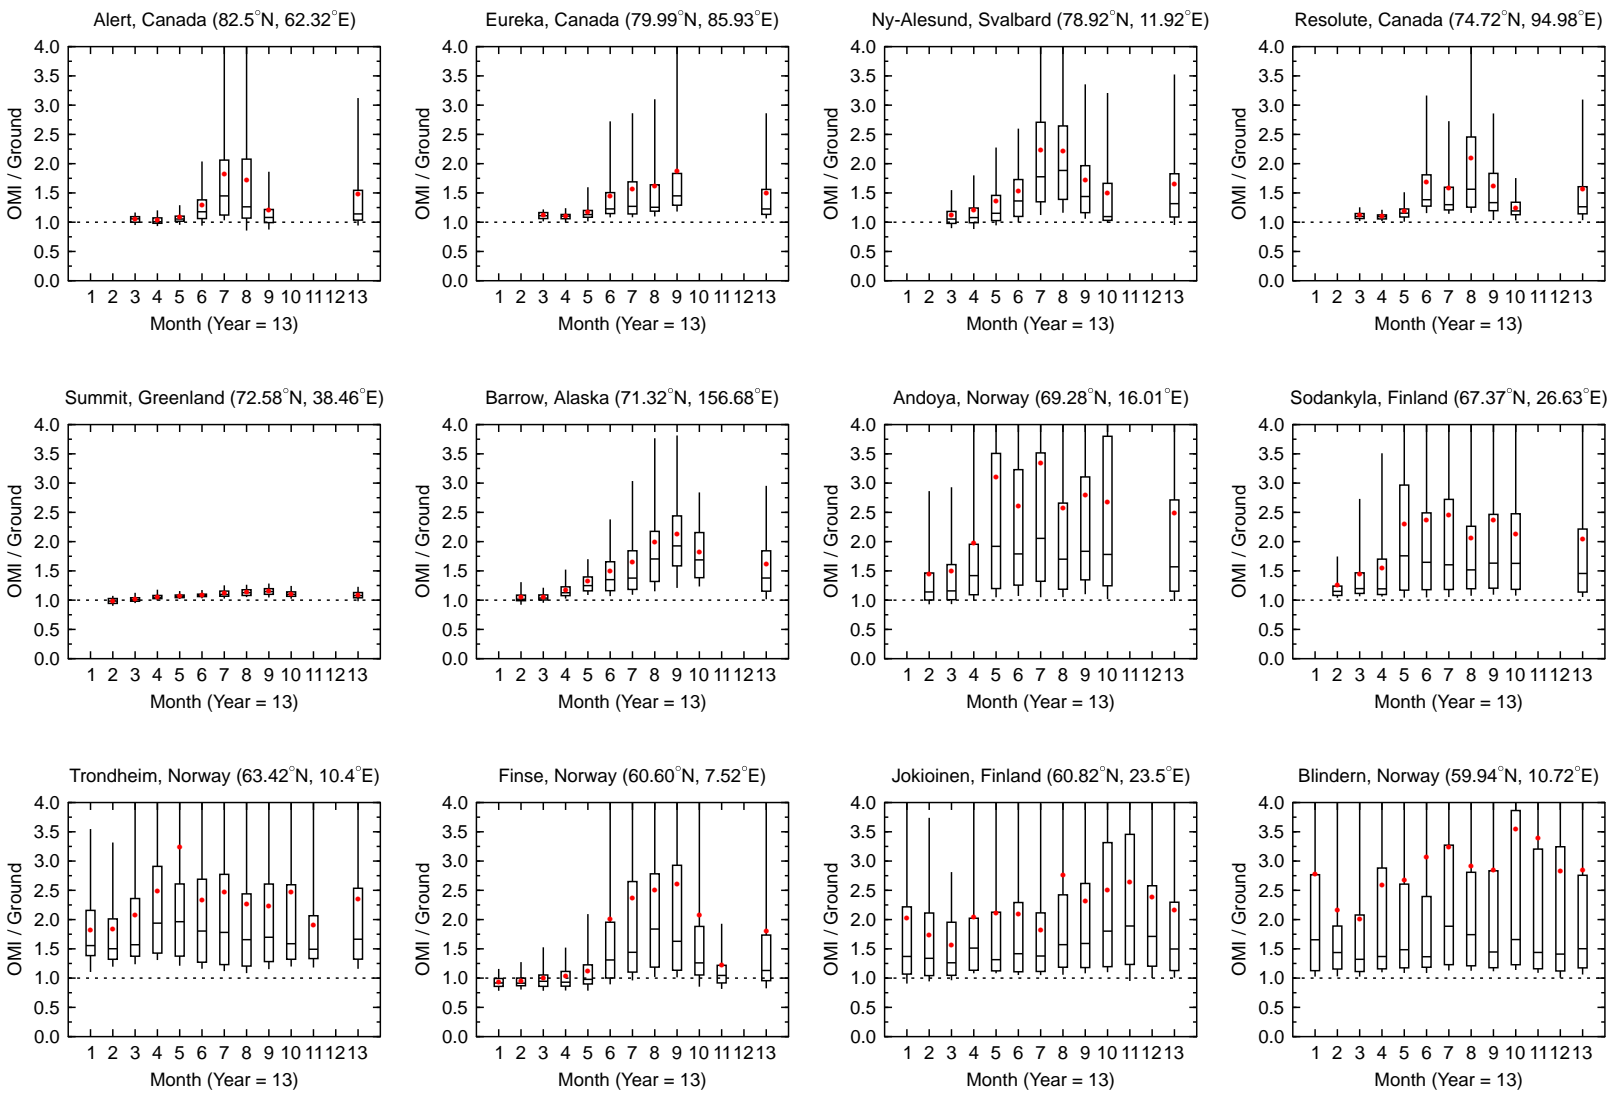

Supplement: Supplementary file 10 [file acp-15-7391-2015-supplement.zip]

CSEDRate (Ground at local solar noon); SZA less than 84; Dist less than 12 km

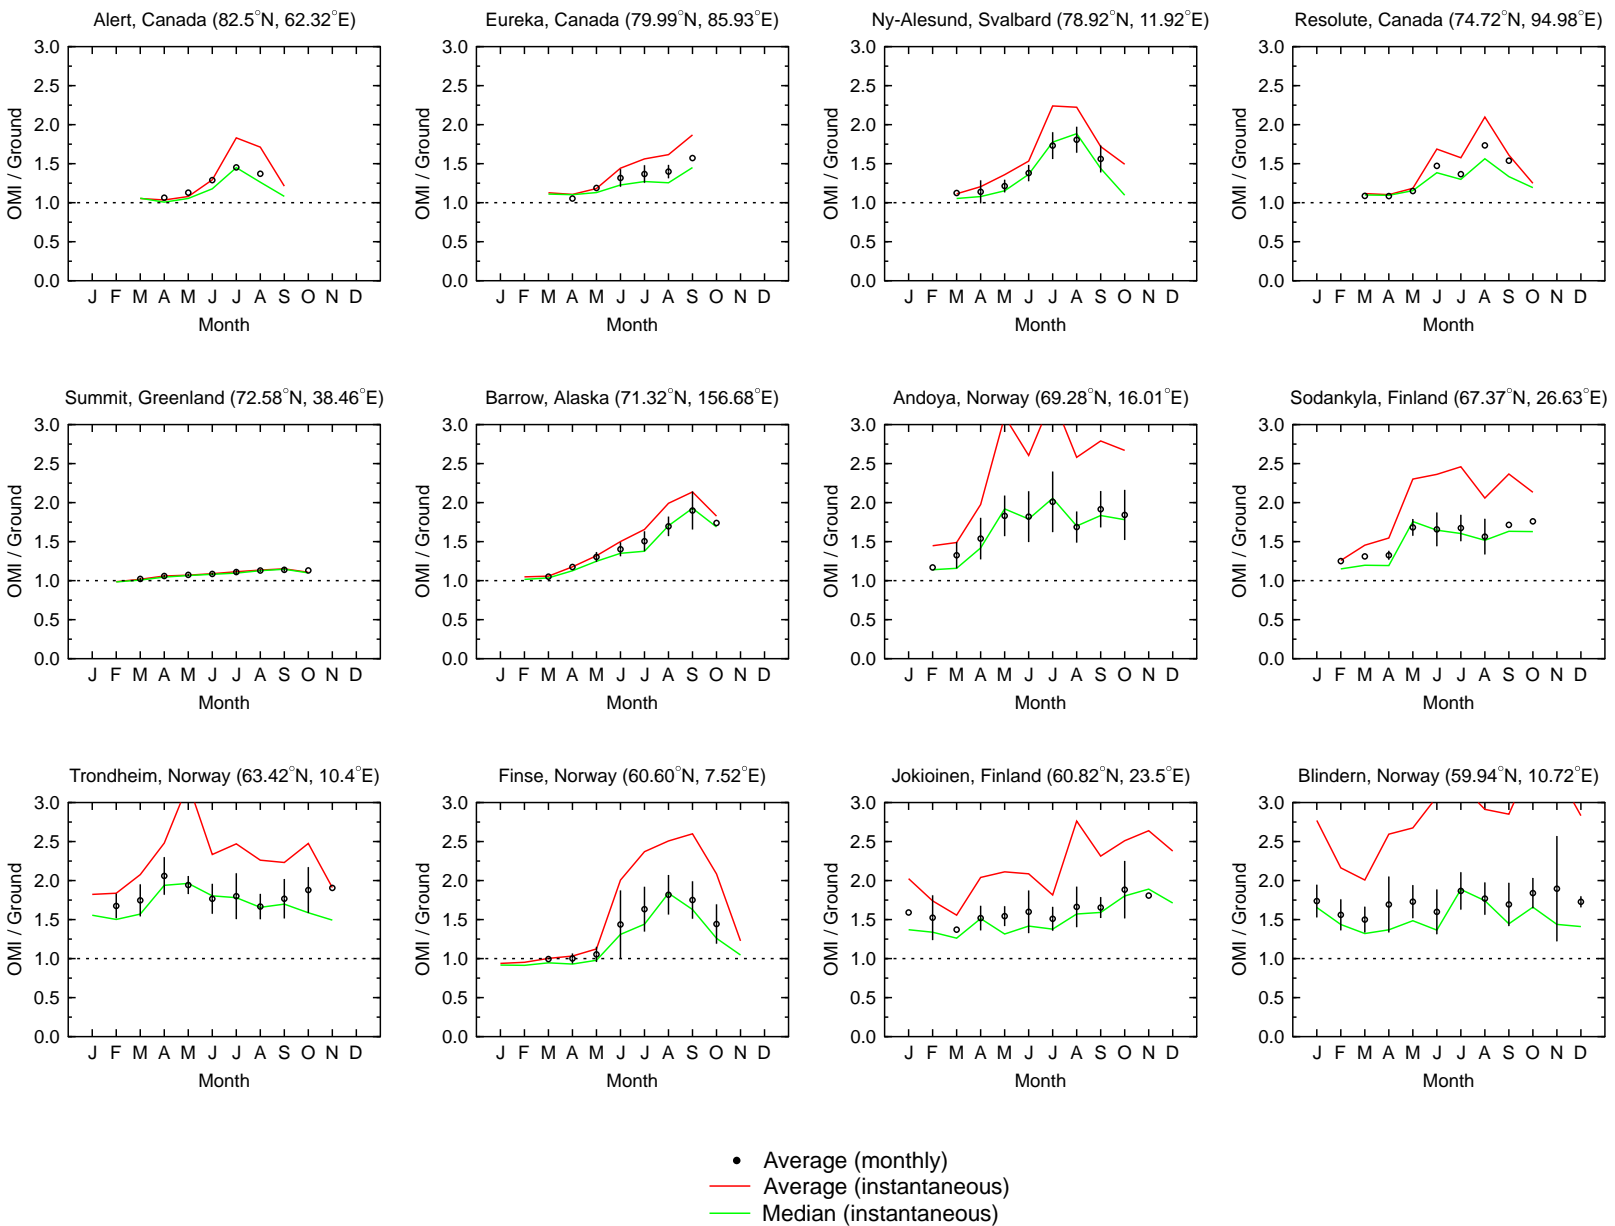

Supplement: Supplementary file 12 [file acp-15-7391-2015-supplement.zip]

EDRate (Ground at local solar noon); SZA less than 84; Dist less than 12 km

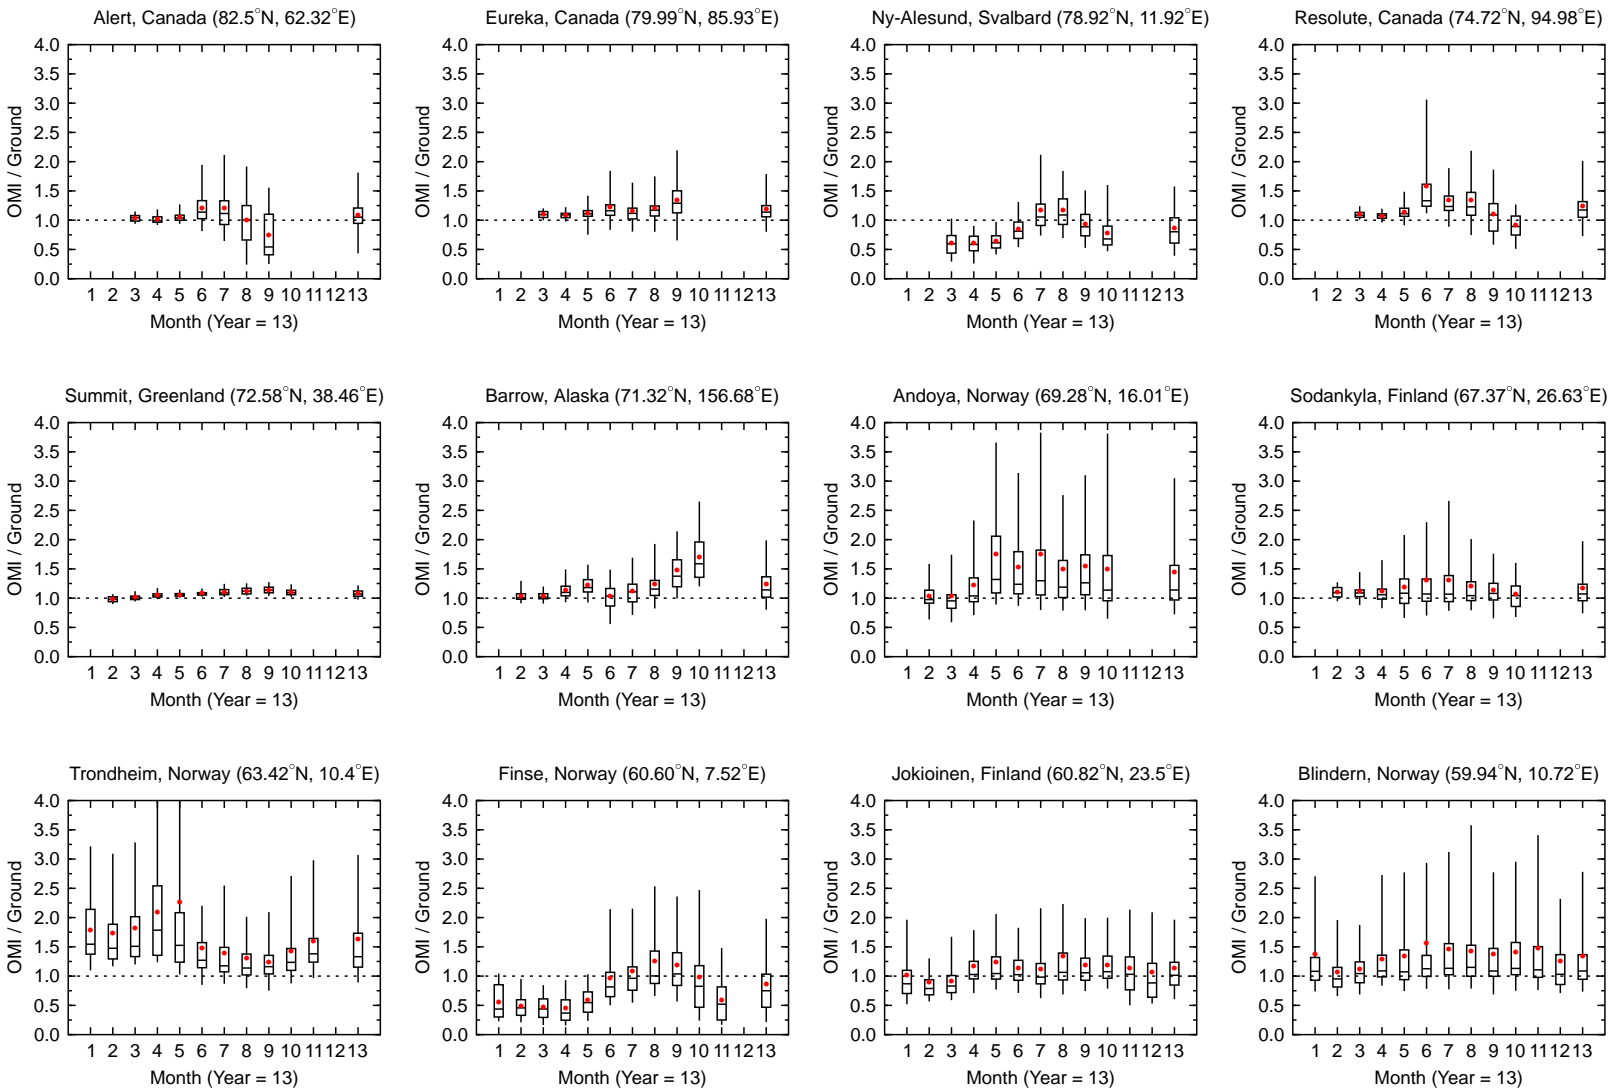

Supplement: Supplementary file 23 [file acp-15-7391-2015-supplement.zip]

EDDose; all data

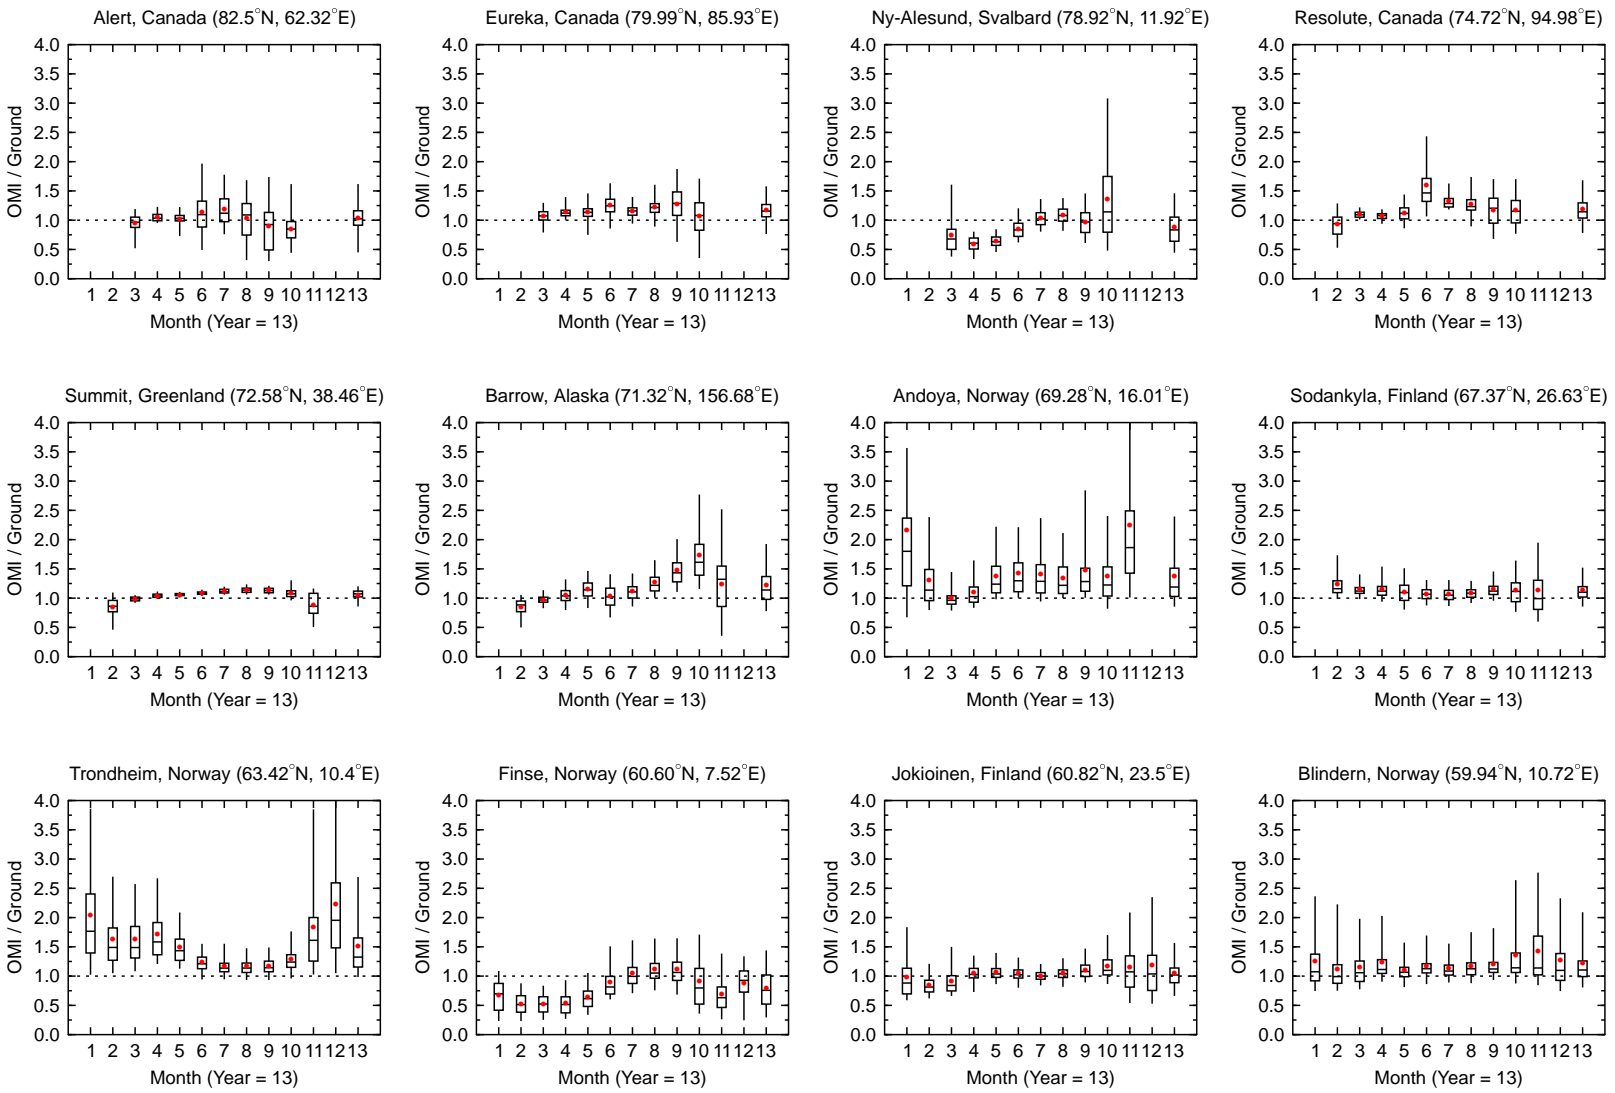

Supplement: Supplementary file 26 [file acp-15-7391-2015-supplement.zip]

CSEDDose; SZA less than 84; Dist less than 12 km

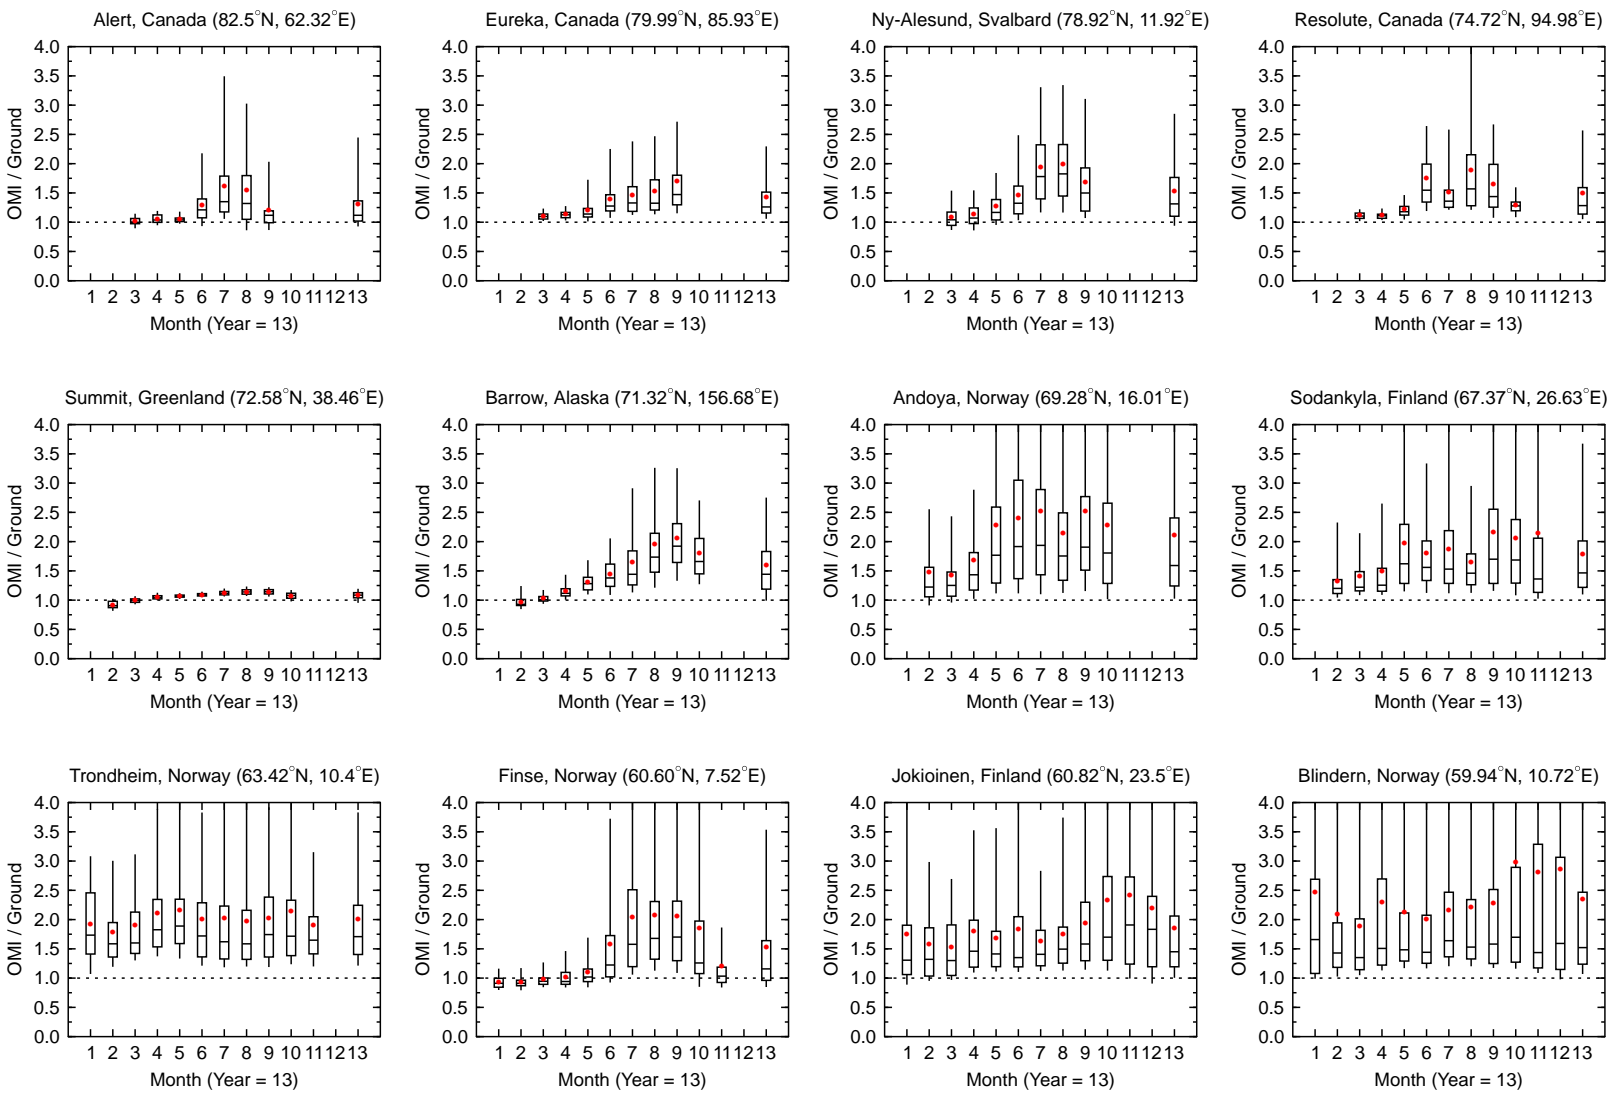

Supplement: Supplementary file 29 [file acp-15-7391-2015-supplement.zip]

EDDose; all data

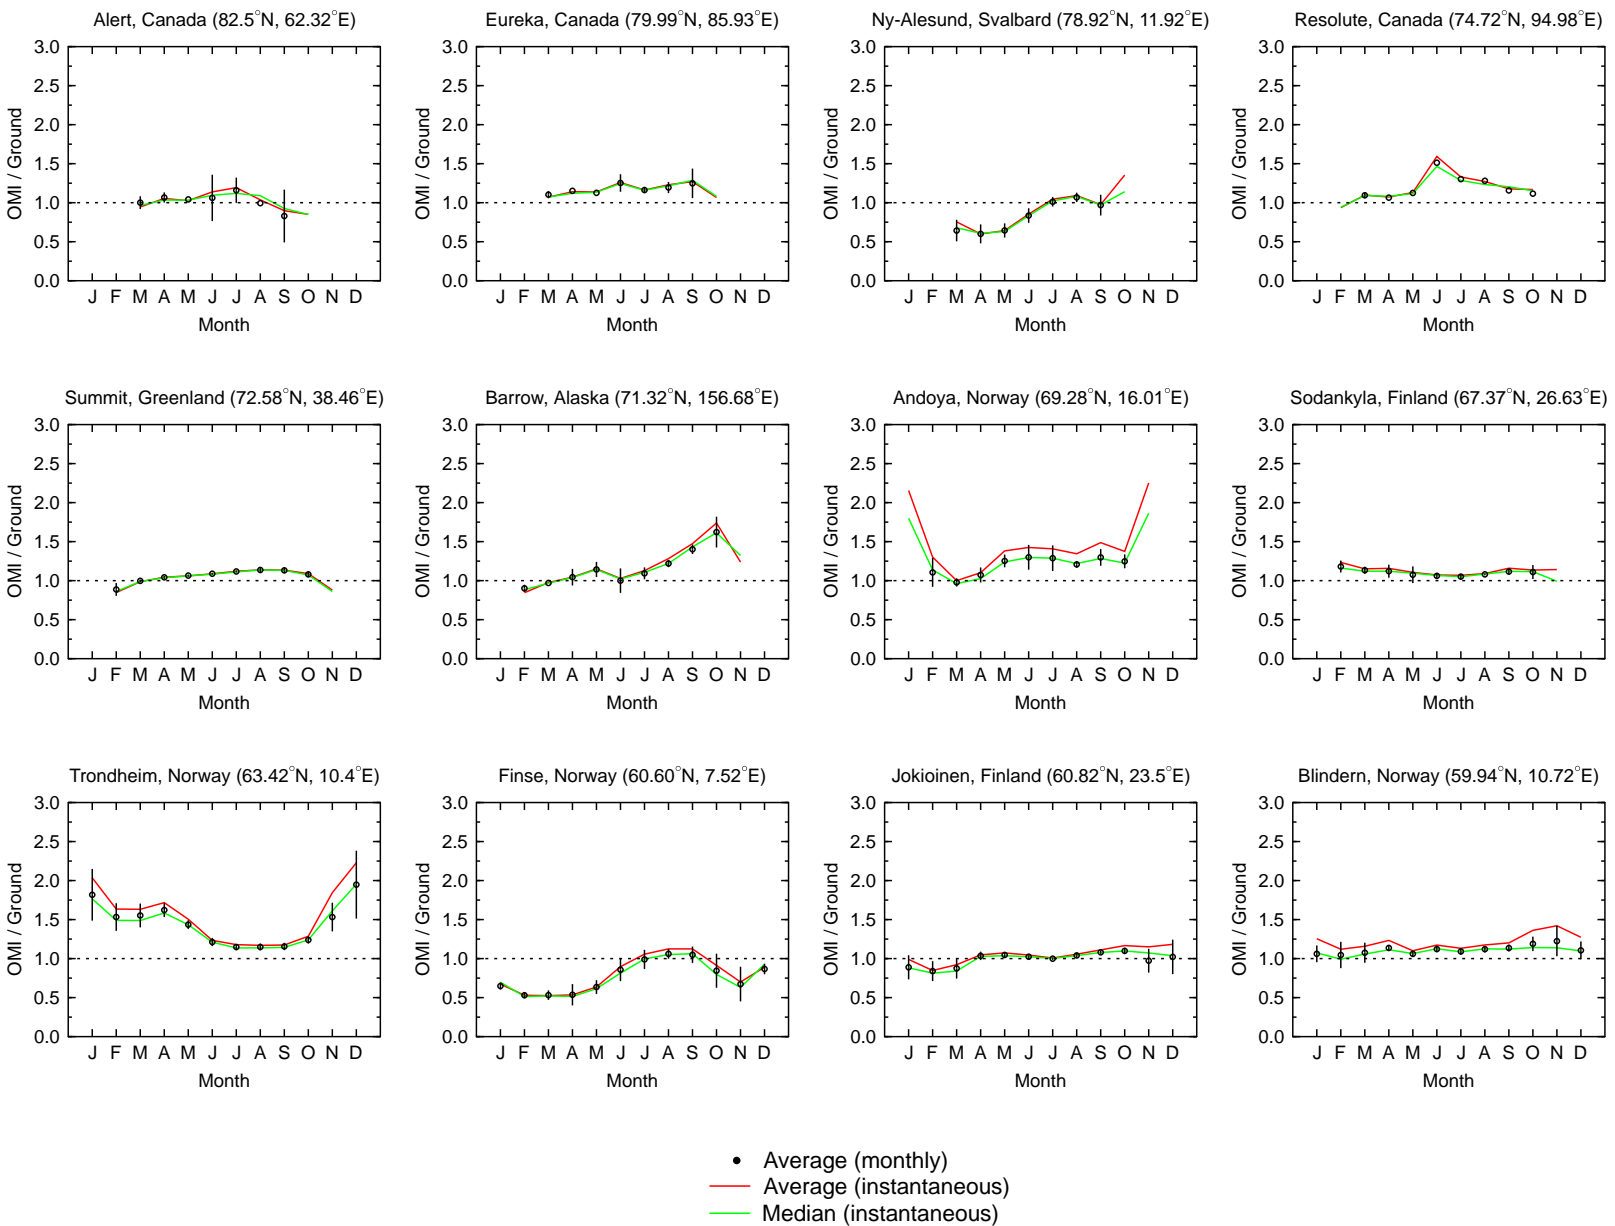

Supplement: Supplementary file 45 [file acp-15-7391-2015-supplement.zip]

OPEDRate; SZA less than 84; Dist less than 12 km

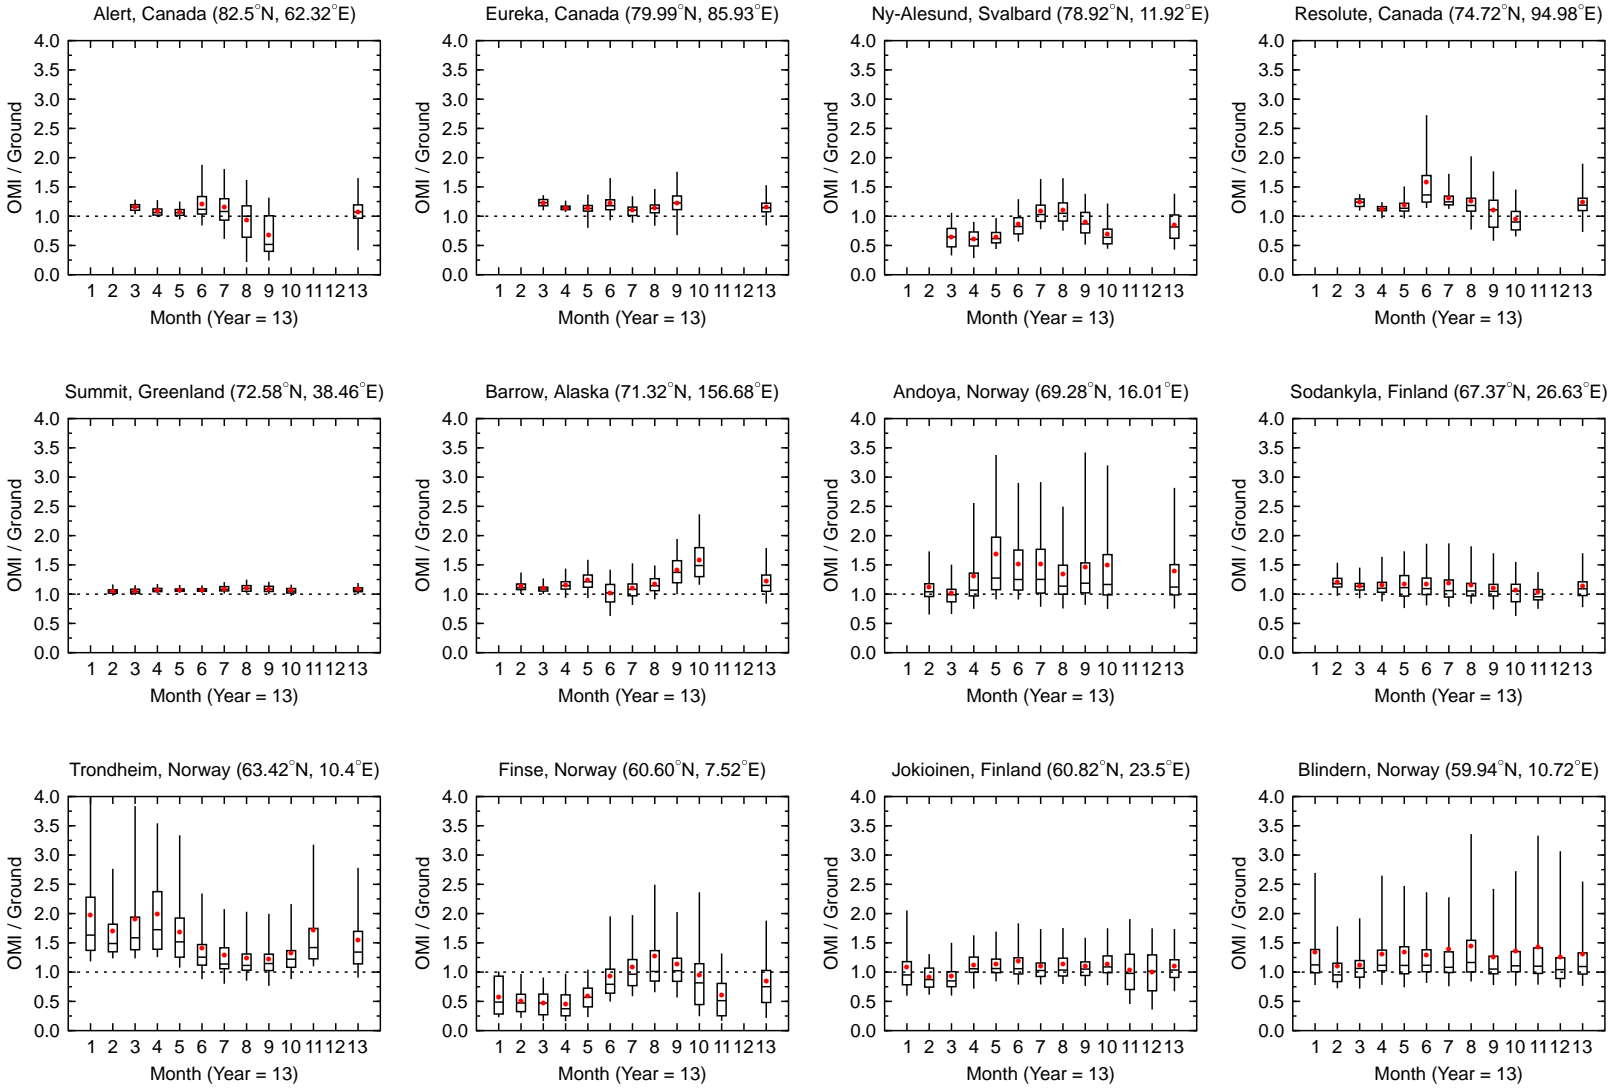

Supplement: Supplementary file 62 [file acp-15-7391-2015-supplement.zip]

EDDose; SZA less than 84; Dist less than 12 km

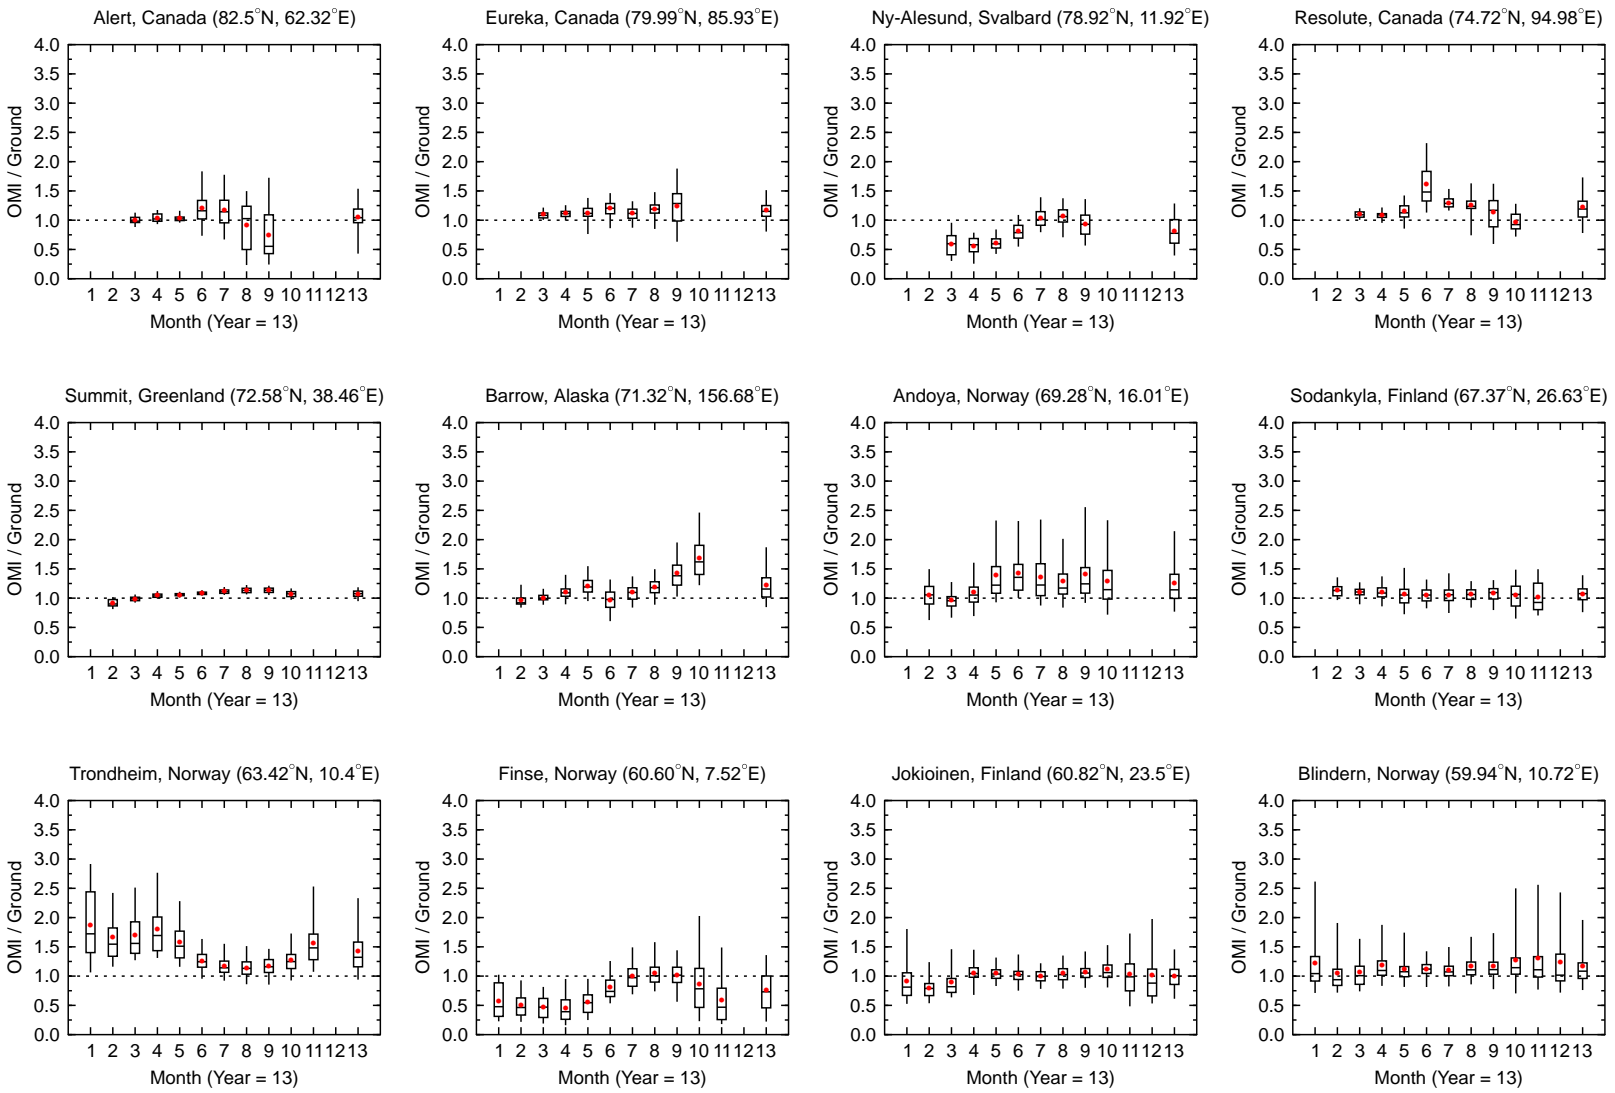

Supplement: Supplementary file 76 [file acp-15-7391-2015-supplement.zip]

CSEDDose; SZA less than 84; Dist less than 12 km

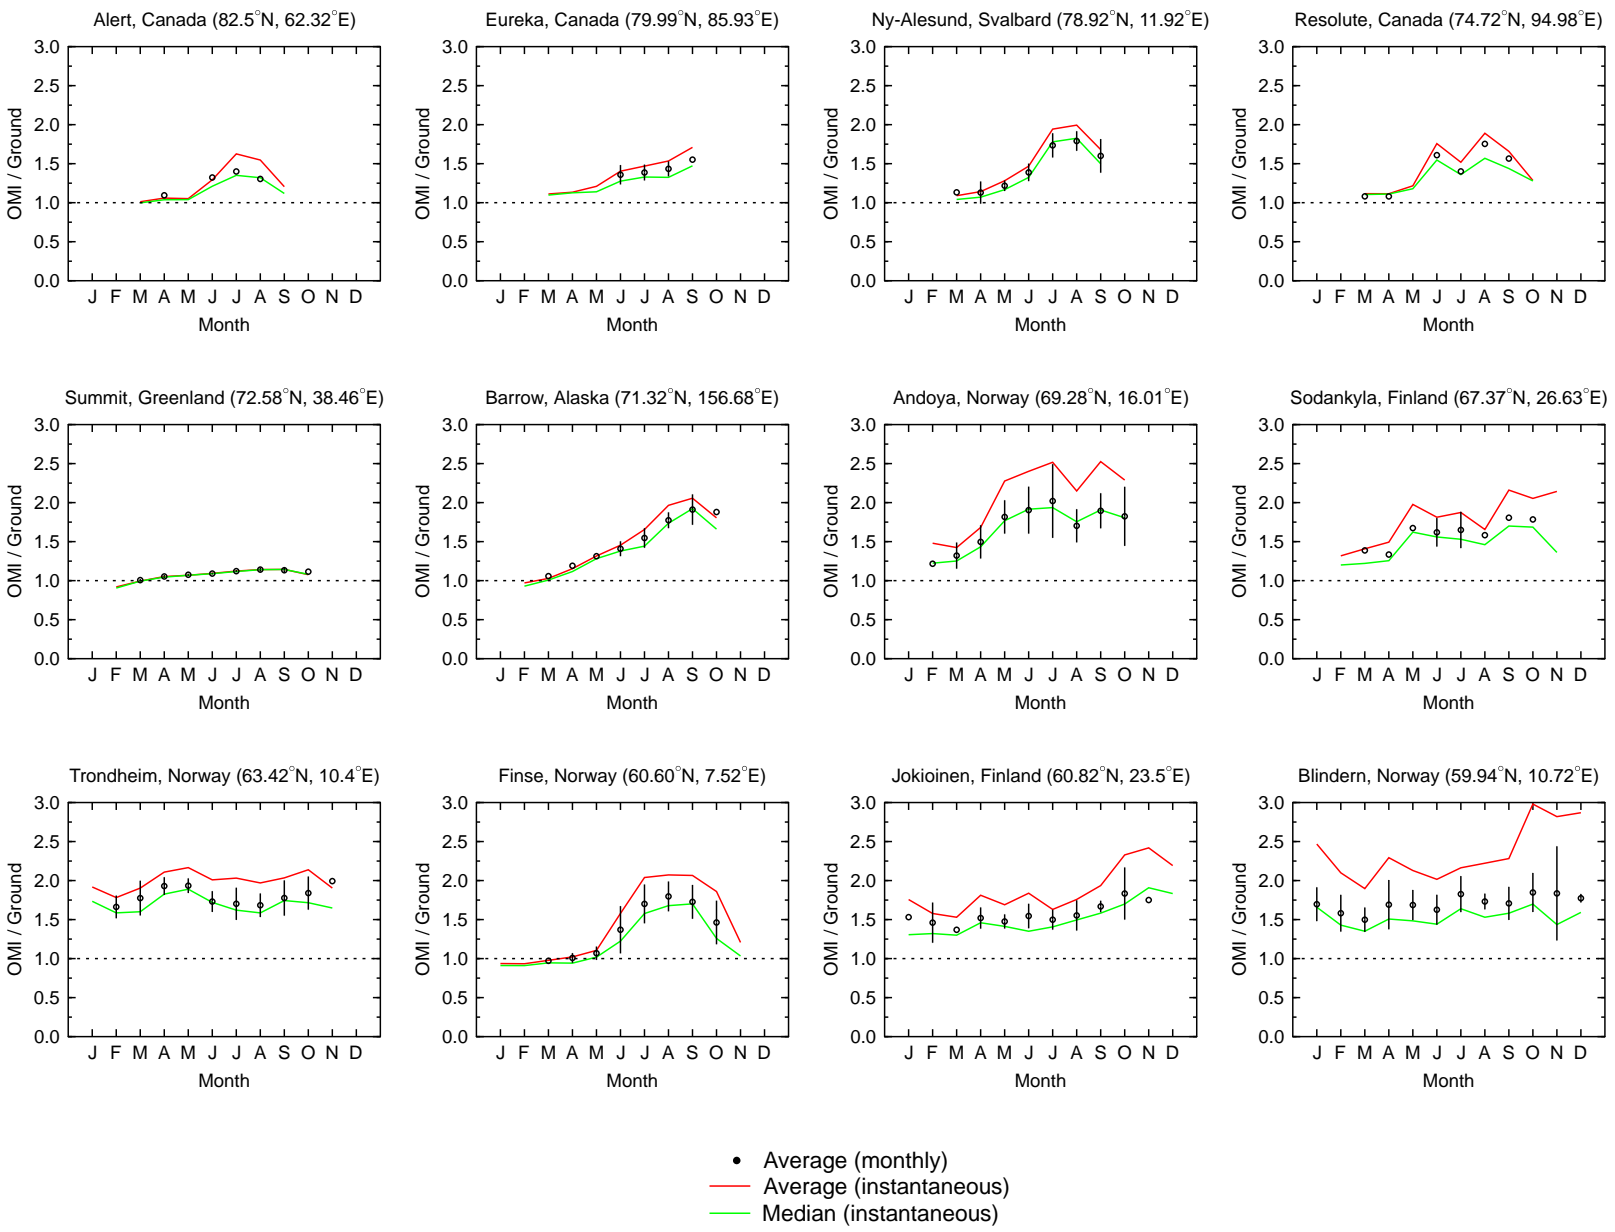

Supplement: Supplementary file 87 [file acp-15-7391-2015-supplement.zip]

EDDose; SZA less than 84; Dist less than 12 km

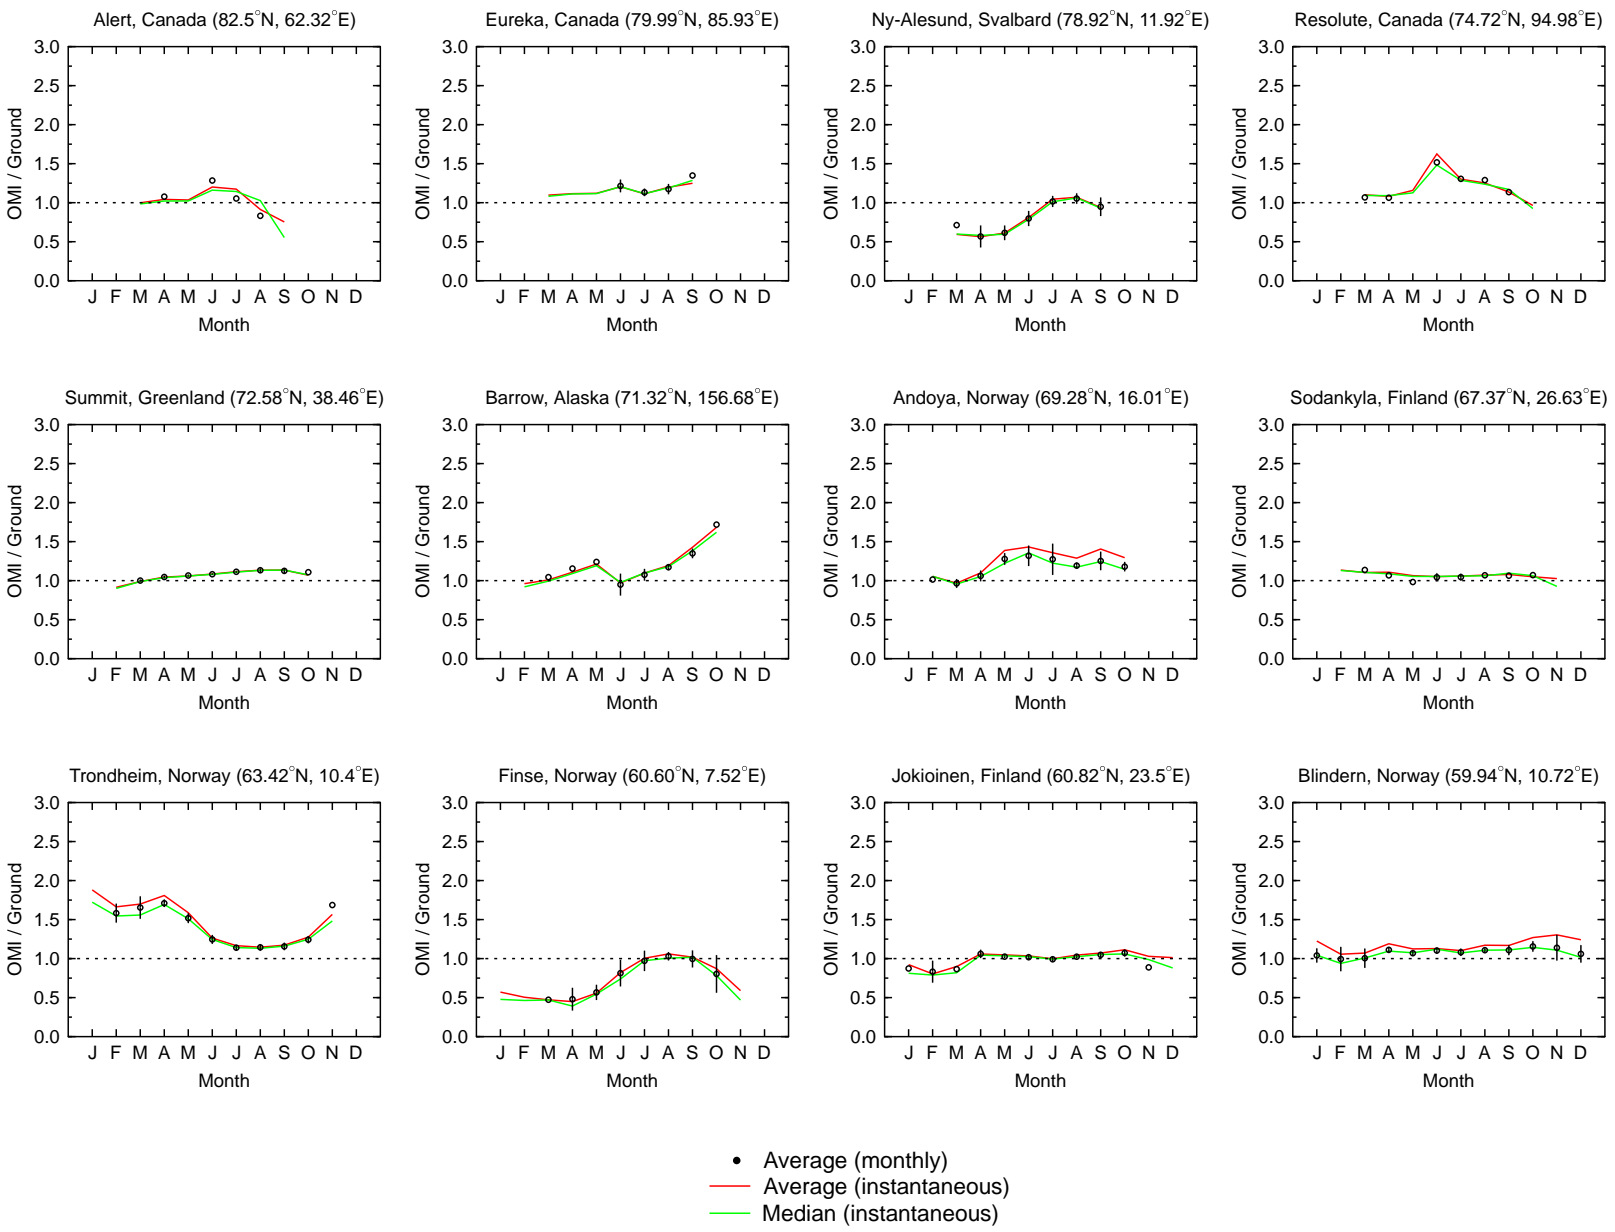

Supplement: Supplementary file 91 [file acp-15-7391-2015-supplement.zip]
